# Supplementary material for: Comparison of Multimodal Large Language Models and Physicians for Medical Diagnosis Using NEJM Image Challenge Cases: Cross-sectional Study
Source: Research Square preprint supplement (doi:10.21203/rs.3.rs-7175790/v1), 2025-09-01
Supplement: Supplementary file 1 [file 0fbdebb0d673da69b21f568b.xlsx]

## Sheet: Sheet1
patient_id	gender	age_category	image_only	image_type	official_choice	correct_answer	disease_classification	choice_a	choice_b	choice_c	choice_d	choice_e	choice_right	doctor_total_responses	chat_gpt4o_accuracy	claude_accuracy	doubao_accuracy	chatgpt_4o_option	chat_gpt4o_correct_yes_no	chat_gpt4o_explanation_reasonable	claude_3_7_option	claude_3_7_correct_yes_no	claude_explanation_reasonable	doubao_option	doubao_correct_yes_no	doubao_explanation_reasonable	chat_gpt4o_correct	claude_correct	doubao_correct	patient_date	test_date	case_url	question_body	chat_gpt4o_answer	claude_3_7_answer	doubao_answer
20190627	0	32	1	Pathological	B	Enterobiasis	infectious_diseases	0.04	0.52	0.22	0.19	0.03	0.52	66735	1	0	1	B	Yes	No	C	No	No	B	Yes	No	Yes	No	Yes	2019-06-27	2025-04-11	https://www.nejm.org/image-challenge?ci=20190627&startFrom=301&startPage=16	A 32-year-old woman presented to the outpatient clinic with a 2-month history of anal pruritus and bleeding. Her abdominal examination was normal, and rectal examination revealed hemorrhoids. What is the most likely diagnosis?_x000D__x000D__x000D_ _x000D__x000D__x000D_ A.Hemorrhoids_x000D__x000D__x000D_ _x000D__x000D__x000D_ B.Enterobiasis_x000D__x000D__x000D_ _x000D__x000D__x000D_ C.Trichuriasis…	**Correct Answer: B. Enterobiasis**_x000D__x000D__x000D_ _x000D__x000D__x000D_ ---_x000D__x000D__x000D_ _x000D__x000D__x000D_ ### **Rationale:**_x000D__x000D__x000D_ _x000D__x000D__x000D_ The image shows **ovoid, thick-walled eggs with a characteristic flattened side**, and an **internal coiled larva**, seen in a **wet mount or histologic section**, most consistent with **Enterobius vermicularis …	Based on the provided microscopic image, the correct answer is:_x000D__x000D__x000D_ _x000D__x000D__x000D_ **C. Trichuriasis**_x000D__x000D__x000D_ _x000D__x000D__x000D_ ## Rationale for Trichuriasis:_x000D__x000D__x000D_ _x000D__x000D__x000D_ The image shows characteristic microscopic findings of *Trichuris trichiura* (whipworm) eggs. These eggs have a distinctive appearance:_x000D__x000D__x000D…	Answer: B (Enterobiasis)_x000D__x000D__x000D_ Rationale_x000D__x000D__x000D_ Support for Enterobiasis_x000D__x000D__x000D_ Microscopic appearance: The image shows characteristic ova of Enterobius vermicularis, which is the causative agent of enterobiasis. These ova are typically oval - shaped with a flattened side, and their presence is diagnostic of this parasitic infection._x000D__x000D__x000D_…
20190704	1	68	1	Physical Signs	C	Ludwig’s angina	vascular_diseases	0.1	0.09	0.54	0.16	0.12	0.54	80044	0	0	0	D	No	No	D	No	No	E	No	No	No	No	No	2019-07-04	2025-04-11	https://www.nejm.org/image-challenge?ci=20190704&startFrom=301&startPage=16	A 68-year-old man presented to the emergency department with a 2-day history of swelling of the neck. One week before presentation, he had a toothache, followed by fever and progressive difficulty and pain with swallowing both solids and liquids. Examination showed right submandibular and submental swelling with marked edema of the floor of the mouth, resulting in superior displacement of the ton…	**Correct Answer: D. Sialolithiasis**_x000D__x000D__x000D_ _x000D__x000D__x000D_ ---_x000D__x000D__x000D_ _x000D__x000D__x000D_ ### **Rationale:**_x000D__x000D__x000D_ _x000D__x000D__x000D_ The image shows a firm swelling under the tongue, in the floor of the mouth, consistent with **a submandibular duct (Wharton’s duct) obstruction**. There is visible erythema and bulging in the area where the d…	Based on the clinical image provided, I'll analyze each option to determine the most likely diagnosis._x000D__x000D__x000D_ _x000D__x000D__x000D_ The correct answer is: D. Sialolithiasis_x000D__x000D__x000D_ _x000D__x000D__x000D_ Rationale for selecting sialolithiasis:_x000D__x000D__x000D_ The image shows evidence of inflammation of the floor of the mouth with what appears to be a swollen subling…	Answer: E (IgG4 - related disease)_x000D__x000D__x000D_ Rationale_x000D__x000D__x000D_ Support for IgG4 - related disease_x000D__x000D__x000D_ Clinical appearance: IgG4 - related disease can present with salivary gland involvement, leading to swelling and inflammation. The image shows swelling and redness in the submandibular region, which is consistent with salivary gland involvement characteris…
20190711	1	1-12	1	Physical Signs	B	Multiple endocrine neoplasia type 2B	metabolic_nutritional_diseases	0.17	0.34	0.19	0.13	0.17	0.34	138518	1	1	0	B	Yes	No	B	Yes	No	C	No	No	Yes	Yes	No	2019-07-11	2025-04-10	https://www.nejm.org/image-challenge?ci=20190711&startFrom=301&startPage=16	A 7-year-old boy presented to the pediatric otolaryngology clinic with a 3-year history of multiple firm, painless, slow-growing nodules on his tongue. He had a history of mild developmental delay, and a physical examination showed a high arched palate and marfanoid habitus. What is the most likely underlying diagnosis?_x000D__x000D__x000D_ _x000D__x000D__x000D_ A.Gaucher’s disease_x000D__x000D__…	**Correct answer: B. Multiple endocrine neoplasia type 2B (MEN 2B)**_x000D__x000D__x000D_ _x000D__x000D__x000D_ ---_x000D__x000D__x000D_ _x000D__x000D__x000D_ ### **Rationale:**_x000D__x000D__x000D_ _x000D__x000D__x000D_ The image shows multiple **soft, pinkish, smooth papules** on the anterior portion of the tongue. These lesions are characteristic of **mucosal neuromas**, which are highly sugge…	Based on the clinical image, the correct answer is:_x000D__x000D__x000D_ _x000D__x000D__x000D_ **B. Multiple endocrine neoplasia type 2B**_x000D__x000D__x000D_ _x000D__x000D__x000D_ ## Rationale for choosing Multiple endocrine neoplasia type 2B:_x000D__x000D__x000D_ _x000D__x000D__x000D_ The image shows characteristic oral mucosal neuromas (small, raised, nodular lesions) on the anterior portion …	Answer: C (Tuberous sclerosis)_x000D__x000D__x000D_ Rationale_x000D__x000D__x000D_ Support for Tuberous sclerosis_x000D__x000D__x000D_ Clinical appearance: Tuberous sclerosis can present with oral lesions such as angiofibromas on the tongue. The image shows small, raised, pinkish lesions on the tongue, which are consistent with the oral manifestations of tuberous sclerosis. This condition is also…
20190718	1	60	1	Endoscopic	C	Tonsillar cancer	neoplastic_diseases	0.1	0.17	0.46	0.07	0.19	0.46	90159	1	0	0	C	Yes	No	E	No	No	A	No	No	Yes	No	No	2019-07-18	2025-04-10	https://www.nejm.org/image-challenge?ci=20190718&startFrom=281&startPage=15	A 60-year-old man presented to the otolaryngology clinic with a 2-month history of a firm, painless mass on the right side of his neck. He had no history of smoking or heavy alcohol use and denied any changes in voice or difficulty swallowing. Physical examination showed unilateral enlargement of the right tonsil. What is the correct diagnosis?_x000D__x000D__x000D_ _x000D__x000D__x000D_ A.Periton…	**Correct answer: C. Tonsillar cancer**_x000D__x000D__x000D_ _x000D__x000D__x000D_ ---_x000D__x000D__x000D_ _x000D__x000D__x000D_ ### **Rationale:**_x000D__x000D__x000D_ _x000D__x000D__x000D_ The provided image shows **asymmetric tonsillar enlargement** with irregular surface features and possible infiltration of surrounding tissue. The left tonsil appears significantly enlarged, has an irregular…	Based on the endoscopic image provided, I'd select:_x000D__x000D__x000D_ _x000D__x000D__x000D_ **E. Benign tonsillar hypertrophy**_x000D__x000D__x000D_ _x000D__x000D__x000D_ ## Rationale for choosing benign tonsillar hypertrophy:_x000D__x000D__x000D_ _x000D__x000D__x000D_ The image shows an endoscopic view of the oropharynx with enlarged palatine tonsils. The tonsillar tissue appears symmetricall…	Answer: A (Peritonsillar abscess)_x000D__x000D__x000D_ Rationale_x000D__x000D__x000D_ Support for Peritonsillar abscess_x000D__x000D__x000D_ Endoscopic appearance: The image shows an inflamed area near the tonsil with a collection of purulent material, which is characteristic of a peritonsillar abscess. This condition is a complication of tonsillitis, where infection spreads to the peritonsillar …
20190725	1	48	1	Physical Signs	B	Anti-MDA5 dermatomyositis	immune_mediated_diseases	0.17	0.36	0.16	0.18	0.13	0.36	126169	1	0	1	B	Yes	No	D	No	No	B	Yes	Yes	Yes	No	Yes	2019-07-25	2025-04-10	https://www.nejm.org/image-challenge?ci=20190725&startFrom=281&startPage=15	A 48-year-old man presented to the dermatology clinic with a 6-month history of painful hand ulcerations and shortness of breath. He has no muscle weakness or arthritis. What is the diagnosis?_x000D__x000D__x000D_ _x000D__x000D__x000D_ A.CREST syndrome_x000D__x000D__x000D_ _x000D__x000D__x000D_ B.Anti-MDA5 dermatomyositis_x000D__x000D__x000D_ _x000D__x000D__x000D_ C.Pyoderma gangrenosum_x000D__x0…	**Correct Answer: B. Anti-MDA5 dermatomyositis**_x000D__x000D__x000D_ _x000D__x000D__x000D_ ---_x000D__x000D__x000D_ _x000D__x000D__x000D_ ### **Clinical Reasoning and Diagnosis:**_x000D__x000D__x000D_ _x000D__x000D__x000D_ The image shows **painful ulcerative skin lesions over the dorsal hands and overlying joints**, particularly the **metacarpophalangeal (MCP) and proximal interphalangeal (PIP)…	Looking at the clinical image, I can identify the most likely diagnosis from the options provided._x000D__x000D__x000D_ _x000D__x000D__x000D_ **The correct answer is D. Cutaneous polyarteritis nodosa.**_x000D__x000D__x000D_ _x000D__x000D__x000D_ ## Rationale for the correct diagnosis:_x000D__x000D__x000D_ The image shows both hands with multiple well-defined, yellowish-white, ulcerated nodular le…	Answer: B (Anti - MDA5 dermatomyositis)_x000D__x000D__x000D_ Rationale_x000D__x000D__x000D_ Support for Anti - MDA5 dermatomyositis_x000D__x000D__x000D_ Clinical appearance: Anti - MDA5 dermatomyositis can present with characteristic skin lesions such as ulcerative lesions on the hands, often with a necrotic center and erythematous border. The image shows ulcerative lesions on the hands that matc…
20190801	0	56	1	Radiological	D	Gastrosplenic fistulization	traumatic_physical_diseases	0.18	0.09	0.28	0.35	0.1	0.35	88247	0	0	0	C	No	No	C	No	No	C	No	No	No	No	No	2019-08-01	2025-04-10	https://www.nejm.org/image-challenge?ci=20190801&startFrom=281&startPage=15	A 56-year-old woman presented to the emergency department with a 1-month history of abdominal pain in the left upper quadrant. Her medical history was notable for polysubstance use disorder, hepatitis C virus infection, and rheumatoid arthritis managed with naproxen. Computed tomography of the abdomen was performed. What is the most likely diagnosis?_x000D__x000D__x000D_ _x000D__x000D__x000D_ A.A…	**Correct answer: C. Emphysematous infection of the spleen**_x000D__x000D__x000D_ _x000D__x000D__x000D_ ---_x000D__x000D__x000D_ _x000D__x000D__x000D_ ### **Rationale:**_x000D__x000D__x000D_ _x000D__x000D__x000D_ The **coronal CT image** reveals gas within the spleen (seen as numerous low-density, mottled, bubbly regions in the left upper quadrant), which is *highly characteristic of emphysematou…	Based on the CT image provided, I'll analyze the findings and identify the most likely diagnosis from the given options._x000D__x000D__x000D_ _x000D__x000D__x000D_ The correct answer is: **C. Emphysematous infection of the spleen**_x000D__x000D__x000D_ _x000D__x000D__x000D_ ## Rationale for the chosen diagnosis:_x000D__x000D__x000D_ _x000D__x000D__x000D_ The CT image shows a coronal view of the a…	Answer: C (Emphysematous infection of the spleen)_x000D__x000D__x000D_ Rationale_x000D__x000D__x000D_ Support for Emphysematous infection of the spleen_x000D__x000D__x000D_ CT appearance: The CT scan shows gas within the spleen, which is characteristic of emphysematous infection. This condition is caused by gas - forming organisms infecting the spleen, leading to the presence of gas bubbles withi…
20190808	1	79	1	Pathological	D	Cholesterol crystal embolization	vascular_diseases	0.1	0.17	0.13	0.49	0.12	0.49	57605	1	1	1	D	Yes	No	D	Yes	No	D	Yes	No	Yes	Yes	Yes	2019-08-08	2025-04-10	https://www.nejm.org/image-challenge?ci=20190808&startFrom=281&startPage=15	A 79-year-old man with a history of ischemic cardiomyopathy and chronic kidney disease presented 1 month after a transcatheter aortic-valve replacement (TAVR) with a serum creatinine level of 4.0 mg per deciliter (350 μmol per liter), up from a baseline of 1.6 mg per deciliter (140 μmol per liter). Renal biopsy is shown. What is the most likely diagnosis?_x000D__x000D__x000D_ _x000D__x000D__x000D…	**Correct answer: D. Cholesterol crystal embolization**_x000D__x000D__x000D_ _x000D__x000D__x000D_ ---_x000D__x000D__x000D_ _x000D__x000D__x000D_ ### **Rationale:**_x000D__x000D__x000D_ _x000D__x000D__x000D_ The image is a histologic section of renal parenchyma stained with a trichrome stain. Key findings include:_x000D__x000D__x000D_ _x000D__x000D__x000D_ * A small renal artery (bottom center) w…	Based on the histopathological image provided, the correct answer is:_x000D__x000D__x000D_ _x000D__x000D__x000D_ **D. Cholesterol crystal embolization**_x000D__x000D__x000D_ _x000D__x000D__x000D_ ## Rationale for cholesterol crystal embolization:_x000D__x000D__x000D_ _x000D__x000D__x000D_ The image shows renal tissue with a characteristic finding of cholesterol crystal embolization. In the center…	Answer: D (Cholesterol crystal embolization)_x000D__x000D__x000D_ Rationale_x000D__x000D__x000D_ Support for Cholesterol crystal embolization_x000D__x000D__x000D_ Microscopic appearance: The image shows characteristic cholesterol clefts within the tissue, which are indicative of cholesterol crystal embolization. These clefts are formed when cholesterol crystals are embolized and occlude small blo…
20190815	1	80	1	Radiological	D	Emphysematous cholecystitis	infectious_diseases	0.06	0.06	0.07	0.73	0.09	0.73	48833	1	1	1	D	Yes	No	D	Yes	No	D	Yes	No	Yes	Yes	Yes	2019-08-15	2025-04-10	https://www.nejm.org/image-challenge?ci=20190815&startFrom=281&startPage=15	An 80-year-old man presented to the emergency department with a 2-day history of abdominal pain in the right upper quadrant. On physical examination, he had abdominal tenderness in the right upper quadrant, and Murphy’s sign was positive. The alanine aminotransferase, aspartate aminotransferase, bilirubin, and lipase levels were normal. Computed tomography of the abdomen is shown. What is the dia…	**Correct answer: D. Emphysematous cholecystitis**_x000D__x000D__x000D_ _x000D__x000D__x000D_ ---_x000D__x000D__x000D_ _x000D__x000D__x000D_ ### **Rationale:**_x000D__x000D__x000D_ _x000D__x000D__x000D_ The axial CT image of the abdomen reveals a distended gallbladder with intraluminal and intramural gas — a hallmark finding consistent with **emphysematous cholecystitis**. This form of cholecysti…	Looking at this abdominal CT image, I can identify the correct diagnosis and explain my reasoning._x000D__x000D__x000D_ _x000D__x000D__x000D_ **The correct answer is D. Emphysematous cholecystitis.**_x000D__x000D__x000D_ _x000D__x000D__x000D_ ## Rationale for diagnosis:_x000D__x000D__x000D_ The CT image shows a gallbladder with an irregular wall containing air density (appearing as dark areas) wi…	Answer: D (Emphysematous cholecystitis)_x000D__x000D__x000D_ Rationale_x000D__x000D__x000D_ Support for Emphysematous cholecystitis_x000D__x000D__x000D_ CT appearance: The CT scan shows gas within the gallbladder wall, which is a characteristic finding of emphysematous cholecystitis. This condition is a severe form of acute cholecystitis caused by gas - forming organisms, and the presence of gas …
20190822	1	48	1	Radiological	C	Epiglottitis	infectious_diseases	0.12	0.12	0.52	0.09	0.14	0.52	86545	1	1	1	C	Yes	No	C	Yes	No	C	Yes	No	Yes	Yes	Yes	2019-08-22	2025-04-10	https://www.nejm.org/image-challenge?ci=20190822&startFrom=281&startPage=15	A fully immunized 48-year-old man presented to an urgent care clinic with a 3-day history of odynophagia, fever, and progressive dyspnea. Physical examination demonstrated stridor and use of accessory muscles for respiration. A lateral radiograph of the neck was performed. What is the most likely diagnosis?_x000D__x000D__x000D_ _x000D__x000D__x000D_ A.Inhaled foreign body_x000D__x000D__x000D_ _x0…	**Correct Answer: C. Epiglottitis**_x000D__x000D__x000D_ _x000D__x000D__x000D_ ---_x000D__x000D__x000D_ _x000D__x000D__x000D_ ### **Rationale:**_x000D__x000D__x000D_ _x000D__x000D__x000D_ The lateral neck radiograph demonstrates a **classic “thumbprint sign”** — a hallmark radiologic feature of **acute epiglottitis**. This appearance results from **edema and inflammation of the epiglottis**, caus…	Thank you for providing the lateral neck X-ray image and diagnostic options. Based on my analysis:_x000D__x000D__x000D_ _x000D__x000D__x000D_ The correct answer is C. Epiglottitis._x000D__x000D__x000D_ _x000D__x000D__x000D_ The lateral neck X-ray shows clear evidence of an enlarged, thickened epiglottis with the classic "thumb sign" appearance - a swollen, thumb-shaped epiglottis projecting poste…	Answer: C (Epiglottitis)_x000D__x000D__x000D_ Rationale_x000D__x000D__x000D_ Support for Epiglottitis_x000D__x000D__x000D_ X - ray appearance: The X - ray shows a characteristic "thumbprint sign," which is indicative of epiglottitis. This sign is due to the swelling of the epiglottis, making it appear enlarged and rounded, similar to a thumbprint. Epiglottitis is a serious condition that can caus…
20190829	1	49	1	Endoscopic	B	Carcinoma	neoplastic_diseases	0.16	0.39	0.16	0.12	0.18	0.39	109134	1	0	0	B	Yes	No	A	No	No	A	No	No	Yes	No	No	2019-08-29	2025-04-10	https://www.nejm.org/image-challenge?ci=20190829&startFrom=281&startPage=15	A 49-year-old man with a 3-month history of progressive voice changes and pain with swallowing presents to the otorhinolaryngology clinic. He has a history of hypertension and type 2 diabetes mellitus and is a smoker. He denies any recent weight loss or other systemic symptoms. Fiberoptic laryngoscopy was performed and the following image taken. What is the most likely diagnosis?_x000D__x000D__x0…	**Correct answer: B. Carcinoma**_x000D__x000D__x000D_ _x000D__x000D__x000D_ ---_x000D__x000D__x000D_ _x000D__x000D__x000D_ ### **Diagnostic Reasoning:**_x000D__x000D__x000D_ _x000D__x000D__x000D_ The provided image is an endoscopic view of the larynx showing a **large, irregular, exophytic, and ulcerated mass** on the vocal cord, partially obstructing the glottic airway. The lesion appears **fria…	Looking at this clinical image, I'm examining an endoscopic view of the larynx, specifically focusing on the vocal cord area._x000D__x000D__x000D_ _x000D__x000D__x000D_ The correct answer is: A. Vocal-cord granuloma_x000D__x000D__x000D_ _x000D__x000D__x000D_ Rationale for selecting vocal-cord granuloma:_x000D__x000D__x000D_ The image shows a well-defined, rounded, yellowish-white polypoid mass lo…	Answer: A (Vocal - cord granuloma)_x000D__x000D__x000D_ Rationale_x000D__x000D__x000D_ Support for Vocal - cord granuloma_x000D__x000D__x000D_ Clinical appearance: Vocal - cord granulomas typically present as nodular or polypoid lesions on the vocal cords. The image shows a well - defined, yellowish - white mass on the vocal cord, which is consistent with the appearance of a vocal - cord granulom…
20190905	1	29	1	Physical Signs	B	Disseminated varicella infection	infectious_diseases	0.12	0.53	0.08	0.14	0.13	0.53	93609	1	1	1	B	Yes	No	B	Yes	Yes	B	Yes	Yes	Yes	Yes	Yes	2019-09-05	2025-04-10	https://www.nejm.org/image-challenge?ci=20190905&startFrom=281&startPage=15	A 29-year-old man with a history of aplastic anemia, who was being treated with cyclosporine, presented to the emergency department with a 4-day history of fever, cough, and difficulty breathing at rest. One day before the onset of symptoms, a pruritic rash had developed on his face, trunk, and limbs. On physical examination, he had a diffuse rash at different stages of development, including pap…	**Correct answer: B. Disseminated varicella infection**_x000D__x000D__x000D_ _x000D__x000D__x000D_ ---_x000D__x000D__x000D_ _x000D__x000D__x000D_ ### **Rationale:**_x000D__x000D__x000D_ _x000D__x000D__x000D_ The image shows a widespread vesiculopustular and crusted rash over the trunk, with lesions in various stages of healing—a key hallmark of **varicella (chickenpox)**. When such a rash occurs …	Based on the clinical image provided, I can see a widespread eruption of multiple reddish-purple lesions distributed across the abdomen. I'll analyze this presentation to determine the most likely diagnosis from the options provided._x000D__x000D__x000D_ _x000D__x000D__x000D_ The correct answer is: B. Disseminated varicella infection_x000D__x000D__x000D_ _x000D__x000D__x000D_ Rationale for this d…	Answer: B (Disseminated varicella infection)_x000D__x000D__x000D_ Rationale_x000D__x000D__x000D_ Support for Disseminated varicella infection_x000D__x000D__x000D_ Clinical appearance: The image shows a widespread rash consisting of multiple, small, vesicular - pustular lesions on the skin, which is characteristic of varicella (chickenpox). In a disseminated form, the rash is more extensive and ca…
20190912	0	60	1	Physical Signs	A	Orbital metastasis	neoplastic_diseases	0.53	0.13	0.23	0.03	0.08	0.53	87440	0	0	0	B	No	No	C	No	No	B	No	No	No	No	No	2019-09-12	2025-04-10	https://www.nejm.org/image-challenge?ci=20190912&startFrom=281&startPage=15	A 60-year-old woman presented to the emergency department with a 2-month history of blurry vision in her left eye. Her medical history was notable for breast cancer treated 3 years earlier with lumpectomy, axillary-node dissection, radiation, and hormonal therapy. Physical exam on upward gaze is demonstrated. What is the diagnosis?_x000D__x000D__x000D_ _x000D__x000D__x000D_ A.Orbital metastasis_x…	**Correct Answer: B. Unilateral Graves’ ophthalmopathy**_x000D__x000D__x000D_ _x000D__x000D__x000D_ ---_x000D__x000D__x000D_ _x000D__x000D__x000D_ ### **Diagnostic Reasoning:**_x000D__x000D__x000D_ _x000D__x000D__x000D_ The clinical image shows **proptosis** (forward displacement of the globe) of the **right eye**, with visible sclera above and below the iris (so-called “stare” appearance), lid r…	Based on the clinical image provided, the most likely diagnosis is:_x000D__x000D__x000D_ _x000D__x000D__x000D_ **C. Partial cranial nerve 3 palsy**_x000D__x000D__x000D_ _x000D__x000D__x000D_ ## Rationale for selecting partial CN III palsy:_x000D__x000D__x000D_ _x000D__x000D__x000D_ The image shows a patient with obvious right eye abnormalities, specifically:_x000D__x000D__x000D_ - Significant exo…	Answer: B (Unilateral Grave’s ophthalmopathy)_x000D__x000D__x000D_ Rationale_x000D__x000D__x000D_ Support for Unilateral Grave’s ophthalmopathy_x000D__x000D__x000D_ Clinical appearance: Unilateral Grave’s ophthalmopathy can present with proptosis (bulging of the eye), eyelid retraction, and inflammation in one eye. The image shows unilateral proptosis, which is consistent with the manifestations …
20190919	0	70	1	Physical Signs	D	Cold agglutinin disease	genetic_congenital_diseases	0.06	0.16	0.19	0.46	0.13	0.46	113394	1	1	1	D	Yes	No	D	Yes	Yes	D	Yes	Yes	Yes	Yes	Yes	2019-09-19	2025-04-10	https://www.nejm.org/image-challenge?ci=20190919&startFrom=281&startPage=15	A 70-year-old woman presented with a 1-week history of dizziness and generalized rash following the onset of a viral respiratory tract infection. On physical examination, she had a generalized, macular, nonblanching, purplish rash. What is the most likely diagnosis?_x000D__x000D__x000D_ _x000D__x000D__x000D_ A.Cutaneous larva migrans_x000D__x000D__x000D_ _x000D__x000D__x000D_ B.Erythema infectios…	**Correct answer: D. Cold agglutinin disease**_x000D__x000D__x000D_ _x000D__x000D__x000D_ ---_x000D__x000D__x000D_ _x000D__x000D__x000D_ ### **Clinical Reasoning:**_x000D__x000D__x000D_ _x000D__x000D__x000D_ The image shows a **reticular, violaceous, mottled pattern** across the skin of the back, which is consistent with **livedo reticularis** — a net-like discoloration due to impaired blood flow…	Based on the clinical image provided, the correct answer is:_x000D__x000D__x000D_ _x000D__x000D__x000D_ **D. Cold agglutinin disease**_x000D__x000D__x000D_ _x000D__x000D__x000D_ **Rationale for the selected diagnosis:**_x000D__x000D__x000D_ The image shows a distinctive reticular or net-like pattern of purplish-red discoloration (livedo reticularis pattern) across the patient's back and upper ext…	_x000D__x000D__x000D_ Answer: D (Cold agglutinin disease)_x000D__x000D__x000D_ Rationale_x000D__x000D__x000D_ Support for Cold agglutinin disease_x000D__x000D__x000D_ Clinical appearance: Cold agglutinin disease can present with a livedo - reticularis - like rash, which appears as a net - like, purplish discoloration of the skin. The image shows a widespread, net - like purplish rash on the back,…
20190926	0	46	1	Radiological	A	Synovial chondromatosis	neoplastic_diseases	0.52	0.12	0.15	0.12	0.1	0.52	69579	1	1	1	A	Yes	No	A	Yes	No	A	Yes	Yes	Yes	Yes	Yes	2019-09-26	2025-04-10	https://www.nejm.org/image-challenge?ci=20190926&startFrom=281&startPage=15	A 46-year-old woman presented to the clinic with a 3-month history of walking difficulty due to worsening knee pain. She had received a diagnosis of rheumatoid arthritis 12 years earlier but had received treatment inconsistently. On physical examination, she had nodular swelling and outward bowing of both knees. She had limited range of motion in her left shoulder and in both wrists and both knee…	**Correct answer: A. Synovial chondromatosis**_x000D__x000D__x000D_ _x000D__x000D__x000D_ ---_x000D__x000D__x000D_ _x000D__x000D__x000D_ ### **Rationale:**_x000D__x000D__x000D_ _x000D__x000D__x000D_ The provided **bilateral knee radiographs** show **numerous, well-circumscribed, intra-articular calcified bodies** with a characteristic **“ring-and-arc” chondroid calcification pattern**, particular…	Based on the X-ray image provided, I'll analyze this case and select the most appropriate diagnosis from the options._x000D__x000D__x000D_ _x000D__x000D__x000D_ **The correct answer is A. Synovial chondromatosis.**_x000D__x000D__x000D_ _x000D__x000D__x000D_ **Rationale for selecting synovial chondromatosis:**_x000D__x000D__x000D_ The X-ray shows bilateral knee joints with multiple small, round to…	Answer: A (Synovial chondromatosis)_x000D__x000D__x000D_ Rationale_x000D__x000D__x000D_ Support for Synovial chondromatosis_x000D__x000D__x000D_ X - ray appearance: Synovial chondromatosis is characterized by the presence of multiple, calcified or ossified nodules within the synovial cavity. The X - ray shows multiple, rounded, calcified densities around the knee joints, which is consistent with …
20191003	0	65	1	Radiological	D	Voriconazole-induced periostitis	drug_toxin_related_diseases	0.15	0.18	0.08	0.46	0.13	0.46	71612	1	1	1	D	Yes	No	D	Yes	Yes	D	Yes	No	Yes	Yes	Yes	2019-10-03	2025-04-10	https://www.nejm.org/image-challenge?ci=20191003&startFrom=281&startPage=15	A 65-year-old woman presented to the rheumatology service with complaints of progressive swelling in both hands and diffuse body pain. She had a history of lung transplantation 8 years earlier, and had received daily antifungal prophylaxis with voriconazole. On examination, there was prominent joint and soft-tissue swelling and pain in both hands, restricted range of motion in both shoulders, and…	**Correct Answer: D. Voriconazole-induced periostitis**_x000D__x000D__x000D_ _x000D__x000D__x000D_ ---_x000D__x000D__x000D_ _x000D__x000D__x000D_ ### **Clinical Reasoning:**_x000D__x000D__x000D_ _x000D__x000D__x000D_ The radiograph shows **diffuse, irregular, and exuberant periosteal reaction** involving the metacarpals and phalanges bilaterally. This pattern is **highly characteristic of voricon…	The correct answer is D. Voriconazole-induced periostitis._x000D__x000D__x000D_ _x000D__x000D__x000D_ Looking at these bilateral hand radiographs, there are several distinctive findings that point to voriconazole-induced periostitis:_x000D__x000D__x000D_ _x000D__x000D__x000D_ 1. Extensive periosteal reaction along the shafts of multiple phalanges and metacarpals in both hands_x000D__x000D__x000D_…	Answer: D (Voriconazole - induced periostitis)_x000D__x000D__x000D_ Rationale_x000D__x000D__x000D_ Support for Voriconazole - induced periostitis_x000D__x000D__x000D_ X - ray appearance: Voriconazole - induced periostitis can cause abnormal bone growth and periosteal reaction. The X - ray shows changes in the bones of the hands that are consistent with a periosteal reaction, such as new bone form…
20191010	1	64	1	Physical Signs	D	Pernicious anemia	genetic_congenital_diseases	0.14	0.1	0.08	0.57	0.12	0.57	83744	1	0	1	D	Yes	No	B	No	No	D	Yes	Yes	Yes	No	Yes	2019-10-10	2025-04-10	https://www.nejm.org/image-challenge?ci=20191010&startFrom=281&startPage=15	A 64-year-old man presented to the oral medicine clinic with a painful, smooth, red tongue and a burning sensation around his lips that had developed 6 months earlier. No deficits were found on neurologic examination. What is the most likely diagnosis?_x000D__x000D__x000D_ _x000D__x000D__x000D_ A.Oral lichen planus_x000D__x000D__x000D_ _x000D__x000D__x000D_ B.Sjögren's syndrome_x000D__x000D__x000…	**Correct Answer: D. Pernicious anemia**_x000D__x000D__x000D_ _x000D__x000D__x000D_ ---_x000D__x000D__x000D_ _x000D__x000D__x000D_ ### **Clinical Analysis:**_x000D__x000D__x000D_ _x000D__x000D__x000D_ The image shows a smooth, beefy, and erythematous tongue — a classic presentation of **glossitis**. The tongue appears atrophic with loss of papillae, particularly centrally and anteriorly. This pre…	Based on the clinical image showing the tongue, I'll analyze the five diagnostic options and provide my assessment._x000D__x000D__x000D_ _x000D__x000D__x000D_ The correct answer is: **B. Sjögren's syndrome**_x000D__x000D__x000D_ _x000D__x000D__x000D_ ## Rationale for selecting Sjögren's syndrome:_x000D__x000D__x000D_ The image shows a classic presentation of a dry, fissured tongue with atrophic c…	Answer: D (Pernicious anemia)_x000D__x000D__x000D_ Rationale_x000D__x000D__x000D_ Support for Pernicious anemia_x000D__x000D__x000D_ Clinical appearance: Pernicious anemia can cause glossitis, which is inflammation of the tongue. The image shows a smooth, shiny tongue, which is characteristic of atrophic glossitis seen in pernicious anemia. This condition is due to vitamin B12 deficiency, often r…
20191017	0	77	1	Radiological	B	Calcinosis	metabolic_nutritional_diseases	0.17	0.48	0.11	0.07	0.16	0.48	75590	0	1	1	A	No	No	B	Yes	No	B	Yes	Yes	No	Yes	Yes	2019-10-17	2025-04-10	https://www.nejm.org/image-challenge?ci=20191017&startFrom=281&startPage=15	A 77-year-old woman presented to a clinic with a 2-year history of slowly progressive, painful swelling of her fingertips. Physical examination of the hands showed thickening of the skin on her right hand as well as soft-tissue swelling of the tips of the fingers of both hands. A plain radiograph of the hands is shown. What is the most likely diagnosis?_x000D__x000D__x000D_ _x000D__x000D__x000D_ …	**Correct Answer: A. Tophaceous gout**_x000D__x000D__x000D_ _x000D__x000D__x000D_ ---_x000D__x000D__x000D_ _x000D__x000D__x000D_ ### **Rationale:**_x000D__x000D__x000D_ _x000D__x000D__x000D_ The provided **radiograph of both hands** shows:_x000D__x000D__x000D_ _x000D__x000D__x000D_ * Multiple, well-demarcated, **amorphous, dense soft tissue masses**, particularly affecting the distal phalanges an…	Based on the radiographic image of both hands, the correct answer is:_x000D__x000D__x000D_ _x000D__x000D__x000D_ **B. Calcinosis**_x000D__x000D__x000D_ _x000D__x000D__x000D_ ## Rationale for Calcinosis:_x000D__x000D__x000D_ _x000D__x000D__x000D_ The X-ray shows characteristic calcific deposits in the soft tissues around the fingertips, particularly prominent at the distal ends of several digits. …	_x000D__x000D__x000D_ Answer: B (Calcinosis)_x000D__x000D__x000D_ Rationale_x000D__x000D__x000D_ Support for Calcinosis_x000D__x000D__x000D_ X - ray appearance: Calcinosis is characterized by the deposition of calcium salts in the soft tissues. The X - ray shows calcified deposits at the tips of the fingers, which is consistent with the typical manifestation of calcinosis. This condition can occu…
20191024	0	36	1	Physical Signs	B	Rat bite fever	infectious_diseases	0.1	0.41	0.18	0.17	0.14	0.41	110619	1	1	1	B	Yes	No	B	Yes	Yes	B	Yes	Yes	Yes	Yes	Yes	2019-10-24	2025-04-10	https://www.nejm.org/image-challenge?ci=20191024&startFrom=281&startPage=15	A previously healthy 36-year-old woman presented to the infectious diseases clinic with a 3-day history of fever, arthralgias, myalgias, and headache. She denied any recent travel or new sexual partners but admitted to having a pet rat. Physical examination revealed swollen and tender joints as well as a maculopapular rash on the feet and hands, with pustule formation. What is the most likely dia…	**Correct Answer: B. Rat bite fever**_x000D__x000D__x000D_ _x000D__x000D__x000D_ ---_x000D__x000D__x000D_ _x000D__x000D__x000D_ ### **Clinical Analysis:**_x000D__x000D__x000D_ _x000D__x000D__x000D_ The provided images show a patient with **palmar and plantar maculopapular eruptions**, along with **targetoid or pustular lesions**, some of which appear hemorrhagic or vesicular. These findings, in c…	Based on the clinical images shown, I can see a distinctive rash pattern affecting the patient's foot and hands, with multiple erythematous papular lesions and what appear to be some pustular lesions, particularly on the fingers and toes._x000D__x000D__x000D_ _x000D__x000D__x000D_ The correct answer is: B. Rat bite fever_x000D__x000D__x000D_ _x000D__x000D__x000D_ Rationale for selecting Rat bite …	Answer: B (Rat bite fever)_x000D__x000D__x000D_ Rationale_x000D__x000D__x000D_ Support for Rat bite fever_x000D__x000D__x000D_ Clinical appearance: Rat bite fever can present with a rash that may include macules, papules, and pustules. The images show a rash with multiple small lesions on the hands and feet, which is consistent with the cutaneous manifestations of rat bite fever. This condition i…
20191031	1	52	1	Physical Signs	E	Acral lentiginous melanoma	neoplastic_diseases	0.04	0.13	0.08	0.13	0.62	0.62	60962	0	1	0	A	No	No	E	Yes	Yes	D	No	No	No	Yes	No	2019-10-31	2025-04-10	https://www.nejm.org/image-challenge?ci=20191031&startFrom=281&startPage=15	A 52-year old man presented to the clinic with a bleeding mass on his right great toe. Two months earlier, the patient had noticed a pink nodule on the dorsum of the toe. One month later, his toe was stepped on, after which the nodule grew rapidly and bled intermittently. On examination, the lesion was red and ulcerated with surrounding hyperpigmentation. What is the diagnosis?_x000D__x000D__x000…	**Correct answer: A. Tophaceous gout**_x000D__x000D__x000D_ _x000D__x000D__x000D_ ---_x000D__x000D__x000D_ _x000D__x000D__x000D_ ### **Clinical Reasoning:**_x000D__x000D__x000D_ _x000D__x000D__x000D_ The image shows a swollen and erythematous great toe with a prominent ulcerated lesion over the distal aspect. There is overlying skin breakdown with extrusion of a chalky-white and reddish material,…	Based on the clinical image provided, I'll analyze this case and select the most appropriate diagnosis from the options provided._x000D__x000D__x000D_ _x000D__x000D__x000D_ The correct answer is: E. Acral lentiginous melanoma_x000D__x000D__x000D_ _x000D__x000D__x000D_ Rationale for selecting acral lentiginous melanoma:_x000D__x000D__x000D_ The image shows a large, ulcerated, reddish-black nodular…	Answer: D (Subungual exostosis)_x000D__x000D__x000D_ Rationale_x000D__x000D__x000D_ Support for Subungual exostosis_x000D__x000D__x000D_ Clinical appearance: Subungual exostosis is a benign, bony growth that occurs under the nail. It typically presents as a painful, red, and sometimes ulcerated mass beneath the nail, which is consistent with the image. The lesion's location and appearance match t…
20191107	0	73	1	Physical Signs	B	Tripe palms	neoplastic_diseases	0.16	0.35	0.11	0.24	0.14	0.35	106183	1	1	1	B	Yes	No	B	Yes	No	B	Yes	Yes	Yes	Yes	Yes	2019-11-07	2025-04-10	https://www.nejm.org/image-challenge?ci=20191107&startFrom=281&startPage=15	A 73-year-old woman presented to the dermatology clinic with a 9-month history of pruritic and painful lesions on the palms of her hands. Physical examination showed sharp demarcation of the folds in the lines of her hands, a velvety appearance of palmar surfaces, and ridging of the skin. What is the most likely diagnosis?_x000D__x000D__x000D_ _x000D__x000D__x000D_ A.Palmarpsoriasis_x000D__x000D_…	**Correct Answer: B. Tripe palms**_x000D__x000D__x000D_ _x000D__x000D__x000D_ ---_x000D__x000D__x000D_ _x000D__x000D__x000D_ ### **Rationale:**_x000D__x000D__x000D_ _x000D__x000D__x000D_ The image shows a hand with thickened, velvety, rugose (folded) skin with an exaggerated dermatoglyphic pattern, most prominently on the palm. This distinct “corrugated” or “velvety” appearance is classically des…	I'll analyze this clinical image and determine the most likely diagnosis from the provided options._x000D__x000D__x000D_ _x000D__x000D__x000D_ The image shows a palm with notably thickened skin, particularly at the palmar creases. There is a yellowish discoloration and a velvety or rugose appearance of the palm, with exaggerated skin markings._x000D__x000D__x000D_ _x000D__x000D__x000D_ Based on t…	Answer: B (Tripe palms)_x000D__x000D__x000D_ Rationale_x000D__x000D__x000D_ Support for Tripe palms_x000D__x000D__x000D_ Clinical appearance: Tripe palms are characterized by a thickened, velvety, and furrowed appearance of the palms, resembling the texture of tripe. The image shows a palm with an abnormal, thickened texture that is consistent with the typical appearance of tripe palms. This cond…
20191114	1	22	1	Radiological	C	Redundant mitral valve	genetic_congenital_diseases	0.14	0.1	0.48	0.09	0.19	0.48	76022	0	0	0	E	No	No	E	No	No	E	No	No	No	No	No	2019-11-14	2025-04-10	https://www.nejm.org/image-challenge?ci=20191114&startFrom=281&startPage=15	A previously healthy 22-year-old man presented with a 6-month history of palpitations and chest discomfort. He denied any dyspnea or syncope. On examination, a midsystolic click was heard at the cardiac apex. An image from a transthoracic echocardiogram is shown. What is the most likely diagnosis?_x000D__x000D__x000D_ _x000D__x000D__x000D_ A.Infective endocarditis valvular vegetation_x000D__x000D…	**Correct Answer: E. Papillary fibroelastoma**_x000D__x000D__x000D_ _x000D__x000D__x000D_ ---_x000D__x000D__x000D_ _x000D__x000D__x000D_ ### **Diagnostic Reasoning:**_x000D__x000D__x000D_ _x000D__x000D__x000D_ The echocardiographic image provided shows a **small, mobile, pedunculated mass attached to the valvular surface**, likely the aortic or mitral valve. The mass appears highly echogenic and …	Based on the echocardiographic image provided, I'll analyze the cardiac findings and select the most appropriate diagnosis from the options._x000D__x000D__x000D_ _x000D__x000D__x000D_ ## The correct answer is E. Papillary fibroelastoma_x000D__x000D__x000D_ _x000D__x000D__x000D_ ### Rationale for selecting Papillary fibroelastoma:_x000D__x000D__x000D_ The echocardiogram shows a small, well-circums…	Answer: E (Papillary fibroelastoma)_x000D__x000D__x000D_ Rationale_x000D__x000D__x000D_ Support for Papillary fibroelastoma_x000D__x000D__x000D_ Echocardiogram appearance: Papillary fibroelastomas are small, usually < 1 cm, mobile, and often attached to the heart valves. They appear as small, well - defined masses on echocardiography. The image shows a small, distinct mass in the heart, which is …
20191121	0	<1	1	Physical Signs	D	Congenital syphilis	infectious_diseases	0.11	0.05	0.18	0.45	0.2	0.45	78549	1	0	0	D	Yes	No	C	No	Unknown	_	No	No	Yes	No	0	2019-11-21	2025-04-10	https://www.nejm.org/image-challenge?ci=20191121&startFrom=281&startPage=15	A 6-month-old girl was referred to the hospital for evaluation and treatment of a perirectal mass which had first been noted at 2 weeks of age. Physical examination showed frontal bossing but no rash, hepatosplenomegaly, lymphadenopathy, or limitation of limb movement. A lateral radiograph of the right tibia showed severe periostitis. What is the diagnosis?_x000D__x000D__x000D_ _x000D__x000D__x00…	**Correct answer: D. Congenital syphilis**_x000D__x000D__x000D_ _x000D__x000D__x000D_ ---_x000D__x000D__x000D_ _x000D__x000D__x000D_ ### **Clinical Analysis:**_x000D__x000D__x000D_ _x000D__x000D__x000D_ The image shows a perianal lesion in an infant, characterized by an ulcerated, erythematous, and exudative mass with yellowish discharge. This presentation is concerning for an infectious etiology…	Based on the clinical image provided, I'll analyze the most likely diagnosis among the options presented._x000D__x000D__x000D_ _x000D__x000D__x000D_ The correct answer is: C. Perianal hamartomatous polyps_x000D__x000D__x000D_ _x000D__x000D__x000D_ Rationale for selecting perianal hamartomatous polyps:_x000D__x000D__x000D_ The image shows a yellowish-white, raised, well-circumscribed lesion in the…	Sorry, I can't answer this question. Please modify it and try again. If you need any other information or have other questions, I will do my best to assist you.
20191128	0	84	1	Physical Signs	C	Merkel-cell carcinoma	neoplastic_diseases	0.18	0.1	0.43	0.06	0.23	0.43	96977	0	1	0	E	No	No	C	Yes	Unknown	E	No	No	No	Yes	No	2019-11-28	2025-04-10	https://www.nejm.org/image-challenge?ci=20191128&startFrom=281&startPage=15	An 84-year-old woman presented with a painless red nodule over the base of the fourth finger on her right hand. The nodule developed rapidly over the course of 1 month and the patient denied trauma to the area or other lesions. What is the most likely diagnosis?_x000D__x000D__x000D_ _x000D__x000D__x000D_ A.Basal-cell carcinoma_x000D__x000D__x000D_ _x000D__x000D__x000D_ B.Sporotrichosis_x000D__x00…	**Correct answer: E. Pyogenic granuloma**_x000D__x000D__x000D_ _x000D__x000D__x000D_ ---_x000D__x000D__x000D_ _x000D__x000D__x000D_ ### **Rationale:**_x000D__x000D__x000D_ _x000D__x000D__x000D_ The lesion depicted on the dorsal aspect of the finger is:_x000D__x000D__x000D_ _x000D__x000D__x000D_ * A well-circumscribed, dome-shaped, red, shiny, friable nodule._x000D__x000D__x000D_ * It appears vasc…	Based on the clinical image provided, the most likely diagnosis is:_x000D__x000D__x000D_ _x000D__x000D__x000D_ **C. Merkel-cell carcinoma**_x000D__x000D__x000D_ _x000D__x000D__x000D_ ## Rationale for selecting Merkel-cell carcinoma:_x000D__x000D__x000D_ _x000D__x000D__x000D_ The image shows a dome-shaped, reddish-purple, shiny nodule on what appears to be the dorsum of an elderly person's hand. T…	Answer: E (Pyogenic granuloma)_x000D__x000D__x000D_ Rationale_x000D__x000D__x000D_ Support for Pyogenic granuloma_x000D__x000D__x000D_ Clinical appearance: Pyogenic granuloma typically presents as a rapidly growing, red, pedunculated or sessile nodule. The image shows a red, dome - shaped lesion on the finger, which is consistent with the typical appearance of a pyogenic granuloma. These lesions …
20191205	0	<1	1	Physical Signs	A	Hydrocolpos	genetic_congenital_diseases	0.45	0.19	0.17	0.11	0.08	0.45	124199	1	1	1	A	Yes	Yes	A	Yes	No	A	Yes	Yes	Yes	Yes	Yes	2019-12-05	2025-04-10	https://www.nejm.org/image-challenge?ci=20191205&startFrom=261&startPage=14	Physical examination of a 1-day-old girl born at 36 weeks of gestation revealed a soft mass protruding from the external genitalia. The mass was noted to increase in size when the infant cried. The physical examination was otherwise normal. What is the diagnosis?_x000D__x000D__x000D_ _x000D__x000D__x000D_ A.Hydrocolpos_x000D__x000D__x000D_ _x000D__x000D__x000D_ B.Prolapsed uterus_x000D__x000D__x0…	**Correct Answer: A. Hydrocolpos**_x000D__x000D__x000D_ _x000D__x000D__x000D_ ---_x000D__x000D__x000D_ _x000D__x000D__x000D_ ### **Diagnosis and Rationale:**_x000D__x000D__x000D_ _x000D__x000D__x000D_ The image shows a newborn or infant with a **bulging, cystic mass protruding from the vaginal introitus**, which is smooth, midline, and has a yellowish hue, suggesting fluid accumulation behind an …	Based on the provided image, I can see what appears to be a protrusion or mass in the genital area, likely of an infant or young child. I'll analyze each potential diagnosis and provide my assessment._x000D__x000D__x000D_ _x000D__x000D__x000D_ The correct answer is: A. Hydrocolpos_x000D__x000D__x000D_ _x000D__x000D__x000D_ Rationale for selecting Hydrocolpos:_x000D__x000D__x000D_ Hydrocolpos refe…	_x000D__x000D__x000D_ Answer: A (Hydrocolpos)_x000D__x000D__x000D_ Rationale_x000D__x000D__x000D_ Support for Hydrocolpos_x000D__x000D__x000D_ Clinical appearance: Hydrocolpos is the accumulation of fluid in the vagina, often presenting as a bulge or swelling in the perineal area. The image shows a cystic - appearing structure in the perineal region, which is consistent with the typical presentat…
20191212	1	51	1	Physical Signs	E	Mycobacterial tenosynovitis due toMycobacterium avium complex	infectious_diseases	0.13	0.11	0.09	0.24	0.43	0.43	77204	0	1	0	D	No	No	E	Yes	Yes	D	No	No	No	Yes	No	2019-12-12	2025-04-10	https://www.nejm.org/image-challenge?ci=20191212&startFrom=261&startPage=14	A 51-year-old man with history of type 2 diabetes and human immunodeficiency virus infection presented with a 3-year history of worsening swelling of the left wrist associated with pain and numbness in the fingers. Physical examination was notable for an extension deficit in the proximal interphalangeal joint of all four fingers. Magnetic resonance imaging (MRI) showed multiple loose bodies in th…	**Correct Answer: D. Fibrolipomatous hamartoma of ulnar nerve**_x000D__x000D__x000D_ _x000D__x000D__x000D_ ---_x000D__x000D__x000D_ _x000D__x000D__x000D_ ### **Rationale:**_x000D__x000D__x000D_ _x000D__x000D__x000D_ The intraoperative image shows a characteristic "cable-like" or "spaghetti-like" appearance of a nerve (here, the **ulnar nerve**) with fibrofatty overgrowth interspersed among fascic…	Based on the surgical image provided, the most likely diagnosis is:_x000D__x000D__x000D_ _x000D__x000D__x000D_ **E. Mycobacterial tenosynovitis due to Mycobacterium avium complex**_x000D__x000D__x000D_ _x000D__x000D__x000D_ ## Rationale for Mycobacterial tenosynovitis_x000D__x000D__x000D_ _x000D__x000D__x000D_ The image shows an intraoperative finding of multiple yellowish-white granular structur…	Answer: D (Fibrolipomatous hamartoma of ulnar nerve)_x000D__x000D__x000D_ Rationale_x000D__x000D__x000D_ Support for Fibrolipomatous hamartoma of ulnar nerve_x000D__x000D__x000D_ Gross appearance: Fibrolipomatous hamartoma of the ulnar nerve is characterized by a fatty, lobulated mass within or adjacent to a nerve. The image shows a mass with a fatty - like appearance in the vicinity of a nerve, …
20191219	0	74	1	Physical Signs	C	Hereditary hemorrhagic telangiectasia	genetic_congenital_diseases	0.23	0.07	0.41	0.13	0.14	0.41	105769	1	0	0	C	Yes	No	D	No	No	D	No	No	Yes	No	No	2019-12-19	2025-04-10	https://www.nejm.org/image-challenge?ci=20191219&startFrom=261&startPage=14	A 74-year-old woman was hospitalized with sudden-onset weakness on the left side due to an acute infarct of the right middle cerebral artery. Examination of the oral mucosa and hands demonstrated the following lesions. What is the most likely diagnosis?_x000D__x000D__x000D_ _x000D__x000D__x000D_ A.Infective endocarditis_x000D__x000D__x000D_ _x000D__x000D__x000D_ B.Scleroderma_x000D__x000D__x000D_…	**Correct answer: C. Hereditary hemorrhagic telangiectasia (HHT)**_x000D__x000D__x000D_ _x000D__x000D__x000D_ ---_x000D__x000D__x000D_ _x000D__x000D__x000D_ ### **Rationale:**_x000D__x000D__x000D_ _x000D__x000D__x000D_ The images show **multiple small red macules and papules** on the lips and fingers. These lesions are consistent with **telangiectasias**, which are hallmark features of **Heredita…	Based on the clinical images provided, the most likely diagnosis is:_x000D__x000D__x000D_ _x000D__x000D__x000D_ **D. Levamisole-induced vasculitis**_x000D__x000D__x000D_ _x000D__x000D__x000D_ ## Rationale for Levamisole-induced vasculitis:_x000D__x000D__x000D_ _x000D__x000D__x000D_ The images show characteristic findings of levamisole-induced vasculitis including:_x000D__x000D__x000D_ _x000D__x00…	Answer: D (Levamisole - induced vasculitis)_x000D__x000D__x000D_ Rationale_x000D__x000D__x000D_ Support for Levamisole - induced vasculitis_x000D__x000D__x000D_ Clinical appearance: Levamisole - induced vasculitis can present with characteristic cutaneous manifestations, including purpuric lesions. The images show purpuric spots on the tongue and fingers, which are consistent with the skin findin…
20191226	0	19	1	Endoscopic	C	Fallopian tube torsion	traumatic_physical_diseases	0.2	0.19	0.38	0.11	0.12	0.38	88641	1	1	0	C	Yes	No	C	Yes	No	A	No	No	Yes	Yes	No	2019-12-26	2025-04-10	https://www.nejm.org/image-challenge?ci=20191226&startFrom=261&startPage=14	A 19-year-old woman presented to the emergency department with severe abdominal pain that had started 9 hours earlier. Rebound tenderness was present in the suprapubic and left iliac fossa regions on physical examination. A urine test for beta human chorionic gonadotropin was negative. A diagnostic laparoscopy was performed. What is the diagnosis?_x000D__x000D__x000D_ _x000D__x000D__x000D_ A.Ovar…	**Correct answer: C. Fallopian tube torsion**_x000D__x000D__x000D_ _x000D__x000D__x000D_ ---_x000D__x000D__x000D_ _x000D__x000D__x000D_ ### **Rationale:**_x000D__x000D__x000D_ _x000D__x000D__x000D_ The laparoscopic image shows a markedly engorged, edematous, and dusky (violaceous) tubular structure with a twisted pedicle—classic for **fallopian tube torsion**. The ovary appears separate and not i…	Based on the endoscopic image provided, I believe the correct diagnosis is:_x000D__x000D__x000D_ _x000D__x000D__x000D_ **C. Fallopian tube torsion**_x000D__x000D__x000D_ _x000D__x000D__x000D_ ## Rationale for choosing Fallopian tube torsion:_x000D__x000D__x000D_ _x000D__x000D__x000D_ The image shows a laparoscopic view of what appears to be a twisted, congested tubular structure with a bluish-pur…	Answer: A (Ovarian torsion)_x000D__x000D__x000D_ Rationale_x000D__x000D__x000D_ Support for Ovarian torsion_x000D__x000D__x000D_ Anatomical appearance: Ovarian torsion involves the rotation of the ovary around its vascular pedicle. The image shows a twisted, enlarged, and potentially ischemic - appearing structure in the pelvic region, which is consistent with the typical appearance of an ovary a…
20200102	1	19	1	Physical Signs	B	Cutaneous leishmaniasis	infectious_diseases	0.08	0.65	0.04	0.06	0.17	0.65	98775	1	1	1	B	Yes	No	B	Yes	Yes	B	Yes	Yes	Yes	Yes	Yes	2020-01-02	2025-04-10	https://www.nejm.org/image-challenge?ci=20200102&startFrom=261&startPage=14	A 19-year-old man presented to the dermatology clinic with a 3-month history of an enlarging ulcer on his right hand and multiple tender subcutaneous nodules on the right forearm and elbow. Five months earlier, he had traveled to Ecuador, and worked on an organic produce farm. On physical examination, the ulcer measured 3 cm in diameter and was tender with a firm border. What is the most likely d…	**Correct answer: B. Cutaneous leishmaniasis**_x000D__x000D__x000D_ _x000D__x000D__x000D_ ---_x000D__x000D__x000D_ _x000D__x000D__x000D_ ### **Rationale:**_x000D__x000D__x000D_ _x000D__x000D__x000D_ The image shows a well-demarcated ulcer with a raised, indurated border and a central area of necrosis and granulation tissue, located on the dorsum of the hand. This lesion is **characteristic of cut…	Based on the clinical image provided, the most likely diagnosis is:_x000D__x000D__x000D_ _x000D__x000D__x000D_ **B. Cutaneous leishmaniasis**_x000D__x000D__x000D_ _x000D__x000D__x000D_ ### Rationale for selecting cutaneous leishmaniasis:_x000D__x000D__x000D_ The image shows a classic presentation of cutaneous leishmaniasis with the following characteristic features:_x000D__x000D__x000D_ - A well-…	Answer: B (Cutaneous leishmaniasis)_x000D__x000D__x000D_ Rationale_x000D__x000D__x000D_ Support for Cutaneous leishmaniasis_x000D__x000D__x000D_ Clinical appearance: Cutaneous leishmaniasis typically presents as a painless ulcer with a raised, erythematous border and a granulating base, which is consistent with the lesion seen in the image. The disease is caused by Leishmania parasites and is tra…
20200109	1	81	1	Physical Signs	D	Amiodarone-induced skin discoloration	drug_toxin_related_diseases	0.1	0.07	0.07	0.71	0.05	0.71	67523	0	1	1	C	No	No	D	Yes	Yes	D	Yes	No	No	Yes	Yes	2020-01-09	2025-04-10	https://www.nejm.org/image-challenge?ci=20200109&startFrom=261&startPage=14	An 81-year-old man with a history of atrial fibrillation and hypertension presented to the emergency department after a fall. His medications were apixaban, ramipril, bisoprolol, amlodipine, and amiodarone. Physical examination showed discoloration of his nose, cheeks, and forehead. What is the most likely diagnosis?_x000D__x000D__x000D_ _x000D__x000D__x000D_ AMethemoglobinemia_x000D__x000D__x000…	**Correct Answer: C. Silver toxicity**_x000D__x000D__x000D_ _x000D__x000D__x000D_ ---_x000D__x000D__x000D_ _x000D__x000D__x000D_ ### **Rationale:**_x000D__x000D__x000D_ _x000D__x000D__x000D_ The image shows a man with a diffuse, bluish-gray discoloration of the face, especially prominent on the nose, forehead, and periorbital areas. This type of pigmentation is characteristic of **argyria**, a co…	Based on the clinical image provided, I'll analyze the most likely diagnosis from the options given._x000D__x000D__x000D_ _x000D__x000D__x000D_ The correct answer is: D. Amiodarone-induced skin discoloration_x000D__x000D__x000D_ _x000D__x000D__x000D_ Rationale for selecting option D:_x000D__x000D__x000D_ The image shows an elderly patient with a distinctive blue-gray discoloration of the skin, pa…	Answer: D (Amiodarone - induced skin discoloration)_x000D__x000D__x000D_ Rationale_x000D__x000D__x000D_ Support for Amiodarone - induced skin discoloration_x000D__x000D__x000D_ Clinical appearance: Amiodarone is a medication used for treating cardiac arrhythmias, and one of its side effects is skin discoloration. The image shows a bluish - gray discoloration of the skin on the face, which is cons…
20200116	1	57	1	Physical Signs	E	Fluorouracil side effect	drug_toxin_related_diseases	0.1	0.15	0.1	0.09	0.59	0.59	87933	0	0	0	C	No	No	C	No	No	C	No	No	No	No	No	2020-01-16	2025-04-10	https://www.nejm.org/image-challenge?ci=20200116&startFrom=261&startPage=14	A 57-year-old man with stage 3b colon cancer on adjuvant chemotherapy noticed progressive darkening of his palms that was not associated with redness, scaling, or pain. The plantar aspects of his feet were minimally affected but the remainder of his skin was normal. What is the diagnosis?_x000D__x000D__x000D_ _x000D__x000D__x000D_ A.Addison’s disease_x000D__x000D__x000D_ _x000D__x000D__x000D_ B.S…	**Correct answer: C. Ochronosis**_x000D__x000D__x000D_ _x000D__x000D__x000D_ ---_x000D__x000D__x000D_ _x000D__x000D__x000D_ ### **Diagnostic Reasoning:**_x000D__x000D__x000D_ _x000D__x000D__x000D_ The image shows both palms exhibiting a striking **bluish-black hyperpigmentation** with a **waxy texture**, especially involving the creases. These findings, particularly involving the **palms** (and t…	Based on the clinical image provided, the correct answer is:_x000D__x000D__x000D_ _x000D__x000D__x000D_ **C. Ochronosis**_x000D__x000D__x000D_ _x000D__x000D__x000D_ **Rationale for selecting Ochronosis:**_x000D__x000D__x000D_ The image shows characteristic diffuse, dark blue-gray to brown-black hyperpigmentation of the hands, particularly prominent on the palms. This is consistent with ochronosis…	Answer: C (Ochronosis)_x000D__x000D__x000D_ Rationale_x000D__x000D__x000D_ Support for Ochronosis_x000D__x000D__x000D_ Clinical appearance: Ochronosis is characterized by a dark, blue - black discoloration of the skin, often affecting areas like the hands. The image shows dark - colored hands, which is consistent with the typical skin discoloration seen in ochronosis. This condition is due to the…
20200123	1	<1	1	Physical Signs	C	Infant harlequin syndrome	genetic_congenital_diseases	0.11	0.18	0.41	0.17	0.14	0.41	83490	1	1	1	C	Yes	No	C	Yes	No	C	Yes	No	Yes	Yes	Yes	2020-01-23	2025-04-10	https://www.nejm.org/image-challenge?ci=20200123&startFrom=261&startPage=14	A male neonate with an antenatal diagnosis of Ebstein’s anomaly had respiratory distress with low oxygen saturation immediately after birth at 35 weeks of gestation. He was intubated and received infusions of alprostadil and dobutamine. On the third day of life, a clearly demarcated erythema developed on one side of the body as shown in the image. During this episode, the physical examination was…	**Correct answer: C. Infant harlequin syndrome**_x000D__x000D__x000D_ _x000D__x000D__x000D_ ---_x000D__x000D__x000D_ _x000D__x000D__x000D_ ### **Clinical Reasoning:**_x000D__x000D__x000D_ _x000D__x000D__x000D_ The image shows a distinct **sharp, midline demarcation** of skin color on the trunk of a neonate — one side appears flushed/erythematous, while the other side remains pale. This presentati…	Based on the clinical image provided, the correct answer is:_x000D__x000D__x000D_ _x000D__x000D__x000D_ **C. Infant harlequin syndrome**_x000D__x000D__x000D_ _x000D__x000D__x000D_ ## Rationale for Infant harlequin syndrome:_x000D__x000D__x000D_ _x000D__x000D__x000D_ The image shows a distinct demarcation line across the infant's torso with a clear color difference - one side of the body appears r…	Answer: C (Infant harlequin syndrome)_x000D__x000D__x000D_ Rationale_x000D__x000D__x000D_ Support for Infant harlequin syndrome_x000D__x000D__x000D_ Clinical appearance: Infant harlequin syndrome is characterized by a transient, unilateral flushing of the skin, often accompanied by dilation of blood vessels. The image shows unilateral skin redness in an infant, which is consistent with the typica…
20200130	1	53	1	Physical Signs	B	Lymphoma	neoplastic_diseases	0.23	0.29	0.19	0.17	0.12	0.29	132399	0	0	0	C	No	No	C	No	No	C	No	No	No	No	No	2020-01-30	2025-04-10	https://www.nejm.org/image-challenge?ci=20200130&startFrom=261&startPage=14	A 53-year-old man presented to the emergency department with a 1-month history of relapsing fevers, dyspnea, and rapidly progressive skin lesions. Physical examination revealed painful, indurated nodules with surrounding purple discoloration on his back, trunk, and limbs. What is the most likely diagnosis?_x000D__x000D__x000D_ _x000D__x000D__x000D_ A.Polyarteritis nodosa vasculitis_x000D__x000D__…	**Correct Answer: C. Ecthyma gangrenosum**_x000D__x000D__x000D_ _x000D__x000D__x000D_ ---_x000D__x000D__x000D_ _x000D__x000D__x000D_ ### **Diagnostic Reasoning:**_x000D__x000D__x000D_ _x000D__x000D__x000D_ The clinical image shows multiple **necrotic skin lesions** with surrounding erythema and violaceous discoloration, several of which have black eschars and ulceration, in a patient likely to be…	Based on the clinical image provided, I'll analyze the possible diagnoses:_x000D__x000D__x000D_ _x000D__x000D__x000D_ ## The correct answer is C. Ecthyma gangrenosum_x000D__x000D__x000D_ _x000D__x000D__x000D_ ### Rationale for selecting Ecthyma gangrenosum:_x000D__x000D__x000D_ The image shows multiple skin lesions with characteristic features of ecthyma gangrenosum: purpuric macules that have ev…	Answer: C (Ecthyma gangrenosum)_x000D__x000D__x000D_ Rationale_x000D__x000D__x000D_ Support for Ecthyma gangrenosum_x000D__x000D__x000D_ Clinical appearance: Ecthyma gangrenosum is characterized by the presence of hemorrhagic, necrotic skin lesions, often with a central eschar. The image shows multiple, dark - centered, hemorrhagic lesions on the skin, which is consistent with the typical appeara…
20200206	0	73	1	Radiological	A	Sublingual epidermoid cyst	neoplastic_diseases	0.48	0.13	0.15	0.1	0.14	0.48	74745	1	1	1	A	Yes	No	A	Yes	Yes	A	Yes	Yes	Yes	Yes	Yes	2020-02-06	2025-04-10	https://www.nejm.org/image-challenge?ci=20200206&startFrom=261&startPage=14	A 73-year-old woman presented to the emergency department with difficulty in speaking, which had progressively worsened over a period of 4 days. Physical examination showed a large, fluctuant, painless swelling of the anterior floor of the mouth. Contrast-enhanced computed tomography of the neck is shown. What is the diagnosis?_x000D__x000D__x000D_ _x000D__x000D__x000D_ A.Sublingual epidermoid cy…	**Correct answer: A. Sublingual epidermoid cyst**_x000D__x000D__x000D_ _x000D__x000D__x000D_ ### **Diagnostic reasoning:**_x000D__x000D__x000D_ _x000D__x000D__x000D_ The provided CT images (axial and sagittal views) show a **well-circumscribed, non-enhancing, low-attenuation, unilocular midline cystic lesion** in the **floor of the mouth**, displacing the tongue superiorly. This radiologic appear…	Based on the provided CT image, I can see an axial (cross-sectional) view of the neck/lower face region with an apparent mass or enlargement in what appears to be the sublingual or floor of mouth region. Let me analyze each option carefully._x000D__x000D__x000D_ _x000D__x000D__x000D_ The correct answer is: **A. Sublingual epidermoid cyst**_x000D__x000D__x000D_ _x000D__x000D__x000D_ **Rationale fo…	Answer: A (Sublingual epidermoid cyst)_x000D__x000D__x000D_ Rationale_x000D__x000D__x000D_ Support for Sublingual epidermoid cyst_x000D__x000D__x000D_ Imaging appearance: The CT scan shows a well - defined, cystic - appearing structure in the sublingual region. Sublingual epidermoid cysts are typically benign, slow - growing lesions that present as well - circumscribed, fluid - filled masses in t…
20200213	0	74	1	Radiological	D	Intestinal lipomatosis	metabolic_nutritional_diseases	0.19	0.12	0.24	0.37	0.08	0.37	99004	0	0	0	C	No	No	C	No	No	C	No	No	No	No	No	2020-02-13	2025-04-10	https://www.nejm.org/image-challenge?ci=20200213&startFrom=261&startPage=14	A 74-year-old woman presented to the gastroenterology clinic with a long history of bloating and abdominal distention. On physical examination, the abdomen was found to be distended but was nontender on palpation, with normal bowel sounds. This image shows findings on computed tomography of the abdomen and pelvis. What is the most likely diagnosis?_x000D__x000D__x000D_ _x000D__x000D__x000D_ A.Dif…	**Correct answer: C. Pneumatosis cystoides intestinalis**_x000D__x000D__x000D_ _x000D__x000D__x000D_ ---_x000D__x000D__x000D_ _x000D__x000D__x000D_ ### **Rationale:**_x000D__x000D__x000D_ _x000D__x000D__x000D_ The CT image provided shows multiple round, gas-filled cystic structures predominantly within the **wall of the bowel**, giving a characteristic **“bubble-like” or “grape-cluster” appearanc…	Based on the provided CT image of the abdomen, the correct answer is:_x000D__x000D__x000D_ _x000D__x000D__x000D_ **C. Pneumatosis cystoides intestinalis**_x000D__x000D__x000D_ _x000D__x000D__x000D_ ## Rationale for correct answer:_x000D__x000D__x000D_ The image shows multiple gas-filled cystic lesions within the wall of the intestine, which is the hallmark finding of pneumatosis cystoides intesti…	_x000D__x000D__x000D_ Answer: C (Pneumatosis cystoides intestinalis)_x000D__x000D__x000D_ Rationale_x000D__x000D__x000D_ Support for Pneumatosis cystoides intestinalis_x000D__x000D__x000D_ Imaging appearance: Pneumatosis cystoides intestinalis is characterized by the presence of multiple gas - filled cysts within the intestinal wall. The CT scan shows numerous cyst - like structures in the abdomi…
20200220	1	66	1	Pathological	B	Angiosarcoma	neoplastic_diseases	0.13	0.37	0.21	0.13	0.17	0.37	146388	1	0	0	B	Yes	No	D	No	No	A	No	No	Yes	No	No	2020-02-20	2025-04-10	https://www.nejm.org/image-challenge?ci=20200220&startFrom=261&startPage=14	A 66-year-old man presented to the emergency department with a 4-day history of shortness of breath and swelling in the legs along with recent fatigue and a 15-kg weight loss. Over the course of hospitalization, the patient developed hemodynamic instability and, despite receiving maximal supportive therapy, died in the intensive care unit. Gross pathological examination of the heart is shown. Wha…	**Correct Answer: B. Angiosarcoma**_x000D__x000D__x000D_ _x000D__x000D__x000D_ ---_x000D__x000D__x000D_ _x000D__x000D__x000D_ ### **Rationale:**_x000D__x000D__x000D_ _x000D__x000D__x000D_ This gross pathological image shows a **transverse section of the heart** with extensive **multifocal hemorrhagic nodules** infiltrating the myocardium and pericardial surface. The masses are **dark red to purpl…	Based on the gross pathology image of the heart, the correct answer is:_x000D__x000D__x000D_ _x000D__x000D__x000D_ **D. Chronic Chagas' heart disease**_x000D__x000D__x000D_ _x000D__x000D__x000D_ ### Rationale for this diagnosis:_x000D__x000D__x000D_ _x000D__x000D__x000D_ The image shows a cross-section of a heart with characteristic features of chronic Chagas' cardiomyopathy:_x000D__x000D__x000D_…	Answer: A (Staphylococcus aureus septic emboli)_x000D__x000D__x000D_ Rationale_x000D__x000D__x000D_ Support for Staphylococcus aureus septic emboli_x000D__x000D__x000D_ Gross appearance: The image shows multiple, discrete, hemorrhagic and necrotic lesions in the heart. Staphylococcus aureus septic emboli can travel through the bloodstream and lodge in the heart, causing such focal areas of infect…
20200227	1	42	1	Radiological	D	Granulomatosis with polyangiitis	immune_mediated_diseases	0.08	0.2	0.11	0.49	0.12	0.49	83698	1	1	1	D	Yes	No	D	Yes	No	D	Yes	No	Yes	Yes	Yes	2020-02-27	2025-04-10	https://www.nejm.org/image-challenge?ci=20200227&startFrom=261&startPage=14	A 42-year-old man presented to the clinic with a 3-month history of worsening cough, shortness of breath, and fever. Physical examination showed inflamed nasal mucosa and nasal crusting. Wheezes and rales were heard on auscultation. A computed tomographic scan of the face showed extensive destruction of the structural bones of the midface, resulting in a large nasal cavity. What is the diagnosis?…	**Correct Answer: D. Granulomatosis with polyangiitis**_x000D__x000D__x000D_ _x000D__x000D__x000D_ ---_x000D__x000D__x000D_ _x000D__x000D__x000D_ ### **Rationale:**_x000D__x000D__x000D_ _x000D__x000D__x000D_ The provided coronal CT scan of the paranasal sinuses demonstrates *destruction of the nasal septum and adjacent bony structures*, with resultant communication between the nasal cavities and …	I've reviewed the CT scan image showing the nasal and sinus structures. Based on the radiographic findings, I can provide my diagnosis and rationale._x000D__x000D__x000D_ _x000D__x000D__x000D_ ## Answer: D. Granulomatosis with polyangiitis_x000D__x000D__x000D_ _x000D__x000D__x000D_ ### Rationale for Selection_x000D__x000D__x000D_ The CT image demonstrates complete destruction/absence of the nasal…	_x000D__x000D__x000D_ Answer: D (Granulomatosis with polyangiitis)_x000D__x000D__x000D_ Rationale_x000D__x000D__x000D_ Support for Granulomatosis with polyangiitis_x000D__x000D__x000D_ Imaging appearance: Granulomatosis with polyangiitis (GPA), formerly known as Wegener's granulomatosis, is a vasculitis that can affect the nasal cavity and sinuses. The CT scan shows destruction of the nasal septu…
20200305	1	29	1	Radiological	C	Disseminated Mycobacterium avium–intracellulare infection	infectious_diseases	0.29	0.1	0.42	0.04	0.14	0.42	85136	1	0	0	C	Yes	Yes	B	No	No	A	No	No	Yes	No	No	2020-03-05	2025-04-10	https://www.nejm.org/image-challenge?ci=20200305&startFrom=261&startPage=14	A 29-year-old man with perinatally acquired human immunodeficiency virus (HIV) infection and intermittent adherence to antiretroviral therapy presented to the hospital with abdominal pain and drenching night sweats. On presentation, his CD4 count was 18 cells per cubic millimeter (reference range, 500 to 1500), and the HIV viral load was undetectable. Physical exam showed severe abdominal distent…	**Correct Answer: C. Disseminated *Mycobacterium avium–intracellulare* infection**_x000D__x000D__x000D_ _x000D__x000D__x000D_ ---_x000D__x000D__x000D_ _x000D__x000D__x000D_ ### **Rationale:**_x000D__x000D__x000D_ _x000D__x000D__x000D_ This is a coronal contrast-enhanced CT image of the abdomen showing numerous low-attenuation lesions throughout the liver and spleen, along with lymphadenopathy in …	Looking at this abdominal CT image, I can see significant abnormalities in the liver and spleen. Let me analyze the findings and select the most likely diagnosis from the options provided._x000D__x000D__x000D_ _x000D__x000D__x000D_ The correct answer is: **B. Wandering spleen**_x000D__x000D__x000D_ _x000D__x000D__x000D_ **Rationale for selecting Wandering spleen:**_x000D__x000D__x000D_ The CT ima…	Answer: A (HIV - associated diffuse large B - cell lymphoma)_x000D__x000D__x000D_ Rationale_x000D__x000D__x000D_ Support for HIV - associated diffuse large B - cell lymphoma_x000D__x000D__x000D_ Imaging appearance: The CT scan shows enlarged lymph nodes and potential masses in the abdominal cavity. In patients with HIV, diffuse large B - cell lymphoma is a common opportunistic malignancy. The ima…
20200312	1	19	1	Radiological	A	X-linked retinoschisis	genetic_congenital_diseases	0.45	0.15	0.12	0.12	0.17	0.45	59437	1	1	1	A	Yes	No	A	Yes	No	A	Yes	No	Yes	Yes	Yes	2020-03-12	2025-04-10	https://www.nejm.org/image-challenge?ci=20200312&startFrom=261&startPage=14	A 19-year-old man presented with a 3-day history of worsening vision in his right eye. He had previously presented at 5 years of age with reduced visual acuity and macular cystic degeneration in both eyes. Examination of the right fundus is shown. Optical coherence tomography revealed a full-thickness retinal detachment. What is the underlying condition?_x000D__x000D__x000D_ _x000D__x000D__x000D_…	**Correct Answer: A. X-linked retinoschisis**_x000D__x000D__x000D_ _x000D__x000D__x000D_ ---_x000D__x000D__x000D_ _x000D__x000D__x000D_ ### **Rationale:**_x000D__x000D__x000D_ _x000D__x000D__x000D_ The image depicts:_x000D__x000D__x000D_ _x000D__x000D__x000D_ * A **fundus photograph** showing **spoke-wheel or cartwheel-like folds** in the macular region, which is pathognomonic for **foveal schisi…	I'll analyze this ophthalmologic case based on the fundus photograph and OCT image provided._x000D__x000D__x000D_ _x000D__x000D__x000D_ The correct answer is: **A. X-linked retinoschisis**_x000D__x000D__x000D_ _x000D__x000D__x000D_ ## Rationale for X-linked retinoschisis:_x000D__x000D__x000D_ _x000D__x000D__x000D_ The images show classic findings of X-linked retinoschisis (XLRS):_x000D__x000D__x0…	Answer: A (X - linked retinoschisis)_x000D__x000D__x000D_ Rationale_x000D__x000D__x000D_ Support for X - linked retinoschisis_x000D__x000D__x000D_ Imaging appearance: X - linked retinoschisis is characterized by splitting of the retina layers. The fundus photograph shows a characteristic macular appearance, and the optical coherence tomography (OCT) image shows a splitting of the retinal layers (…
20200319	1	<1	1	Radiological	D	Paternal uniparental disomy 14 (UDP 14 pat) thoracic dysplasia	genetic_congenital_diseases	0.2	0.19	0.06	0.4	0.15	0.4	50721	1	0	0	D	Yes	No	A	No	No	A	No	No	Yes	No	No	2020-03-19	2025-04-10	https://www.nejm.org/image-challenge?ci=20200319&startFrom=261&startPage=14	A male neonate, born via cesarean section at 28 weeks of gestation, developed respiratory distress. The infant underwent intubation and surfactant administration through the endotracheal tube. Physical examination showed a giant omphalocele, webbed neck, and deformity of both hands. The pregnancy had been complicated by preeclampsia, and antenatal ultrasonography at 22 weeks of gestation had show…	**Correct answer: D. Paternal uniparental disomy 14 (UDP 14 pat) thoracic dysplasia**_x000D__x000D__x000D_ _x000D__x000D__x000D_ ---_x000D__x000D__x000D_ _x000D__x000D__x000D_ ### **Rationale:**_x000D__x000D__x000D_ _x000D__x000D__x000D_ The provided **neonatal chest radiograph** shows:_x000D__x000D__x000D_ _x000D__x000D__x000D_ * A **bell-shaped, narrow thorax** with short ribs._x000D__x000D__x0…	Based on the radiographic image provided, I can analyze the thoracic findings and provide a diagnosis from the options listed._x000D__x000D__x000D_ _x000D__x000D__x000D_ **The correct answer is A. Jeune syndrome (asphyxiating thoracic dystrophy).**_x000D__x000D__x000D_ _x000D__x000D__x000D_ ## Rationale for selecting Jeune syndrome:_x000D__x000D__x000D_ _x000D__x000D__x000D_ The X-ray shows sever…	Answer: A (Jeune syndrome asphyxiating thoracic dystrophy)_x000D__x000D__x000D_ Rationale_x000D__x000D__x000D_ Support for Jeune syndrome asphyxiating thoracic dystrophy_x000D__x000D__x000D_ Imaging appearance: Jeune syndrome, also known as asphyxiating thoracic dystrophy, is characterized by a narrow, bell - shaped thorax on X - ray. The chest X - ray in the image shows a narrow thoracic cage, w…
20200326	0	31	1	Radiological	B	Hydatid cyst	infectious_diseases	0.11	0.44	0.18	0.22	0.04	0.44	93059	1	0	0	B	Yes	No	D	No	No	D	No	No	Yes	No	No	2020-03-26	2025-04-10	https://www.nejm.org/image-challenge?ci=20200326&startFrom=261&startPage=14	A 31-year-old woman living in Greece presented with a 4-week history of blurred vision and 2 weeks of progressive bulging of her left orbit. On examination there was nontender proptosis of the left eye, paresis of the left abducens nerve, and reduced visual acuity in the left eye. A T2-weighted gadolinium-enhanced magnetic resonance image of the brain is shown. What is the most likely diagnosis?_…	**Correct Answer: B. Hydatid cyst**_x000D__x000D__x000D_ _x000D__x000D__x000D_ ---_x000D__x000D__x000D_ _x000D__x000D__x000D_ ### **Rationale:**_x000D__x000D__x000D_ _x000D__x000D__x000D_ This axial T2-weighted MRI of the orbit demonstrates **well-defined, spherical, T2-hyperintense cystic lesions** in the **right orbit**, displacing the globe anteriorly. The signal intensity is homogeneous, and …	Based on the MRI image provided, I'll analyze this orbital/ocular pathology and determine the most likely diagnosis from the options._x000D__x000D__x000D_ _x000D__x000D__x000D_ The correct answer is: D. Orbital dermoid cyst_x000D__x000D__x000D_ _x000D__x000D__x000D_ Detailed rationale for selecting orbital dermoid cyst:_x000D__x000D__x000D_ 1. The MRI shows a well-circumscribed, round/oval, hyper…	Answer: D (Orbital dermoid cyst)_x000D__x000D__x000D_ Rationale_x000D__x000D__x000D_ Support for Orbital dermoid cyst_x000D__x000D__x000D_ Imaging appearance: Orbital dermoid cysts are benign lesions that often appear as well - defined, cystic structures on MRI. The image shows a round, well - defined, cystic - appearing structure in the orbital region, which is consistent with the typical appear…
20200402	1	1-12	1	Physical Signs	A	Frey’s syndrome	traumatic_physical_diseases	0.61	0.15	0.1	0.07	0.07	0.61	59303	1	1	1	A	Yes	No	A	Yes	No	A	Yes	No	Yes	Yes	Yes	2020-04-02	2025-04-10	https://www.nejm.org/image-challenge?ci=20200402&startFrom=261&startPage=14	A 2-year-old boy who was born at full term and had been delivered with the assistance of forceps presented to the otolaryngology clinic with an 18-month history of flushing on his right cheek that appeared when he ate. Flushing appeared when he ate strawberries in the clinic and was not associated with pain, pruritus, sweating, or respiratory symptoms. The findings from the remainder of the exami…	**Correct answer: A. Frey’s syndrome**_x000D__x000D__x000D_ _x000D__x000D__x000D_ ---_x000D__x000D__x000D_ _x000D__x000D__x000D_ ### **Rationale:**_x000D__x000D__x000D_ _x000D__x000D__x000D_ The sequential facial photographs (A–D) depict a characteristic pattern of **transient, unilateral facial flushing** localized to the **preauricular and cheek region** in a child, which appears during **feedi…	Thank you for providing the clinical images and differential diagnoses. Based on the images shown, I'll analyze this pediatric case and provide my diagnosis with supporting rationale._x000D__x000D__x000D_ _x000D__x000D__x000D_ The correct answer is: A. Frey's syndrome_x000D__x000D__x000D_ _x000D__x000D__x000D_ Rationale for selecting Frey's syndrome:_x000D__x000D__x000D_ The images show a charact…	Answer: A (Frey’s syndrome)_x000D__x000D__x000D_ Rationale_x000D__x000D__x000D_ Support for Frey’s syndrome_x000D__x000D__x000D_ Clinical appearance and context: Frey’s syndrome typically occurs after parotid gland surgery or trauma. It is characterized by gustatory sweating and flushing in the preauricular and cheek areas. The images show flushing in the cheek and preauricular regions, which is …
20200409	0	45	1	Radiological	B	Multiple biliary hamartomas	genetic_congenital_diseases	0.04	0.48	0.15	0.1	0.23	0.48	67215	1	1	1	B	Yes	No	B	Yes	No	B	Yes	No	Yes	Yes	Yes	2020-04-09	2025-04-10	https://www.nejm.org/image-challenge?ci=20200409&startFrom=261&startPage=14	A 45-year-old woman was referred to the outpatient clinic after multiple hepatic lesions were incidentally noted on imaging. She had no related symptoms. The physical examination and laboratory tests were all normal. Enhanced computed tomography of the abdomen had shown multiple small, hypodense, nonenhancing nodules throughout the liver. Magnetic resonance imaging with cholangiopancreatography r…	**Correct Answer: B. Multiple biliary hamartomas**_x000D__x000D__x000D_ _x000D__x000D__x000D_ ---_x000D__x000D__x000D_ _x000D__x000D__x000D_ ### **Rationale:**_x000D__x000D__x000D_ _x000D__x000D__x000D_ The provided image is a **T2-weighted MR image of the liver**, which reveals **innumerable tiny hyperintense (bright) lesions** scattered throughout the liver parenchyma. These lesions are uniform…	Based on the provided MRI image of the liver, I'll analyze the findings and select the most appropriate diagnosis from the options provided._x000D__x000D__x000D_ _x000D__x000D__x000D_ ## The correct answer is B. Multiple biliary hamartomas_x000D__x000D__x000D_ _x000D__x000D__x000D_ ### Rationale for the diagnosis:_x000D__x000D__x000D_ The MRI image shows numerous small, well-defined hyperintense …	Answer: B (Multiple biliary hamartomas)_x000D__x000D__x000D_ Rationale_x000D__x000D__x000D_ Support for Multiple biliary hamartomas_x000D__x000D__x000D_ Imaging appearance: Multiple biliary hamartomas are small, cystic lesions that typically appear as numerous, well - defined, small cysts on imaging. The MRI image shows multiple small, bright (cystic) lesions throughout the liver parenchyma, whic…
20200416	1	71	1	Radiological	C	Metastatic adenocarcinoma	neoplastic_diseases	0.12	0.24	0.47	0.09	0.07	0.47	98956	0	0	0	B	No	No	B	No	No	B	No	No	No	No	No	2020-04-16	2025-04-10	https://www.nejm.org/image-challenge?ci=20200416&startFrom=261&startPage=14	A 71-year-old man was hospitalized with altered mental status progressing over the preceding 3 weeks. The patient had a recent diagnosis of adenocarcinoma of the colon with known metastatic lesions in the lung and bones. A gadolinium-enhanced magnetic resonance image of the brain was performed and is shown. What is the most likely diagnosis?_x000D__x000D__x000D_ _x000D__x000D__x000D_ A.Group D st…	**Correct Answer: B. Neurocysticercosis**_x000D__x000D__x000D_ _x000D__x000D__x000D_ ---_x000D__x000D__x000D_ _x000D__x000D__x000D_ ### **Rationale:**_x000D__x000D__x000D_ _x000D__x000D__x000D_ The provided **MRI brain (contrast-enhanced T1-weighted)** image reveals multiple small ring-enhancing lesions scattered throughout the cerebral parenchyma, with a predilection for the **gray-white junctio…	Based on the brain MRI image provided, I'll analyze the diagnostic possibilities and select the most likely diagnosis from the options._x000D__x000D__x000D_ _x000D__x000D__x000D_ The correct answer is: B. Neurocysticercosis_x000D__x000D__x000D_ _x000D__x000D__x000D_ Rationale for selecting neurocysticercosis:_x000D__x000D__x000D_ The MRI image shows multiple small, round, cystic lesions with rela…	Answer: B (Neurocysticercosis)_x000D__x000D__x000D_ Rationale_x000D__x000D__x000D_ Support for Neurocysticercosis_x000D__x000D__x000D_ Imaging appearance: Neurocysticercosis is caused by the larval stage of the pork tapeworm Taenia solium. On MRI, it can present as multiple small, cystic lesions with or without surrounding edema, which is consistent with the multiple small lesions seen in the ima…
20200423	0	83	1	Radiological	E	Achalasia	degenerative_functional_diseases	0.17	0.17	0.13	0.09	0.43	0.43	104097	1	1	0	E	Yes	No	E	Yes	No	A	No	No	Yes	Yes	No	2020-04-23	2025-04-10	https://www.nejm.org/image-challenge?ci=20200423&startFrom=241&startPage=13	An 83-year-old woman presented to the gastroenterology clinic with dysphagia and regurgitation that occurred with every meal associated with postprandial chest pain. For several years she had difficulty swallowing both solids and liquids. Barium esophagram is shown. What is the diagnosis?_x000D__x000D__x000D_ _x000D__x000D__x000D_ A.Scleroderma_x000D__x000D__x000D_ _x000D__x000D__x000D_ B.Esophag…	**Correct Answer: E. Achalasia**_x000D__x000D__x000D_ _x000D__x000D__x000D_ ---_x000D__x000D__x000D_ _x000D__x000D__x000D_ ### **Rationale:**_x000D__x000D__x000D_ _x000D__x000D__x000D_ The barium swallow radiograph shows a markedly dilated esophagus with a smooth tapering at the gastroesophageal junction, producing a characteristic **"bird's beak" appearance**, which is pathognomonic for **achala…	Based on the provided radiographic image, which appears to be a barium swallow examination of the esophagus, the correct answer is:_x000D__x000D__x000D_ _x000D__x000D__x000D_ **E. Achalasia**_x000D__x000D__x000D_ _x000D__x000D__x000D_ ## Rationale for selecting Achalasia:_x000D__x000D__x000D_ _x000D__x000D__x000D_ The image shows classic radiographic findings of achalasia, including:_x000D__x000D…	Answer: A (Scleroderma)_x000D__x000D__x000D_ Rationale_x000D__x000D__x000D_ Support for Scleroderma_x000D__x000D__x000D_ Radiographic appearance: The barium swallow X - ray shows a “corkscrew” or “rosary - bead” appearance of the esophagus, which is characteristic of scleroderma. In scleroderma, there is progressive fibrosis and atrophy of the esophageal smooth muscle, leading to abnormal contrac…
20200430	1	34	1	Other	D	Fungal endophthalmitis	infectious_diseases	0.09	0.1	0.09	0.61	0.1	0.61	42904	1	1	0	D	Yes	No	D	Yes	Yes	C	No	No	Yes	Yes	No	2020-04-30	2025-04-10	https://www.nejm.org/image-challenge?ci=20200430&startFrom=241&startPage=13	A 34-year-old man with a history of intravenous drug use and hepatitis C infection presented to the ophthalmology clinic with a 1-week history of pain and decreased vision in his right eye. The visual acuity was 20/400 in the right eye and 20/20 in the left eye. Slit-lamp examination of the right eye showed conjunctival injection and inflammation in the anterior chamber. Indirect ophthalmoscopy s…	**Correct Answer: D. Fungal endophthalmitis**_x000D__x000D__x000D_ _x000D__x000D__x000D_ ---_x000D__x000D__x000D_ _x000D__x000D__x000D_ ### **Rationale:**_x000D__x000D__x000D_ _x000D__x000D__x000D_ The image shows an intraoperative view of the fundus during a pars plana vitrectomy. There is a white, ball-like lesion with surrounding fluffy material and adjacent hemorrhage. The lesion appears to b…	I can see the clinical image provided, which appears to be a fundoscopic (retinal) image showing what looks like a mass or lesion in the eye. Based on the image characteristics, I'll analyze each of the possible diagnoses._x000D__x000D__x000D_ _x000D__x000D__x000D_ The correct answer is: **D. Fungal endophthalmitis**_x000D__x000D__x000D_ _x000D__x000D__x000D_ **Rationale for selecting fungal endo…	Answer: C (Astrocytic hamartoma)_x000D__x000D__x000D_ Support for Astrocytic hamartoma_x000D__x000D__x000D_ Astrocytic hamartomas are benign tumors that commonly occur in the retina, especially in patients with tuberous sclerosis. They typically appear as white, calcified, or partially calcified lesions in the retina. The image shows a white - appearing lesion in the retina, which is consistent w…
20200507	0	72	1	Physical Signs	A	Scurvy	metabolic_nutritional_diseases	0.39	0.23	0.06	0.11	0.22	0.39	111555	1	0	0	A	Yes	No	B	No	No	D	No	No	Yes	No	No	2020-05-07	2025-04-09	https://www.nejm.org/image-challenge?ci=20200507&startFrom=241&startPage=13	A 72-year-old woman with a history of esophageal strictures presented to the emergency department with a 3-month history of a rash on both legs. What is the most likely diagnosis?_x000D__x000D__x000D_ _x000D__x000D__x000D_ A.Scurvy_x000D__x000D__x000D_ _x000D__x000D__x000D_ B.Immune thrombocytopenic purpura_x000D__x000D__x000D_ _x000D__x000D__x000D_ C.Covid-19 infection_x000D__x000D__x000D_ _x000…	**Correct Answer: A. Scurvy**_x000D__x000D__x000D_ _x000D__x000D__x000D_ ---_x000D__x000D__x000D_ _x000D__x000D__x000D_ ### **Rationale:**_x000D__x000D__x000D_ _x000D__x000D__x000D_ The image shows *multiple perifollicular hemorrhages* and *corkscrew hairs* over both lower legs. These are **classic dermatologic signs of scurvy**, which results from **vitamin C deficiency**._x000D__x000D__x000D_ _…	Based on the clinical images provided, I'll analyze each of the possible diagnoses and select the most appropriate answer._x000D__x000D__x000D_ _x000D__x000D__x000D_ The correct answer is B. Immune thrombocytopenic purpura (ITP)._x000D__x000D__x000D_ _x000D__x000D__x000D_ The images show multiple small, non-blanching, purpuric lesions (reddish-purple spots) distributed primarily on the lower extr…	Answer: D (Rocky mountain spotted fever)_x000D__x000D__x000D_ Rationale_x000D__x000D__x000D_ Support for Rocky mountain spotted fever_x000D__x000D__x000D_ Clinical appearance: Rocky mountain spotted fever is caused by the bacterium Rickettsia rickettsii and is transmitted by ticks. It often presents with a rash that starts as small, pink, maculopapular lesions and progresses to petechial or purpu…
20200514	1	1-12	1	Physical Signs	B	Fusariosis	infectious_diseases	0.23	0.3	0.08	0.23	0.16	0.3	97832	0	0	0	E	No	No	D	No	No	A	No	No	No	No	No	2020-05-14	2025-04-09	https://www.nejm.org/image-challenge?ci=20200514&startFrom=241&startPage=13	An 8-year-old boy receiving treatment for relapsing B-cell leukemia presented with subcutaneous nodules associated with a 1-week history of fever which persisted despite treatment with broad-spectrum intravenous antibiotics and antifungals. Physical examination revealed nodules ranging from 5 to 18 mm in diameter on the chest, back, arms, and legs. What is the diagnosis?_x000D__x000D__x000D_ _x00…	**Correct answer: E. Disseminated Bacillus Calmette–Guérin (BCG) disease**_x000D__x000D__x000D_ _x000D__x000D__x000D_ ---_x000D__x000D__x000D_ _x000D__x000D__x000D_ ### **Rationale:**_x000D__x000D__x000D_ _x000D__x000D__x000D_ The image shows multiple violaceous nodules at various stages of evolution on the lower leg. These lesions resemble erythematous to violaceous papules and nodules, some of …	After reviewing the clinical image, I'll analyze each diagnostic option to determine the most likely diagnosis._x000D__x000D__x000D_ _x000D__x000D__x000D_ The image shows multiple reddish-purple nodular lesions on what appears to be a forearm. These lesions have different sizes and appear to be at different stages of development._x000D__x000D__x000D_ _x000D__x000D__x000D_ ## Answer: D. Leukemia c…	Answer: A (Erythema nodosum)_x000D__x000D__x000D_ Rationale_x000D__x000D__x000D_ Support for Erythema nodosum_x000D__x000D__x000D_ Clinical appearance: Erythema nodosum presents as tender, red nodules, usually on the lower extremities but can also occur on the arms. The image shows red, nodular lesions on the arm, which is consistent with the characteristic skin manifestations of erythema nodosum…
20200521	1	69	1	Physical Signs	D	Silicone oil hyperoleon	drug_toxin_related_diseases	0.23	0.12	0.12	0.42	0.11	0.42	102036	1	1	0	D	Yes	No	D	Yes	No	B	No	No	Yes	Yes	No	2020-05-21	2025-04-09	https://www.nejm.org/image-challenge?ci=20200521&startFrom=241&startPage=13	A 69-year-old man with type 2 diabetes mellitus presented to the ophthalmology clinic for a routine ocular examination. He had a history of cataract surgery 3 years ago for a retinal detachment in the right eye. Clinical examination of the right eye showed a white substance covering the upper third of the iris. Visual acuity was 20/400 in the right eye and 20/40 in the left eye. What is the diagn…	**Correct answer: D. Silicone oil hyperoleon**_x000D__x000D__x000D_ _x000D__x000D__x000D_ ---_x000D__x000D__x000D_ _x000D__x000D__x000D_ ### **Rationale:**_x000D__x000D__x000D_ _x000D__x000D__x000D_ The image shows an **oil-fluid level in the anterior chamber**, with a clear meniscus separating a superior, lighter substance from the aqueous inferiorly. This classic appearance is known as a **“hyp…	Based on the clinical image provided, the most likely diagnosis is:_x000D__x000D__x000D_ _x000D__x000D__x000D_ **D. Silicone oil hyperoleon**_x000D__x000D__x000D_ _x000D__x000D__x000D_ ## Rationale for the selected diagnosis:_x000D__x000D__x000D_ The image shows a distinct two-layered appearance in the anterior chamber of the eye, with a clear demarcation line between a whitish/transparent upper …	Answer: B (Ghost cell glaucoma)_x000D__x000D__x000D_ Support for Ghost cell glaucoma_x000D__x000D__x000D_ Ghost cell glaucoma occurs when red blood cells (ghost cells) from a vitreous hemorrhage enter the anterior chamber and clog the trabecular meshwork, leading to increased intraocular pressure. The image shows a distinct layering of material in the anterior chamber, which is characteristic of …
20200528	1	1-12	1	Physical Signs	B	Linear IgA bullous dermatosis	immune_mediated_diseases	0.08	0.43	0.13	0.13	0.23	0.43	136201	1	0	1	B	Yes	No	A	No	No	B	Yes	No	Yes	No	Yes	2020-05-28	2025-04-09	https://www.nejm.org/image-challenge?ci=20200528&startFrom=241&startPage=13	A 5-year-old boy presented to the dermatology clinic with a 2-week history of multiple painless and tense bullae containing clear to slightly hemorrhagic fluid and localized to the scrotum. What is the most likely diagnosis?_x000D__x000D__x000D_ _x000D__x000D__x000D_ A.Fixed drug eruption_x000D__x000D__x000D_ _x000D__x000D__x000D_ B.Linear IgA bullous dermatosis_x000D__x000D__x000D_ _x000D__x000D…	**Correct answer: B. Linear IgA bullous dermatosis**_x000D__x000D__x000D_ _x000D__x000D__x000D_ ---_x000D__x000D__x000D_ _x000D__x000D__x000D_ ### **Rationale:**_x000D__x000D__x000D_ _x000D__x000D__x000D_ The image shows grouped, tense vesicles and bullae in various stages, including hemorrhagic and clear, on inflamed skin of the genital area — classic for **Linear IgA bullous dermatosis (LABD)**…	Based on the clinical image provided, the most likely diagnosis is:_x000D__x000D__x000D_ _x000D__x000D__x000D_ **A. Fixed drug eruption**_x000D__x000D__x000D_ _x000D__x000D__x000D_ ## Rationale for selecting Fixed Drug Eruption:_x000D__x000D__x000D_ _x000D__x000D__x000D_ The image shows characteristic features of a fixed drug eruption (FDE), including:_x000D__x000D__x000D_ - Well-demarcated, eryt…	_x000D__x000D__x000D_ Answer: B (Linear IgA bullous dermatosis)_x000D__x000D__x000D_ Rationale_x000D__x000D__x000D_ Support for Linear IgA bullous dermatosis_x000D__x000D__x000D_ Clinical appearance: Linear IgA bullous dermatosis presents with tense blisters, often in a cluster or linear arrangement. The image shows multiple, tense - looking blisters of varying sizes on the skin, which is consist…
20200604	1	59	1	Physical Signs	C	Cutaneous metastases	neoplastic_diseases	0.15	0.11	0.57	0.06	0.11	0.57	75725	0	0	0	A	No	No	A	No	No	A	No	No	No	No	No	2020-06-04	2025-04-09	https://www.nejm.org/image-challenge?ci=20200604&startFrom=241&startPage=13	A 59-year-old man with metastatic colon cancer presented to the dermatology clinic with a 10-week history of painless and nonpruritic skin lesions coalescing around a large abdominal scar from a hemicolectomy performed 3 years earlier. On examination, the lesions were firm, pink to violaceous in color, and vesicular-appearing. What is the diagnosis?_x000D__x000D__x000D_ _x000D__x000D__x000D_ A.He…	**Correct Answer: A. Herpes zoster**_x000D__x000D__x000D_ _x000D__x000D__x000D_ ---_x000D__x000D__x000D_ _x000D__x000D__x000D_ ### **Rationale:**_x000D__x000D__x000D_ _x000D__x000D__x000D_ The image shows a **unilateral, dermatomal eruption** on the abdomen with **grouped vesicles on an erythematous base**, some of which appear to be crusted, as well as a clear linear distribution. This is highly…	Based on the clinical image provided, I can analyze this dermatological case._x000D__x000D__x000D_ _x000D__x000D__x000D_ **The correct answer is A. Herpes zoster.**_x000D__x000D__x000D_ _x000D__x000D__x000D_ **Rationale for selecting Herpes zoster:**_x000D__x000D__x000D_ The image shows a characteristic pattern of erythematous, vesicular lesions in a linear or band-like distribution across the pa…	Answer: A (Herpes zoster)_x000D__x000D__x000D_ Rationale_x000D__x000D__x000D_ Support for Herpes zoster_x000D__x000D__x000D_ Clinical appearance: Herpes zoster is caused by the reactivation of the varicella - zoster virus. It typically presents as a painful, vesicular rash in a dermatomal distribution. The image shows a rash on the abdomen that follows a dermatomal pattern, which is characteristi…
20200611	1	78	1	Physical Signs	A	Tissue plasminogen activator-associated angioedema	immune_mediated_diseases	0.47	0.15	0.09	0.16	0.13	0.47	89745	1	1	0	A	Yes	No	A	Yes	No	D	No	No	Yes	Yes	No	2020-06-11	2025-04-09	https://www.nejm.org/image-challenge?ci=20200611&startFrom=241&startPage=13	A 78-year-old man presented to the emergency department with weakness on the left side that had developed 90 minutes earlier. An ischemic stroke in the territory of the right middle cerebral artery was diagnosed, and treatment was initiated. After some time, examination showed the following change in the patient’s tongue. What is the most likely diagnosis?_x000D__x000D__x000D_ _x000D__x000D__x000…	**Correct Answer: A. Tissue plasminogen activator-associated angioedema**_x000D__x000D__x000D_ _x000D__x000D__x000D_ ---_x000D__x000D__x000D_ _x000D__x000D__x000D_ ### **Clinical Reasoning:**_x000D__x000D__x000D_ _x000D__x000D__x000D_ The image shows marked **unilateral swelling of the tongue**, most pronounced on the left side, in a patient with an oxygen cannula in place, suggesting acute care.…	Based on the clinical image provided, the correct answer is:_x000D__x000D__x000D_ _x000D__x000D__x000D_ **A. Tissue plasminogen activator-associated angioedema**_x000D__x000D__x000D_ _x000D__x000D__x000D_ ## Rationale for the Selected Diagnosis_x000D__x000D__x000D_ _x000D__x000D__x000D_ The image shows a dramatically swollen tongue (glossal edema) with redness and prominent unilateral involvement…	Answer: D (Unilateral hypoglossal nerve palsy)_x000D__x000D__x000D_ Rationale_x000D__x000D__x000D_ Support for Unilateral hypoglossal nerve palsy_x000D__x000D__x000D_ Clinical appearance: The tongue in the image shows deviation to one side, which is characteristic of unilateral hypoglossal nerve (CN XII) palsy. The hypoglossal nerve controls the muscles of the tongue. When there is damage to this…
20200618	1	26	1	Physical Signs	E	Uremic stomatitis	infectious_diseases	0.22	0.17	0.14	0.13	0.34	0.34	138639	0	0	0	D	No	No	D	No	No	D	No	No	No	No	No	2020-06-18	2025-04-09	https://www.nejm.org/image-challenge?ci=20200618&startFrom=241&startPage=13	A 26-year-old man presented to the emergency department with a 2-month history of an altered sense of taste associated with malaise, weight loss, and muscle cramps. Physical examination showed white, sharply demarcated, adherent plaques on the sides of the tongue. What is the diagnosis?_x000D__x000D__x000D_ _x000D__x000D__x000D_ A.Oral hairy leukoplakia_x000D__x000D__x000D_ _x000D__x000D__x000D_ …	**Correct answer: D. Candidiasis**_x000D__x000D__x000D_ _x000D__x000D__x000D_ ---_x000D__x000D__x000D_ _x000D__x000D__x000D_ ### **Rationale:**_x000D__x000D__x000D_ _x000D__x000D__x000D_ The image shows **thick, white-yellowish, curd-like plaques along the lateral borders of the tongue**. These plaques appear to be **loosely adherent** and overlie an erythematous mucosal surface — a classic appea…	Based on the clinical image provided, I can see a thick white-yellowish coating primarily on the lateral margins of the tongue with some redness of the tongue surface. After careful analysis:_x000D__x000D__x000D_ _x000D__x000D__x000D_ **The correct answer is D. Candidiasis**_x000D__x000D__x000D_ _x000D__x000D__x000D_ ## Rationale for selecting Candidiasis:_x000D__x000D__x000D_ The image shows the…	Answer: D (Candidiasis)_x000D__x000D__x000D_ Rationale_x000D__x000D__x000D_ Support for Candidiasis_x000D__x000D__x000D_ Clinical appearance: Candidiasis, caused by Candida species, often presents with white, curd - like patches on the oral mucosa, including the tongue. These patches can be adherent and may leave a red, raw surface when scraped. The image shows white - yellowish patches on the si…
20200625	1	78	1	Physical Signs	A	Cytomegalovirus infection	infectious_diseases	0.4	0.09	0.14	0.18	0.19	0.4	94421	0	0	0	D	No	No	C	No	No	C	No	No	No	No	No	2020-06-25	2025-04-09	https://www.nejm.org/image-challenge?ci=20200625&startFrom=241&startPage=13	A 78-year-old man with end-stage renal disease, diabetes mellitus, and microscopic polyangiitis, for which he was taking glucocorticoids, presented to the rheumatology clinic with fever, painful glossitis, and taste abnormalities that had persisted for 1 month. Examination of the tongue showed a large, punched-out, painful ulcer. What is the diagnosis?_x000D__x000D__x000D_ _x000D__x000D__x000D_ A…	**Correct answer: D. Behçet’s disease**_x000D__x000D__x000D_ _x000D__x000D__x000D_ ---_x000D__x000D__x000D_ _x000D__x000D__x000D_ ### **Rationale:**_x000D__x000D__x000D_ _x000D__x000D__x000D_ The image shows a tongue with **multiple well-demarcated, round, shallow ulcers** on an erythematous base. The distribution and recurrence of painful oral ulcers—especially involving the **tongue and buccal …	Based on the clinical image provided, I'll analyze the likely diagnosis from the options listed._x000D__x000D__x000D_ _x000D__x000D__x000D_ The image shows a tongue with multiple white-yellowish papules/nodules on an erythematous base, with some areas appearing to have ulceration and an irregular surface pattern._x000D__x000D__x000D_ _x000D__x000D__x000D_ **The correct answer is: C. Herpes simple…	Answer: C (Herpes simplex virus infection)_x000D__x000D__x000D_ Rationale_x000D__x000D__x000D_ Support for Herpes simplex virus infection_x000D__x000D__x000D_ Clinical appearance: Herpes simplex virus (HSV) infection often presents with painful, grouped vesicles on an erythematous base, which can ulcerate. The image shows ulcerative lesions on the tongue, which is consistent with HSV infection. H…
20200702	1	41	1	Physical Signs	E	Chromoblastomycosis	infectious_diseases	0.14	0.15	0.09	0.23	0.39	0.39	107223	1	1	0	E	Yes	No	E	Yes	No	D	No	No	Yes	Yes	No	2020-07-02	2025-04-09	https://www.nejm.org/image-challenge?ci=20200702&startFrom=241&startPage=13	A 41-year-old farmer presented with a 20-year history of slowly growing lesions on the right leg that progressed over time to cause gait abnormality. The lesions were initially painless, pruritic papules on the knee and gradually spread to the dorsum of the foot. Physical examination revealed palpable, coalescent, subcutaneous nodules with verrucous lesions and associated skin changes. What is th…	**Correct answer: E. Chromoblastomycosis**_x000D__x000D__x000D_ _x000D__x000D__x000D_ ---_x000D__x000D__x000D_ _x000D__x000D__x000D_ ### **Rationale:**_x000D__x000D__x000D_ _x000D__x000D__x000D_ The image shows a chronic, verrucous, hyperkeratotic, cauliflower-like lesion on the foot and lower leg. These findings are highly characteristic of **chromoblastomycosis**, a chronic subcutaneous fungal …	Based on the clinical image provided, the correct diagnosis is:_x000D__x000D__x000D_ _x000D__x000D__x000D_ **E. Chromoblastomycosis**_x000D__x000D__x000D_ _x000D__x000D__x000D_ **Rationale for selecting chromoblastomycosis:**_x000D__x000D__x000D_ The image shows a foot with characteristic verrucous, hyperkeratotic, nodular lesions with a cauliflower-like appearance. These warty, reddish-brown, cr…	Answer: D (Epidermodysplasia verruciformis)_x000D__x000D__x000D_ Rationale_x000D__x000D__x000D_ Support for Epidermodysplasia verruciformis_x000D__x000D__x000D_ Clinical appearance: Epidermodysplasia verruciformis is a rare genetic disorder that makes individuals highly susceptible to human papillomavirus (HPV) infections. The skin lesions in the image show a widespread, wart - like appearance on…
20200716	0	24	1	Radiological	B	Ergotism	drug_toxin_related_diseases	0.1	0.53	0.02	0.08	0.27	0.53	60684	0	0	0	A	No	No	E	No	No	E	No	No	No	No	No	2020-07-16	2025-04-09	https://www.nejm.org/image-challenge?ci=20200716&startFrom=241&startPage=13	A 24-year-old woman with a history of HIV, currently on antiretroviral therapy, presented with 2 days of severe, burning leg pain. She had a migraine headache 4 days before presentation for which she was taking ergotamine twice daily. Leg pain extended from toes to midthigh. On physical examination, both legs were cold with absent popliteal and dorsalis pedis pulses. What is the diagnosis?_x000D_…	**Correct answer: A. Atherosclerosis**_x000D__x000D__x000D_ _x000D__x000D__x000D_ ---_x000D__x000D__x000D_ _x000D__x000D__x000D_ ### **Clinical Analysis:**_x000D__x000D__x000D_ _x000D__x000D__x000D_ This image is a **CT angiogram** of the lower extremities. It demonstrates **vascular anatomy with contrast enhancement**, allowing visualization of arterial patency and flow._x000D__x000D__x000D_ _x0…	Based on the CT angiogram image provided, I'll analyze this case and select the most likely diagnosis from the options._x000D__x000D__x000D_ _x000D__x000D__x000D_ The image shows a CT angiogram of the lower extremities that demonstrates significant vascular abnormalities. There appears to be bilateral occlusion or severe narrowing of multiple arterial segments, particularly in the mid to distal p…	Answer: E (Thromboangitis obliterans)_x000D__x000D__x000D_ Rationale_x000D__x000D__x000D_ Support for Thromboangitis obliterans_x000D__x000D__x000D_ Imaging appearance: Thromboangitis obliterans (Buerger's disease) is a non - atherosclerotic, inflammatory disease that primarily affects small and medium - sized arteries and veins in the extremities. The angiogram shows occlusion and abnormal appea…
20200723	0	50	1	Physical Signs	C	Extranodal natural killer T-cell lymphoma	neoplastic_diseases	0.2	0.14	0.36	0.11	0.19	0.36	144365	1	0	1	C	Yes	No	E	No	No	C	Yes	No	Yes	No	Yes	2020-07-23	2025-04-09	https://www.nejm.org/image-challenge?ci=20200723&startFrom=241&startPage=13	A 50-year-old woman presented to the dermatology clinic with a painless ulcer on her palate and a swollen upper lip. She had an associated history of intermittent fevers and malaise. She described nasal obstruction with purulent discharge for the last 3 years, for which she received treatment with intranasal glucocorticoids and antibiotics. What is the diagnosis?_x000D__x000D__x000D_ _x000D__x000…	**Correct Answer: C. Extranodal natural killer T-cell lymphoma**_x000D__x000D__x000D_ _x000D__x000D__x000D_ ---_x000D__x000D__x000D_ _x000D__x000D__x000D_ ### **Rationale for Correct Answer (C):**_x000D__x000D__x000D_ _x000D__x000D__x000D_ The clinical image reveals **extensive necrosis of the midline hard palate and surrounding structures**, along with black eschar formation and inflamed gingiva…	Based on the clinical image showing an oral lesion on the hard palate, I'll analyze each option carefully._x000D__x000D__x000D_ _x000D__x000D__x000D_ ## The correct answer is E. Necrotizing sialometaplasia_x000D__x000D__x000D_ _x000D__x000D__x000D_ ### Rationale for selecting necrotizing sialometaplasia:_x000D__x000D__x000D_ The image shows a dark, necrotic lesion on the hard palate with surround…	_x000D__x000D__x000D_ Answer: C (Extranodal natural killer T - cell lymphoma)_x000D__x000D__x000D_ Rationale_x000D__x000D__x000D_ Support for Extranodal natural killer T - cell lymphoma_x000D__x000D__x000D_ Clinical appearance: Extranodal natural killer T - cell lymphoma often involves the upper aerodigestive tract, including the oral cavity. The image shows significant oral ulceration, necrosis,…
20200730	1	48	1	Physical Signs	E	Necrolytic migratory erythema	neoplastic_diseases	0.09	0.13	0.24	0.12	0.42	0.42	88128	1	1	0	E	Yes	No	E	Yes	No	C	No	No	Yes	Yes	No	2020-07-30	2025-04-09	https://www.nejm.org/image-challenge?ci=20200730&startFrom=241&startPage=13	A 48-year-old man presented to the dermatology clinic with a 2-month history of an itchy rash that began in the genital region and then progressed to his torso, hands, and legs. He also noted a 13-kg weight loss over the past few months. On examination, he had erythematous patches and plaques at various stages of healing. What is the diagnosis?_x000D__x000D__x000D_ _x000D__x000D__x000D_ A.Herpes …	**Correct answer: E. Necrolytic migratory erythema**_x000D__x000D__x000D_ _x000D__x000D__x000D_ ---_x000D__x000D__x000D_ _x000D__x000D__x000D_ ### **Clinical Reasoning:**_x000D__x000D__x000D_ _x000D__x000D__x000D_ The image depicts a distinctive rash characterized by:_x000D__x000D__x000D_ _x000D__x000D__x000D_ * Erythematous, scaly, and erosive plaques with central clearing and blistering._x000D_…	Based on the clinical image provided, I'll analyze this dermatological presentation and select the most appropriate diagnosis from the options provided._x000D__x000D__x000D_ _x000D__x000D__x000D_ The correct answer is: E. Necrolytic migratory erythema_x000D__x000D__x000D_ _x000D__x000D__x000D_ Rationale for this diagnosis:_x000D__x000D__x000D_ The image shows characteristic features of necrolytic…	Answer: C (Paraneoplastic pemphigus)_x000D__x000D__x000D_ Rationale_x000D__x000D__x000D_ Support for Paraneoplastic pemphigus_x000D__x000D__x000D_ Clinical appearance: Paraneoplastic pemphigus often presents with a polymorphic skin rash, which can include erythematous and blistering lesions. The rash in the image shows a pattern of erythematous patches, which is consistent with the cutaneous mani…
20200806	0	60	1	Physical Signs	B	Metastasis of colorectal cancer	neoplastic_diseases	0.11	0.42	0.21	0.16	0.1	0.42	91712	0	0	0	D	No	No	E	No	No	C	No	No	No	No	No	2020-08-06	2025-04-09	https://www.nejm.org/image-challenge?ci=20200806&startFrom=241&startPage=13	A 60-year-old woman presented to an oral surgery clinic with gum swelling. She had associated bleeding while brushing her teeth. She had a history of colorectal cancer treated with surgery and chemotherapy. On examination, a large, nontender, pedunculated mass was noted. What is the diagnosis?_x000D__x000D__x000D_ _x000D__x000D__x000D_ A.Zimmerman-Laband syndrome_x000D__x000D__x000D_ _x000D__x000…	**Correct answer: D. Alveolar soft part sarcoma**_x000D__x000D__x000D_ _x000D__x000D__x000D_ ---_x000D__x000D__x000D_ _x000D__x000D__x000D_ ### **Clinical Reasoning:**_x000D__x000D__x000D_ _x000D__x000D__x000D_ The image shows a **lobulated, ulcerated, and vascular mass** arising from the gingiva or alveolar ridge. This lesion appears highly vascular and locally invasive, pushing adjacent teeth a…	Looking at the image provided, I can see an oral lesion in the gingival region near the lower teeth. I'll analyze this clinical finding and provide my assessment of the most likely diagnosis from the options given._x000D__x000D__x000D_ _x000D__x000D__x000D_ The correct answer is: **E. Irritation fibroma**_x000D__x000D__x000D_ _x000D__x000D__x000D_ **Rationale for selecting Irritation fibroma:**_x…	_x000D__x000D__x000D_ Answer: C (Gingival hyperplasia secondary to chemotherapy)_x000D__x000D__x000D_ Rationale_x000D__x000D__x000D_ Support for Gingival hyperplasia secondary to chemotherapy_x000D__x000D__x000D_ Clinical appearance: The image shows an enlarged, reddish - inflamed area on the gingiva. Chemotherapy can cause side effects including gingival hyperplasia. Certain chemotherapy drugs c…
20200813	1	47	1	Physical Signs	A	Poststreptococcal pustulosis	infectious_diseases	0.54	0.1	0.23	0.11	0.03	0.54	118276	0	0	0	B	No	No	E	No	No	B	No	No	No	No	No	2020-08-13	2025-04-09	https://www.nejm.org/image-challenge?ci=20200813&startFrom=241&startPage=13	A 47-year-old man presented to the emergency department with a 3-day history of a pustular rash on both hands. One week before presentation, he had started treatment with penicillin V potassium for pharyngitis. Physical examination demonstrated a rash as shown, with a similar rash being present on the soles of both of his feet. A punch-biopsy specimen of a palmar lesion was obtained, and histopat…	**Correct answer: B. Palmoplantar psoriasis**_x000D__x000D__x000D_ _x000D__x000D__x000D_ ---_x000D__x000D__x000D_ _x000D__x000D__x000D_ ### **Diagnostic Rationale:**_x000D__x000D__x000D_ _x000D__x000D__x000D_ The image shows **erythematous, scaly plaques and numerous sterile pustules** distributed on both palms. This is classic for **palmoplantar pustular psoriasis**, a variant of psoriasis that …	Based on the clinical image provided, the correct answer is:_x000D__x000D__x000D_ _x000D__x000D__x000D_ **E. Scabies**_x000D__x000D__x000D_ _x000D__x000D__x000D_ ## Rationale for Scabies:_x000D__x000D__x000D_ _x000D__x000D__x000D_ The image shows characteristic findings of scabies, which is caused by the mite Sarcoptes scabiei var. hominis. The key diagnostic features visible in this image includ…	Answer: B (Palmoplantar psoriasis)_x000D__x000D__x000D_ Rationale_x000D__x000D__x000D_ Support for Palmoplantar psoriasis_x000D__x000D__x000D_ Clinical appearance: Palmoplantar psoriasis presents with pustules on the palms and soles. The image shows numerous pustules on the palms, which is consistent with this condition. It often appears as sterile pustules on an erythematous base, and can be acc…
20200820	0	30	1	Physical Signs	B	Pemphigoid gestationis	immune_mediated_diseases	0.09	0.45	0.05	0.1	0.3	0.45	78370	0	0	1	E	No	No	E	No	No	B	Yes	No	No	No	Yes	2020-08-20	2025-04-09	https://www.nejm.org/image-challenge?ci=20200820&startFrom=241&startPage=13	A 30-year-old pregnant woman at 34 weeks of gestation presented to the emergency department with a 5-day history of an itchy rash that began on her abdomen and then spread to her thorax and extremities. Physician examination revealed papules on her abdomen and bullous blisters on her arm. What is the diagnosis?_x000D__x000D__x000D_ _x000D__x000D__x000D_ A.Dermatitis herpetiformis_x000D__x000D__x0…	**Correct answer: E. Pruritic urticarial papules and plaques of pregnancy (PUPPP)**_x000D__x000D__x000D_ _x000D__x000D__x000D_ ---_x000D__x000D__x000D_ _x000D__x000D__x000D_ ### **Clinical Reasoning:**_x000D__x000D__x000D_ _x000D__x000D__x000D_ The image shows the **abdomen of a pregnant woman** with **erythematous, urticarial plaques** coalescing into large patches, sparing the periumbilical reg…	Based on the clinical image provided, I'll analyze this dermatological presentation and select the most appropriate diagnosis from the options._x000D__x000D__x000D_ _x000D__x000D__x000D_ The correct answer is E: Pruritic urticarial papules and plaques of pregnancy (PUPPP)._x000D__x000D__x000D_ _x000D__x000D__x000D_ ## Rationale for selecting PUPPP:_x000D__x000D__x000D_ The image shows an abdomina…	Answer: B (Pemphigoid gestationis)_x000D__x000D__x000D_ Rationale_x000D__x000D__x000D_ Support for Pemphigoid gestationis_x000D__x000D__x000D_ Clinical context and appearance: Pemphigoid gestationis is an autoimmune blistering disease that occurs during pregnancy or in the postpartum period. The image shows a rash on the abdomen, which can be an early manifestation of pemphigoid gestationis. This…
20200827	0	89	1	Physical Signs	A	Conjunctival squamous-cell carcinoma	neoplastic_diseases	0.45	0.14	0.16	0.1	0.15	0.45	74001	0	0	1	E	No	No	E	No	No	A	Yes	No	No	No	Yes	2020-08-27	2025-04-09	https://www.nejm.org/image-challenge?ci=20200827&startFrom=241&startPage=13	An 89-year-old woman presented to the ophthalmology clinic with a 4-month history of redness and a sensation of a foreign body in her right eye. Slit-lamp examination revealed a red, raised lesion on the conjunctiva that extended onto the cornea with accompanying prominent blood vessels. What is the diagnosis?_x000D__x000D__x000D_ _x000D__x000D__x000D_ A.Conjunctival squamous-cell carcinoma_x000D…	**Correct answer: E. Pyogenic granuloma**_x000D__x000D__x000D_ _x000D__x000D__x000D_ ---_x000D__x000D__x000D_ _x000D__x000D__x000D_ ### **Rationale:**_x000D__x000D__x000D_ _x000D__x000D__x000D_ The image shows a vascular, raised, reddish lesion on the bulbar conjunctiva with a smooth surface and a prominent feeder vessel, characteristic of a **pyogenic granuloma**. Despite its name, it is neither…	Based on the clinical image provided, the most likely diagnosis is:_x000D__x000D__x000D_ _x000D__x000D__x000D_ **E. Pyogenic granuloma**_x000D__x000D__x000D_ _x000D__x000D__x000D_ ## Rationale for selecting Pyogenic Granuloma_x000D__x000D__x000D_ _x000D__x000D__x000D_ The image shows a localized, elevated, vascular-appearing lesion at the limbus (junction between cornea and sclera). This lesion h…	Answer: A (Conjunctival squamous - cell carcinoma)_x000D__x000D__x000D_ Rationale_x000D__x000D__x000D_ Support for Conjunctival squamous - cell carcinoma_x000D__x000D__x000D_ Clinical appearance: The image shows a fleshy, elevated lesion on the conjunctiva near the cornea, with associated vascularization. Conjunctival squamous - cell carcinoma often presents as a mass or thickening of the conjunc…
20200903	1	44	1	Pathological	B	Naegleria fowleri	infectious_diseases	0.17	0.49	0.18	0.09	0.07	0.49	59279	1	1	0	B	Yes	No	B	Yes	No	D	No	No	Yes	Yes	No	2020-09-03	2025-04-09	https://www.nejm.org/image-challenge?ci=20200903&startFrom=241&startPage=13	A 44-year-old man presented with confusion and a cough a few days after swimming in an indoor pool. At presentation, he had a body temperature of 39.8°C and appeared drowsy. He did not respond to questions or blink to visual threat; however, brainstem reflexes were intact, and he withdrew both arms and both legs from painful stimuli. A lumbar puncture was performed and showed 2083 nucleated cells…	**Correct Answer: B. *Naegleria fowleri***_x000D__x000D__x000D_ _x000D__x000D__x000D_ ---_x000D__x000D__x000D_ _x000D__x000D__x000D_ ### **Rationale:**_x000D__x000D__x000D_ _x000D__x000D__x000D_ The image is a cytologic specimen showing **numerous neutrophils and large amoeboid organisms with prominent nuclei and nucleoli**. These features are consistent with a free-living amoeba and are characte…	Looking at the provided microscopic image and the given options, I'm analyzing what appears to be a cytology or pathology slide with Wright or Giemsa staining, showing cellular elements._x000D__x000D__x000D_ _x000D__x000D__x000D_ The correct answer is: B. Naegleria fowleri_x000D__x000D__x000D_ _x000D__x000D__x000D_ Rationale for selecting Naegleria fowleri:_x000D__x000D__x000D_ The image shows wh…	Answer: D (Sappinia diploidea)_x000D__x000D__x000D_ Rationale_x000D__x000D__x000D_ Support for Sappinia diploidea_x000D__x000D__x000D_ Microscopic appearance: The image shows characteristic large, binucleated trophozoites, which are typical of Sappinia diploidea. This amoeba can cause granulomatous amoebic encephalitis, especially in immunocompromised individuals. The binucleated form is a key id…
20200910	1	62	1	Pathological	B	Capnocytophaga canimorsus	infectious_diseases	0.17	0.4	0.21	0.11	0.11	0.4	62549	1	0	1	B	Yes	No	D	No	No	B	Yes	No	Yes	No	Yes	2020-09-10	2025-04-09	https://www.nejm.org/image-challenge?ci=20200910&startFrom=221&startPage=12	A 62-year-old man presented to the emergency department with a 1-day history of fever and 3-day history of chest pain. He had a history of coronary artery disease and splenectomy. On examination, he had three dog-bite wounds on his left hand. Laboratory studies revealed a white-cell count of 16,700 per cubic millimeter (reference range, 3900 to 10,200) and a platelet count of 3100 per cubic milli…	**Correct Answer: B. *Capnocytophaga canimorsus***_x000D__x000D__x000D_ _x000D__x000D__x000D_ ---_x000D__x000D__x000D_ _x000D__x000D__x000D_ ### **Rationale:**_x000D__x000D__x000D_ _x000D__x000D__x000D_ This peripheral blood smear shows multiple rod-shaped bacteria (thin, fusiform Gram-negative rods) within the cytoplasm of neutrophils (black arrow), which is highly characteristic of **Capnocytop…	Based on the peripheral blood smear image provided, I select:_x000D__x000D__x000D_ _x000D__x000D__x000D_ **D. Babesia microti**_x000D__x000D__x000D_ _x000D__x000D__x000D_ ## Rationale for selecting Babesia microti:_x000D__x000D__x000D_ _x000D__x000D__x000D_ The image shows a peripheral blood smear with numerous red blood cells (erythrocytes) and, most importantly, intraerythrocytic parasites (ind…	Answer: B (Capnocytophaga canimorsus)_x000D__x000D__x000D_ Rationale_x000D__x000D__x000D_ Support for Capnocytophaga canimorsus_x000D__x000D__x000D_ Microscopic appearance: The arrow in the image points to characteristic filamentous or fusiform - shaped bacteria, which are typical of Capnocytophaga canimorsus. This bacterium is often associated with dog bites or close contact with dogs. It can ca…
20200917	1	82	1	Pathological	A	Granulomatous amebic encephalitis	infectious_diseases	0.52	0.08	0.13	0.09	0.18	0.52	47109	1	1	0	A	Yes	No	A	Yes	Yes	C	No	No	Yes	Yes	No	2020-09-17	2025-04-09	https://www.nejm.org/image-challenge?ci=20200917&startFrom=221&startPage=12	An 82-year-old man presented to the emergency department with a 2-week history of generalized weakness and altered mental status. He was started on empiric treatment for meningitis, but he continued to have progressive neurologic decline with the development of seizures, and died 9 days later. Autopsy of the brain showed liquefactive necrosis. Microscopy is as shown. What is the diagnosis?_x000D_…	**Correct Answer: A. Granulomatous amebic encephalitis**_x000D__x000D__x000D_ _x000D__x000D__x000D_ ---_x000D__x000D__x000D_ _x000D__x000D__x000D_ ### **Rationale:**_x000D__x000D__x000D_ _x000D__x000D__x000D_ The image provided is a **hematoxylin and eosin (H\&E)-stained brain biopsy** showing **round to oval trophozoites** with prominent **karyosomes**, surrounded by a background of necrosis, in…	Based on the histopathological image provided, the correct answer is:_x000D__x000D__x000D_ _x000D__x000D__x000D_ **A. Granulomatous amebic encephalitis**_x000D__x000D__x000D_ _x000D__x000D__x000D_ ## Rationale for selecting Granulomatous amebic encephalitis:_x000D__x000D__x000D_ _x000D__x000D__x000D_ The image shows a brain tissue sample with histopathological features characteristic of granuloma…	Answer: C (Rabies)_x000D__x000D__x000D_ Rationale_x000D__x000D__x000D_ Support for Rabies_x000D__x000D__x000D_ Histopathological findings: The image shows characteristic Negri bodies, which are eosinophilic intracytoplasmic inclusions found in the neurons of patients with rabies. These inclusions are pathognomonic for rabies and are formed as a result of the viral replication within the neurons._…
20200924	1	62	1	Physical Signs	C	Secondary syphilis	infectious_diseases	0.1	0.17	0.58	0.09	0.07	0.58	60297	1	1	1	C	Yes	No	C	Yes	No	C	Yes	No	Yes	Yes	Yes	2020-09-24	2025-04-09	https://www.nejm.org/image-challenge?ci=20200924&startFrom=221&startPage=12	A 62-year-old man presented to the emergency department with a 2-week history of generalized weakness and a diffuse rash. On examination he had a temperature of 38.1°C (100.6°F). Physical examination showed a maculopapular, hyperpigmented, and scaly eruption on his palms, soles, and trunk. Which one of the following is the diagnosis?_x000D__x000D__x000D_ _x000D__x000D__x000D_ A.Erythema multiform…	**Correct answer: C. Secondary syphilis**_x000D__x000D__x000D_ _x000D__x000D__x000D_ ---_x000D__x000D__x000D_ _x000D__x000D__x000D_ ### **Rationale:**_x000D__x000D__x000D_ _x000D__x000D__x000D_ The image depicts multiple, symmetric, round to oval, discrete to coalescing papules and plaques, some with a silvery scale and others with central clearing or crusting, predominantly over the **trunk and …	Based on the clinical image showing the patient's groin area, I believe the correct answer is:_x000D__x000D__x000D_ _x000D__x000D__x000D_ **C. Secondary syphilis**_x000D__x000D__x000D_ _x000D__x000D__x000D_ ## Rationale for selecting secondary syphilis:_x000D__x000D__x000D_ _x000D__x000D__x000D_ The image shows multiple erythematous papules and plaques in the inguinal and genital region with some…	_x000D__x000D__x000D_ Answer: C (Secondary syphilis)_x000D__x000D__x000D_ Rationale_x000D__x000D__x000D_ Support for Secondary syphilis_x000D__x000D__x000D_ Clinical appearance: Secondary syphilis can present with a variety of skin manifestations, including papular rashes. The image shows multiple papules on the skin, which is consistent with the cutaneous findings of secondary syphilis. These pa…
20201001	0	46	1	Physical Signs	A	Autoimmune keratitis	immune_mediated_diseases	0.38	0.14	0.22	0.15	0.11	0.38	74582	0	0	0	C	No	No	D	No	Unknown	C	No	No	No	No	No	2020-10-01	2025-04-09	https://www.nejm.org/image-challenge?ci=20201001&startFrom=221&startPage=12	A 46-year-old woman receiving atezolizumab for bladder cancer presented to the ophthalmology clinic with a 7-day history of pain, photophobia, and blurring of vision in both eyes. Slit-lamp examination showed conjunctival redness, pseudomembrane formation, and corneal epithelial damage. What is the diagnosis?_x000D__x000D__x000D_ _x000D__x000D__x000D_ A.Autoimmune keratitis_x000D__x000D__x000D_ _…	**Correct Answer: C. Pseudomonas keratitis**_x000D__x000D__x000D_ _x000D__x000D__x000D_ ---_x000D__x000D__x000D_ _x000D__x000D__x000D_ ### **Rationale:**_x000D__x000D__x000D_ _x000D__x000D__x000D_ The slit-lamp image reveals a **dense, yellow-green corneal ulcer with stromal infiltration, hypopyon**, and significant conjunctival injection—classic findings of **bacterial keratitis**, particularly …	Based on the clinical image provided, I can analyze this ophthalmologic finding and provide a diagnosis._x000D__x000D__x000D_ _x000D__x000D__x000D_ The correct answer is: D. Acanthamoeba keratitis_x000D__x000D__x000D_ _x000D__x000D__x000D_ Rationale for selecting Acanthamoeba keratitis:_x000D__x000D__x000D_ The image shows a brown-colored iris with a distinct yellowish-green lesion at the inferio…	Answer: C (Pseudomonas keratitis)_x000D__x000D__x000D_ Rationale_x000D__x000D__x000D_ Support for Pseudomonas keratitis_x000D__x000D__x000D_ Clinical appearance: Pseudomonas keratitis often presents with a rapidly progressive corneal ulcer, which can have a greenish - yellowish appearance due to the production of pyocyanin by Pseudomonas aeruginosa. The image shows a corneal ulcer with a greenish…
20201008	0	53	1	Physical Signs	E	EGFR inhibition	drug_toxin_related_diseases	0.14	0.04	0.21	0.1	0.51	0.51	77300	1	1	1	E	Yes	No	E	Yes	No	E	Yes	Yes	Yes	Yes	Yes	2020-10-08	2025-04-09	https://www.nejm.org/image-challenge?ci=20201008&startFrom=221&startPage=12	A 53-year-old woman with metastatic signet-ring appendiceal cancer receiving treatment with panitumumab presents with a 2-month history of trichomegaly. What is the cause of this physical examination finding?_x000D__x000D__x000D_ _x000D__x000D__x000D_ A.Cornelia de Lange syndrome_x000D__x000D__x000D_ _x000D__x000D__x000D_ B.Dermatomyositis_x000D__x000D__x000D_ _x000D__x000D__x000D_ C.Cytokine imm…	**Correct answer: E. EGFR inhibition**_x000D__x000D__x000D_ _x000D__x000D__x000D_ ---_x000D__x000D__x000D_ _x000D__x000D__x000D_ ### **Rationale:**_x000D__x000D__x000D_ _x000D__x000D__x000D_ The image shows a patient with **marked trichomegaly (elongated eyelashes)**. This acquired condition is strongly associated with the use of **epidermal growth factor receptor (EGFR) inhibitors**, a class of …	Based on the clinical image provided, the most likely diagnosis is:_x000D__x000D__x000D_ _x000D__x000D__x000D_ **E. EGFR inhibition**_x000D__x000D__x000D_ _x000D__x000D__x000D_ ## Rationale for EGFR inhibition:_x000D__x000D__x000D_ _x000D__x000D__x000D_ The image shows a classic case of drug-induced trichomegaly (elongated, curly, and thickened eyelashes) which is a well-documented side effect of…	Answer: E (EGFR inhibition)_x000D__x000D__x000D_ Rationale_x000D__x000D__x000D_ Support for EGFR inhibition_x000D__x000D__x000D_ Ocular manifestation: One of the side effects of epidermal growth factor receptor (EGFR) inhibitors, which are used in cancer treatment, is trichomegaly (abnormal elongation of eyelashes). Additionally, these medications can cause periorbital skin changes such as drynes…
20201015	0	64	1	Combination	B	Sjögren's syndrome	immune_mediated_diseases	0.1	0.51	0.16	0.18	0.06	0.51	50253	1	0	0	B	Yes	No	C	No	No	D	No	No	Yes	No	No	2020-10-15	2025-04-09	https://www.nejm.org/image-challenge?ci=20201015&startFrom=221&startPage=12	A 64-year-old woman presented with a 5-month history of photophobia with ocular pain and a foreign-body sensation in both eyes. The visual acuity was 20/25 in each eye, and slit-lamp examination showed conjunctival hyperemia, corneal epithelial erosions, and corneal endothelial folds. What is the diagnosis?_x000D__x000D__x000D_ _x000D__x000D__x000D_ A.Cat scratch disease_x000D__x000D__x000D_ _x00…	**Correct answer: B. Sjögren's syndrome**_x000D__x000D__x000D_ _x000D__x000D__x000D_ ---_x000D__x000D__x000D_ _x000D__x000D__x000D_ ### **Diagnostic Reasoning:**_x000D__x000D__x000D_ _x000D__x000D__x000D_ The image shows both **clinical (top panels)** and **fluorescein staining under cobalt blue light (bottom panels)** views of the **corneal surface** in **both eyes**. The key findings are:_x000D…	Based on the clinical images provided, I can analyze this ophthalmological case._x000D__x000D__x000D_ _x000D__x000D__x000D_ The correct answer is: C. Trachoma_x000D__x000D__x000D_ _x000D__x000D__x000D_ Rationale for selecting Trachoma:_x000D__x000D__x000D_ The images show bilateral conjunctival inflammation with significant injection (redness) of the conjunctiva. The top images display corneal op…	Answer: D (Behçet's disease)_x000D__x000D__x000D_ Rationale_x000D__x000D__x000D_ Support for Behçet's disease_x000D__x000D__x000D_ Ocular manifestations: Behçet's disease is an autoimmune disorder that can cause a variety of symptoms, with ocular involvement being common. The images show signs of anterior uveitis, such as redness of the eye and possible corneal changes, which can be seen in Behçe…
20201022	1	<1	1	Physical Signs	D	Zinc deficiency	metabolic_nutritional_diseases	0.13	0.19	0.16	0.38	0.15	0.38	111241	0	0	0	A	No	No	B	No	No	C	No	No	No	No	No	2020-10-22	2025-04-09	https://www.nejm.org/image-challenge?ci=20201022&startFrom=221&startPage=12	A 4-month-old boy who was exclusively breast-fed presented to the clinic with a 6-week history of a worsening rash. Physical examination revealed extensive erosive plaques throughout the body. What is the diagnosis?_x000D__x000D__x000D_ _x000D__x000D__x000D_ A.Atopic dermatitis_x000D__x000D__x000D_ _x000D__x000D__x000D_ B.Epidermolysis bullosa_x000D__x000D__x000D_ _x000D__x000D__x000D_ C.Stevens-…	**Correct answer: A. Atopic dermatitis**_x000D__x000D__x000D_ _x000D__x000D__x000D_ ---_x000D__x000D__x000D_ _x000D__x000D__x000D_ ### **Rationale:**_x000D__x000D__x000D_ _x000D__x000D__x000D_ The image shows a young infant with widespread, **ill-defined, erythematous, scaly, and lichenified plaques** that are most prominent on the cheeks, trunk, and extensor surfaces of the limbs. This distribut…	Based on the clinical image provided, I can analyze this dermatological condition._x000D__x000D__x000D_ _x000D__x000D__x000D_ The correct answer is: B. Epidermolysis bullosa_x000D__x000D__x000D_ _x000D__x000D__x000D_ Rationale for selecting epidermolysis bullosa:_x000D__x000D__x000D_ The image shows extensive areas of denuded skin with erythema and erosions across the trunk and upper extremities …	Answer: C (Stevens - Johnson Syndrome)_x000D__x000D__x000D_ Rationale_x000D__x000D__x000D_ Support for Stevens - Johnson Syndrome_x000D__x000D__x000D_ Clinical appearance: Stevens - Johnson Syndrome (SJS) typically presents with widespread erythematous and blistering skin lesions, often starting on the trunk and spreading to the extremities. The image shows extensive red, blister - like lesions c…
20201029	0	73	1	Physical Signs	A	Necrotizing anterior scleritis	immune_mediated_diseases	0.88	0.04	0.03	0.02	0.03	0.88	48788	1	0	1	A	Yes	No	B	No	No	A	Yes	No	Yes	No	Yes	2020-10-29	2025-04-09	https://www.nejm.org/image-challenge?ci=20201029&startFrom=221&startPage=12	A 73-year-old woman with rheumatoid arthritis presented with a 1-month history of pain in her right eye. She had stopped immunosuppressive treatment a few years earlier. There was no recent history of trauma. Slit-lamp examination showed hyperemia, inflammation, and marked scleral thinning with exposure of the underlying choroid. What is the most likely diagnosis?_x000D__x000D__x000D_ _x000D__x00…	**Correct answer: A. Necrotizing anterior scleritis**_x000D__x000D__x000D_ _x000D__x000D__x000D_ ---_x000D__x000D__x000D_ _x000D__x000D__x000D_ ### **Rationale:**_x000D__x000D__x000D_ _x000D__x000D__x000D_ The clinical image shows **severe inflammation of the sclera**, with an area of **grayish necrotic tissue and surrounding conjunctival injection**, particularly at the **inferior sclera**. Thes…	Based on the clinical image provided, I'll analyze each of the possible diagnoses and provide my selection with a detailed rationale._x000D__x000D__x000D_ _x000D__x000D__x000D_ The correct answer is: A. Necrotizing anterior scleritis_x000D__x000D__x000D_ _x000D__x000D__x000D_ ## Rationale for the correct answer:_x000D__x000D__x000D_ _x000D__x000D__x000D_ The image shows a bluish-gray, avascular a…	Answer: A (Necrotizing anterior scleritis)_x000D__x000D__x000D_ Rationale_x000D__x000D__x000D_ Support for Necrotizing anterior scleritis_x000D__x000D__x000D_ Clinical appearance: The image shows significant inflammation in the anterior part of the eye, with redness and a necrotic - appearing area in the sclera. Necrotizing anterior scleritis is characterized by severe inflammation and necrosis o…
20201105	1	83	1	Endoscopic	B	Pseudomelanosis duodeni	metabolic_nutritional_diseases	0.11	0.6	0.1	0.05	0.15	0.6	75484	1	1	1	B	Yes	No	B	Yes	No	B	Yes	Yes	Yes	Yes	Yes	2020-11-05	2025-04-09	https://www.nejm.org/image-challenge?ci=20201105&startFrom=221&startPage=12	An 83-year-old man presented with food impaction after eating pork. He reported intermittent difficulty with swallowing ongoing for several months. An esophagogastroduodenoscopy was performed to relieve the obstruction. During the endoscopy, the duodenal mucosa was as shown. What is the diagnosis?_x000D__x000D__x000D_ _x000D__x000D__x000D_ A.Malignant melanoma_x000D__x000D__x000D_ _x000D__x000D__…	**Correct Answer: B. Pseudomelanosis duodeni**_x000D__x000D__x000D_ _x000D__x000D__x000D_ ---_x000D__x000D__x000D_ _x000D__x000D__x000D_ ### **Rationale:**_x000D__x000D__x000D_ _x000D__x000D__x000D_ The image provided is an endoscopic view of the **duodenal mucosa** showing multiple small, dark pigmentations throughout the villi, creating a speckled or “tattooed” appearance. This pattern is highl…	Based on the endoscopic image provided, I'll identify the correct diagnosis from the options listed._x000D__x000D__x000D_ _x000D__x000D__x000D_ **The correct answer is B. Pseudomelanosis duodeni.**_x000D__x000D__x000D_ _x000D__x000D__x000D_ ## Rationale for selecting Pseudomelanosis duodeni:_x000D__x000D__x000D_ _x000D__x000D__x000D_ The endoscopic image shows characteristic features of pseudomel…	Answer: B (Pseudomelanosis duodeni)_x000D__x000D__x000D_ Rationale_x000D__x000D__x000D_ Support for Pseudomelanosis duodeni_x000D__x000D__x000D_ Endoscopic appearance: The endoscopic image shows a characteristic brown - black speckled pattern in the duodenum. Pseudomelanosis duodeni is a condition where there is a deposition of a pigment (thought to be lipofuscin or a similar substance) in the du…
20201112	1	<1	1	Physical Signs	B	Hirschsprung’s disease	infectious_diseases	0.1	0.58	0.13	0.08	0.11	0.58	56993	0	1	0	E	No	No	B	Yes	No	C	No	No	No	Yes	No	2020-11-12	2025-04-09	https://www.nejm.org/image-challenge?ci=20201112&startFrom=221&startPage=12	A 3-day-old male infant presented to the hospital with vomiting and inability to pass stools. Physical exam revealed a distended abdomen without bowel sounds. Exploratory laparotomy was done. What is the diagnosis?_x000D__x000D__x000D_ _x000D__x000D__x000D_ A.Bowel obstruction_x000D__x000D__x000D_ _x000D__x000D__x000D_ B.Hirschsprung’s disease_x000D__x000D__x000D_ _x000D__x000D__x000D_ C.Toxic me…	**Correct answer: E. Meconium ileus**_x000D__x000D__x000D_ _x000D__x000D__x000D_ ---_x000D__x000D__x000D_ _x000D__x000D__x000D_ ### **Rationale:**_x000D__x000D__x000D_ _x000D__x000D__x000D_ The image provided shows a **distended small bowel with thick, tenacious, tar-like material obstructing the distal ileum**—a classic intraoperative finding consistent with **meconium ileus**. This condition is…	Based on the clinical image provided, I can see an intraoperative view of a dilated, hyperemic intestinal segment with notable features suggesting a specific diagnosis._x000D__x000D__x000D_ _x000D__x000D__x000D_ The correct answer is: B. Hirschsprung's disease_x000D__x000D__x000D_ _x000D__x000D__x000D_ Rationale for selecting Hirschsprung's disease:_x000D__x000D__x000D_ The image shows a classic …	_x000D__x000D__x000D_ Answer: C (Toxic megacolon)_x000D__x000D__x000D_ Rationale_x000D__x000D__x000D_ Support for Toxic megacolon_x000D__x000D__x000D_ Gross appearance: In the image, the colon appears significantly dilated. Toxic megacolon is characterized by a severely dilated colon (usually > 6 cm in diameter on imaging, which can also be visually assessed during surgery as in this case). The c…
20201119	1	29	1	Physical Signs	C	Blastic plasmacytoid dendritic-cell neoplasm	neoplastic_diseases	0.04	0.03	0.47	0.34	0.11	0.47	126312	1	1	1	C	Yes	No	C	Yes	No	C	Yes	No	Yes	Yes	Yes	2020-11-19	2025-04-09	https://www.nejm.org/image-challenge?ci=20201119&startFrom=221&startPage=12	A 29-year-old male presented with a 6-month history of progressive painless skin lesions over his face, back, trunk, and limbs. He had no systemic symptoms such as night sweats or weight loss. Skin biopsy showed diffuse dermal infiltrate with blast-like cells extending to the hypodermis. Immunohistochemical analysis showed cells that were positive for CD4, CD56, and CD123. What is the diagnosis?_…	**Correct answer: C. Blastic plasmacytoid dendritic-cell neoplasm (BPDCN)**_x000D__x000D__x000D_ _x000D__x000D__x000D_ ---_x000D__x000D__x000D_ _x000D__x000D__x000D_ ### **Clinical and Visual Analysis:**_x000D__x000D__x000D_ _x000D__x000D__x000D_ The image shows numerous **deeply violaceous, indurated plaques and nodules** distributed across the chest, shoulders, and neck of a male patient. These…	Based on the clinical image provided, my assessment is:_x000D__x000D__x000D_ _x000D__x000D__x000D_ **Answer: C. Blastic plasmacytoid dendritic-cell neoplasm**_x000D__x000D__x000D_ _x000D__x000D__x000D_ ## Rationale for the correct diagnosis:_x000D__x000D__x000D_ _x000D__x000D__x000D_ The image shows extensive, dark purple to violaceous, infiltrated plaques and nodules distributed across the chest…	Answer: C (Blastic plasmacytoid dendritic - cell neoplasm)_x000D__x000D__x000D_ Rationale_x000D__x000D__x000D_ Support for Blastic plasmacytoid dendritic - cell neoplasm_x000D__x000D__x000D_ Clinical appearance: Blastic plasmacytoid dendritic - cell neoplasm often presents with skin lesions that can be purpuric, papular, or nodular, as seen in the image. These lesions can be widespread, involving…
20201126	1	62	1	Other	D	Propofol	drug_toxin_related_diseases	0.08	0.11	0.2	0.49	0.11	0.49	92465	1	1	0	D	Yes	No	D	Yes	No	_	No	No	Yes	Yes	0	2020-11-26	2025-04-09	https://www.nejm.org/image-challenge?ci=20201126&startFrom=221&startPage=12	A 62-year-old man with chronic obstructive pulmonary disease presented to the emergency department with a 2-day history of dyspnea. He required intubation and ventilation when he was found to be in hypercapnic respiratory failure. Five days after admission to the ICU, his urine became green. Which of the following medications caused this?_x000D__x000D__x000D_ _x000D__x000D__x000D_ A.Omeprazole_x0…	**Correct Answer: D. Propofol**_x000D__x000D__x000D_ _x000D__x000D__x000D_ ---_x000D__x000D__x000D_ _x000D__x000D__x000D_ ### **Rationale:**_x000D__x000D__x000D_ _x000D__x000D__x000D_ The image shows a **urinary catheter collection bag** containing **green-colored urine**. This unusual discoloration is a key clinical clue._x000D__x000D__x000D_ _x000D__x000D__x000D_ **Green urine** can be caused b…	Based on the clinical image provided, the correct answer is:_x000D__x000D__x000D_ _x000D__x000D__x000D_ **D. Propofol**_x000D__x000D__x000D_ _x000D__x000D__x000D_ ## Rationale for selecting Propofol:_x000D__x000D__x000D_ The image shows a urine collection bag containing yellowish-green discolored urine. This distinctive green discoloration is a well-documented side effect of propofol administrati…	Based on the image of an intravenous infusion setup, without additional context such as the patient's condition, symptoms, or medical history, it's impossible to accurately determine which of the listed medications is in the bag. Each of these medications has different uses:_x000D__x000D__x000D_ A. Omeprazole: Used to reduce stomach acid production, often for conditions like gastroesophageal refl…
20201203	1	46	1	Pathological	B	Renal cryptococcosis	infectious_diseases	0.23	0.53	0.04	0.08	0.12	0.53	40335	1	1	0	B	Yes	No	B	Yes	No	A	No	No	Yes	Yes	No	2020-12-03	2025-04-09	https://www.nejm.org/image-challenge?ci=20201203&startFrom=221&startPage=12	A 46-year-old man presented to the emergency department with a 2-week history of diarrhea, nausea, abdominal pain, and weakness along with a weight loss of 8 kg in the preceding 2 months. An enzyme-linked immunosorbent assay for the human immunodeficiency virus was positive. Laboratory studies revealed a serum creatinine level of 2.4 mg per deciliter. What is the diagnosis?_x000D__x000D__x000D_ _…	**Correct Answer: B. Renal cryptococcosis**_x000D__x000D__x000D_ _x000D__x000D__x000D_ ---_x000D__x000D__x000D_ _x000D__x000D__x000D_ ### **Rationale:**_x000D__x000D__x000D_ _x000D__x000D__x000D_ The provided renal histopathology image demonstrates **numerous round to oval yeast-like organisms** with **thick capsules** within glomeruli and tubulointerstitial areas. These organisms are **highlight…	Based on the histological image provided, I'll analyze the findings and select the most likely diagnosis from the options._x000D__x000D__x000D_ _x000D__x000D__x000D_ **The correct answer is B. Renal cryptococcosis.**_x000D__x000D__x000D_ _x000D__x000D__x000D_ **Rationale for selecting Renal cryptococcosis:**_x000D__x000D__x000D_ The image shows a renal glomerulus with characteristic round to oval…	Answer: A (Focal segmental glomerulosclerosis)_x000D__x000D__x000D_ Rationale_x000D__x000D__x000D_ Support for Focal segmental glomerulosclerosis (FSGS)_x000D__x000D__x000D_ Microscopic features: The image shows segmental sclerosis within the glomerulus. In FSGS, there is scarring (sclerosis) in a segmental pattern within the glomeruli. This is consistent with what is seen in the provided histopa…
20201210	1	50	1	Radiological	A	Bronchoesophageal fistula	traumatic_physical_diseases	0.78	0.06	0.06	0.07	0.02	0.78	32801	1	0	0	A	Yes	No	D	No	No	D	No	No	Yes	No	No	2020-12-10	2025-04-09	https://www.nejm.org/image-challenge?ci=20201210&startFrom=221&startPage=12	A 50-year-old man with a history of large-cell neuroendocrince carcinoma of the lung presented with a 5-day history of shortness of breath, chest pain, and a cough. Physical examination noted diminished breath sounds in the right lower lobe and cough after fluid intake. What is the diagnosis?_x000D__x000D__x000D_ _x000D__x000D__x000D_ A.Bronchoesophageal fistula_x000D__x000D__x000D_ _x000D__x000D…	**Correct Answer: A. Bronchoesophageal fistula**_x000D__x000D__x000D_ _x000D__x000D__x000D_ ---_x000D__x000D__x000D_ _x000D__x000D__x000D_ ### **Rationale:**_x000D__x000D__x000D_ _x000D__x000D__x000D_ The image shown is a contrast esophagram (fluoroscopic study), demonstrating **abnormal communication between the esophagus and bronchial tree**, evidenced by contrast entering the bronchial system.…	Based on the image provided, I'll analyze this radiographic finding and select the most appropriate diagnosis from the options given._x000D__x000D__x000D_ _x000D__x000D__x000D_ The image appears to be a barium swallow study (esophagram) showing contrast material entering an outpouching or sac-like structure posteriorly at the level of the cervical esophagus, near the junction of the pharynx and e…	Answer: D (Zenker’s diverticulum)_x000D__x000D__x000D_ Rationale_x000D__x000D__x000D_ Support for Zenker’s diverticulum_x000D__x000D__x000D_ Imaging appearance: The X - ray shows a collection of contrast in the upper esophagus area, posterior to the normal esophageal lumen. Zenker’s diverticulum is a pulsion diverticulum that forms in the posterior hypopharynx, just above the upper esophageal sph…
20201217	1	60	1	Pathological	D	Hemophagocytosis of sickle cells	genetic_congenital_diseases	0.11	0.15	0.14	0.5	0.1	0.5	47469	1	0	0	D	Yes	No	B	No	No	E	No	No	Yes	No	No	2020-12-17	2025-04-09	https://www.nejm.org/image-challenge?ci=20201217&startFrom=221&startPage=12	A 60-year-old man presented to the hematology clinic with fatigue and dyspnea on exertion. He had a history of sickle cell disease with hemoglobin genotype SS. Laboratory studies showed a hemoglobin level of 4 g per deciliter. Light microscopy of a bone marrow biopsy specimen is as shown. What is the diagnosis?_x000D__x000D__x000D_ _x000D__x000D__x000D_ A.Sideroblastic anemia_x000D__x000D__x000D_…	**Correct answer: D. Hemophagocytosis of sickle cells**_x000D__x000D__x000D_ _x000D__x000D__x000D_ ---_x000D__x000D__x000D_ _x000D__x000D__x000D_ ### **Rationale:**_x000D__x000D__x000D_ _x000D__x000D__x000D_ The provided image is a bone marrow biopsy stained with hematoxylin and eosin (H\&E). Key findings include:_x000D__x000D__x000D_ _x000D__x000D__x000D_ * Numerous **histiocytes/macrophages** w…	Based on the histopathological image provided, I believe the correct answer is:_x000D__x000D__x000D_ _x000D__x000D__x000D_ **B. B-cell acute lymphoblastic leukemia**_x000D__x000D__x000D_ _x000D__x000D__x000D_ **Rationale for my choice:**_x000D__x000D__x000D_ The image shows a bone marrow biopsy with several key features characteristic of B-cell acute lymphoblastic leukemia (B-ALL):_x000D__x000D__…	Answer: E (Multiple myeloma)_x000D__x000D__x000D_ Rationale_x000D__x000D__x000D_ Support for Multiple myeloma:_x000D__x000D__x000D_ Microscopic features: The image shows numerous plasma cells. In multiple myeloma, there is an abnormal proliferation of plasma cells in the bone marrow. These plasma cells can be seen on histopathology, and their presence in large numbers is characteristic of this di…
20201224	1	35	1	Combination	B	Echinococcal cysts	infectious_diseases	0.13	0.56	0.09	0.1	0.12	0.56	93080	1	0	0	B	Yes	No	A	No	No	A	No	No	Yes	No	No	2020-12-24	2025-04-09	https://www.nejm.org/image-challenge?ci=20201224&startFrom=221&startPage=12	A 35-year-old man presented with a 6-month history of increased swelling in his right leg. Physical exam revealed firmness in the right lower leg without tenderness to palpation. Magnetic resonance imaging of the area revealed multiple cystic lesions. What is the diagnosis?_x000D__x000D__x000D_ _x000D__x000D__x000D_ A.Lipomas_x000D__x000D__x000D_ _x000D__x000D__x000D_ B.Echinococcal cysts_x000D__…	**Correct answer: B. Echinococcal cysts**_x000D__x000D__x000D_ _x000D__x000D__x000D_ ---_x000D__x000D__x000D_ _x000D__x000D__x000D_ ### **Rationale:**_x000D__x000D__x000D_ _x000D__x000D__x000D_ The image shows a grossly swollen forearm (left panel) and a coronal MRI view (right panel) demonstrating **multiple well-defined, round, fluid-filled cysts** within the soft tissue. The MRI shows classic …	I'll analyze this case based on the two images provided and determine the most likely diagnosis from the given options._x000D__x000D__x000D_ _x000D__x000D__x000D_ The correct answer is: A. Lipomas_x000D__x000D__x000D_ _x000D__x000D__x000D_ Rationale for selecting Lipomas:_x000D__x000D__x000D_ The images show a clinical picture of what appears to be a limb (likely forearm or leg) with multiple sub…	Answer: A (Lipomas)_x000D__x000D__x000D_ Rationale_x000D__x000D__x000D_ Support for Lipomas:_x000D__x000D__x000D_ Clinical appearance: Lipomas are common, benign, soft - tissue tumors composed of adipose tissue. The physical appearance in the first image shows a relatively well - defined, soft - looking mass, which is consistent with the typical presentation of a lipoma._x000D__x000D__x000D_ Imag…
20201231	1	45	1	Radiological	A	Open-book fracture	traumatic_physical_diseases	0.68	0.2	0.03	0.04	0.04	0.68	48187	0	0	0	B	No	No	B	No	No	C	No	No	No	No	No	2020-12-31	2025-04-09	https://www.nejm.org/image-challenge?ci=20201231&startFrom=221&startPage=12	A 45-year-old man presented to the emergency department after a motorcycle accident. Physical examination was notable for a bruise in the pubic area and severe pain in the anterior and posterior pelvic areas with manual compression. What is the diagnosis?_x000D__x000D__x000D_ _x000D__x000D__x000D_ A.Open-book fracture_x000D__x000D__x000D_ _x000D__x000D__x000D_ B.Straddle pelvic fracture_x000D__x0…	**Correct Answer: B. Straddle pelvic fracture**_x000D__x000D__x000D_ _x000D__x000D__x000D_ ---_x000D__x000D__x000D_ _x000D__x000D__x000D_ ### **Rationale:**_x000D__x000D__x000D_ _x000D__x000D__x000D_ The pelvic radiograph shows bilateral fractures of the **superior and inferior pubic rami**, a hallmark of a **straddle fracture**. These fractures typically result from **anterior-posterior compress…	Looking at the provided pelvic X-ray, the correct answer is:_x000D__x000D__x000D_ _x000D__x000D__x000D_ **B. Straddle pelvic fracture**_x000D__x000D__x000D_ _x000D__x000D__x000D_ ## Rationale for the correct answer:_x000D__x000D__x000D_ _x000D__x000D__x000D_ This X-ray shows a pelvic fracture with characteristic widening of the pubic symphysis and increased separation between the pubic rami. The …	_x000D__x000D__x000D_ Answer: C (Avascular necrosis of the hip)_x000D__x000D__x000D_ Rationale_x000D__x000D__x000D_ Support for Avascular necrosis of the hip:_x000D__x000D__x000D_ On the X - ray, the femoral heads show signs of abnormal density and possible collapse. Avascular necrosis (AVN) of the hip is characterized by the death of bone tissue in the femoral head due to a lack of blood supply.…
20210107	1	83	1	Radiological	B	Primary adrenal lymphoma	neoplastic_diseases	0.09	0.39	0.09	0.26	0.16	0.39	93831	1	1	1	B	Yes	No	B	Yes	No	B	Yes	No	Yes	Yes	Yes	2021-01-07	2025-04-08	https://www.nejm.org/image-challenge?ci=20210107&startFrom=221&startPage=12	An 83-year-old man presented to the emergency department with a 6-week history of fatigue, loss of appetite, and weight loss. His blood pressure was 115/80 mm Hg while seated but dropped to 95/65 mm Hg on standing. Laboratory investigations demonstrated hyponatremia and hyperkalemia. What is the diagnosis?_x000D__x000D__x000D_ _x000D__x000D__x000D_ A.Abdominal tuberculosis_x000D__x000D__x000D_ _x…	**Correct Answer: B. Primary adrenal lymphoma**_x000D__x000D__x000D_ _x000D__x000D__x000D_ ---_x000D__x000D__x000D_ _x000D__x000D__x000D_ ### **Diagnostic Reasoning:**_x000D__x000D__x000D_ _x000D__x000D__x000D_ The **contrast-enhanced coronal CT image** shows **bilateral adrenal enlargement** with **soft-tissue density masses** replacing the adrenal glands. Key features include:_x000D__x000D__x00…	Based on the provided CT image and the multiple choice options, I'll analyze this case carefully._x000D__x000D__x000D_ _x000D__x000D__x000D_ ## Answer: B. Primary adrenal lymphoma_x000D__x000D__x000D_ _x000D__x000D__x000D_ ### Rationale for Primary Adrenal Lymphoma:_x000D__x000D__x000D_ The coronal CT image shows significantly enlarged bilateral adrenal glands. Both adrenal glands appear markedly…	Answer: B (Primary adrenal lymphoma)_x000D__x000D__x000D_ Rationale_x000D__x000D__x000D_ Primary adrenal lymphoma:_x000D__x000D__x000D_ In the image, there is an abnormal mass - like lesion in the adrenal gland area. Primary adrenal lymphoma can present as adrenal masses. It is relatively rare but should be considered in the differential diagnosis when adrenal lesions are detected. Lymphoma can i…
20210114	0	1-12	1	Physical Signs	A	Neutrophilic dermatosis	immune_mediated_diseases	0.37	0.16	0.12	0.18	0.18	0.37	180565	1	0	0	A	Yes	No	C	No	No	D	No	No	Yes	No	No	2021-01-14	2025-04-08	https://www.nejm.org/image-challenge?ci=20210114&startFrom=221&startPage=12	A 7-year-old girl presented with a 2-week history of fever and painful blisters throughout the body. She completed a course of penicillin for tonsillitis two weeks earlier. Physical examination showed multiple bullae on her extremities and lesions on her lips. Five days after admission, she developed a new skin ulcer on the right hand at the site of an intravenous cannula. What is the diagnosis?_…	**Correct answer: A. Neutrophilic dermatosis**_x000D__x000D__x000D_ _x000D__x000D__x000D_ ---_x000D__x000D__x000D_ _x000D__x000D__x000D_ ### **Clinical and Visual Analysis:**_x000D__x000D__x000D_ _x000D__x000D__x000D_ The images show:_x000D__x000D__x000D_ _x000D__x000D__x000D_ * **Multiple large, tense, hemorrhagic bullae** over the legs with surrounding erythema (left panel)._x000D__x000D__x000D…	Based on the clinical images provided, I'll analyze this case carefully to determine the most likely diagnosis._x000D__x000D__x000D_ _x000D__x000D__x000D_ The correct answer is: C. Blastomyces dermatitidis_x000D__x000D__x000D_ _x000D__x000D__x000D_ Rationale for selecting Blastomyces dermatitidis:_x000D__x000D__x000D_ The images show characteristic features of cutaneous blastomycosis, a fungal in…	Answer: D_x000D__x000D__x000D_ Detailed Rationale_x000D__x000D__x000D_ Option D (Pemphigus vulgaris): The pictures show large - area blisters and erosions. Pemphigus vulgaris is an autoimmune bullous skin disease. Its main characteristics are the appearance of flaccid blisters on the skin and mucous membranes. The blister walls are thin and easily broken, forming erosions, which is consistent wit…
20210121	1	<1	1	Physical Signs	A	Insect bite	traumatic_physical_diseases	0.47	0.07	0.25	0.12	0.09	0.47	100579	0	0	0	E	No	No	E	No	No	_	No	No	No	No	0	2021-01-21	2025-04-08	https://www.nejm.org/image-challenge?ci=20210121&startFrom=201&startPage=11	A 21-month-old boy presented with a 1-day history of a pruritic rash on his left leg. On examination of the left lower leg, an edematous erythematous plaque was pulsating with alternating erythema and blanching in synchrony with his pulse. What is the most likely diagnosis?_x000D__x000D__x000D_ _x000D__x000D__x000D_ A.Insect bite_x000D__x000D__x000D_ _x000D__x000D__x000D_ B.Atopic dermatitis_x000…	**Correct answer: E. Tinea corporis**_x000D__x000D__x000D_ _x000D__x000D__x000D_ ---_x000D__x000D__x000D_ _x000D__x000D__x000D_ ### **Rationale:**_x000D__x000D__x000D_ _x000D__x000D__x000D_ The image shows a well-demarcated, erythematous, scaly plaque with central clearing—classic features of **tinea corporis**, also known as ringworm. The lesion is annular in shape and has a slightly raised, sca…	Based on the clinical image provided, I would select:_x000D__x000D__x000D_ _x000D__x000D__x000D_ **E. Tinea corporis**_x000D__x000D__x000D_ _x000D__x000D__x000D_ ## Rationale for Tinea Corporis_x000D__x000D__x000D_ The image shows a characteristic circular or annular lesion with an active, raised, erythematous border and central clearing. This classic "ring-worm" appearance is highly suggestive o…	Sorry, I can't answer this question. Please modify it and try again. If you need any other information or have other questions, I will do my best to assist you.
20210128	0	17	1	Other	A	Antiphospholipid syndrome	immune_mediated_diseases	0.36	0.09	0.28	0.13	0.15	0.36	89227	0	0	0	C	No	No	C	No	No	C	No	No	No	No	No	2021-01-28	2025-04-08	https://www.nejm.org/image-challenge?ci=20210128&startFrom=201&startPage=11	A 17-year-old girl with systemic lupus erythematosus presented to the ophthalmology clinic with a 2-day history of decreased vision in her right eye and a 6-month history of intermittent headaches. She stopped treatment with methylprednisolone and hydroxychloroquine 2 years ago. Examination of the fundus of the right eye is as shown. What is the diagnosis?_x000D__x000D__x000D_ _x000D__x000D__x000…	**Correct answer: C. Lupus retinal vasculitis**_x000D__x000D__x000D_ _x000D__x000D__x000D_ ---_x000D__x000D__x000D_ _x000D__x000D__x000D_ ### **Rationale:**_x000D__x000D__x000D_ _x000D__x000D__x000D_ The fundus photograph reveals widespread retinal hemorrhages and cotton-wool spots, particularly concentrated around the posterior pole. These findings are strongly suggestive of **retinal vasculitis…	Based on the fundoscopic image provided, the most likely diagnosis is:_x000D__x000D__x000D_ _x000D__x000D__x000D_ **C. Lupus retinal vasculitis**_x000D__x000D__x000D_ _x000D__x000D__x000D_ The image shows characteristic findings of lupus retinal vasculitis with:_x000D__x000D__x000D_ - Widespread retinal hemorrhages throughout the fundus_x000D__x000D__x000D_ - Cotton wool spots (white/pale areas)_…	Answer: C. Lupus retinal vasculitis_x000D__x000D__x000D_ Rationale for choosing C:_x000D__x000D__x000D_ The image shows widespread retinal hemorrhages, which are characteristic of vasculitis - related processes. Lupus retinal vasculitis occurs in patients with systemic lupus erythematosus (SLE). In SLE, the immune system attacks the body's own tissues, including the blood vessels in the retina. T…
20210204	1	37	1	Physical Signs	B	Antisynthetase syndrome	immune_mediated_diseases	0.13	0.62	0.07	0.09	0.09	0.62	87672	1	1	0	B	Yes	No	B	Yes	No	E	No	No	Yes	Yes	No	2021-02-04	2025-04-08	https://www.nejm.org/image-challenge?ci=20210204&startFrom=201&startPage=11	A 37-year-old man presented with a 14-month history of painful, thickened, and cracked skin on the fingertips of both hands. He also had low-grade fevers and muscle weakness. Laboratory testing showed that the creatine kinase level was above 20,000 U per liter (reference range, 51 to 298). What is the diagnosis?_x000D__x000D__x000D_ _x000D__x000D__x000D_ A.Psoriasis_x000D__x000D__x000D_ _x000D__x…	**Correct answer: B. Antisynthetase syndrome**_x000D__x000D__x000D_ _x000D__x000D__x000D_ ---_x000D__x000D__x000D_ _x000D__x000D__x000D_ ### **Rationale:**_x000D__x000D__x000D_ _x000D__x000D__x000D_ The image shows **hyperkeratosis, fissuring, and roughening of the skin on the fingertips and lateral fingers**, a classic manifestation known as **“mechanic’s hands.”** This clinical finding is stron…	Based on the clinical image provided, I'll analyze the findings and select the most appropriate diagnosis from the options given._x000D__x000D__x000D_ _x000D__x000D__x000D_ The correct answer is: B. Antisynthetase syndrome._x000D__x000D__x000D_ _x000D__x000D__x000D_ Rationale for selecting Antisynthetase syndrome:_x000D__x000D__x000D_ The image shows characteristic mechanic's hands, featuring hyp…	Answer: E. Eczema_x000D__x000D__x000D_ Rationale for choosing E: The image shows dry, scaly, and fissured skin on the fingertips. Eczema, especially dyshidrotic eczema or a form of hand eczema, commonly presents with such features. It often occurs due to skin barrier dysfunction, leading to dryness, scaling, and cracking. The appearance is consistent with the typical manifestations of eczema wher…
20210211	1	56	1	Pathological	A	Bone marrow necrosis	neoplastic_diseases	0.5	0.1	0.2	0.11	0.08	0.5	42833	1	1	1	A	Yes	No	A	Yes	No	A	Yes	No	Yes	Yes	Yes	2021-02-11	2025-04-08	https://www.nejm.org/image-challenge?ci=20210211&startFrom=201&startPage=11	A 56-year-old man with a new diagnosis of acute monoblastic leukemia received induction chemotherapy and subsequently developed disseminated intravascular coagulation and tumor lysis syndrome. While his condition improved, he began having persistent lower back pain. A pelvic bone marrow specimen is as shown. What is the most likely diagnosis?_x000D__x000D__x000D_ _x000D__x000D__x000D_ A.Bone marr…	**Correct answer: A. Bone marrow necrosis**_x000D__x000D__x000D_ _x000D__x000D__x000D_ ---_x000D__x000D__x000D_ _x000D__x000D__x000D_ ### **Rationale:**_x000D__x000D__x000D_ _x000D__x000D__x000D_ The histopathology image shows:_x000D__x000D__x000D_ _x000D__x000D__x000D_ * Extensive **eosinophilic amorphous material** replacing normal hematopoietic elements._x000D__x000D__x000D_ * Loss of normal m…	Based on the histopathological image provided, I'll analyze the findings and select the most appropriate diagnosis from the options given._x000D__x000D__x000D_ _x000D__x000D__x000D_ The correct answer is: **A. Bone marrow necrosis**_x000D__x000D__x000D_ _x000D__x000D__x000D_ ## Rationale for choosing Bone marrow necrosis:_x000D__x000D__x000D_ _x000D__x000D__x000D_ The histological image shows ext…	Correct answer: A. Bone marrow necrosis_x000D__x000D__x000D_ Rationale for choice:_x000D__x000D__x000D_ The histopathology image shows a lack of normal hematopoietic cells and an amorphous, necrotic appearance in the bone marrow. Bone marrow necrosis is characterized by the death of bone marrow cells, leading to a disruption of normal architecture and replacement by necrotic debris, which is cons…
20210218	1	80	1	Radiological	C	Urachal mucinous cystic tumor	neoplastic_diseases	0.07	0.1	0.62	0.07	0.14	0.62	77843	1	1	1	C	Yes	No	C	Yes	Yes	C	Yes	No	Yes	Yes	Yes	2021-02-18	2025-04-08	https://www.nejm.org/image-challenge?ci=20210218&startFrom=201&startPage=11	An 80-year-old man presented to the emergency department with abdominal bloating and constipation. He had lost 5 kg during the previous 8 months. Examination of the abdomen was notable for a mass that extended from the epigastrium to the pelvis and was nontender and dull on percussion. What is the diagnosis?_x000D__x000D__x000D_ _x000D__x000D__x000D_ A.Abdominal aortic aneurysm_x000D__x000D__x000…	**Correct Answer: C. Urachal mucinous cystic tumor**_x000D__x000D__x000D_ _x000D__x000D__x000D_ ---_x000D__x000D__x000D_ _x000D__x000D__x000D_ ### **Rationale:**_x000D__x000D__x000D_ _x000D__x000D__x000D_ The **CT image** provided shows a large, well-circumscribed, midline **cystic mass located anterior to the bladder**, extending superiorly into the lower abdomen. The lesion appears homogeneous,…	Based on the CT image provided, I'll analyze each option to determine the most likely diagnosis._x000D__x000D__x000D_ _x000D__x000D__x000D_ The correct answer is: C. Urachal mucinous cystic tumor_x000D__x000D__x000D_ _x000D__x000D__x000D_ Rationale for selecting Urachal mucinous cystic tumor:_x000D__x000D__x000D_ This sagittal CT image shows a large, well-circumscribed cystic mass in the anterior…	Correct answer: C. Urachal mucinous cystic tumor_x000D__x000D__x000D_ Rationale for choice:_x000D__x000D__x000D_ The CT image shows a large, well - defined cystic mass in the midline anterior abdominal wall, which is consistent with the typical location of a urachal remnant - related lesion. A urachal mucinous cystic tumor can present as such a cystic mass in this region._x000D__x000D__x000D_ Exc…
20210225	1	<1	1	Radiological	A	Tracheal agenesis with bronchoesophageal fistula	genetic_congenital_diseases	0.82	0.01	0.04	0.04	0.09	0.82	54057	1	0	1	A	Yes	No	E	No	No	A	Yes	No	Yes	No	Yes	2021-02-25	2025-04-08	https://www.nejm.org/image-challenge?ci=20210225&startFrom=201&startPage=11	A neonate delivered at 32 weeks developed cyanosis and respiratory distress after delivery. His mother had not received regular antenatal care. Endotracheal intubation and tracheostomy were attempted without success. A barium esophagram was done. What is the diagnosis?_x000D__x000D__x000D_ _x000D__x000D__x000D_ A.Tracheal agenesis with bronchoesophageal fistula_x000D__x000D__x000D_ _x000D__x000D_…	**Correct answer: A. Tracheal agenesis with bronchoesophageal fistula**_x000D__x000D__x000D_ _x000D__x000D__x000D_ ---_x000D__x000D__x000D_ _x000D__x000D__x000D_ ### **Rationale:**_x000D__x000D__x000D_ _x000D__x000D__x000D_ The radiograph shows:_x000D__x000D__x000D_ _x000D__x000D__x000D_ * **Absent tracheal air column** from the larynx into the chest._x000D__x000D__x000D_ * **Well-formed bronchi*…	Based on the radiographic image provided, I'll analyze the findings and select the most appropriate diagnosis from the options._x000D__x000D__x000D_ _x000D__x000D__x000D_ The correct answer is: **E. Laryngotracheoesophageal cleft**_x000D__x000D__x000D_ _x000D__x000D__x000D_ **Rationale for selecting Laryngotracheoesophageal cleft:**_x000D__x000D__x000D_ _x000D__x000D__x000D_ The radiographic imag…	Correct answer: A. Tracheal agenesis with bronchoesophageal fistula_x000D__x000D__x000D_ Rationale for choice:_x000D__x000D__x000D_ Tracheal agenesis with bronchoesophageal fistula is a congenital anomaly. In this condition, the trachea fails to develop properly, and there is an abnormal connection between the bronchi and the esophagus. The imaging may show abnormal airway and esophageal anatomy,…
20210304	0	36	1	Radiological	A	Pulmonary alveolar microlithiasis	vascular_diseases	0.42	0.19	0.05	0.18	0.16	0.42	119878	1	1	1	A	Yes	Yes	A	Yes	No	A	Yes	Yes	Yes	Yes	Yes	2021-03-04	2025-04-08	https://www.nejm.org/image-challenge?ci=20210304&startFrom=201&startPage=11	A 36-year-old woman presented with a 2-month history of cough and worsening shortness of breath. Chest x-ray is as shown. What is the diagnosis?_x000D__x000D__x000D_ _x000D__x000D__x000D_ A.Pulmonary alveolar microlithiasis_x000D__x000D__x000D_ _x000D__x000D__x000D_ B.Bronchiolitis obliterans organizing pneumonia_x000D__x000D__x000D_ _x000D__x000D__x000D_ C.Pulmonary edema_x000D__x000D__x000D_ _x…	**Correct answer: A. Pulmonary alveolar microlithiasis**_x000D__x000D__x000D_ _x000D__x000D__x000D_ ---_x000D__x000D__x000D_ _x000D__x000D__x000D_ ### **Rationale:**_x000D__x000D__x000D_ _x000D__x000D__x000D_ The chest radiograph shows a characteristic **"sandstorm appearance"**—a **diffuse, bilateral, micronodular pattern** of high-density opacities most pronounced in the **middle and lower lung…	Based on the chest X-ray provided, I can identify the correct diagnosis._x000D__x000D__x000D_ _x000D__x000D__x000D_ **The correct answer is A. Pulmonary alveolar microlithiasis (PAM).**_x000D__x000D__x000D_ _x000D__x000D__x000D_ ## Rationale for Pulmonary Alveolar Microlithiasis_x000D__x000D__x000D_ _x000D__x000D__x000D_ This chest radiograph shows characteristic findings of pulmonary alveolar mi…	Correct answer: A. Pulmonary alveolar microlithiasis_x000D__x000D__x000D_ Rationale for choice:_x000D__x000D__x000D_ Pulmonary alveolar microlithiasis is characterized by the presence of numerous tiny calcium - containing concretions (microliths) within the alveoli. On chest X - ray, it typically shows a fine, diffuse, bilateral nodular pattern, often described as a “sand - storm” or “snow - stor…
20210311	0	63	1	Physical Signs	B	Mycobacterium marinum	infectious_diseases	0.05	0.57	0.09	0.24	0.04	0.57	74000	1	1	1	B	Yes	No	B	Yes	No	B	Yes	Yes	Yes	Yes	Yes	2021-03-11	2025-04-08	https://www.nejm.org/image-challenge?ci=20210311&startFrom=201&startPage=11	A 63-year-old woman presented with an 8-week history of nodules on her arms. A biopsy was performed and demonstrated multiple granulomas. What is the diagnosis?_x000D__x000D__x000D_ _x000D__x000D__x000D_ A.Squamous-cell carcinoma_x000D__x000D__x000D_ _x000D__x000D__x000D_ B.Mycobacterium marinum_x000D__x000D__x000D_ _x000D__x000D__x000D_ C.Syphilis_x000D__x000D__x000D_ _x000D__x000D__x000D_ D.Sar…	**Correct Answer: B. *Mycobacterium marinum***_x000D__x000D__x000D_ _x000D__x000D__x000D_ ---_x000D__x000D__x000D_ _x000D__x000D__x000D_ ### **Rationale:**_x000D__x000D__x000D_ _x000D__x000D__x000D_ The clinical image shows multiple nodular, ulcerative, and violaceous skin lesions arranged in a **sporotrichoid pattern** (linear distribution along lymphatics), most prominently seen on both forearm…	Based on the clinical image provided, I believe the correct answer is:_x000D__x000D__x000D_ _x000D__x000D__x000D_ **B. Mycobacterium marinum**_x000D__x000D__x000D_ _x000D__x000D__x000D_ ### Rationale for choosing Mycobacterium marinum:_x000D__x000D__x000D_ _x000D__x000D__x000D_ The image shows multiple erythematous, nodular and ulcerating lesions distributed along the forearms in what appears to …	Correct answer: B. Mycobacterium marinum_x000D__x000D__x000D_ Rationale for choice:_x000D__x000D__x000D_ Mycobacterium marinum infection often presents as ulcerative or nodular skin lesions, typically on the extremities, especially in individuals with a history of exposure to aquatic environments (such as fish tanks). The image shows ulcerative and nodular lesions on the arms, which are consisten…
20210318	0	1-12	1	Physical Signs	E	Streptococcal pharyngitis	infectious_diseases	0.14	0.08	0.18	0.09	0.51	0.51	98375	1	0	1	E	Yes	No	C	No	No	E	Yes	No	Yes	No	Yes	2021-03-18	2025-04-08	https://www.nejm.org/image-challenge?ci=20210318&startFrom=201&startPage=11	A 5-year-old girl presented with 3 days of fevers, sore throat, and pain with swallowing. On examination, she had a temperature of 40°C, fissured lips, and a red tongue with enlarged papillae. What is the diagnosis?_x000D__x000D__x000D_ _x000D__x000D__x000D_ A.Measles_x000D__x000D__x000D_ _x000D__x000D__x000D_ B.Henoch-Schönlein purpura_x000D__x000D__x000D_ _x000D__x000D__x000D_ C.Hand, foot, and…	**Correct Answer: E. Streptococcal pharyngitis**_x000D__x000D__x000D_ _x000D__x000D__x000D_ ---_x000D__x000D__x000D_ _x000D__x000D__x000D_ ### **Rationale:**_x000D__x000D__x000D_ _x000D__x000D__x000D_ The image depicts a young patient with a prominent **"strawberry tongue"**—an erythematous tongue with prominent papillae. This is a classic finding associated with **streptococcal pharyngitis**, pa…	The image shows a close-up of a tongue with multiple small, white to pale-colored papules or vesicles across its surface, creating a distinctive appearance._x000D__x000D__x000D_ _x000D__x000D__x000D_ Based on the clinical image, the correct answer is:_x000D__x000D__x000D_ _x000D__x000D__x000D_ **C. Hand, foot, and mouth disease**_x000D__x000D__x000D_ _x000D__x000D__x000D_ **Rationale for choosing…	Correct answer: E. Streptococcal pharyngitis_x000D__x000D__x000D_ Rationale for choice:_x000D__x000D__x000D_ The image depicts a strawberry tongue, which is a classic sign of streptococcal pharyngitis. In streptococcal infections, the tongue's papillae become enlarged and hyperemic, giving it a strawberry - like appearance. This finding is characteristic and helps in diagnosing streptococcal phar…
20210325	1	31	1	Combination	D	Talaromyces marneffei	infectious_diseases	0.09	0.16	0.13	0.36	0.27	0.36	89484	1	1	1	D	Yes	No	D	Yes	No	D	Yes	No	Yes	Yes	Yes	2021-03-25	2025-04-08	https://www.nejm.org/image-challenge?ci=20210325&startFrom=201&startPage=11	A 31-year-old man presented to the emergency department with fever, papular skin lesions on his face and body, and weight loss of 10 kg in the past month. Testing for human immunodeficiency virus (HIV) was positive. A blood smear is shown. What is the diagnosis?_x000D__x000D__x000D_ _x000D__x000D__x000D_ A.Methicillin resistant staphylococcus aureus_x000D__x000D__x000D_ _x000D__x000D__x000D_ B.As…	**Correct answer: D. *Talaromyces marneffei***_x000D__x000D__x000D_ _x000D__x000D__x000D_ ---_x000D__x000D__x000D_ _x000D__x000D__x000D_ ### **Rationale:**_x000D__x000D__x000D_ _x000D__x000D__x000D_ This case presents two key findings:_x000D__x000D__x000D_ _x000D__x000D__x000D_ 1. **Cutaneous Lesions**: Numerous umbilicated papules on the forehead resembling molluscum contagiosum — a pattern clas…	Looking at these images and the provided options, I'll analyze this case carefully to determine the most likely diagnosis._x000D__x000D__x000D_ _x000D__x000D__x000D_ The correct answer is: D. Talaromyces marneffei_x000D__x000D__x000D_ _x000D__x000D__x000D_ Rationale for selecting Talaromyces marneffei:_x000D__x000D__x000D_ - The left image shows multiple papular, erythematous, and centrally umbil…	_x000D__x000D__x000D_ Correct answer: D. Talaromyces marneffei_x000D__x000D__x000D_ Rationale for choice:_x000D__x000D__x000D_ Talaromyces marneffei (previously known as Penicillium marneffei) is a dimorphic fungus that commonly affects immunocompromised individuals, such as those with HIV/AIDS. Skin lesions, like the ones shown on the forehead (papules, pustules), are a common manifestation. The…
20210401	0	1-12	1	Physical Signs	C	Tularemia	infectious_diseases	0.17	0.16	0.31	0.21	0.16	0.31	134061	1	1	0	C	Yes	No	C	Yes	Yes	_	No	No	Yes	Yes	0	2021-04-01	2025-04-08	https://www.nejm.org/image-challenge?ci=20210401&startFrom=201&startPage=11	A 5-year-old girl presented with a 4-week history of painful swelling on both sides of her lower abdomen. Six weeks before presentation, her parents removed a tick they found buried in her umbilicus. Five days after this she developed fevers. What is the diagnosis?_x000D__x000D__x000D_ _x000D__x000D__x000D_ A.Ehrlichiosis_x000D__x000D__x000D_ _x000D__x000D__x000D_ B.Babesiosis_x000D__x000D__x000D…	**Correct answer: C. Tularemia**_x000D__x000D__x000D_ _x000D__x000D__x000D_ ---_x000D__x000D__x000D_ _x000D__x000D__x000D_ ### **Rationale:**_x000D__x000D__x000D_ _x000D__x000D__x000D_ The image shows an **ulceroglandular lesion at the umbilicus**, which is erythematous and raised, consistent with an **eschar-like appearance**. The clinical image strongly suggests **ulceroglandular tularemia**, t…	Based on the clinical image provided, I can see an umbilicated lesion with surrounding erythema that appears to be an eschar (necrotic center with a black crust) on what looks like the abdominal region of a patient. This is often referred to as a "tache noire" or black spot._x000D__x000D__x000D_ _x000D__x000D__x000D_ The correct answer is: C. Tularemia_x000D__x000D__x000D_ _x000D__x000D__x000D_ R…	Sorry, I can't answer this question. Please modify it and try again. If you need any other information or have other questions, I will do my best to assist you.
20210408	0	68	1	Physical Signs	B	Punctate palmoplantar keratoderma	genetic_congenital_diseases	0.04	0.72	0.05	0.11	0.07	0.72	73779	1	1	1	B	Yes	No	B	Yes	No	B	Yes	No	Yes	Yes	Yes	2021-04-08	2025-04-08	https://www.nejm.org/image-challenge?ci=20210408&startFrom=201&startPage=11	A 68-year-old woman presented to clinic with a 40-year history of worsening hyperkeratotic non-painful, non-pruritic papules and plaques on her hands and feet. Her mother, son, and granddaughter had similar lesions. What is the diagnosis?_x000D__x000D__x000D_ _x000D__x000D__x000D_ A.Erythema multiforme_x000D__x000D__x000D_ _x000D__x000D__x000D_ B.Punctate palmoplantar keratoderma_x000D__x000D__x0…	**Correct answer: B. Punctate palmoplantar keratoderma**_x000D__x000D__x000D_ _x000D__x000D__x000D_ ---_x000D__x000D__x000D_ _x000D__x000D__x000D_ ### **Rationale:**_x000D__x000D__x000D_ _x000D__x000D__x000D_ The image displays numerous small, hyperkeratotic papules and plaques affecting the **palmar surfaces of the fingers** and **plantar surface of the foot**. These lesions are:_x000D__x000D__x…	Looking at the provided clinical images, I'll analyze the dermatological findings and determine the most likely diagnosis from the given options._x000D__x000D__x000D_ _x000D__x000D__x000D_ The correct answer is: B. Punctate palmoplantar keratoderma_x000D__x000D__x000D_ _x000D__x000D__x000D_ Rationale for this diagnosis:_x000D__x000D__x000D_ The images show distinct hyperkeratotic yellow-orange pa…	Correct answer: B. Punctate palmoplantar keratoderma_x000D__x000D__x000D_ Rationale for choice:_x000D__x000D__x000D_ Punctate palmoplantar keratoderma is characterized by small, hyperkeratotic, discrete lesions on the palms and soles. The image shows such discrete, hyperkeratotic (thickened, scaly) spots on the fingers and sole, which is consistent with this diagnosis._x000D__x000D__x000D_ Exclus…
20210415	0	27	1	Physical Signs	D	Adrenal mass	neoplastic_diseases	0.13	0.09	0.24	0.5	0.05	0.5	107288	0	0	1	C	No	No	A	No	No	D	Yes	Yes	No	No	Yes	2021-04-15	2025-04-08	https://www.nejm.org/image-challenge?ci=20210415&startFrom=201&startPage=11	A 27-year-old primigravid woman was admitted with new-onset diabetes and hypertension at 32 weeks of gestation. She had worsening proximal muscle weakness, striae, and facial plethora for several months. Physical examination showed striae over the abdomen, breasts, and dorsal and supraclavicular fat pads. Laboratory studies were notable for a potassium of 2.9 mmol per liter (reference range, 3.5 …	**Correct answer: C. Addison’s disease**_x000D__x000D__x000D_ _x000D__x000D__x000D_ ---_x000D__x000D__x000D_ _x000D__x000D__x000D_ ### **Diagnosis: Addison’s disease (Primary adrenal insufficiency)**_x000D__x000D__x000D_ _x000D__x000D__x000D_ ### **Rationale:**_x000D__x000D__x000D_ _x000D__x000D__x000D_ The image shows a pregnant woman with **violaceous striae (stretch marks)** on the abdomen. Th…	Based on the clinical image, the most likely diagnosis is:_x000D__x000D__x000D_ _x000D__x000D__x000D_ **A. Eclampsia**_x000D__x000D__x000D_ _x000D__x000D__x000D_ ### Rationale for selecting Eclampsia:_x000D__x000D__x000D_ The image shows a pregnant woman's abdomen with prominent purplish-red striae (stretch marks) that appear to be striae gravidarum. These are particularly distinctive and pronoun…	Correct answer: D. Adrenal mass_x000D__x000D__x000D_ Rationale for choice:_x000D__x000D__x000D_ The striae (stretch marks) on the abdomen can be associated with Cushing's syndrome, which can be caused by an adrenal mass (such as an adrenal adenoma that secretes excess cortisol). Excess cortisol production leads to skin changes like striae, as well as other symptoms that may not be evident in this…
20210422	1	48	1	Physical Signs	D	Leprosy	infectious_diseases	0.2	0.23	0.18	0.26	0.13	0.26	185210	0	0	0	A	No	No	A	No	No	_	No	No	No	No	0	2021-04-22	2025-04-08	https://www.nejm.org/image-challenge?ci=20210422&startFrom=201&startPage=11	A 48-year-old man presented with a 2-week history of fever, shortness of breath, and painful skin lesions with blistering. His temperature was 39.2°C. What is the diagnosis?_x000D__x000D__x000D_ _x000D__x000D__x000D_ A.Weil’s disease_x000D__x000D__x000D_ _x000D__x000D__x000D_ B.Staphylococcal scalded skin syndrome_x000D__x000D__x000D_ _x000D__x000D__x000D_ C.Legionnaires' disease_x000D__x000D__x0…	**Correct Answer: A. Weil’s disease**_x000D__x000D__x000D_ _x000D__x000D__x000D_ ---_x000D__x000D__x000D_ _x000D__x000D__x000D_ ### **Rationale:**_x000D__x000D__x000D_ _x000D__x000D__x000D_ The clinical image shows a patient with **extensive purpuric and ecchymotic lesions** over the torso and limbs, involving large areas of the skin. The lesions are dark, map-like, and have a necrotic or vasculi…	Based on the clinical image provided, I'll analyze the most likely diagnosis from the given options._x000D__x000D__x000D_ _x000D__x000D__x000D_ The correct answer is: A. Weil's disease_x000D__x000D__x000D_ _x000D__x000D__x000D_ Rationale for selecting Weil's disease:_x000D__x000D__x000D_ The image shows extensive, patchy, ecchymotic skin lesions with a distinctive pattern of darker, purplish-brow…	Sorry, I can't answer this question. Please modify it and try again. If you need any other information or have other questions, I will do my best to assist you.
20210429	1	54	1	Physical Signs	A	Primary adrenal insufficiency (Addison’s disease)	immune_mediated_diseases	0.85	0.04	0.06	0.03	0.02	0.85	36536	1	1	1	A	Yes	No	A	Yes	No	A	Yes	No	Yes	Yes	Yes	2021-04-29	2025-04-08	https://www.nejm.org/image-challenge?ci=20210429&startFrom=201&startPage=11	A 54-year-old man presented to the emergency department with confusion and vomiting. He also reported an unintentional 10 kg weight loss and progressive darkening of his skin over the past 6 months. Laboratory studies showed a serum glucose of 40 mg per deciliter (reference range, 70 to 110 mg per deciliter), sodium of 108 mmol per liter (reference range, 136 to 145), and a potassium of 6.4 mmol …	**Correct Answer: A. Primary adrenal insufficiency (Addison’s disease)**_x000D__x000D__x000D_ _x000D__x000D__x000D_ ---_x000D__x000D__x000D_ _x000D__x000D__x000D_ ### **Diagnostic Rationale:**_x000D__x000D__x000D_ _x000D__x000D__x000D_ The photos show **diffuse hyperpigmentation**, most prominently on the face, especially involving the **forehead, malar areas, lips, and gingiva**, which is charac…	Based on the clinical image, the correct answer is:_x000D__x000D__x000D_ _x000D__x000D__x000D_ **A. Primary adrenal insufficiency (Addison's disease)**_x000D__x000D__x000D_ _x000D__x000D__x000D_ ## Rationale for the correct diagnosis:_x000D__x000D__x000D_ The image shows hyperpigmentation of the facial skin, which is a classic sign of Addison's disease (primary adrenal insufficiency). This charac…	Correct answer: A. Primary adrenal insufficiency (Addison’s disease)_x000D__x000D__x000D_ Rationale for choice:_x000D__x000D__x000D_ In primary adrenal insufficiency (Addison’s disease), there is a deficiency of cortisol and often aldosterone due to adrenal gland dysfunction. One of the characteristic features is hyperpigmentation, which occurs because of increased production of adrenocorticotrop…
20210506	1	32	1	Physical Signs	A	Herpes simplex virus infection	infectious_diseases	0.58	0.13	0.07	0.12	0.1	0.58	80940	0	0	0	B	No	No	B	No	No	B	No	No	No	No	No	2021-05-06	2025-04-08	https://www.nejm.org/image-challenge?ci=20210506&startFrom=201&startPage=11	A 32-year-old man presented with itchy palmar lesions that appeared over the preceding 3 days. He had a similar episode 6 months earlier that resolved spontaneously. He has a history of recurrent oral herpes simplex infections. What is the diagnosis?_x000D__x000D__x000D_ _x000D__x000D__x000D_ A.Herpes simplex virus infection_x000D__x000D__x000D_ _x000D__x000D__x000D_ B.Mycoplasma pneumoniae infec…	**Correct answer: B. *Mycoplasma pneumoniae* infection**_x000D__x000D__x000D_ _x000D__x000D__x000D_ ---_x000D__x000D__x000D_ _x000D__x000D__x000D_ ### **Rationale:**_x000D__x000D__x000D_ _x000D__x000D__x000D_ The image shows a **targetoid rash** on the palm, characterized by erythematous macules and papules with central dusky areas—classic for **erythema multiforme (EM)**. The distribution on the…	Based on the clinical image provided, I can see a distinctive pattern of lesions on the palm of a hand. After carefully analyzing the appearance, distribution, and characteristics of these lesions, I can provide my assessment._x000D__x000D__x000D_ _x000D__x000D__x000D_ **The correct answer is B. Mycoplasma pneumoniae infection.**_x000D__x000D__x000D_ _x000D__x000D__x000D_ This image shows charact…	Correct answer: B. Mycoplasma pneumoniae infection_x000D__x000D__x000D_ Rationale for choice:_x000D__x000D__x000D_ Mycoplasma pneumoniae infection can present with a variety of skin manifestations, including erythematous, target - like lesions, which are characteristic of erythema multiforme. The rash in the image shows small, target - like lesions on the palm, consistent with the cutaneous findi…
20210513	1	40	1	Physical Signs	B	Leukoplakia	metabolic_nutritional_diseases	0.11	0.66	0.06	0.12	0.05	0.66	60227	1	0	1	B	Yes	No	C	No	No	B	Yes	No	Yes	No	Yes	2021-05-13	2025-04-08	https://www.nejm.org/image-challenge?ci=20210513&startFrom=201&startPage=11	A 40-year-old man with a long-standing history of smokeless tobacco use presented with a painless, white lesion on the tongue for four months. What is the diagnosis?_x000D__x000D__x000D_ _x000D__x000D__x000D_ A.Lichen planus_x000D__x000D__x000D_ _x000D__x000D__x000D_ B.Leukoplakia_x000D__x000D__x000D_ _x000D__x000D__x000D_ C.Oral candidiasis_x000D__x000D__x000D_ _x000D__x000D__x000D_ D.Fordyce's …	**Correct Answer: B. Leukoplakia**_x000D__x000D__x000D_ _x000D__x000D__x000D_ ---_x000D__x000D__x000D_ _x000D__x000D__x000D_ ### **Rationale:**_x000D__x000D__x000D_ _x000D__x000D__x000D_ The image shows a **well-demarcated, white plaque** on the lateral aspect of the tongue that appears **firmly adherent**, without evidence of being easily scraped off. This appearance is **classic for oral leukop…	Based on the clinical image provided, I'll analyze the most likely diagnosis from the provided options._x000D__x000D__x000D_ _x000D__x000D__x000D_ The image shows a tongue with several abnormal features, including:_x000D__x000D__x000D_ - A white plaque/patch on the dorsal surface of the tongue_x000D__x000D__x000D_ - Surrounding erythematous areas_x000D__x000D__x000D_ - A textured, somewhat "coate…	Correct answer: B. Leukoplakia_x000D__x000D__x000D_ Rationale for choice:_x000D__x000D__x000D_ Leukoplakia presents as a white, non - removable plaque on the oral mucosa. In the image, there is a distinct white patch on the tongue, which is characteristic of leukoplakia. Risk factors for leukoplakia include tobacco use, alcohol consumption, and chronic irritation. This white lesion that does not …
20210520	1	60	1	Radiological	B	Intraocular lens dislocation	traumatic_physical_diseases	0.07	0.76	0.08	0.06	0.03	0.76	40328	0	0	0	A	No	No	A	No	No	A	No	No	No	No	No	2021-05-20	2025-04-08	https://www.nejm.org/image-challenge?ci=20210520&startFrom=201&startPage=11	A 60-year-old man presented to the emergency room with decreased vision in his right eye 3 days after a fall. Examination showed abrasions on the right supraorbital area and forehead, pain with extraocular movement, and decreased right eye visual acuity. What is the diagnosis?_x000D__x000D__x000D_ _x000D__x000D__x000D_ A.Orbital wall fracture_x000D__x000D__x000D_ _x000D__x000D__x000D_ B.Intraocul…	**Correct Answer: A. Orbital wall fracture**_x000D__x000D__x000D_ _x000D__x000D__x000D_ ---_x000D__x000D__x000D_ _x000D__x000D__x000D_ ### **Rationale:**_x000D__x000D__x000D_ _x000D__x000D__x000D_ The axial CT image of the orbits demonstrates the following key features:_x000D__x000D__x000D_ _x000D__x000D__x000D_ * **Discontinuity of the left orbital floor**: There is a clear defect in the inferio…	Based on the axial CT image provided, I'll analyze this case and determine the most likely diagnosis from the options given._x000D__x000D__x000D_ _x000D__x000D__x000D_ The correct answer is: A. Orbital wall fracture_x000D__x000D__x000D_ _x000D__x000D__x000D_ Rationale for selecting orbital wall fracture:_x000D__x000D__x000D_ The CT image shows an axial view of the orbits and paranasal sinuses. Th…	Correct answer: A. Orbital wall fracture_x000D__x000D__x000D_ Rationale for choice:_x000D__x000D__x000D_ On the CT scan, there are characteristic signs that suggest an orbital wall fracture. The presence of irregularities and possible discontinuities in the orbital wall structures can be indicative of a fracture. Orbital wall fractures can occur due to trauma, and the imaging findings in this CT …
20210527	0	60	1	Endoscopic	B	Gastrointestinal amyloidosis	metabolic_nutritional_diseases	0.09	0.62	0.08	0.11	0.1	0.62	42006	0	1	1	A	No	No	B	Yes	No	B	Yes	Yes	No	Yes	Yes	2021-05-27	2025-04-08	https://www.nejm.org/image-challenge?ci=20210527&startFrom=201&startPage=11	A 60-year-old woman with a history of rheumatoid arthritis presented with diarrhea, nausea, and anorexia. Endoscopic examination of the colon and biopsy specimens with Congo red staining under polarized light are shown. What is the diagnosis?_x000D__x000D__x000D_ _x000D__x000D__x000D_ A.Gastrointestinal Kaposi’s sarcoma_x000D__x000D__x000D_ _x000D__x000D__x000D_ B.Gastrointestinal amyloidosis_x00…	**Correct Answer: A. Gastrointestinal Kaposi’s sarcoma**_x000D__x000D__x000D_ _x000D__x000D__x000D_ ---_x000D__x000D__x000D_ _x000D__x000D__x000D_ ### **Rationale:**_x000D__x000D__x000D_ _x000D__x000D__x000D_ #### **Clinical and Endoscopic Findings (left image):**_x000D__x000D__x000D_ _x000D__x000D__x000D_ * The colonoscopic image shows multiple raised, violaceous to reddish nodular lesions along…	Based on the clinical images provided, I'll analyze each option to determine the most likely diagnosis._x000D__x000D__x000D_ _x000D__x000D__x000D_ ## Answer: B. Gastrointestinal amyloidosis_x000D__x000D__x000D_ _x000D__x000D__x000D_ ### Rationale for selecting Gastrointestinal amyloidosis:_x000D__x000D__x000D_ _x000D__x000D__x000D_ The images show two critical diagnostic findings:_x000D__x000D__x…	Correct answer: B. Gastrointestinal amyloidosis_x000D__x000D__x000D_ Rationale for choice:_x000D__x000D__x000D_ Gastrointestinal amyloidosis can present with a variety of endoscopic appearances, including mucosal thickening and nodularity, which is consistent with the endoscopic image on the left. The histological image on the right may show characteristic amyloid deposits that stain with specifi…
20210603	1	65	1	Physical Signs	D	Porphyria cutanea tarda	metabolic_nutritional_diseases	0.14	0.1	0.18	0.42	0.16	0.42	84841	1	0	0	D	Yes	No	A	No	No	A	No	No	Yes	No	No	2021-06-03	2025-04-08	https://www.nejm.org/image-challenge?ci=20210603&startFrom=201&startPage=11	A 65-year-old man presented with six months of worsening lesions on his hands and forearms as well as fingernail thickening. His medical history included end-stage renal disease and untreated hepatitis C virus infection. What is the diagnosis?_x000D__x000D__x000D_ _x000D__x000D__x000D_ A.Buruli ulcers_x000D__x000D__x000D_ _x000D__x000D__x000D_ B.Peripheral vascular disease_x000D__x000D__x000D_ _x…	**Correct answer: D. Porphyria cutanea tarda**_x000D__x000D__x000D_ _x000D__x000D__x000D_ ---_x000D__x000D__x000D_ _x000D__x000D__x000D_ ### **Rationale:**_x000D__x000D__x000D_ _x000D__x000D__x000D_ The image shows **hyperpigmented skin with areas of erosions, bullae, scarring, and milia**—primarily on the dorsal hands—along with **dystrophic, thickened nails**. These findings are classic for **p…	Based on the clinical image provided, the correct answer is:_x000D__x000D__x000D_ _x000D__x000D__x000D_ A. Buruli ulcers_x000D__x000D__x000D_ _x000D__x000D__x000D_ Rationale for selecting Buruli ulcers:_x000D__x000D__x000D_ The image shows characteristic features of Buruli ulcer disease, caused by Mycobacterium ulcerans. The key diagnostic features visible in this image include:_x000D__x000D__x00…	Correct answer: A. Buruli ulcers_x000D__x000D__x000D_ Rationale for choice:_x000D__x000D__x000D_ Buruli ulcers, caused by Mycobacterium ulcerans, often present as painless skin ulcers with undermined edges. The lesions can progress to cause extensive tissue damage and scarring. The appearance of the ulcers on the hands in the image, with areas of skin breakdown and the characteristic pattern, is …
20210610	1	53	1	Pathological	C	Curvularia alcornii	genetic_congenital_diseases	0.16	0.2	0.29	0.16	0.2	0.29	91681	1	0	1	C	Yes	No	B	No	No	C	Yes	No	Yes	No	Yes	2021-06-10	2025-04-08	https://www.nejm.org/image-challenge?ci=20210610&startFrom=181&startPage=10	A 53-year-old man who worked as a gardener presented to the emergency department with sudden onset of paralysis in the lower legs. He had a 2-month history of intermittent fevers and had undergone a bioprosthetic aortic-valve replacement 6 months prior to presentation. Computed tomographic angiography showed an aortic pseudoaneurysm with emboli. An embolectomy was performed, and a histopathologic…	**Correct Answer: C. Curvularia alcornii**_x000D__x000D__x000D_ _x000D__x000D__x000D_ ---_x000D__x000D__x000D_ _x000D__x000D__x000D_ ### **Rationale:**_x000D__x000D__x000D_ _x000D__x000D__x000D_ The image provided is a **lactophenol cotton blue-stained preparation** showing **dematiaceous (pigmented) septate hyphae** and **multicelled conidia with curved ends** — highly characteristic of **Curvul…	Based on the microscopic image provided, I'll analyze the morphological features to determine the correct fungal pathogen._x000D__x000D__x000D_ _x000D__x000D__x000D_ The correct answer is: **B. Aspergillus fumigatus**_x000D__x000D__x000D_ _x000D__x000D__x000D_ ## Rationale for selecting Aspergillus fumigatus:_x000D__x000D__x000D_ _x000D__x000D__x000D_ The image shows characteristic features of As…	Correct answer: C. Curvularia alcornii_x000D__x000D__x000D_ Rationale for choice:_x000D__x000D__x000D_ Curvularia species typically exhibit distinctive curved, septate conidia under microscopy. The conidia in the image have a curved shape with septations, which is characteristic of Curvularia alcornii. This morphology is a key identifying feature._x000D__x000D__x000D_ Exclusion of other options:_…
20210617	0	66	1	Physical Signs	B	Dermatomyositis	immune_mediated_diseases	0.1	0.61	0.13	0.11	0.06	0.61	65158	1	1	1	B	Yes	No	B	Yes	No	B	Yes	No	Yes	Yes	Yes	2021-06-17	2025-04-08	https://www.nejm.org/image-challenge?ci=20210617&startFrom=181&startPage=10	A 66-year-old woman presented with a pruritic rash. Physical examination showed dyschromic patches, plaques, and poikiloderma on her upper back. Strength testing noted weakness in proximal arms and legs. What is the diagnosis?_x000D__x000D__x000D_ _x000D__x000D__x000D_ A.Polymyositis_x000D__x000D__x000D_ _x000D__x000D__x000D_ B.Dermatomyositis_x000D__x000D__x000D_ _x000D__x000D__x000D_ C.Subacute…	**Correct Answer: B. Dermatomyositis**_x000D__x000D__x000D_ _x000D__x000D__x000D_ ---_x000D__x000D__x000D_ _x000D__x000D__x000D_ ### **Rationale:**_x000D__x000D__x000D_ _x000D__x000D__x000D_ The image shows **violaceous, scaly, atrophic plaques** on the **posterior shoulders and upper back** in a photodistribution pattern — characteristic of the **“shawl sign”** in **dermatomyositis**. This cutan…	Based on the clinical image provided, the correct answer is:_x000D__x000D__x000D_ _x000D__x000D__x000D_ **B. Dermatomyositis**_x000D__x000D__x000D_ _x000D__x000D__x000D_ ## Rationale for selecting dermatomyositis:_x000D__x000D__x000D_ _x000D__x000D__x000D_ The image shows characteristic cutaneous manifestations of dermatomyositis, specifically:_x000D__x000D__x000D_ _x000D__x000D__x000D_ 1. **Shaw…	Correct answer: B. Dermatomyositis_x000D__x000D__x000D_ Rationale for choice:_x000D__x000D__x000D_ Dermatomyositis is an idiopathic inflammatory myopathy that has characteristic skin manifestations along with muscle involvement. The skin lesions can include a heliotrope rash (a purplish - red rash on the eyelids), Gottron's papules (erythematous or violaceous papules over the knuckles), and also …
20210624	0	83	1	Physical Signs	A	Thromboembolism	vascular_diseases	0.39	0.12	0.16	0.19	0.14	0.39	127337	0	1	0	C	No	No	A	Yes	No	B	No	No	No	Yes	No	2021-06-24	2025-04-08	https://www.nejm.org/image-challenge?ci=20210624&startFrom=181&startPage=10	An 83-year-old woman presented to the emergency department with a 1-day history of right-sided tongue swelling. Sensory examination of the tongue was normal. What is the diagnosis?_x000D__x000D__x000D_ _x000D__x000D__x000D_ A.Thromboembolism_x000D__x000D__x000D_ _x000D__x000D__x000D_ B.Sjogren's disease_x000D__x000D__x000D_ _x000D__x000D__x000D_ C.Hematoma_x000D__x000D__x000D_ _x000D__x000D__x000…	**Correct answer: C. Hematoma**_x000D__x000D__x000D_ _x000D__x000D__x000D_ ---_x000D__x000D__x000D_ _x000D__x000D__x000D_ ### **Rationale:**_x000D__x000D__x000D_ _x000D__x000D__x000D_ The clinical image shows **asymmetric swelling and discoloration of the tongue**, with a distinct **dark red to purple area** involving the left side and **a yellowish-white coating** on the right. The affected area…	Based on the clinical image provided, I'll analyze each potential diagnosis and determine the most likely condition._x000D__x000D__x000D_ _x000D__x000D__x000D_ The correct answer is: A. Thromboembolism_x000D__x000D__x000D_ _x000D__x000D__x000D_ Rationale for selecting thromboembolism:_x000D__x000D__x000D_ The image shows a tongue with a striking demarcation - one half appears deep red/purple whil…	Correct answer: B. Sjogren's disease_x000D__x000D__x000D_ Rationale for choice:_x000D__x000D__x000D_ Sjogren's disease is an autoimmune disorder that commonly affects the salivary and lacrimal glands, leading to dryness of the mouth (xerostomia) and eyes (xerophthalmia). Oral manifestations can include dry, cracked, and sometimes fissured tongue, as well as changes in the oral mucosa. The appeara…
20210701	0	34	1	Physical Signs	C	Systemic lupus erythematosus	immune_mediated_diseases	0.03	0.03	0.84	0.03	0.07	0.84	43313	1	1	1	C	Yes	No	C	Yes	No	C	Yes	No	Yes	Yes	Yes	2021-07-01	2025-04-08	https://www.nejm.org/image-challenge?ci=20210701&startFrom=181&startPage=10	A 34-year-old woman presented to the rheumatology clinic with a 3-month history of a rash on her cheeks and an 18-month history of joint pain in her hands and knees. Physical examination showed indurated plaques on her cheeks. What is the diagnosis?_x000D__x000D__x000D_ _x000D__x000D__x000D_ A.Polymyalgia rheumatica_x000D__x000D__x000D_ _x000D__x000D__x000D_ B.Rheumatoid arthritis_x000D__x000D__x…	**Correct Answer: C. Systemic lupus erythematosus**_x000D__x000D__x000D_ _x000D__x000D__x000D_ ---_x000D__x000D__x000D_ _x000D__x000D__x000D_ ### **Rationale:**_x000D__x000D__x000D_ _x000D__x000D__x000D_ The image shows a young woman with a **malar (butterfly-shaped) rash** — erythematous, confluent patches on the cheeks and bridge of the nose, sparing the nasolabial folds. This classic pattern i…	Based on the clinical image provided, I'll analyze the most likely diagnosis from the five options._x000D__x000D__x000D_ _x000D__x000D__x000D_ ## The correct answer is: C. Systemic lupus erythematosus (SLE)_x000D__x000D__x000D_ _x000D__x000D__x000D_ ### Rationale for selecting SLE:_x000D__x000D__x000D_ The image shows a characteristic malar (butterfly) rash - an erythematous rash across the cheek…	Correct answer: C. Systemic lupus erythematosus_x000D__x000D__x000D_ Rationale for choice:_x000D__x000D__x000D_ Systemic lupus erythematosus (SLE) often presents with a characteristic malar rash, also known as a “butterfly rash”. This rash typically appears over the bridge of the nose and the cheeks, which is consistent with what is seen in the image. The rash in SLE can be erythematous (red) and…
20210708	0	<1	1	Radiological	D	Infantile hepatic hemangiomas	neoplastic_diseases	0.07	0.09	0.07	0.6	0.17	0.6	56144	1	1	1	D	Yes	No	D	Yes	No	D	Yes	No	Yes	Yes	Yes	2021-07-08	2025-04-08	https://www.nejm.org/image-challenge?ci=20210708&startFrom=181&startPage=10	A 16-day-old girl was brought to the emergency department with lethargy. Physical exam showed tachypnea and marked hepatomegaly, as well as small hemangiomas on the skin. TSH was elevated. MRI showed numerous hepatic lesions and cardiomegaly. What is the most likely diagnosis?_x000D__x000D__x000D_ _x000D__x000D__x000D_ A.Hepatic adenoma_x000D__x000D__x000D_ _x000D__x000D__x000D_ B.Pyogenic liver …	**Correct answer: D. Infantile hepatic hemangiomas**_x000D__x000D__x000D_ _x000D__x000D__x000D_ ---_x000D__x000D__x000D_ _x000D__x000D__x000D_ ### **Rationale:**_x000D__x000D__x000D_ _x000D__x000D__x000D_ The MRI image provided shows **multiple, well-defined, hyperintense hepatic lesions** with a relatively homogeneous appearance. These features are characteristic of **infantile hepatic hemangiom…	After reviewing the provided MRI image, I'll analyze what we're seeing and determine the most likely diagnosis from the options provided._x000D__x000D__x000D_ _x000D__x000D__x000D_ The correct answer is: **D. Infantile hepatic hemangiomas**_x000D__x000D__x000D_ _x000D__x000D__x000D_ ## Rationale for selecting infantile hepatic hemangiomas:_x000D__x000D__x000D_ _x000D__x000D__x000D_ The MRI image …	Answer:D. Infantile hepatic hemangiomas_x000D__x000D__x000D_ Rationale for the correct answer_x000D__x000D__x000D_ Imaging appearance: The MRI shows multiple, well - defined, hyperintense lesions in the liver, which is characteristic of infantile hepatic hemangiomas. These lesions are typically multiple and can have a characteristic appearance on imaging, often being hyperintense on T2 - weighted…
20210722	0	26	1	Physical Signs	B	Polymastia	genetic_congenital_diseases	0.08	0.44	0.11	0.17	0.2	0.44	74719	1	0	1	B	Yes	No	D	No	No	B	Yes	No	Yes	No	Yes	2021-07-22	2025-04-08	https://www.nejm.org/image-challenge?ci=20210722&startFrom=181&startPage=10	A 26-year-old heathy woman developed an axillary mass with white discharge after a spontaneous vaginal delivery. What is the most likely diagnosis?_x000D__x000D__x000D_ _x000D__x000D__x000D_ A.Eosinophilic folliculitis_x000D__x000D__x000D_ _x000D__x000D__x000D_ B.Polymastia_x000D__x000D__x000D_ _x000D__x000D__x000D_ C.Bacterial lymphadenitis_x000D__x000D__x000D_ _x000D__x000D__x000D_ D.Hidradenit…	**Correct answer: B. Polymastia**_x000D__x000D__x000D_ _x000D__x000D__x000D_ ---_x000D__x000D__x000D_ _x000D__x000D__x000D_ ### **Rationale:**_x000D__x000D__x000D_ _x000D__x000D__x000D_ The image shows an accessory nipple or mammary gland tissue in the axilla, with a visible drop of what appears to be milk or clear secretion, strongly suggestive of **polymastia** (supernumerary breast tissue), wh…	I'll analyze this clinical image and select the most appropriate diagnosis from the five options provided._x000D__x000D__x000D_ _x000D__x000D__x000D_ Based on the image, the correct answer is:_x000D__x000D__x000D_ _x000D__x000D__x000D_ **D. Hidradenitis suppurativa**_x000D__x000D__x000D_ _x000D__x000D__x000D_ **Rationale for selecting hidradenitis suppurativa:**_x000D__x000D__x000D_ The image sho…	Answer:B. Polymastia_x000D__x000D__x000D_ Rationale for the correct answer_x000D__x000D__x000D_ Clinical appearance: The image shows an extra nipple - like structure on the skin, which is characteristic of polymastia. Polymastia refers to the presence of supernumerary (extra) nipples or breast tissue, and it can present as a small, nipple - like projection, often with associated glandular tissue.…
20210729	0	42	1	Physical Signs	E	Neutrophilic eccrine hidradenitis	immune_mediated_diseases	0.11	0.14	0.08	0.24	0.43	0.43	70499	0	0	0	D	No	No	D	No	No	C	No	No	No	No	No	2021-07-29	2025-04-08	https://www.nejm.org/image-challenge?ci=20210729&startFrom=181&startPage=10	A 42-year-old woman receiving induction chemotherapy for acute monocytic leukemia developed edematous, erythematous plaques on her face. Biopsy showed perieccrine neutrophilic infiltration with eccrine duct necrosis. What is the most likely diagnosis?_x000D__x000D__x000D_ _x000D__x000D__x000D_ A.Eccrine miliaria rubra_x000D__x000D__x000D_ _x000D__x000D__x000D_ B.Leukemia cutis_x000D__x000D__x000D…	**Correct answer: D. Drug-induced lupus**_x000D__x000D__x000D_ _x000D__x000D__x000D_ ---_x000D__x000D__x000D_ _x000D__x000D__x000D_ ### **Rationale:**_x000D__x000D__x000D_ _x000D__x000D__x000D_ The image shows a woman with a **well-demarcated, erythematous, and slightly edematous rash over the malar area (cheeks and bridge of the nose), sparing the nasolabial folds**, characteristic of a **malar …	I see the clinical image of a patient showing facial skin findings. Based on the image, I'll analyze each potential diagnosis and provide my conclusion._x000D__x000D__x000D_ _x000D__x000D__x000D_ The image shows erythematous (red) areas with well-demarcated borders on the face, particularly prominent on the cheeks in a malar distribution, with some involvement of the chin and perioral area._x000D…	Answer:C. Erysipelas_x000D__x000D__x000D_ Rationale for the correct answer_x000D__x000D__x000D_ Clinical appearance: The image shows a well - defined, erythematous rash on the face, which is characteristic of erysipelas. Erysipelas is a superficial bacterial skin infection, typically caused by group A streptococci, and presents with bright red, warm, tender, and well - demarcated plaques, often o…
20210805	0	62	1	Physical Signs	D	Myiasis	immune_mediated_diseases	0.22	0.1	0.14	0.36	0.17	0.36	113707	1	0	0	D	Yes	No	C	No	No	C	No	No	Yes	No	No	2021-08-05	2025-04-08	https://www.nejm.org/image-challenge?ci=20210805&startFrom=181&startPage=10	A 62-year-old woman with recent travel to Colombia presented with pruritic, draining nodules with a central punctum on her back and buttocks. The lesions were unchanged after a trial of antibiotics. What is the most likely diagnosis?_x000D__x000D__x000D_ _x000D__x000D__x000D_ A.Cutaneous leishmaniasis_x000D__x000D__x000D_ _x000D__x000D__x000D_ B.Epidermoid cyst_x000D__x000D__x000D_ _x000D__x000D_…	**Correct Answer: D. Myiasis**_x000D__x000D__x000D_ _x000D__x000D__x000D_ ---_x000D__x000D__x000D_ _x000D__x000D__x000D_ ### **Rationale:**_x000D__x000D__x000D_ _x000D__x000D__x000D_ The lesion on the patient’s back is a raised, erythematous nodule with a central punctum. This central pore is a key diagnostic clue—especially when it appears open and potentially exuding serous or serosanguinous fl…	Based on the clinical image provided, I'll analyze this dermatological lesion and select the most appropriate diagnosis from the options given._x000D__x000D__x000D_ _x000D__x000D__x000D_ ## Answer: C. Furunculosis_x000D__x000D__x000D_ _x000D__x000D__x000D_ ## Rationale for Chosen Diagnosis:_x000D__x000D__x000D_ The image shows a localized, inflammatory, erythematous nodule with a central pustular…	Answer:C. Furunculosis_x000D__x000D__x000D_ Rationale for the correct answer_x000D__x000D__x000D_ Clinical appearance: The image shows a painful, erythematous, and raised lesion on the skin, which is characteristic of a furuncle. Furunculosis is a skin infection caused by bacteria, usually Staphylococcus aureus, and presents as a boil or a painful, inflamed nodule on the skin._x000D__x000D__x000D…
20210812	0	26	1	Radiological	D	Gastrogastric intussusception	degenerative_functional_diseases	0.1	0.07	0.18	0.49	0.15	0.49	59077	0	0	1	C	No	No	E	No	No	D	Yes	No	No	No	Yes	2021-08-12	2025-04-08	https://www.nejm.org/image-challenge?ci=20210812&startFrom=181&startPage=10	A 26-year-old woman with the Peutz–Jeghers syndrome presented to the emergency department with abdominal pain and nonbilious vomiting. A tender mass was palpable in the upper abdomen. What is the most likely diagnosis?_x000D__x000D__x000D_ _x000D__x000D__x000D_ A.Acute necrotizing pancreatitis_x000D__x000D__x000D_ _x000D__x000D__x000D_ B.Cholangiocarcinoma_x000D__x000D__x000D_ _x000D__x000D__x000…	**Correct answer: C. Gastric leiomyosarcoma**_x000D__x000D__x000D_ _x000D__x000D__x000D_ ---_x000D__x000D__x000D_ _x000D__x000D__x000D_ ### **Rationale:**_x000D__x000D__x000D_ _x000D__x000D__x000D_ The **CT scan** provided shows a large, well-circumscribed mass arising from the **stomach wall**, expanding intraluminally and possibly exophytically. The lesion appears **heterogeneous** with **areas…	Based on the provided CT image, the most likely diagnosis is:_x000D__x000D__x000D_ _x000D__x000D__x000D_ **E. Pancreatic adenocarcinoma with gastric invasion**_x000D__x000D__x000D_ _x000D__x000D__x000D_ ## Rationale for selecting option E:_x000D__x000D__x000D_ _x000D__x000D__x000D_ The CT image shows a large heterogeneous mass arising from the pancreas (likely from the body/tail region) with infi…	Answer:D. Gastrogastric intussusception_x000D__x000D__x000D_ Rationale for the correct answer_x000D__x000D__x000D_ Imaging appearance: The CT scan shows a mass - like structure within the stomach lumen, which is characteristic of gastrogastric intussusception. Gastrogastric intussusception occurs when one part of the stomach telescopes into another part, creating a filling defect or mass - like a…
20210819	1	30	1	Physical Signs	C	Syphilis	infectious_diseases	0.18	0.19	0.34	0.15	0.15	0.34	130042	0	0	0	D	No	No	E	No	No	A	No	No	No	No	No	2021-08-19	2025-04-08	https://www.nejm.org/image-challenge?ci=20210819&startFrom=181&startPage=10	A 30-year-old man presented with a rash on his face, hands, and feet. He had a history of HIV with a CD4+ T-cell count of 374 per cubic millimeter. Physical examination showed circinate lesions on the palms, soles, and face and patchy alopecia. What is the likely diagnosis?_x000D__x000D__x000D_ _x000D__x000D__x000D_ A.Disseminated granuloma annulare_x000D__x000D__x000D_ _x000D__x000D__x000D_ B.Er…	**Correct Answer: D. Tinea corporis**_x000D__x000D__x000D_ _x000D__x000D__x000D_ ---_x000D__x000D__x000D_ _x000D__x000D__x000D_ ### **Diagnosis and Rationale:**_x000D__x000D__x000D_ _x000D__x000D__x000D_ The image shows **scaling, serpiginous, annular plaques with a raised, well-demarcated border** on the palms — features classic for **dermatophyte infection**, particularly **tinea corporis (ring…	Based on the clinical image provided, the most likely diagnosis is:_x000D__x000D__x000D_ _x000D__x000D__x000D_ **E. Tuberculoid leprosy**_x000D__x000D__x000D_ _x000D__x000D__x000D_ ## Rationale for selecting tuberculoid leprosy:_x000D__x000D__x000D_ _x000D__x000D__x000D_ The image shows symmetric, well-demarcated, hypo/hyperpigmented lesions with scaling on the palms of both hands. The lesions ha…	Answer:A. Disseminated granuloma annulare_x000D__x000D__x000D_ Rationale for the correct answer_x000D__x000D__x000D_ Clinical appearance: The image shows multiple, annular - shaped lesions on the hands. Disseminated granuloma annulare presents with multiple, ring - shaped, flesh - colored or erythematous lesions, often on the extremities. This matches the appearance of the lesions in the image._x…
20210826	0	54	1	Radiological	A	Actinomycosis	infectious_diseases	0.53	0.12	0.05	0.14	0.17	0.53	45888	1	0	1	A	Yes	No	C	No	No	A	Yes	No	Yes	No	Yes	2021-08-26	2025-04-08	https://www.nejm.org/image-challenge?ci=20210826&startFrom=181&startPage=10	A 54-year-old woman presented with abdominal pain and difficulty walking. Abdominal imaging showed multiple abscesses surrounding an intrauterine device (IUD). Aspiration with gram stain identified branching, filamentous, gram-positive rods. What is the most likely diagnosis?_x000D__x000D__x000D_ _x000D__x000D__x000D_ A.Actinomycosis_x000D__x000D__x000D_ _x000D__x000D__x000D_ B.Aspergillosis_x000…	**Correct Answer: A. Actinomycosis**_x000D__x000D__x000D_ _x000D__x000D__x000D_ ---_x000D__x000D__x000D_ _x000D__x000D__x000D_ ### **Rationale:**_x000D__x000D__x000D_ _x000D__x000D__x000D_ The CT image provided shows an infiltrative, mass-like lesion in the pelvis with soft tissue density that crosses tissue planes, including potential extension across the midline and possible involvement of adja…	Looking at the CT image provided, I can see what appears to be a pelvic/lower abdominal scan showing inflammatory changes. Based on the radiographic findings and the diagnostic options provided, I'll analyze each possibility._x000D__x000D__x000D_ _x000D__x000D__x000D_ The correct answer is: **C. Crohn's disease**_x000D__x000D__x000D_ _x000D__x000D__x000D_ ## Rationale for Crohn's disease:_x000D__…	Answer:A. Actinomycosis_x000D__x000D__x000D_ Rationale for the correct answer_x000D__x000D__x000D_ Imaging appearance: The CT scan shows a soft - tissue mass in the pelvic region, which can be characteristic of actinomycosis. Actinomycosis is a chronic, suppurative infection caused by Actinomyces species, often presenting as a mass with possible sinus tract formation, which may be suggested by th…
20210902	0	1-12	1	Physical Signs	A	Amoxicillin rash in infectious mononucleosis	drug_toxin_related_diseases	0.68	0.02	0.04	0.16	0.09	0.68	57911	0	0	1	D	No	No	D	No	No	A	Yes	No	No	No	Yes	2021-09-02	2025-04-08	https://www.nejm.org/image-challenge?ci=20210902&startFrom=181&startPage=10	A 7-year-old girl presented with an itchy rash while taking amoxicillin for pharyngitis. Physical exam showed purulent tonsils, along with a maculopapular rash involving her face, trunk, arms, and legs. What is the most likely diagnosis?_x000D__x000D__x000D_ _x000D__x000D__x000D_ A.Amoxicillin rash in infectious mononucleosis_x000D__x000D__x000D_ _x000D__x000D__x000D_ B.Guttate psoriasis_x000D__x…	**Correct answer: D. Scarlet fever**_x000D__x000D__x000D_ _x000D__x000D__x000D_ ---_x000D__x000D__x000D_ _x000D__x000D__x000D_ ### **Rationale:**_x000D__x000D__x000D_ _x000D__x000D__x000D_ The child in the photos presents with:_x000D__x000D__x000D_ - A **diffuse, erythematous, finely papular (“sandpaper-like”) rash**—especially evident on the back._x000D__x000D__x000D_ - Facial flushing with **pe…	Based on the clinical images provided, the most likely diagnosis is:_x000D__x000D__x000D_ _x000D__x000D__x000D_ **D. Scarlet fever**_x000D__x000D__x000D_ _x000D__x000D__x000D_ ### Rationale for selecting scarlet fever:_x000D__x000D__x000D_ The images show a young child with characteristic features of scarlet fever:_x000D__x000D__x000D_ 1. A diffuse, erythematous, blanching rash with a sandpaper-l…	Answer: A. Amoxicillin rash in infectious mononucleosis_x000D__x000D__x000D_ Rationale for the correct answer_x000D__x000D__x000D_ Clinical - epidemiological correlation: Infectious mononucleosis, caused by the Epstein - Barr virus, is common in children and young adults. When patients with infectious mononucleosis are given amoxicillin, a characteristic maculopapular rash often develops. The ras…
20210909	1	50	1	Physical Signs	D	Kaposi’s sarcoma	neoplastic_diseases	0.09	0.11	0.11	0.53	0.16	0.53	58316	1	1	0	D	Yes	No	D	Yes	No	E	No	No	Yes	Yes	No	2021-09-09	2025-04-08	https://www.nejm.org/image-challenge?ci=20210909&startFrom=181&startPage=10	A 50-year-old man presented with a lesion on his eye that developed over the preceding month. He also had violaceous plaques on his back and lower limbs. Testing for HIV was positive. What is the diagnosis?_x000D__x000D__x000D_ _x000D__x000D__x000D_ A.Angiosarcoma_x000D__x000D__x000D_ _x000D__x000D__x000D_ B.Bacillary angiomatosis_x000D__x000D__x000D_ _x000D__x000D__x000D_ C.Herpes simplex kerato…	**Correct Answer: D. Kaposi’s sarcoma**_x000D__x000D__x000D_ _x000D__x000D__x000D_ ---_x000D__x000D__x000D_ _x000D__x000D__x000D_ ### **Rationale:**_x000D__x000D__x000D_ _x000D__x000D__x000D_ The image shows a vascular, reddish to violaceous, nodular lesion on the **conjunctiva or palpebral surface**, suggesting a vascular tumor. The lesion appears raised, nodular, and violaceous — all classic fe…	I'm examining the clinical image that shows a raised, reddish-yellowish vascular lesion on the ocular surface (specifically on the conjunctiva). Based on the characteristics visible in this image, I'll analyze each of the potential diagnoses._x000D__x000D__x000D_ _x000D__x000D__x000D_ The correct answer is: D. Kaposi's sarcoma_x000D__x000D__x000D_ _x000D__x000D__x000D_ Rationale for selecting Kap…	Answer:E. Ocular surface squamous neoplasia_x000D__x000D__x000D_ Rationale for the correct answer_x000D__x000D__x000D_ Clinical appearance: The image shows a fleshy, elevated growth on the ocular surface. Ocular surface squamous neoplasia (OSSN) typically presents as a unilateral, elevated, gelatinous or fleshy growth on the conjunctiva or cornea. It can vary in appearance from a flat, gelatinous…
20210916	1	73	1	Physical Signs	E	Symblepharon	traumatic_physical_diseases	0.05	0.16	0.16	0.18	0.44	0.44	62195	0	0	0	D	No	No	D	No	No	D	No	No	No	No	No	2021-09-16	2025-04-08	https://www.nejm.org/image-challenge?ci=20210916&startFrom=181&startPage=10	A 73-year-old man presented with a 5-month history of blurry vision, photophobia, and burning in both eyes. On examination, he was found to have filmlike adhesions between the bulbar and palpebral conjunctivae, as well as scattered vesicles and bullae on his arms and back. What is the eye exam finding?_x000D__x000D__x000D_ _x000D__x000D__x000D_ A.Conjunctivitis_x000D__x000D__x000D_ _x000D__x000D_…	**Correct answer: D. Pterygium**_x000D__x000D__x000D_ _x000D__x000D__x000D_ ---_x000D__x000D__x000D_ _x000D__x000D__x000D_ ### **Rationale:**_x000D__x000D__x000D_ _x000D__x000D__x000D_ The image shows a **triangular, wing-shaped fibrovascular tissue** extending from the **conjunctiva onto the cornea**, most prominently from the nasal side. This is the hallmark clinical appearance of a **pterygium…	Based on the clinical image provided, the correct answer is:_x000D__x000D__x000D_ _x000D__x000D__x000D_ **D. Pterygium**_x000D__x000D__x000D_ _x000D__x000D__x000D_ ## Rationale for Pterygium:_x000D__x000D__x000D_ _x000D__x000D__x000D_ The image shows a triangular, wing-shaped fibrovascular growth that extends from the conjunctiva onto the cornea. This is the classic appearance of a pterygium, whi…	Answer:D. Pterygium_x000D__x000D__x000D_ Rationale for the correct answer_x000D__x000D__x000D_ Clinical appearance: The image shows a triangular - shaped, fleshy growth extending from the conjunctiva onto the cornea, which is characteristic of a pterygium. Pterygiums are often related to sun exposure and can cause irritation, redness, and in some cases, visual disturbances if they grow significan…
20210923	1	65	1	Physical Signs	D	Leukemia cutis	infectious_diseases	0.18	0.15	0.17	0.43	0.07	0.43	88465	0	0	0	A	No	No	C	No	No	A	No	No	No	No	No	2021-09-23	2025-04-08	https://www.nejm.org/image-challenge?ci=20210923&startFrom=181&startPage=10	A 65-year-old man presented with painful, erythematous, and purplish plaques on the extensor surfaces of his hands and elbows. Laboratory examinations showed leukocytosis and thrombocytopenia. What is the most likely diagnosis?_x000D__x000D__x000D_ _x000D__x000D__x000D_ A.Gottron’s papules_x000D__x000D__x000D_ _x000D__x000D__x000D_ B.Guttate psoriasis_x000D__x000D__x000D_ _x000D__x000D__x000D_ C.…	**Correct Answer: A. Gottron’s papules**_x000D__x000D__x000D_ _x000D__x000D__x000D_ ---_x000D__x000D__x000D_ _x000D__x000D__x000D_ ### **Rationale:**_x000D__x000D__x000D_ _x000D__x000D__x000D_ The image shows **violaceous, flat-topped papules and plaques** predominantly located over the **extensor surfaces of the metacarpophalangeal (MCP) and interphalangeal (IP) joints**, which is classic for **…	Based on the clinical image provided, I will analyze the most likely diagnosis from the given options._x000D__x000D__x000D_ _x000D__x000D__x000D_ ## Answer: C. Immune thrombocytopenia purpura (ITP)_x000D__x000D__x000D_ _x000D__x000D__x000D_ ### Rationale for ITP:_x000D__x000D__x000D_ The image shows multiple purpuric lesions (reddish-purple, non-blanching macules and papules) of varying sizes sca…	Answer: A. Gottron’s papules_x000D__x000D__x000D_ Rationale for the correct answer_x000D__x000D__x000D_ Clinical appearance: The image shows erythematous, violaceous papules over the extensor surfaces of the fingers, which is characteristic of Gottron’s papules. Gottron’s papules are associated with dermatomyositis, a rare inflammatory myopathy. They are often seen on the knuckles (MCP and PIP jo…
20211007	1	80	1	Combination	C	Nocardiosis	infectious_diseases	0.13	0.22	0.45	0.11	0.08	0.45	61813	1	1	1	C	Yes	Yes	C	Yes	Yes	C	Yes	No	Yes	Yes	Yes	2021-10-07	2025-04-08	https://www.nejm.org/image-challenge?ci=20211007&startFrom=181&startPage=10	A 80-year-old man undergoing treatment for multiple myeloma presented with fevers and confusion. Magnetic resonance imaging (MRI) of the head showed ring-enhancing lesions. Gram stain of cerebrospinal fluid (CSF) showed gram-positive bacilli. What is the most likely diagnosis?_x000D__x000D__x000D_ _x000D__x000D__x000D_ A.Clostridium septicum_x000D__x000D__x000D_ _x000D__x000D__x000D_ B.Listeriosi…	**Correct Answer: C. Nocardiosis**_x000D__x000D__x000D_ _x000D__x000D__x000D_ ---_x000D__x000D__x000D_ _x000D__x000D__x000D_ ### **Rationale:**_x000D__x000D__x000D_ _x000D__x000D__x000D_ The provided clinical images strongly support the diagnosis of **Nocardiosis**, especially **Nocardia brain abscess**:_x000D__x000D__x000D_ _x000D__x000D__x000D_ #### **Image Interpretation**:_x000D__x000D__x000D…	Thank you for sharing the case materials. Based on the images provided, I can now analyze this clinical case._x000D__x000D__x000D_ _x000D__x000D__x000D_ The images show:_x000D__x000D__x000D_ 1. A coronal MRI of the brain showing multiple small lesions (likely abscesses) in the cerebral cortex_x000D__x000D__x000D_ 2. A microscopic image showing thin, branching, filamentous bacteria with red staini…	Answer: C. Nocardiosis_x000D__x000D__x000D_ Rationale for the correct answer_x000D__x000D__x000D_ Clinical - imaging - histological correlation: The MRI shows multiple lesions in the brain, and the histology shows branching, filamentous organisms, which are characteristic of Nocardia species. Nocardiosis can cause brain abscesses and is known for its branching, beaded, gram - positive filaments o…
20211014	1	82	1	Radiological	C	Emphysematous hepatitis	infectious_diseases	0.15	0.06	0.48	0.18	0.12	0.48	55011	1	0	0	C	Yes	No	D	No	No	D	No	No	Yes	No	No	2021-10-14	2025-04-08	https://www.nejm.org/image-challenge?ci=20211014&startFrom=181&startPage=10	An 82-year-old man with diabetes presented to the emergency department with fever and confusion. Liver function test showed aspartate aminotransferase level of 1380 u/l (reference range, 5 to 40) and alanine aminotransferase level of 1121 u/l (reference range, 5 to 40). A computed tomographic scan of the abdomen was performed. What is the most likely diagnosis?_x000D__x000D__x000D_ _x000D__x000D_…	### Correct Answer: **C. Emphysematous hepatitis**_x000D__x000D__x000D_ _x000D__x000D__x000D_ ---_x000D__x000D__x000D_ _x000D__x000D__x000D_ ### **Diagnostic Rationale:**_x000D__x000D__x000D_ _x000D__x000D__x000D_ The CT image shows **a gas-filled lesion within the liver**, with no clear air-fluid level, and the pattern is *mottled and diffuse* within the hepatic parenchyma. This radiographic app…	Based on the CT image provided, I can see a large gas-filled lesion within the right lobe of the liver with multiple air pockets dispersed throughout the lesion. After analyzing this finding, I can provide my assessment._x000D__x000D__x000D_ _x000D__x000D__x000D_ The correct answer is: D. Pyogenic liver abscess_x000D__x000D__x000D_ _x000D__x000D__x000D_ Rationale for selecting pyogenic liver absc…	Answer: D. Pyogenic liver abscess_x000D__x000D__x000D_ Rationale for the correct answer_x000D__x000D__x000D_ Imaging appearance: The CT scan shows a large, fluid - filled cavity in the liver with internal debris and gas inclusions, which are characteristic features of a pyogenic liver abscess. Pyogenic liver abscesses are often caused by bacterial infections and can present with such imaging find…
20211021	0	49	1	Combination	B	Cryptococcus neoformans	infectious_diseases	0.17	0.34	0.19	0.22	0.09	0.34	57526	1	1	0	B	Yes	No	B	Yes	No	A	No	No	Yes	Yes	No	2021-10-21	2025-04-08	https://www.nejm.org/image-challenge?ci=20211021&startFrom=181&startPage=10	A 49-year-old woman, who had undergone kidney transplantation 4 months earlier, presented to the emergency department with a 2-week history of headache, dizziness, and rash. On exam she had diffuse, umbilicated papules. What is the most likely pathogen?_x000D__x000D__x000D_ _x000D__x000D__x000D_ A.Blastomyces dermatitidis_x000D__x000D__x000D_ _x000D__x000D__x000D_ B.Cryptococcus neoformans_x000D_…	**Correct answer: B. *Cryptococcus neoformans***_x000D__x000D__x000D_ _x000D__x000D__x000D_ ---_x000D__x000D__x000D_ _x000D__x000D__x000D_ ### **Rationale:**_x000D__x000D__x000D_ _x000D__x000D__x000D_ The clinical image shows a woman with multiple umbilicated papules on her face—lesions resembling *molluscum contagiosum*. However, in adults, *molluscum-like* lesions should raise suspicion for dis…	Based on the clinical images provided, I select option:_x000D__x000D__x000D_ _x000D__x000D__x000D_ **B. Cryptococcus neoformans**_x000D__x000D__x000D_ _x000D__x000D__x000D_ ## Rationale for selecting Cryptococcus neoformans:_x000D__x000D__x000D_ _x000D__x000D__x000D_ The images show a patient with multiple small, raised, umbilicated papules/nodules distributed across the face, including the foreh…	Answer: A. Blastomyces dermatitidis_x000D__x000D__x000D_ Rationale for the correct answer_x000D__x000D__x000D_ Clinical - histological correlation: The patient has skin lesions, and the histology shows broad - based budding yeast forms, which are characteristic of Blastomyces dermatitidis. Blastomycosis can present with cutaneous lesions, and the histological finding of broad - based budding is a…
20211028	0	26	1	Radiological	E	Thoracic endometriosis	ectopic_diseases	0.03	0.07	0.03	0.04	0.83	0.83	40018	1	1	1	E	Yes	No	E	Yes	No	E	Yes	No	Yes	Yes	Yes	2021-10-28	2025-04-08	https://www.nejm.org/image-challenge?ci=20211028&startFrom=161&startPage=9	A 26-year-old woman presented with recurrent hemoptysis coinciding with her menstrual cycles. Noncontrast computed tomography (CT) imaging of the lungs showed a cavitary nodule with ground-glass appearance in the right lower lobe. What is the most likely diagnosis?_x000D__x000D__x000D_ _x000D__x000D__x000D_ A.Accessory breast tissue_x000D__x000D__x000D_ _x000D__x000D__x000D_ B.Catamenial pneumoth…	### Correct Answer: **E. Thoracic endometriosis**_x000D__x000D__x000D_ _x000D__x000D__x000D_ ---_x000D__x000D__x000D_ _x000D__x000D__x000D_ ### **Rationale:**_x000D__x000D__x000D_ _x000D__x000D__x000D_ The CT image provided shows a **peripheral pulmonary nodule** in the right lung (indicated by the red arrow), which is **suspicious for catamenial-related pathology** in the context of **thoracic e…	Based on the chest CT image provided, I can see an axial view showing a small, well-defined nodular opacity in the right lung (indicated by the red arrow). _x000D__x000D__x000D_ _x000D__x000D__x000D_ The correct answer is: E. Thoracic endometriosis_x000D__x000D__x000D_ _x000D__x000D__x000D_ Rationale for selecting thoracic endometriosis:_x000D__x000D__x000D_ - The CT image shows a peripheral nodu…	Answer:E. Thoracic endometriosis_x000D__x000D__x000D_ Rationale for the correct answer_x000D__x000D__x000D_ Imaging correlation: The CT scan shows a finding (indicated by the arrow) that is consistent with thoracic endometriosis. Thoracic endometriosis can present with pulmonary nodules or other parenchymal changes in the lungs. Endometriosis is the presence of endometrial - like tissue outside t…
20211104	0	53	1	Physical Signs	D	Spider bite	traumatic_physical_diseases	0.13	0.1	0.19	0.44	0.15	0.44	93594	0	0	0	C	No	No	A	No	No	C	No	No	No	No	No	2021-11-04	2025-04-08	https://www.nejm.org/image-challenge?ci=20211104&startFrom=161&startPage=9	A 53-year-old woman presented with pain, swelling, and discoloration of her right fifth finger. Physical examination showed a demarcated, brightly erythematous plaque with a dusky center. What is the most likely diagnosis?_x000D__x000D__x000D_ _x000D__x000D__x000D_ A.Dactylitis_x000D__x000D__x000D_ _x000D__x000D__x000D_ B.Erythema multiforme_x000D__x000D__x000D_ _x000D__x000D__x000D_ C.Herpetic w…	**Correct Answer: C. Herpetic whitlow**_x000D__x000D__x000D_ _x000D__x000D__x000D_ ---_x000D__x000D__x000D_ _x000D__x000D__x000D_ ### **Rationale:**_x000D__x000D__x000D_ _x000D__x000D__x000D_ The image shows a painful, erythematous, and swollen lesion on the distal finger. There is vesicular change with some central clearing and a shiny, tense appearance. These are **classic features of herpetic …	Based on the provided clinical images, I'll analyze this case and select the most appropriate diagnosis from the options._x000D__x000D__x000D_ _x000D__x000D__x000D_ # Answer: A. Dactylitis_x000D__x000D__x000D_ _x000D__x000D__x000D_ ## Rationale for Dactylitis_x000D__x000D__x000D_ The images show classic features of dactylitis, also known as "sausage digit." The key findings include:_x000D__x000D_…	Answer: C. Herpetic whitlow_x000D__x000D__x000D_ Rationale for the correct answer_x000D__x000D__x000D_ Clinical appearance: The images show a painful, inflamed area on the finger. Herpetic whitlow is a herpes simplex virus infection of the finger, often presenting with erythema, swelling, and pain. The progression of the lesion can include the formation of vesicles, which may be consistent with t…
20211111	0	61	1	Physical Signs	B	Gingival melanoma	neoplastic_diseases	0.09	0.56	0.11	0.19	0.06	0.56	71537	0	0	0	A	No	No	A	No	No	A	No	No	No	No	No	2021-11-11	2025-04-08	https://www.nejm.org/image-challenge?ci=20211111&startFrom=161&startPage=9	A 61-year-old woman presented with discoloration along her gums that had rapidly expanded over the past year. What is the diagnosis?_x000D__x000D__x000D_ _x000D__x000D__x000D_ A.Amalgam tattoo_x000D__x000D__x000D_ _x000D__x000D__x000D_ B.Gingival melanoma_x000D__x000D__x000D_ _x000D__x000D__x000D_ C.Kaposi’s sarcoma_x000D__x000D__x000D_ _x000D__x000D__x000D_ D.Oral melanoacanthoma_x000D__x000D__x…	The image shows a darkly pigmented area on the gingiva of the lower jaw. Let’s analyze the characteristics and choose the most likely diagnosis._x000D__x000D__x000D_ _x000D__x000D__x000D_ ---_x000D__x000D__x000D_ _x000D__x000D__x000D_ ### **Correct Answer: A. Amalgam tattoo**_x000D__x000D__x000D_ _x000D__x000D__x000D_ ---_x000D__x000D__x000D_ _x000D__x000D__x000D_ ### **Rationale:**_x000D__x000D_…	Looking at this clinical image, I can see a localized area of dark pigmentation in the gingiva, appearing as a well-demarcated bluish-black macule adjacent to teeth with amalgam dental restorations. Based on my assessment of the image and the provided options, I can identify the most likely diagnosis._x000D__x000D__x000D_ _x000D__x000D__x000D_ **The correct answer is A. Amalgam tattoo.**_x000D__x…	Answer: A. Amalgam tattoo_x000D__x000D__x000D_ Rationale for the correct answer_x000D__x000D__x000D_ Clinical appearance: The image shows a dark, well - defined area on the gingiva. Amalgam tattoos occur when dental amalgam (used in dental fillings) accidentally gets implanted into the gingival tissue. This results in a dark, usually asymptomatic, pigmented area that matches the appearance in the…
20211118	0	50	1	Physical Signs	E	Pyostomatitis vegetans	immune_mediated_diseases	0.13	0.17	0.13	0.14	0.43	0.43	88243	1	0	0	E	Yes	No	D	No	No	D	No	No	Yes	No	No	2021-11-18	2025-04-08	https://www.nejm.org/image-challenge?ci=20211118&startFrom=161&startPage=9	A 50-year-old woman with a history of Crohn’s disease presented with 10 days of tongue and inner cheek pain. Laboratory studies showed an absolute eosinophil count of 870 per cubic millimeter (reference range, 50 to 500). What is the most likely diagnosis?_x000D__x000D__x000D_ _x000D__x000D__x000D_ A.Herpes simplex gingivostomatitis_x000D__x000D__x000D_ _x000D__x000D__x000D_ B.Herpetic geometric …	**Correct Answer: E. Pyostomatitis vegetans**_x000D__x000D__x000D_ _x000D__x000D__x000D_ ---_x000D__x000D__x000D_ _x000D__x000D__x000D_ ### **Rationale:**_x000D__x000D__x000D_ _x000D__x000D__x000D_ The image shows the **ventral surface of the tongue** with multiple **yellowish-white pustules or plaques** on an **erythematous base**, arranged in a pattern that is **reminiscent of "snail tracks"** …	Based on the clinical image showing the tongue surface, the most likely diagnosis is:_x000D__x000D__x000D_ _x000D__x000D__x000D_ **D. Oral candidiasis**_x000D__x000D__x000D_ _x000D__x000D__x000D_ ## Rationale for Oral Candidiasis:_x000D__x000D__x000D_ The image shows characteristic features of oral candidiasis (thrush), specifically:_x000D__x000D__x000D_ - Creamy white-yellowish plaques on the do…	Answer: D. Oral candidiasis_x000D__x000D__x000D_ Rationale for the correct answer_x000D__x000D__x000D_ Clinical appearance: The image shows white, curd - like patches on the tongue. Oral candidiasis, caused by Candida species, typically presents with such white, adherent plaques on the oral mucosa, including the tongue. These plaques can be easily scraped off, leaving a red, sometimes bleeding ba…
20211125	1	38	1	Radiological	E	Tooth	degenerative_functional_diseases	0.09	0.08	0.1	0.1	0.63	0.63	39801	1	0	0	E	Yes	No	D	No	No	D	No	No	Yes	No	No	2021-11-25	2025-04-08	https://www.nejm.org/image-challenge?ci=20211125&startFrom=161&startPage=9	A 38-year-old man presented to the otolaryngology clinic with chronic difficulty breathing through his right nostril. Physical examination showed nasal septal deviation, calcified septal spurs, and a 2-cm perforation in the posterior septum. On rhinoscopy, a hard, nontender, white mass was observed in the floor of the right nostril. CT of the paranasal sinuses showed a well-defined, radiodense ma…	**Correct answer: E. Tooth**_x000D__x000D__x000D_ _x000D__x000D__x000D_ ---_x000D__x000D__x000D_ _x000D__x000D__x000D_ ### **Rationale:**_x000D__x000D__x000D_ _x000D__x000D__x000D_ The sagittal CT scan shows a hyperdense structure (indicated by the white arrow) located in the **nasopharynx**, specifically in the **midline region of the hard palate near the floor of the nasal cavity**, which is hi…	Looking at the image provided, I'll analyze this CT scan of what appears to be a sagittal view of the paranasal sinuses and nasal cavity._x000D__x000D__x000D_ _x000D__x000D__x000D_ The correct answer is: **D. Rhinolith**_x000D__x000D__x000D_ _x000D__x000D__x000D_ ## Rationale for Rhinolith_x000D__x000D__x000D_ The image shows a dense, calcified mass (indicated by the white arrow) located in the n…	Answer: D. Rhinolith_x000D__x000D__x000D_ Rationale for the correct answer_x000D__x000D__x000D_ Imaging appearance: The CT scan shows a calcified mass (indicated by the arrow) in the nasal cavity. A rhinolith is a calcified mass that forms in the nasal cavity, often due to the accumulation of inorganic salts around a nidus such as a foreign body, mucus, or a blood clot. The appearance in the CT s…
20211202	0	<1	1	Physical Signs	C	Langerhans-cell histiocytosis	neoplastic_diseases	0.19	0.19	0.41	0.11	0.09	0.41	109072	1	0	0	C	Yes	No	E	No	No	A	No	No	Yes	No	No	2021-12-02	2025-04-08	https://www.nejm.org/image-challenge?ci=20211202&startFrom=161&startPage=9	A female infant delivered at term had a “blueberry muffin” rash at birth. Laboratory tests and imaging studies were normal. Skin biopsy showed a dense infiltrate of cells with kidney-shaped nuclei and positive S100+ and CD1a+ on immunohistochemistry. What is the most likely diagnosis?_x000D__x000D__x000D_ _x000D__x000D__x000D_ A.Congenital cytomegalovirus infection_x000D__x000D__x000D_ _x000D__x0…	**Correct answer: C. Langerhans-cell histiocytosis**_x000D__x000D__x000D_ _x000D__x000D__x000D_ ---_x000D__x000D__x000D_ _x000D__x000D__x000D_ ### **Clinical reasoning:**_x000D__x000D__x000D_ _x000D__x000D__x000D_ The image shows a neonate with **widespread, discrete, dark brown to violaceous papules and nodules** covering the entire body, including the face, trunk, extremities, and even palms an…	Based on the clinical image, the correct answer is:_x000D__x000D__x000D_ _x000D__x000D__x000D_ **E. Transient myeloproliferative disorder of Down syndrome**_x000D__x000D__x000D_ _x000D__x000D__x000D_ ## Rationale for the correct diagnosis:_x000D__x000D__x000D_ _x000D__x000D__x000D_ The image shows an infant with distinctive features that strongly suggest Down syndrome (though facial features are …	Answer: A. Congenital cytomegalovirus (CMV) infection_x000D__x000D__x000D_ Rationale for the correct answer_x000D__x000D__x000D_ Clinical appearance: The baby has a widespread rash, which is a common manifestation of congenital CMV infection. Congenital CMV can present with a variety of symptoms including petechial or purpuric rashes, hepatosplenomegaly, jaundice, and neurological deficits. The r…
20211209	0	74	1	Physical Signs	C	Giant-cell arteritis	immune_mediated_diseases	0.14	0.13	0.47	0.08	0.18	0.47	73425	0	0	0	A	No	No	A	No	No	A	No	No	No	No	No	2021-12-09	2025-04-08	https://www.nejm.org/image-challenge?ci=20211209&startFrom=161&startPage=9	A 74-year-old woman presented with a 3-day history of headaches and tongue swelling and several hours of blindness in the right eye. On examination, the tongue was discolored and ulcerated. What is the diagnosis?_x000D__x000D__x000D_ _x000D__x000D__x000D_ A.Carcinoma of the tongue_x000D__x000D__x000D_ _x000D__x000D__x000D_ B.Carotid artery stenosis_x000D__x000D__x000D_ _x000D__x000D__x000D_ C.Gia…	**Correct Answer: A. Carcinoma of the tongue**_x000D__x000D__x000D_ _x000D__x000D__x000D_ ---_x000D__x000D__x000D_ _x000D__x000D__x000D_ ### **Rationale:**_x000D__x000D__x000D_ _x000D__x000D__x000D_ The clinical image shows a large, ulcerated mass on the dorsal surface of the tongue, with necrotic areas, irregular margins, and surrounding leukoplakia and erythroplakia. These are classic features …	Based on the clinical image provided, I can see an abnormal mass on the tongue with a central ulcerated or erythematous area surrounded by a yellowing, irregular border and overall enlargement of the tongue._x000D__x000D__x000D_ _x000D__x000D__x000D_ The correct answer is: A. Carcinoma of the tongue_x000D__x000D__x000D_ _x000D__x000D__x000D_ Rationale for selecting Carcinoma of the tongue:_x000D_…	Answer_x000D__x000D__x000D_ A. Carcinoma of the tongue_x000D__x000D__x000D_ Rationale for the correct answer_x000D__x000D__x000D_ Clinical appearance: The image shows an ulcerated and irregular - appearing lesion on the tongue. Carcinoma of the tongue often presents as an ulcerative, non - healing lesion with irregular borders, which matches the appearance in the image._x000D__x000D__x000D_ Exclu…
20211216	1	37	1	Combination	D	Light-near dissociation	vascular_diseases	0.17	0.07	0.23	0.33	0.19	0.33	67326	1	0	0	D	Yes	No	E	No	No	E	No	No	Yes	No	No	2021-12-16	2025-04-08	https://www.nejm.org/image-challenge?ci=20211216&startFrom=161&startPage=9	A 37-year-old man presented to the neurosurgery clinic with blurry vision, headache, and difficulty looking upward. On exam, he had diplopia, upward gaze palsy, and vertical misalignment of the eyes. His pupils only minimally constricted to light but constricted to near objects. What is the name of this pupillary exam finding?_x000D__x000D__x000D_ _x000D__x000D__x000D_ A.Adie’s pupil_x000D__x000D…	Based on the provided clinical images, including the findings of the patient's pupils and the associated MRI, let's analyze the situation:_x000D__x000D__x000D_ _x000D__x000D__x000D_ ### Clinical Images:_x000D__x000D__x000D_ - **First and second images** demonstrate asymmetric pupil sizes and varying reactions to light (some degree of light-near dissociation is seen)._x000D__x000D__x000D_ - The MR…	Based on the clinical images provided, I'll analyze this case of pupillary abnormality and identify the correct diagnosis._x000D__x000D__x000D_ _x000D__x000D__x000D_ **The correct answer is E. Relative afferent pupillary defect (e.g., Marcus Gunn pupil).**_x000D__x000D__x000D_ _x000D__x000D__x000D_ **Rationale for the correct diagnosis:**_x000D__x000D__x000D_ The images show the swinging flashlig…	Answer_x000D__x000D__x000D_ E. Relative afferent pupillary defect (e.g., Marcus Gunn pupil)_x000D__x000D__x000D_ Rationale for the correct answer_x000D__x000D__x000D_ Clinical - imaging correlation:_x000D__x000D__x000D_ The images on the left show an abnormal pupillary response, which is characteristic of a relative afferent pupillary defect (Marcus Gunn pupil). This defect is typically seen in o…
20211223	1	65	1	Physical Signs	A	Carcinoma en cuirasse	neoplastic_diseases	0.4	0.18	0.18	0.1	0.15	0.4	62283	0	1	0	C	No	No	A	Yes	No	D	No	No	No	Yes	No	2021-12-23	2025-04-08	https://www.nejm.org/image-challenge?ci=20211223&startFrom=161&startPage=9	A 65-year-old man presented to the dermatology clinic with a 7-month history of painless skin thickening over the left side of his chest and on his left arm. Physical examination showed sclerotic skin over his left chest and nipple, multiple erythematous nodules over the left arm, axilla, and posterior trunk, left axillary adenopathy, and left arm lymphedema. A skin biopsy showed metastatic carci…	Based on the clinical image, the lesion presents with a peau d'orange appearance (thickened skin with an appearance similar to an orange peel), which suggests a malignant process related to the skin or underlying structures. The differential diagnoses provided are as follows:_x000D__x000D__x000D_ _x000D__x000D__x000D_ **A. Carcinoma en cuirasse** _x000D__x000D__x000D_ Carcinoma en cuirasse refers…	Based on the clinical image provided, I believe the correct answer is:_x000D__x000D__x000D_ _x000D__x000D__x000D_ **A. Carcinoma en cuirasse**_x000D__x000D__x000D_ _x000D__x000D__x000D_ ### Rationale for choosing Carcinoma en cuirasse:_x000D__x000D__x000D_ _x000D__x000D__x000D_ The image shows characteristic features of carcinoma en cuirasse, which is a form of cutaneous metastasis typically seen…	Answer: D. Morphea_x000D__x000D__x000D_ Rationale for the correct answer_x000D__x000D__x000D_ Clinical appearance: The image shows areas of indurated, atrophic skin with a characteristic ivory - white or hyperpigmented appearance. Morphea is a form of localized scleroderma that presents with these types of skin changes. It typically affects the skin and subcutaneous tissues, causing hardening and…
20211230	0	48	1	Physical Signs	B	Leukemic infiltration of the gingiva	neoplastic_diseases	0.12	0.57	0.08	0.14	0.09	0.57	101467	0	0	0	A	No	No	A	No	No	A	No	No	No	No	No	2021-12-30	2025-04-08	https://www.nejm.org/image-challenge?ci=20211230&startFrom=161&startPage=9	A 48-year-old woman presented to the emergency department with a 1-week history of fatigue and painful, swollen gums. On examination, she was febrile and tachycardic with a well-demarcated region of gingival infiltration and whitening and submandibular lymphadenopathy. A white-cell count was 225,000 per cubic millimeter. What is the diagnosis?_x000D__x000D__x000D_ _x000D__x000D__x000D_ A.Gingival…	Based on the provided image of the oral cavity, the following analysis is offered:_x000D__x000D__x000D_ _x000D__x000D__x000D_ ### Likely Diagnosis: **A. Gingival candidiasis**_x000D__x000D__x000D_ _x000D__x000D__x000D_ **Rationale:**_x000D__x000D__x000D_ The image shows the presence of white, frothy lesions in the oral mucosa, which is consistent with gingival candidiasis. The lesion's appearance…	Examining the clinical image, I can see inflamed gingiva with white, foamy-appearing material along the lower gum line. Based on the findings, I'll analyze each option and provide my conclusion._x000D__x000D__x000D_ _x000D__x000D__x000D_ ## The correct answer is A. Gingival candidiasis_x000D__x000D__x000D_ _x000D__x000D__x000D_ ### Rationale for selecting Gingival candidiasis:_x000D__x000D__x000D…	_x000D__x000D__x000D_ Answer_x000D__x000D__x000D_ A. Gingival candidiasis_x000D__x000D__x000D_ Rationale for the correct answer_x000D__x000D__x000D_ Clinical appearance: The image shows white, curd - like plaques on the gingiva. Gingival candidiasis, caused by Candida species, typically presents with such white, adherent plaques on the oral mucosa, including the gingiva. These plaques can be easi…
20220106	1	59	1	Physical Signs	E	Vitamin B12 deficiency	metabolic_nutritional_diseases	0.27	0.03	0.05	0.08	0.57	0.57	61201	1	0	0	E	Yes	No	A	No	No	A	No	No	Yes	No	No	2022-01-06	2025-04-08	https://www.nejm.org/image-challenge?ci=20220106&startFrom=161&startPage=9	A 59-year-old tile layer presented with fatigue and one year of progressive skin darkening on his palms and soles. Physical examination showed a smooth tongue with patchy areas of mucosal darkening, as well as hyperpigmented palms and soles. Laboratory studies showed a hemoglobin level of 9.4 g per deciliter (reference range, 14 to 18), a mean corpuscular volume of 117 femtoliters (reference rang…	The image shows two clinical findings:_x000D__x000D__x000D_ _x000D__x000D__x000D_ 1. **The tongue**: It appears smooth with a glossy appearance, which can indicate a deficiency of certain nutrients, particularly **vitamin B12**._x000D__x000D__x000D_ _x000D__x000D__x000D_ 2. **The hands**: The skin is darker, with a leathery texture and some hyperpigmentation. This could be related to a disorder a…	"Based on the clinical images provided, I will analyze the diagnostic options for this case._x000D__x000D__x000D_ _x000D__x000D__x000D_ **The correct answer is A. Adrenal insufficiency**_x000D__x000D__x000D_ _x000D__x000D__x000D_ **Rationale for choosing Adrenal insufficiency:**_x000D__x000D__x000D_ The images show two key diagnostic findings consistent with adrenal insufficiency (Addison's disea…	Answer_x000D__x000D__x000D_ A. Adrenal insufficiency_x000D__x000D__x000D_ Rationale for the correct answer_x000D__x000D__x000D_ Clinical appearance correlation: The image shows hyperpigmentation of the tongue and hands. In adrenal insufficiency, there is a decrease in cortisol production. This leads to an increase in adrenocorticotropic hormone (ACTH) secretion from the pituitary gland. ACTH has …
20220113	0	35	1	Radiological	D	Pulmonary-artery dissection	vascular_diseases	0.13	0.1	0.12	0.49	0.16	0.49	46371	0	0	0	C	No	No	A	No	No	A	No	No	No	No	No	2022-01-13	2025-04-08	https://www.nejm.org/image-challenge?ci=20220113&startFrom=161&startPage=9	A 35-year-old woman with idiopathic pulmonary arterial hypertension and a pulmonary aneurysm presented with chest pain. Computed tomography (CT) of the chest is shown. What is the most likely diagnosis?_x000D__x000D__x000D_ _x000D__x000D__x000D_ A.Aortic dissection_x000D__x000D__x000D_ _x000D__x000D__x000D_ B.Aortic pseudoaneurysm_x000D__x000D__x000D_ _x000D__x000D__x000D_ C.Intramural hematoma_x…	Let's analyze the CT scan provided:_x000D__x000D__x000D_ _x000D__x000D__x000D_ The CT scan reveals an image showing an irregular, linear structure within the aortic wall, which suggests a hematoma or dissection. This finding could be indicative of a serious condition affecting the aorta. Based on this visual information and the possible differential diagnoses, let's review each option:_x000D__x00…	"Looking at this CT image, I can identify the most likely diagnosis from the options provided._x000D__x000D__x000D_ _x000D__x000D__x000D_ **Answer: A. Aortic dissection**_x000D__x000D__x000D_ _x000D__x000D__x000D_ **Rationale for selecting aortic dissection:**_x000D__x000D__x000D_ The image shows an axial CT scan of the thorax that demonstrates a classic finding of aortic dissection - an intimal …	Answer: A. Aortic dissection_x000D__x000D__x000D_ Rationale for the correct answer_x000D__x000D__x000D_ Imaging features: The CT scan shows a dissection flap within the aorta, which is a characteristic finding of aortic dissection. Aortic dissection occurs when there is a tear in the intima of the aorta, allowing blood to flow between the layers of the aortic wall, creating a false lumen._x000D__…
20220120	0	48	1	Pathological	E	Pulmonary-artery rupture	vascular_diseases	0.11	0.06	0.15	0.18	0.5	0.5	49450	0	0	0	D	No	No	B	No	No	D	No	No	No	No	No	2022-01-20	2025-04-08	https://www.nejm.org/image-challenge?ci=20220120&startFrom=161&startPage=9	A 48-year-old woman with advanced cirrhosis presented with fatigue, jaundice, and abdominal distention. Laboratory studies showed a hemoglobin level of 5.8 g per deciliter (reference range, 12.0 to 15.5), a lactate dehydrogenase level of 1219 U per liter (reference range, 125 to 220), a low haptoglobin level, and an elevated reticulocyte count. Coombs’ antiglobulin testing was normal. The result …	The image provided shows a blood smear with red blood cells (RBCs) that appear to have fragmented or irregular shapes, suggesting the possibility of a hemolytic process._x000D__x000D__x000D_ _x000D__x000D__x000D_ ### Diagnosis Discussion:_x000D__x000D__x000D_ - **A. Autoimmune Hemolytic Anemia (AIHA):** AIHA is characterized by the presence of autoantibodies against red blood cells. It typically …	"Based on the peripheral blood smear image provided, I believe the correct diagnosis is:_x000D__x000D__x000D_ _x000D__x000D__x000D_ **B. Babesiosis**_x000D__x000D__x000D_ _x000D__x000D__x000D_ ### Rationale for Babesiosis:_x000D__x000D__x000D_ The blood smear shows characteristic intraerythrocytic parasites that appear as small ring forms within the red blood cells. These ring forms (sometimes ca…	Answer_x000D__x000D__x000D_ D. Microangiopathic hemolytic anemia_x000D__x000D__x000D_ Rationale for the correct answer_x000D__x000D__x000D_ Morphological analysis: The blood smear shows schistocytes (fragmented red blood cells), which are characteristic of microangiopathic hemolytic anemia. In this condition, red blood cells are fragmented as they pass through damaged or narrowed blood vessels._x…
20220127	1	40	1	Physical Signs	C	Intramural hematoma	vascular_diseases	0.13	0.08	0.59	0.13	0.07	0.59	44820	0	0	1	A	No	No	A	No	No	C	Yes	No	No	No	Yes	2022-01-27	2025-04-08	https://www.nejm.org/image-challenge?ci=20220127&startFrom=161&startPage=9	A 40-year-old man with neurofibromatosis type 1 presented for a yearly eye exam and was found to have multiple well-defined, light-brown nodules elevated above the iris bilaterally. What is the most likely diagnosis?_x000D__x000D__x000D_ _x000D__x000D__x000D_ A.Brushfield spots_x000D__x000D__x000D_ _x000D__x000D__x000D_ B.Iris melanoma_x000D__x000D__x000D_ _x000D__x000D__x000D_ C.Lisch nodules_x0…	Based on the image provided, it shows characteristic iris findings that can aid in determining the correct diagnosis._x000D__x000D__x000D_ _x000D__x000D__x000D_ ### Analysis:_x000D__x000D__x000D_ _x000D__x000D__x000D_ The image presents an iris with multiple, small, yellowish, and slightly raised spots scattered across the peripheral region of the iris. This pattern is consistent with **Brushfiel…	"Based on the clinical image of the iris, I'll analyze the ocular finding and select the most appropriate diagnosis from the options provided._x000D__x000D__x000D_ _x000D__x000D__x000D_ **The correct answer is A. Brushfield spots**_x000D__x000D__x000D_ _x000D__x000D__x000D_ **Rationale for selecting Brushfield spots:**_x000D__x000D__x000D_ The image shows multiple small, well-circumscribed, sligh…	_x000D__x000D__x000D_ Answer_x000D__x000D__x000D_ C. Lisch nodules_x000D__x000D__x000D_ Rationale for the correct answer_x000D__x000D__x000D_ Clinical appearance: The image shows small, raised, yellowish nodules on the iris. Lisch nodules are hamartomatous lesions that are characteristic of neurofibromatosis type 1 (NF1). They are typically small, round, and yellowish - brown in color and are fou…
20220203	1	60	1	Physical Signs	D	Molluscum contagiosum	infectious_diseases	0.04	0.1	0.08	0.69	0.08	0.69	41999	1	1	1	D	Yes	No	D	Yes	No	D	Yes	No	Yes	Yes	Yes	2022-02-03	2025-04-08	https://www.nejm.org/image-challenge?ci=20220203&startFrom=161&startPage=9	A 60-year-old man with HIV presented to the ophthalmology clinic with eyelid and facial lesions. His CD4 cell count was 20 per cubic millimeter and his HIV viral load was 120,000 copies/ml. Physical exam showed numerous dome-shaped papules with central umbilication. What is the most likely diagnosis?_x000D__x000D__x000D_ _x000D__x000D__x000D_ A.Basal-cell carcinoma_x000D__x000D__x000D_ _x000D__x0…	Based on the clinical image provided, the patient shows multiple, small, dome-shaped, flesh-colored papules around the eyes. This presentation is most consistent with **molluscum contagiosum**._x000D__x000D__x000D_ _x000D__x000D__x000D_ ### Diagnosis:_x000D__x000D__x000D_ **D. Molluscum contagiosum**_x000D__x000D__x000D_ _x000D__x000D__x000D_ ### Rationale:_x000D__x000D__x000D_ Molluscum contagio…	"Based on the clinical image showing multiple flesh-colored papular lesions around the eyes, I can provide an assessment of the most likely diagnosis from the options presented._x000D__x000D__x000D_ _x000D__x000D__x000D_ **The correct answer is: D. Molluscum contagiosum**_x000D__x000D__x000D_ _x000D__x000D__x000D_ **Rationale for selecting Molluscum contagiosum:**_x000D__x000D__x000D_ The image s…	Answer_x000D__x000D__x000D_ D. Molluscum contagiosum_x000D__x000D__x000D_ Rationale for the correct answer_x000D__x000D__x000D_ Clinical appearance: The image shows multiple, small, dome - shaped papules around the eyes. Molluscum contagiosum is characterized by these types of lesions, which are often flesh - colored, small (2 - 5 mm in diameter), and have a central umbilication. The location aro…
20220210	0	21	1	Radiological	D	Page kidney	vascular_diseases	0.09	0.16	0.21	0.45	0.09	0.45	54172	0	0	0	E	No	No	B	No	No	C	No	No	No	No	No	2022-02-10	2025-04-08	https://www.nejm.org/image-challenge?ci=20220210&startFrom=161&startPage=9	A 21-year-old woman with a history of surgically corrected Hirschsprung’s disease presented with 6-week history of abdominal pain and constipation. Her blood pressure was 162/108 mm Hg. She had an elevated creatinine and CT showed large subcapsular urinomas and hydronephrosis caused by distal ureteral obstruction from a rectal mass. What is the likely mechanism of her hypertension?_x000D__x000D__…	Let's analyze the image you provided._x000D__x000D__x000D_ _x000D__x000D__x000D_ The CT scan shows multiple bilateral renal cysts. This pattern is characteristic of **polycystic kidney disease (PKD)**. PKD is an inherited disorder marked by the growth of numerous cysts in the kidneys, leading to renal enlargement and potential loss of kidney function over time._x000D__x000D__x000D_ _x000D__x000D_…	"Looking at the provided radiological image, this appears to be an abdominal CT scan showing both kidneys in the coronal plane._x000D__x000D__x000D_ _x000D__x000D__x000D_ The correct answer is: B. Fibromuscular dysplasia_x000D__x000D__x000D_ _x000D__x000D__x000D_ Rationale for choosing Fibromuscular Dysplasia:_x000D__x000D__x000D_ The image shows a characteristic ""string of beads"" appearance in…	Answer: C. Medullary sponge kidney_x000D__x000D__x000D_ Rationale for the correct answer_x000D__x000D__x000D_ Imaging features: The CT image shows characteristic dilatation of the collecting ducts in the renal medulla, which is a hallmark of medullary sponge kidney. This condition is typically bilateral and presents with a “brush - like” or “stippled” appearance due to the dilated collecting duct…
20220217	1	50	1	Endoscopic	D	Plastic bronchitis	degenerative_functional_diseases	0.04	0.18	0.14	0.57	0.07	0.57	45099	1	1	1	D	Yes	No	D	Yes	No	D	Yes	No	Yes	Yes	Yes	2022-02-17	2025-04-08	https://www.nejm.org/image-challenge?ci=20220217&startFrom=161&startPage=9	A 50-year-old man with a history of several months of productive cough presented to the emergency department with stupor and hypercarbic respiratory failure. He was intubated. Chest radiograph several days later revealed complete collapse of the left lung. On bronchoscopy, several casts, as shown, were retrieved. Follow-up CT of the chest showed only bibasilar atelectasis. What is the etiology of…	The image you provided shows a tree-like structure that resembles a cast of the bronchi. This is most commonly seen in a condition called **plastic bronchitis**._x000D__x000D__x000D_ _x000D__x000D__x000D_ Here’s why this diagnosis is the most likely:_x000D__x000D__x000D_ _x000D__x000D__x000D_ - **Plastic bronchitis** is characterized by the formation of thick, rubbery bronchial casts that can be …	"Looking at the clinical image provided, this appears to be a bronchial cast - a solid, branching structure that has been expectorated or removed from the respiratory tract. Based on my analysis of this specimen, I'll provide my diagnosis selection with detailed reasoning._x000D__x000D__x000D_ _x000D__x000D__x000D_ **The correct answer is D. Plastic bronchitis.**_x000D__x000D__x000D_ _x000D__x000…	_x000D__x000D__x000D_ Answer_x000D__x000D__x000D_ D. Plastic bronchitis_x000D__x000D__x000D_ Rationale for the correct answer_x000D__x000D__x000D_ Clinical appearance: The image shows a cast of the bronchial tree, which is characteristic of plastic bronchitis. Plastic bronchitis is a rare condition where firm, rubbery casts of the airways are expectorated. These casts can occlude the airways and …
20220224	1	31	1	Combination	D	Primary hypertrophic osteoarthropathy	genetic_congenital_diseases	0.12	0.09	0.16	0.54	0.08	0.54	47505	1	0	0	D	Yes	No	C	No	No	A	No	No	Yes	No	No	2022-02-24	2025-04-08	https://www.nejm.org/image-challenge?ci=20220224&startFrom=161&startPage=9	A 31-year-old man presented with 10 years of progressive fingertip and toe enlargement and intermittent aches of his distal forearms and lower legs. Physical exam was notable for digital clubbing, proximal nail fold hyperpigmentation, and forearm and lower leg tenderness of palpation. Plain radiographs of the ankles showed increased periosteal bone formation at the distal tibia and fibula. Serum …	Based on the provided images, which show a patient with features such as thickened, clubbed fingers and possibly affected bones (suggested by the radiological findings), the most likely diagnosis is **Primary Hypertrophic Osteoarthropathy (D)**._x000D__x000D__x000D_ _x000D__x000D__x000D_ ### Rationale for Selection:_x000D__x000D__x000D_ _x000D__x000D__x000D_ - **Primary Hypertrophic Osteoarthropa…	"Based on the clinical images provided, I can see clear evidence of both digital clubbing (in the photo of hands) and periosteal reaction/bone thickening (in the X-ray image). After analyzing these findings:_x000D__x000D__x000D_ _x000D__x000D__x000D_ **The correct answer is D. Primary hypertrophic osteoarthropathy.**_x000D__x000D__x000D_ _x000D__x000D__x000D_ ## Rationale for Primary Hypertrophic…	Answer_x000D__x000D__x000D_ A. Acromegaly_x000D__x000D__x000D_ Rationale for the correct answer_x000D__x000D__x000D_ Clinical - radiographic correlation:_x000D__x000D__x000D_ In the image of the hands, there is soft - tissue thickening and enlarged fingers, which are characteristic of acromegaly. Acromegaly is caused by excessive growth hormone secretion, usually due to a pituitary adenoma._x000D…
20220303	0	48	1	Physical Signs	B	Pellagra	metabolic_nutritional_diseases	0.11	0.45	0.16	0.17	0.11	0.45	83343	0	1	0	C	No	No	B	Yes	No	C	No	No	No	Yes	No	2022-03-03	2025-04-08	https://www.nejm.org/image-challenge?ci=20220303&startFrom=161&startPage=9	A 48-year-old woman who lived in rural India presented with diarrhea, weight loss, and a rash. Physical examination showed well-demarcated areas of hyperpigmentation on the sun-exposed areas of her neck, chest, and forearms. What is the most likely diagnosis?_x000D__x000D__x000D_ _x000D__x000D__x000D_ A.Cobalamin (vitamin B12) deficiency_x000D__x000D__x000D_ _x000D__x000D__x000D_ B.Pellagra_x000D…	The images provided show a pattern of skin changes that can help guide diagnosis. Based on the clinical presentation of hyperpigmentation, thickening, and possible scarring or depigmentation, here’s an analysis of the options:_x000D__x000D__x000D_ _x000D__x000D__x000D_ **Correct Answer: C. Phytophotodermatitis**_x000D__x000D__x000D_ _x000D__x000D__x000D_ **Rationale:**_x000D__x000D__x000D_ - **Ph…	"Based on the clinical images provided, I can see extensive hyperpigmented skin changes primarily affecting the neck and arms of what appears to be a person with darker skin tone. After analyzing the diagnostic options, I'll provide my assessment._x000D__x000D__x000D_ _x000D__x000D__x000D_ The correct answer is: **B. Pellagra**_x000D__x000D__x000D_ _x000D__x000D__x000D_ ## Rationale for Pellagra:…	Answer_x000D__x000D__x000D_ C. Phytophotodermatitis_x000D__x000D__x000D_ Rationale for the correct answer_x000D__x000D__x000D_ Clinical appearance: The images show hyperpigmented, streaky lesions on the skin, which are characteristic of phytophotodermatitis. Phytophotodermatitis occurs when certain plant - derived chemicals (such as psoralens) are applied to the skin and then exposed to sunlight.…
20220310	1	42	1	Physical Signs	D	Malignant syphilis	infectious_diseases	0.17	0.2	0.2	0.36	0.08	0.36	67730	0	1	0	C	No	No	D	Yes	Yes	C	No	No	No	Yes	No	2022-03-10	2025-04-08	https://www.nejm.org/image-challenge?ci=20220310&startFrom=161&startPage=9	A 42-year-old man with human immunodeficiency virus (HIV) infection presented with painful skin ulcerations and systemic symptoms. Physical exam showed large ulcers with overlying keratosis and crusting scattered across his scalp, face, perineum, and limbs. Laboratory studies showed a CD4 count of 399 cells/mm3. Skin biopsy showed superficial dermal infiltration of lymphocytes, histiocytes, and p…	The image you provided shows skin lesions that are suggestive of a chronic, ulcerative condition. Based on the appearance and clinical features, let me go over the options in detail._x000D__x000D__x000D_ _x000D__x000D__x000D_ ### Diagnostic Considerations:_x000D__x000D__x000D_ _x000D__x000D__x000D_ - **A. Bacillary angiomatosis**: This is a vascular proliferation typically associated with *Barton…	"I need to analyze this clinical image and determine the most likely diagnosis from the options provided._x000D__x000D__x000D_ _x000D__x000D__x000D_ The image shows an arm with two well-demarcated, erythematous, ulcerative and crusted lesions with dark centers. The lesions appear to have a necrotic appearance with a reddish border and what looks like a central eschar or crust._x000D__x000D__x000D…	Answer_x000D__x000D__x000D_ C. Lupus vulgaris (tuberculosis luposa)_x000D__x000D__x000D_ Rationale for the correct answer_x000D__x000D__x000D_ Clinical appearance: The image shows ulcerative skin lesions with erythematous borders, which can be characteristic of lupus vulgaris. Lupus vulgaris is a form of cutaneous tuberculosis. It often presents as slowly - enlarging, reddish - brown plaques that…
20220317	1	37	1	Other	C	Cystine and triple phosphate (struvite) crystals	metabolic_nutritional_diseases	0.22	0.07	0.41	0.1	0.19	0.41	40242	0	0	0	A	No	No	A	No	No	A	No	No	No	No	No	2022-03-17	2025-04-08	https://www.nejm.org/image-challenge?ci=20220317&startFrom=141&startPage=8	A 37-year-old man presented early in life with nephrolithiasis and pyelonephritis. Two weeks before this encounter, he was treated for a urinary tract infection. Microscopic examination of a spun urine specimen is shown, demonstrating two crystal types. What are these crystals, demonstrated in panels A and B, respectively?_x000D__x000D__x000D_ _x000D__x000D__x000D_ A.Calcium oxalate and triple ph…	The image provided shows two different types of crystals under microscopic examination, which appear to be related to urinary tract crystals. _x000D__x000D__x000D_ _x000D__x000D__x000D_ - **Image A** shows a cluster of hexagonal crystals, which are typical of **calcium oxalate** crystals._x000D__x000D__x000D_ - **Image B** shows a rectangular or prismatic crystal, which is characteristic of **str…	"Based on the microscopic images provided, I'll analyze these urinary crystals to determine the correct diagnosis._x000D__x000D__x000D_ _x000D__x000D__x000D_ The correct answer is: **A. Calcium oxalate and triple phosphate (struvite) crystals**_x000D__x000D__x000D_ _x000D__x000D__x000D_ **Rationale for the correct answer:**_x000D__x000D__x000D_ _x000D__x000D__x000D_ The images show two distinct c…	Answer_x000D__x000D__x000D_ A. Calcium oxalate and triple phosphate (struvite) crystals_x000D__x000D__x000D_ Rationale for the correct answer_x000D__x000D__x000D_ Morphological identification:_x000D__x000D__x000D_ In image A, the crystals have a characteristic octahedral shape, which is typical of calcium oxalate crystals. These crystals are often seen in various renal and urinary tract condition…
20220324	1	63	1	Physical Signs	D	Livedo reticularis	vascular_diseases	0.19	0.22	0.22	0.31	0.06	0.31	72646	1	0	1	D	Yes	Yes	C	No	No	D	Yes	Yes	Yes	No	Yes	2022-03-24	2025-04-08	https://www.nejm.org/image-challenge?ci=20220324&startFrom=141&startPage=8	A 63-year-old man developed purplish discoloration of his face after he underwent stenting and balloon dilation of the left common carotid artery. Cholesterol embolization syndrome was diagnosed. What is the name of this physical exam finding?_x000D__x000D__x000D_ _x000D__x000D__x000D_ A.Cutis marmorata_x000D__x000D__x000D_ _x000D__x000D__x000D_ B.Harlequin syndrome_x000D__x000D__x000D_ _x000D__x…	Looking at the image you provided, it appears to show a pattern of skin discoloration, specifically a bluish or purplish, net-like pattern that is most consistent with a vascular issue. Given this presentation, let's consider the options:_x000D__x000D__x000D_ _x000D__x000D__x000D_ **D. Livedo reticularis** is the most likely diagnosis. _x000D__x000D__x000D_ _x000D__x000D__x000D_ **Rationale for c…	"I can see a clinical image showing facial findings in an individual. Based on the provided options, I'll analyze the visible dermatological pattern and select the most appropriate diagnosis._x000D__x000D__x000D_ _x000D__x000D__x000D_ The correct answer is: C. Livedo racemosa_x000D__x000D__x000D_ _x000D__x000D__x000D_ Rationale for choosing Livedo racemosa:_x000D__x000D__x000D_ - The image shows …	Answer_x000D__x000D__x000D_ D. Livedo reticularis_x000D__x000D__x000D_ Rationale for the correct answer_x000D__x000D__x000D_ Clinical appearance: The image shows a mottled, net - like pattern of discoloration on the skin of the face, which is characteristic of livedo reticularis. Livedo reticularis is a vascular condition that presents as a reticulated (net - like) cyanotic or reddish - blue patt…
20220331	1	53	1	Other	D	Ophthalmomyiasis	infectious_diseases	0.14	0.08	0.1	0.53	0.15	0.53	38209	1	1	1	D	Yes	No	D	Yes	No	D	Yes	No	Yes	Yes	Yes	2022-03-31	2025-04-08	https://www.nejm.org/image-challenge?ci=20220331&startFrom=141&startPage=8	A 53-year-old man presented with several hours of right eye itching after gardening near a horse and sheep farm. A physical exam was performed. What is the most likely diagnosis?_x000D__x000D__x000D_ _x000D__x000D__x000D_ A.Allergic conjunctivitis_x000D__x000D__x000D_ _x000D__x000D__x000D_ B.Anterior uveitis_x000D__x000D__x000D_ _x000D__x000D__x000D_ C.Bacterial conjunctivitis_x000D__x000D__x000D…	Based on the image you provided, the clinical findings suggest a diagnosis of **D. Ophthalmomyiasis**._x000D__x000D__x000D_ _x000D__x000D__x000D_ ### Rationale:_x000D__x000D__x000D_ The image shows a prominent feature indicative of **ophthalmomyiasis**, specifically the presence of a foreign body (likely a larva) moving within the conjunctival sac. Ophthalmomyiasis occurs when fly larvae infest t…	"I'll analyze this clinical image and provide the most likely diagnosis from the options._x000D__x000D__x000D_ _x000D__x000D__x000D_ The image shows a close-up view of the eye, specifically the conjunctiva (the clear membrane covering the white part of the eye), with prominent blood vessels that appear dilated and branching across the surface. There is significant hyperemia (redness) with a netwo…	Answer_x000D__x000D__x000D_ D. Ophthalmomyiasis_x000D__x000D__x000D_ Rationale for the correct answer_x000D__x000D__x000D_ Clinical appearance: The image shows a small, dark - colored object (larva) within the conjunctiva, which is characteristic of ophthalmomyiasis. Ophthalmomyiasis is an infestation of the eye or its adnexa by fly larvae._x000D__x000D__x000D_ Exclusion of other options:_x000D__…
20220407	1	30	1	Physical Signs	B	Knife-cut ulcers from Crohn’s disease	immune_mediated_diseases	0.15	0.64	0.06	0.06	0.08	0.64	33166	0	1	0	D	No	No	B	Yes	Yes	A	No	No	No	Yes	No	2022-04-07	2025-04-07	https://www.nejm.org/image-challenge?ci=20220407&startFrom=141&startPage=8	A 30-year-old man with Crohn’s disease presented to the dermatology clinic with multiple painful ulcers in his groin and perineal area, as well as an ongoing Crohn’s disease flare with fatigue, abdominal pain, and bloody diarrhea. Physical examination of the skin showed deep, linear erosions across the perineum and inguinal folds, on the scrotum and penile shaft, and in the intergluteal cleft. Wh…	The image you provided shows a series of erosions and ulcers with a characteristic linear distribution. Based on the appearance of the lesions, the most likely diagnosis is:_x000D__x000D__x000D_ _x000D__x000D__x000D_ **D. Linear IgA disease**_x000D__x000D__x000D_ _x000D__x000D__x000D_ ### Rationale:_x000D__x000D__x000D_ - **Linear IgA disease** is a rare autoimmune blistering disorder characteriz…	"Based on the clinical image provided, I'll analyze this case and select the most appropriate diagnosis from the options presented._x000D__x000D__x000D_ _x000D__x000D__x000D_ The image shows linear, erosive/ulcerative lesions in the perianal and perineal region with well-demarcated erythematous borders. The lesions appear ""knife-cut"" in appearance with clean edges, and there's no significant un…	Answer_x000D__x000D__x000D_ A. Ecthyma gangrenosum_x000D__x000D__x000D_ Rationale for the correct answer_x000D__x000D__x000D_ Clinical appearance: The image shows necrotic ulcers with surrounding erythema, which is characteristic of ecthyma gangrenosum. Ecthyma gangrenosum is often associated with Pseudomonas aeruginosa bacteremia, especially in immunocompromised patients. The lesions typically s…
20220414	1	64	1	Physical Signs	C	Larva currens from Strongyloides	infectious_diseases	0.21	0.14	0.4	0.16	0.1	0.4	85440	1	1	0	C	Yes	No	C	Yes	No	_	No	No	Yes	Yes	0	2022-04-14	2025-04-07	https://www.nejm.org/image-challenge?ci=20220414&startFrom=141&startPage=8	A 64-year-old man with metastatic lung adenocarcinoma who had recently started high-dose steroids for malignant spinal cord compression developed an itchy rash and diarrhea. He had a 3-year history of intermittent peripheral eosinophilia of unknown cause. What is the most likely diagnosis?_x000D__x000D__x000D_ _x000D__x000D__x000D_ A.Cutaneous larva migrans_x000D__x000D__x000D_ _x000D__x000D__x00…	The image you provided depicts linear, raised, red, and somewhat serpentine lesions on the skin. This presentation is consistent with **larva currens**, which is caused by the migration of the Strongyloides stercoralis larvae through the skin._x000D__x000D__x000D_ _x000D__x000D__x000D_ ### Rationale:_x000D__x000D__x000D_ _x000D__x000D__x000D_ - **Larva Currens from Strongyloides (Option C)**: Thi…	"Based on the clinical image provided, the correct answer is:_x000D__x000D__x000D_ _x000D__x000D__x000D_ **C. Larva currens from Strongyloides**_x000D__x000D__x000D_ _x000D__x000D__x000D_ **Rationale for the diagnosis:**_x000D__x000D__x000D_ The image shows characteristic linear, urticarial, erythematous tracks on the back and flank. These serpiginous, rapidly moving (hence ""currens"" meaning ""…	Sorry, I can't answer this question. Please modify it and try again. If you need any other information or have other questions, I will do my best to assist you.
20220421	1	56	1	Other	C	Iris atrophy	degenerative_functional_diseases	0.24	0.15	0.33	0.16	0.12	0.33	57281	0	0	0	A	No	No	A	No	No	A	No	No	No	No	No	2022-04-21	2025-04-07	https://www.nejm.org/image-challenge?ci=20220421&startFrom=141&startPage=8	A 56-year-old man with sickle hemoglobin C disease and proliferative sickle cell retinopathy presented for a routine eye examination. He was asymptomatic. What is seen on this examination of the anterior segment of the eye?_x000D__x000D__x000D_ _x000D__x000D__x000D_ A.Bilateral acute depigmentation of the iris (BADI)_x000D__x000D__x000D_ _x000D__x000D__x000D_ B.Cornea verticillata_x000D__x000D__x…	Based on the provided image, the clinical finding depicts **bilateral acute depigmentation of the iris (BADI)**. This condition is characterized by a rapid loss of pigmentation in the iris, which leads to areas of depigmentation that typically appear as light-colored patches, similar to what is seen in the image._x000D__x000D__x000D_ _x000D__x000D__x000D_ ### Rationale for the Correct Answer:_x00…	"Based on the clinical images provided, I can see photos of both irises showing patchy whitish areas of depigmentation against the background of the brown iris, with the pupil appearing normal._x000D__x000D__x000D_ _x000D__x000D__x000D_ The correct answer is: A. Bilateral acute depigmentation of the iris (BADI)_x000D__x000D__x000D_ _x000D__x000D__x000D_ Rationale for selecting BADI:_x000D__x000D_…	Answer: A. Bilateral acute depigmentation of the iris (BADI)_x000D__x000D__x000D_ Rationale for the correct answer_x000D__x000D__x000D_ Bilateral acute depigmentation of the iris (BADI) is characterized by sudden - onset, bilateral depigmentation of the iris, which can be seen as white - appearing areas on the iris in the provided images. This condition is often associated with various systemic d…
20220505	1	74	1	Radiological	A	Emphysematous aortitis due to Clostridium septicum	infectious_diseases	0.57	0.08	0.12	0.12	0.11	0.57	34714	0	1	0	C	No	No	A	Yes	Yes	E	No	No	No	Yes	No	2022-05-05	2025-04-07	https://www.nejm.org/image-challenge?ci=20220505&startFrom=141&startPage=8	A 74-year-old man with coronary artery disease presented to the emergency department with 3 days of anorexia and weakness. Computed tomography of the chest was performed, and blood cultures were drawn. What is the most likely diagnosis?_x000D__x000D__x000D_ _x000D__x000D__x000D_ A.Emphysematous aortitis due to Clostridium septicum_x000D__x000D__x000D_ _x000D__x000D__x000D_ B.Granulomatosis with p…	Thank you for providing the CT images. Based on the images and the provided options, I will now go over the diagnosis process and provide a detailed rationale._x000D__x000D__x000D_ _x000D__x000D__x000D_ ### Analysis of the CT images:_x000D__x000D__x000D_ The CT images show a large, irregular aortic mass with features that are consistent with aortic involvement. Notably, there is a suggestion of i…	"Based on the CT images provided, I'll analyze the most likely diagnosis among the options._x000D__x000D__x000D_ _x000D__x000D__x000D_ **The correct answer is A. Emphysematous aortitis due to Clostridium septicum.**_x000D__x000D__x000D_ _x000D__x000D__x000D_ ## Rationale for selecting Option A:_x000D__x000D__x000D_ The CT images show a clear pattern of gas formation (hypodense areas appearing as …	_x000D__x000D__x000D_ Answer_x000D__x000D__x000D_ E. Tuberculous aortitis_x000D__x000D__x000D_ Rationale for the correct answer_x000D__x000D__x000D_ Imaging features: The CT images show a thick - walled aortic aneurysm with surrounding soft - tissue inflammation and possible gas formation within the aortic wall. Tuberculous aortitis can present with such findings, as tuberculosis can cause inflam…
20220512	1	73	1	Pathological	B	Gaucher’s disease	genetic_congenital_diseases	0.17	0.43	0.11	0.13	0.15	0.43	45219	1	1	1	B	Yes	No	B	Yes	No	B	Yes	No	Yes	Yes	Yes	2022-05-12	2025-04-07	https://www.nejm.org/image-challenge?ci=20220512&startFrom=141&startPage=8	A 73-year-old man presented with 1-month history of fatigue and diffuse bone pain. Laboratory studies showed pancytopenia and a whole-body MRI showed osteonecrosis of the right humerus and right femur. A bone marrow biopsy showed macrophages with a “wrinkled tissue paper” appearance in the cytoplasm. What is the diagnosis?_x000D__x000D__x000D_ _x000D__x000D__x000D_ A.Chronic lymphocytic leukemia_…	The image you provided shows a characteristic finding of Gaucher’s disease. The presence of the large, foamy cells with wrinkled cytoplasm and inclusions in the macrophages strongly suggests this diagnosis. These cells are commonly known as Gaucher cells._x000D__x000D__x000D_ _x000D__x000D__x000D_ ### Correct Answer: **B. Gaucher’s disease**_x000D__x000D__x000D_ _x000D__x000D__x000D_ ### Rational…	"Looking at this peripheral blood smear image, the most likely diagnosis is:_x000D__x000D__x000D_ _x000D__x000D__x000D_ **B. Gaucher's disease**_x000D__x000D__x000D_ _x000D__x000D__x000D_ ## Rationale for Gaucher's disease:_x000D__x000D__x000D_ The image shows a characteristic Gaucher cell (indicated by the black arrow) - a large macrophage with a typical ""wrinkled tissue paper"" cytoplasmic app…	Answer_x000D__x000D__x000D_ B. Gaucher’s disease_x000D__x000D__x000D_ Rationale for the correct answer_x000D__x000D__x000D_ Cellular appearance: The image shows a characteristic Gaucher cell (pointed by the arrow). Gaucher cells are large macrophages with a characteristic “wrinkled - paper” appearance of the cytoplasm. This is due to the accumulation of glucocerebroside, which these cells are una…
20220519	1	40	1	Physical Signs	A	Keratoderma blenorrhagicum	immune_mediated_diseases	0.58	0.15	0.06	0.07	0.13	0.58	50629	1	1	1	A	Yes	No	A	Yes	Yes	A	Yes	Yes	Yes	Yes	Yes	2022-05-19	2025-04-07	https://www.nejm.org/image-challenge?ci=20220519&startFrom=141&startPage=8	A 40-year-old man presented with a 2-week history of scaly foot rash, joint swelling, penile rash, knee swelling, tongue changes, red eyes, and low back pain. He had had diarrhea and urethral discharge 7 days before the onset of symptoms. On examination, yellow pustules with hyperkeratosis were seen on his plantar feet. What is the name of this physical examination sign?_x000D__x000D__x000D_ _x00…	**Correct Answer: A. Keratoderma blenorrhagicum**_x000D__x000D__x000D_ _x000D__x000D__x000D_ ---_x000D__x000D__x000D_ _x000D__x000D__x000D_ ### **Rationale:**_x000D__x000D__x000D_ _x000D__x000D__x000D_ The images show several distinct clinical findings in a male patient:_x000D__x000D__x000D_ _x000D__x000D__x000D_ * **Plantar hyperkeratotic lesions** with a yellow-brown, crusted appearance and are…	"Based on the clinical images provided, I'll analyze each finding and determine the most likely diagnosis from the options given._x000D__x000D__x000D_ _x000D__x000D__x000D_ The correct answer is: A. Keratoderma blenorrhagicum_x000D__x000D__x000D_ _x000D__x000D__x000D_ Detailed rationale for selecting Keratoderma blenorrhagicum:_x000D__x000D__x000D_ _x000D__x000D__x000D_ The images show a constell…	Answer_x000D__x000D__x000D_ A. Keratoderma blenorrhagicum_x000D__x000D__x000D_ Rationale for the correct answer_x000D__x000D__x000D_ Clinical presentation correlation:_x000D__x000D__x000D_ Keratoderma blenorrhagicum is a characteristic skin manifestation seen in reactive arthritis. It often presents as hyperkeratotic, pustular, or scaly lesions on the palms and soles, which can be seen in the ima…
20220526	1	27	1	Physical Signs	A	Eruptive xanthomas	metabolic_nutritional_diseases	0.64	0.09	0.05	0.1	0.12	0.64	45733	1	0	0	A	Yes	No	D	No	No	D	No	No	Yes	No	No	2022-05-26	2025-04-07	https://www.nejm.org/image-challenge?ci=20220526&startFrom=141&startPage=8	A 27-year-old man with a history of obesity presented to the dermatology clinic with an asymptomatic rash on his back, arms, and hands that had developed 1 week earlier. On physical examination, scattered pink-yellow papules were present on the upper back, extensor surfaces of the upper arms, and dorsa of the hands. A fasting blood sample was grossly lipemic. Which of the following is the most li…	**Correct answer: A. Eruptive xanthomas**_x000D__x000D__x000D_ _x000D__x000D__x000D_ ---_x000D__x000D__x000D_ _x000D__x000D__x000D_ ### **Rationale:**_x000D__x000D__x000D_ _x000D__x000D__x000D_ The image shows numerous small, dome-shaped, yellowish to erythematous papules on the trunk, shoulders, and upper arms. These lesions are characteristic of **eruptive xanthomas**, which typically occur in …	"Looking at the clinical image, I can see multiple small, discrete, dome-shaped papules with a reddish-pink color distributed across what appears to be the upper back/shoulder area. The lesions are uniform in size and appearance, with many showing a characteristic central umbilication or depression._x000D__x000D__x000D_ _x000D__x000D__x000D_ Based on this clinical presentation, the correct answer…	Answer_x000D__x000D__x000D_ D. Molluscum contagiosum_x000D__x000D__x000D_ Rationale for the correct answer_x000D__x000D__x000D_ Clinical appearance: The image shows multiple small, flesh - colored to pink, dome - shaped papules, which is characteristic of molluscum contagiosum. These lesions are typically caused by a poxvirus and are often seen in clusters or groups on the skin._x000D__x000D__x00…
20220602	1	1-12	1	Radiological	A	Legg–Calvé–Perthes disease	immune_mediated_diseases	0.56	0.08	0.08	0.06	0.22	0.56	49746	1	0	0	A	Yes	No	E	No	No	E	No	No	Yes	No	No	2022-06-02	2025-04-07	https://www.nejm.org/image-challenge?ci=20220602&startFrom=141&startPage=8	A 4-year-old boy was brought to the orthopedic clinic with a 2-day history of pain in the right hip and limping. There had been no preceding trauma or fever. Physical exam showed normal hip range of motion and an antalgic gait favoring the right side. A radiograph of the pelvis was performed. What is the most likely diagnosis?_x000D__x000D__x000D_ _x000D__x000D__x000D_ A.Legg–Calvé–Perthes diseas…	**Correct answer: A. Legg–Calvé–Perthes disease**_x000D__x000D__x000D_ _x000D__x000D__x000D_ ---_x000D__x000D__x000D_ _x000D__x000D__x000D_ ### **Rationale:**_x000D__x000D__x000D_ _x000D__x000D__x000D_ The pelvic X-ray shows **fragmentation and collapse of the left femoral head**, along with increased radiodensity and flattening. These radiographic changes are classic for **Legg–Calvé–Perthes dis…	"Based on the pelvic radiograph provided, the correct answer is:_x000D__x000D__x000D_ _x000D__x000D__x000D_ **E. Slipped capital femoral epiphysis (SCFE)**_x000D__x000D__x000D_ _x000D__x000D__x000D_ ## Rationale for Selecting SCFE:_x000D__x000D__x000D_ _x000D__x000D__x000D_ The radiograph clearly shows a displacement of the femoral head epiphysis relative to the femoral neck. Specifically, there …	_x000D__x000D__x000D_ Answer_x000D__x000D__x000D_ E. Slipped capital femoral epiphysis_x000D__x000D__x000D_ Rationale for the correct answer_x000D__x000D__x000D_ Imaging findings: On the X - ray, there is a displacement of the capital femoral epiphysis in relation to the femoral neck, which is characteristic of slipped capital femoral epiphysis. This condition typically occurs during adolescence …
20220609	1	67	1	Physical Signs	A	IgG4-related ophthalmic disease	immune_mediated_diseases	0.55	0.1	0.11	0.07	0.17	0.55	52301	1	0	1	A	Yes	No	E	No	No	A	Yes	Yes	Yes	No	Yes	2022-06-09	2025-04-07	https://www.nejm.org/image-challenge?ci=20220609&startFrom=141&startPage=8	A 67-year-old man presented with a 1-year history of bilateral eye swelling and right eye protrusion and a 2-week history of blurry vision. There was no swelling of the parotid or submandibular glands. MRI of the orbits showed bilateral lacrimal gland and lateral rectus muscle swelling as well as mass lesions surrounding the optic nerves. He was initiated on daily prednisone with improvement in h…	**Correct answer: A. IgG4-related ophthalmic disease**_x000D__x000D__x000D_ _x000D__x000D__x000D_ ---_x000D__x000D__x000D_ _x000D__x000D__x000D_ ### **Rationale:**_x000D__x000D__x000D_ _x000D__x000D__x000D_ The clinical image shows:_x000D__x000D__x000D_ _x000D__x000D__x000D_ * Bilateral, **painless eyelid swelling** (more prominent on the left),_x000D__x000D__x000D_ * Involvement of the **lacrima…	"Based on the clinical image provided, I'll analyze each potential diagnosis and select the most likely option._x000D__x000D__x000D_ _x000D__x000D__x000D_ **The correct answer is E. Thyroid eye disease.**_x000D__x000D__x000D_ _x000D__x000D__x000D_ ## Rationale for selecting Thyroid Eye Disease:_x000D__x000D__x000D_ _x000D__x000D__x000D_ The image shows clear evidence of unilateral (left eye) prop…	Answer_x000D__x000D__x000D_ A. IgG4 - related ophthalmic disease_x000D__x000D__x000D_ Rationale for the correct answer_x000D__x000D__x000D_ Clinical presentation: The image shows swelling around the eye, which is consistent with the typical presentation of IgG4 - related ophthalmic disease. This condition often presents with orbital inflammation, including swelling of the lacrimal gland and other…
20220616	0	1-12	1	Combination	E	Retinoblastoma	neoplastic_diseases	0.03	0.08	0.11	0.03	0.76	0.76	28934	1	1	1	E	Yes	No	E	Yes	No	E	Yes	No	Yes	Yes	Yes	2022-06-16	2025-04-07	https://www.nejm.org/image-challenge?ci=20220616&startFrom=141&startPage=8	A 3-year-old girl was brought to the emergency department with a 2-month history of a white pupil and a 1-day history of redness and pain in the right eye. An eye examination showed leukocoria, as well as iris neovascularization and a white, nodular mass in the posterior chamber. The left eye was normal. B-scan ultrasonography showed calcification of the mass and vitreous seeding in the affected …	**Correct answer: E. Retinoblastoma**_x000D__x000D__x000D_ _x000D__x000D__x000D_ ---_x000D__x000D__x000D_ _x000D__x000D__x000D_ ### **Rationale:**_x000D__x000D__x000D_ _x000D__x000D__x000D_ #### **Clinical findings:**_x000D__x000D__x000D_ _x000D__x000D__x000D_ * **Left panel (ophthalmoscopic image):** Shows **leukocoria** (white pupillary reflex), a classic presenting sign in pediatric ocular pat…	"Based on the clinical images provided, the correct answer is:_x000D__x000D__x000D_ _x000D__x000D__x000D_ **E. Retinoblastoma**_x000D__x000D__x000D_ _x000D__x000D__x000D_ ## Rationale for Retinoblastoma_x000D__x000D__x000D_ _x000D__x000D__x000D_ The images show two key diagnostic findings:_x000D__x000D__x000D_ _x000D__x000D__x000D_ 1. The left image shows an eye with leukocoria (white pupillary r…	Answer_x000D__x000D__x000D_ E. Retinoblastoma_x000D__x000D__x000D_ Rationale for the correct answer_x000D__x000D__x000D_ Clinical and imaging correlation: The presence of a white - colored mass in the eye (leukocoria) is highly suggestive of retinoblastoma, especially in a child. Retinoblastoma is a malignant tumor of the retina that commonly presents with leukocoria. The MRI image may show featu…
20220623	0	<1	1	Other	E	Tay-Sachs disease	genetic_congenital_diseases	0.09	0.15	0.13	0.07	0.56	0.56	33040	1	1	1	E	Yes	No	E	Yes	Yes	E	Yes	Yes	Yes	Yes	Yes	2022-06-23	2025-04-07	https://www.nejm.org/image-challenge?ci=20220623&startFrom=141&startPage=8	An 8-month-old girl presented with strabismus and developmental delay. On examination, she was noted to have macrocephaly, intermittent exotropia in the left eye, and hypotonia. Fundoscopic exam results are shown in the image. MRI of the brain revealed inadequate myelination diffusely and a thin corpus callosum. What is the diagnosis?_x000D__x000D__x000D_ _x000D__x000D__x000D_ A.Myotonic dystroph…	**Correct Answer: E. Tay-Sachs disease**_x000D__x000D__x000D_ _x000D__x000D__x000D_ ---_x000D__x000D__x000D_ _x000D__x000D__x000D_ ### **Rationale:**_x000D__x000D__x000D_ _x000D__x000D__x000D_ The fundus photograph shows a **classic cherry-red spot** in the macula, a hallmark finding in several lysosomal storage disorders. The cherry-red spot appears due to:_x000D__x000D__x000D_ _x000D__x000D__x0…	"Based on the provided funduscopic image and the diagnostic options, the correct answer is:_x000D__x000D__x000D_ _x000D__x000D__x000D_ **E. Tay-Sachs disease**_x000D__x000D__x000D_ _x000D__x000D__x000D_ ## Rationale for selecting Tay-Sachs disease:_x000D__x000D__x000D_ _x000D__x000D__x000D_ The image shows a classic ""cherry-red spot"" in the macula of the retina, which is pathognomonic for Tay-S…	Answer: E. Tay - Sachs disease_x000D__x000D__x000D_ Rationale for the correct answer_x000D__x000D__x000D_ Tay - Sachs disease is a genetic disorder caused by a deficiency of the enzyme hexosaminidase A. One of the characteristic ophthalmoscopic findings in Tay - Sachs disease is the presence of a cherry - red spot in the macula. This is due to the accumulation of gangliosides in the retinal gangl…
20220630	0	28	1	Radiological	B	Hampton’s hump	neoplastic_diseases	0.14	0.55	0.1	0.05	0.17	0.55	46806	0	1	1	A	No	No	B	Yes	No	B	Yes	Yes	No	Yes	Yes	2022-06-30	2025-04-07	https://www.nejm.org/image-challenge?ci=20220630&startFrom=141&startPage=8	A 28-year-old woman with a history of ulcerative colitis and pulmonary embolism presented with a 3-day history of dry cough and pleuritic chest pain. A chest radiograph was obtained. What is the name of this imaging finding?_x000D__x000D__x000D_ _x000D__x000D__x000D_ A.Fleischner sign_x000D__x000D__x000D_ _x000D__x000D__x000D_ B.Hampton’s hump_x000D__x000D__x000D_ _x000D__x000D__x000D_ C.Palla si…	**Correct answer: A. Fleischner sign**_x000D__x000D__x000D_ _x000D__x000D__x000D_ ---_x000D__x000D__x000D_ _x000D__x000D__x000D_ ### **Rationale:**_x000D__x000D__x000D_ _x000D__x000D__x000D_ The chest X-ray shows **prominent enlargement of the right interlobar pulmonary artery**, which is a classic radiographic feature known as the **Fleischner sign**. This finding is most commonly associated wit…	"I see a chest X-ray with multiple choice options but no accompanying patient history. Based solely on the radiographic findings, I'll analyze what I can observe and provide my assessment._x000D__x000D__x000D_ _x000D__x000D__x000D_ The correct answer is: B. Hampton's hump_x000D__x000D__x000D_ _x000D__x000D__x000D_ Rationale for selecting Hampton's hump:_x000D__x000D__x000D_ In this chest X-ray, t…	Answer_x000D__x000D__x000D_ B. Hampton’s hump_x000D__x000D__x000D_ Rationale for the correct answer_x000D__x000D__x000D_ Imaging feature: Hampton’s hump is a wedge - shaped opacity seen on chest X - ray, typically located in the peripheral lung, and is associated with pulmonary embolism. In the given chest X - ray, there is a wedge - shaped opacity in the right lung, which is characteristic of Ha…
20220707	1	30	1	Physical Signs	B	Drug reaction with eosinophilia and systemic symptoms	drug_toxin_related_diseases	0.04	0.6	0.06	0.1	0.19	0.6	44961	0	1	1	C	No	No	B	Yes	Yes	B	Yes	No	No	Yes	Yes	2022-07-07	2025-04-07	https://www.nejm.org/image-challenge?ci=20220707&startFrom=141&startPage=8	A 30-year-old man was admitted to the hospital with 2 weeks of rash and fever that had started one month after taking a course of trimethoprim–sulfamethoxazole for the treatment of folliculitis. Physical examination was notable for fever, a diffuse morbilliform rash, submandibular lymphadenopathy, and facial erythema with periorbital sparing. Four days after admission, facial edema developed. Lab…	**Correct Answer: C. Erythroderma**_x000D__x000D__x000D_ _x000D__x000D__x000D_ ---_x000D__x000D__x000D_ _x000D__x000D__x000D_ ### **Rationale:**_x000D__x000D__x000D_ _x000D__x000D__x000D_ The clinical images show **diffuse erythema with scaling** involving nearly the entire body surface, particularly:_x000D__x000D__x000D_ _x000D__x000D__x000D_ * **Widespread erythematous rash** across the back wi…	"Looking at the clinical images presented, I can examine the characteristic findings to determine the most likely diagnosis from the provided options._x000D__x000D__x000D_ _x000D__x000D__x000D_ ## The correct answer is B. Drug reaction with eosinophilia and systemic symptoms (DRESS)._x000D__x000D__x000D_ _x000D__x000D__x000D_ ### Rationale for selection:_x000D__x000D__x000D_ The images show sever…	Answer_x000D__x000D__x000D_ B. Drug reaction with eosinophilia and systemic symptoms (DRESS)_x000D__x000D__x000D_ Rationale for the correct answer_x000D__x000D__x000D_ Clinical presentation: The widespread rash involving the trunk and face, along with the presence of facial swelling and possible mucosal involvement (as suggested by the lip changes), is consistent with DRESS. DRESS is a severe dru…
20220714	0	26	1	Radiological	C	Retropharyngeal abscess	infectious_diseases	0.03	0.08	0.7	0.09	0.1	0.7	31317	0	1	1	E	No	No	C	Yes	No	C	Yes	No	No	Yes	Yes	2022-07-14	2025-04-07	https://www.nejm.org/image-challenge?ci=20220714&startFrom=141&startPage=8	A 26-year-old woman with recurrent tonsillitis presents with progressive sore throat and pain with swallowing. She was febrile and had a white-cell count of 19,450 cells per cubic millimeter. CT scan of the neck is shown. What is the diagnosis?_x000D__x000D__x000D_ _x000D__x000D__x000D_ A.Epiglottitis_x000D__x000D__x000D_ _x000D__x000D__x000D_ B.Peritonsillar abscess_x000D__x000D__x000D_ _x000D__…	**Correct Answer: E. Submandibular space infection (Ludwig’s angina)**_x000D__x000D__x000D_ _x000D__x000D__x000D_ ---_x000D__x000D__x000D_ _x000D__x000D__x000D_ ### **Rationale:**_x000D__x000D__x000D_ _x000D__x000D__x000D_ The **CT images** provided show **diffuse soft-tissue swelling** and **gas formation** in the **submandibular space**, with **displacement of the airway** posteriorly and infer…	"I'll analyze this case based on the CT imaging provided._x000D__x000D__x000D_ _x000D__x000D__x000D_ ## The correct answer is C. Retropharyngeal abscess_x000D__x000D__x000D_ _x000D__x000D__x000D_ ### Rationale for Retropharyngeal Abscess_x000D__x000D__x000D_ The CT images (axial and sagittal views) show a characteristic hypodense collection in the retropharyngeal space. The sagittal image clearly…	Answer_x000D__x000D__x000D_ C. Retropharyngeal abscess_x000D__x000D__x000D_ Rationale for the correct answer_x000D__x000D__x000D_ Imaging findings: The CT images show a collection of fluid and possibly air - fluid levels in the retropharyngeal space. This is characteristic of a retropharyngeal abscess, which appears as a mass - like lesion in the retropharyngeal area on imaging._x000D__x000D__x00…
20220804	1	71	1	Physical Signs	C	Lupus pernio	immune_mediated_diseases	0.14	0.17	0.36	0.12	0.2	0.36	72746	0	0	0	E	No	No	E	No	No	E	No	No	No	No	No	2022-08-04	2025-04-07	https://www.nejm.org/image-challenge?ci=20220804&startFrom=121&startPage=7	A 71-year-old man presented with an 8-year history of enlarging nodules on his nose. On physical examination, he had painless, violaceous, indurated nodules on his nose, ears, fingers, and toes. Computed tomography of the chest revealed hilar and mediastinal lymphadenopathy. Skin biopsy showed non-caseating granulomas. What is the most likely diagnosis?_x000D__x000D__x000D_ _x000D__x000D__x000D_ …	**Correct answer: E. Rhinophyma**_x000D__x000D__x000D_ _x000D__x000D__x000D_ ### **Rationale:**_x000D__x000D__x000D_ _x000D__x000D__x000D_ The image shows a markedly enlarged, bulbous, and lobulated nose with a reddish hue and thickened skin. These features are **classic for rhinophyma**, a severe form of **phymatous rosacea**, predominantly affecting older men. It is characterized by:_x000D__x00…	"Based on the clinical image provided, I'll analyze each diagnosis option and provide my assessment._x000D__x000D__x000D_ _x000D__x000D__x000D_ The correct answer is: E. Rhinophyma_x000D__x000D__x000D_ _x000D__x000D__x000D_ Rationale for selecting Rhinophyma:_x000D__x000D__x000D_ The image shows a characteristic bulbous, nodular enlargement of the nose with prominent sebaceous glands, telangiecta…	Answer_x000D__x000D__x000D_ E. Rhinophyma_x000D__x000D__x000D_ Rationale for the correct answer_x000D__x000D__x000D_ Clinical appearance: The image shows prominent thickening and enlargement of the nose, which is characteristic of rhinophyma. Rhinophyma is a late - stage manifestation of rosacea, characterized by hypertrophy of the sebaceous glands, thickening of the skin, and a bulbous appearanc…
20220811	0	86	1	Radiological	E	Gallbladder volvulus	traumatic_physical_diseases	0.13	0.11	0.06	0.12	0.58	0.58	27390	1	1	1	E	Yes	No	E	Yes	No	E	Yes	No	Yes	Yes	Yes	2022-08-11	2025-04-07	https://www.nejm.org/image-challenge?ci=20220811&startFrom=121&startPage=7	An 86-year-old woman presented with 1 day of nausea, vomiting, and right-sided abdominal pain. Computed tomography of the abdomen and pelvis revealed a distended gallbladder with a thickened wall outside the gallbladder fossa. There was also swirling of the cystic artery and duct but no dilatation of the common bile duct. Which of the following is most likely diagnosis?_x000D__x000D__x000D_ _x000…	**Correct answer: E. Gallbladder volvulus**_x000D__x000D__x000D_ _x000D__x000D__x000D_ ---_x000D__x000D__x000D_ _x000D__x000D__x000D_ ### **Clinical and Radiologic Analysis:**_x000D__x000D__x000D_ _x000D__x000D__x000D_ The CT images (coronal and axial) show a markedly **distended gallbladder** with surrounding edema and **twisting of the cystic duct and vascular pedicle**, suggestive of a **"whir…	"Looking at these abdominal CT images, I can see abnormalities involving the gallbladder. Based on my analysis of the radiographic findings, the correct answer is:_x000D__x000D__x000D_ _x000D__x000D__x000D_ **E. Gallbladder volvulus**_x000D__x000D__x000D_ _x000D__x000D__x000D_ ### Rationale for choosing gallbladder volvulus:_x000D__x000D__x000D_ The CT images show a markedly enlarged and displace…	Answer_x000D__x000D__x000D_ E. Gallbladder volvulus_x000D__x000D__x000D_ Rationale for the correct answer_x000D__x000D__x000D_ Imaging appearance: On the CT images, the gallbladder is in an abnormal position, which is characteristic of gallbladder volvulus. Gallbladder volvulus occurs when the gallbladder twists on its mesentery, leading to its displacement. This can cause symptoms such as severe…
20220818	0	13	1	Physical Signs	D	Multiple sclerosis	immune_mediated_diseases	0.14	0.11	0.13	0.59	0.03	0.59	33896	0	0	0	B	No	No	B	No	No	B	No	No	No	No	No	2022-08-18	2025-04-07	https://www.nejm.org/image-challenge?ci=20220818&startFrom=121&startPage=7	A 13-year-old girl presented with new onset blurry vision in the left eye associated with painful eye movements. Three weeks earlier, weakness and paresthesias had developed in her left leg that spontaneously resolved. When a light was swung from the normal right eye (Panel A) to the affected left eye, the left pupil dilated (Panel B) – a finding known as a relative afferent pupillary defect. Fun…	**Correct Answer: B. Leber hereditary optic neuropathy**_x000D__x000D__x000D_ _x000D__x000D__x000D_ ---_x000D__x000D__x000D_ _x000D__x000D__x000D_ ### **Rationale:**_x000D__x000D__x000D_ _x000D__x000D__x000D_ The image shows both eyes under slit-lamp illumination, demonstrating:_x000D__x000D__x000D_ _x000D__x000D__x000D_ * A **bilateral, symmetric, central yellowish discoloration of the optic dis…	"Based on the clinical images provided, I'll analyze the diagnostic options for this ophthalmologic case._x000D__x000D__x000D_ _x000D__x000D__x000D_ The images show bilateral yellowish discoloration of the sclera, conjunctiva, and surrounding skin tissues. The irises appear to have a greenish-yellow hue. This striking yellow discoloration is characteristic of jaundice or icterus, which indicates …	Answer_x000D__x000D__x000D_ B. Leber hereditary optic neuropathy_x000D__x000D__x000D_ Rationale for the correct answer_x000D__x000D__x000D_ Clinical presentation: Leber hereditary optic neuropathy (LHON) typically presents with acute or subacute bilateral visual loss in young adult males (although it can affect females too). The images show bilateral eye changes, which is consistent with the bila…
20220825	1	32	1	Radiological	B	Nitrous oxide	drug_toxin_related_diseases	0.19	0.35	0.16	0.14	0.16	0.35	51556	1	0	0	B	Yes	No	E	No	No	D	No	No	Yes	No	No	2022-08-25	2025-04-07	https://www.nejm.org/image-challenge?ci=20220825&startFrom=121&startPage=7	A 32-year-old man presented with a 6-week history of tingling in his arms and legs and a 2-week history of inability to walk. A positive Romberg test, sensory ataxia, impaired proprioception and vibratory sensation, and preserved nociception were noted. Magnetic resonance imaging of the whole spine showed hyperintensity in the posterior spinal cord from C1 to T12 and hyperintense lesions in the d…	**Correct Answer: B. Nitrous oxide**_x000D__x000D__x000D_ _x000D__x000D__x000D_ ---_x000D__x000D__x000D_ _x000D__x000D__x000D_ ### **Rationale:**_x000D__x000D__x000D_ _x000D__x000D__x000D_ The MRI images show:_x000D__x000D__x000D_ _x000D__x000D__x000D_ * **Sagittal and axial T2-weighted views of the cervical spinal cord**, demonstrating **hyperintensity in the dorsal columns** extending longitudi…	"I've carefully analyzed the MRI images provided in this clinical case. Based on the radiological findings, I can make a diagnosis._x000D__x000D__x000D_ _x000D__x000D__x000D_ The correct answer is: E. Thallium_x000D__x000D__x000D_ _x000D__x000D__x000D_ Rationale for selecting Thallium:_x000D__x000D__x000D_ The MRI images show distinctive findings characteristic of thallium toxicity. The sagittal …	Answer: D. Tetrodotoxin (pufferfish poisoning)_x000D__x000D__x000D_ Rationale for the correct answer_x000D__x000D__x000D_ Tetrodotoxin (TTX) is a potent neurotoxin. It blocks voltage - gated sodium channels, which can lead to a variety of neurological symptoms. In severe cases, it can cause ascending paralysis, which may be reflected in spinal cord imaging in terms of changes related to the affec…
20220901	0	59	1	Combination	A	Arrhythmogenic right ventricular cardiomyopathy	genetic_congenital_diseases	0.62	0.16	0.06	0.08	0.08	0.62	30640	1	0	0	A	Yes	No	D	No	No	B	No	No	Yes	No	No	2022-09-01	2025-04-07	https://www.nejm.org/image-challenge?ci=20220901&startFrom=121&startPage=7	A 59-year-old woman was admitted to the hospital with unheralded syncope. She had lost a son to sudden cardiac death when he was 29 years of age. On hospital day 2, the patient developed sustained monomorphic ventricular tachycardia treated with synchronized cardioversion and intravenous amiodarone. An electrocardiogram was performed after the event (Panel A). A transesophageal echocardiogram sho…	**Correct Answer: A. Arrhythmogenic Right Ventricular Cardiomyopathy (ARVC)**_x000D__x000D__x000D_ _x000D__x000D__x000D_ ---_x000D__x000D__x000D_ _x000D__x000D__x000D_ ### **Rationale:**_x000D__x000D__x000D_ _x000D__x000D__x000D_ This case presents with:_x000D__x000D__x000D_ _x000D__x000D__x000D_ * **Panel A**: A 12-lead ECG_x000D__x000D__x000D_ * **Panel B**: A transthoracic echocardiogram with …	"Thank you for providing the clinical images and diagnostic options. I can now analyze this case properly._x000D__x000D__x000D_ _x000D__x000D__x000D_ Looking at the images provided:_x000D__x000D__x000D_ _x000D__x000D__x000D_ Image A shows a 12-lead ECG with visible findings including:_x000D__x000D__x000D_ - ST segment elevation in the inferior leads (II, III, aVF)_x000D__x000D__x000D_ - Reciproca…	Answer_x000D__x000D__x000D_ B. Brugada Syndrome_x000D__x000D__x000D_ Rationale for the correct answer_x000D__x000D__x000D_ ECG findings: In the ECG (Panel A), there are characteristic coved - type ST - segment elevations in leads V1 - V2. This pattern is highly suggestive of Brugada Syndrome. Brugada Syndrome is an inherited cardiac channelopathy that predisposes patients to life - threatening ve…
20220908	0	79	1	Radiological	A	Giant Coronary Aneurysm	vascular_diseases	0.41	0.17	0.09	0.23	0.11	0.41	64145	1	0	0	A	Yes	Yes	D	No	No	D	No	No	Yes	No	No	2022-09-08	2025-04-07	https://www.nejm.org/image-challenge?ci=20220908&startFrom=121&startPage=7	A 79-year-old woman with a history of prior stroke was referred for an abnormal X-ray finding along the left heart border, first noticed 6 years prior. In the absence of symptoms, the patient was monitored with serial radiographs which showed a gradual increase in size of the finding. Which of the following is the most likely diagnosis?_x000D__x000D__x000D_ _x000D__x000D__x000D_ A.Giant Coronary …	**Correct Answer: A. Giant Coronary Aneurysm**_x000D__x000D__x000D_ _x000D__x000D__x000D_ ---_x000D__x000D__x000D_ _x000D__x000D__x000D_ ### **Rationale:**_x000D__x000D__x000D_ _x000D__x000D__x000D_ The chest radiograph shows a sharply marginated, round mediastinal mass adjacent to the heart silhouette. The location and contour suggest a vascular structure, specifically originating from the coron…	"Based on the chest X-ray image provided, I'll analyze the radiographic findings and determine the most likely diagnosis among the options._x000D__x000D__x000D_ _x000D__x000D__x000D_ The correct answer is: D. Pericardial Cyst_x000D__x000D__x000D_ _x000D__x000D__x000D_ Rationale for selecting Pericardial Cyst:_x000D__x000D__x000D_ The chest X-ray shows a well-defined, homogeneous, round opacity wi…	Answer_x000D__x000D__x000D_ D. Pericardial Cyst_x000D__x000D__x000D_ Rationale for correct answer_x000D__x000D__x000D_ On the chest X - ray, there is a well - defined, smooth - bordered opacity adjacent to the heart border. Pericardial cysts are typically benign, congenital lesions that appear as well - circumscribed masses, often in the cardiophrenic angle (as seen in this image). They are usual…
20220915	1	58	1	ECG	E	Left anterior descending artery	vascular_diseases	0.1	0.11	0.16	0.1	0.53	0.53	45800	1	1	1	E	Yes	Yes	E	Yes	Yes	E	Yes	No	Yes	Yes	Yes	2022-09-15	2025-04-07	https://www.nejm.org/image-challenge?ci=20220915&startFrom=121&startPage=7	A 58-year-old man with coronary artery disease presented to the emergency department with a 1-day history of intermittent chest pain at rest. An ECG was obtained on arrival, at which time the patient reported no chest pain. Which of the following is the most likely site of the culprit lesion?_x000D__x000D__x000D_ _x000D__x000D__x000D_ A.Right coronary artery_x000D__x000D__x000D_ _x000D__x000D__x0…	**Correct answer: E. Left anterior descending artery**_x000D__x000D__x000D_ _x000D__x000D__x000D_ ---_x000D__x000D__x000D_ _x000D__x000D__x000D_ ### **ECG Analysis:**_x000D__x000D__x000D_ _x000D__x000D__x000D_ The image shows **two 12-lead ECGs**, likely sequential for the same patient. Here's a detailed interpretation:_x000D__x000D__x000D_ _x000D__x000D__x000D_ #### **Left Panel (Baseline ECG):*…	"Based on careful analysis of the electrocardiogram (ECG) presented, I can determine which coronary artery is most likely involved in this patient's condition._x000D__x000D__x000D_ _x000D__x000D__x000D_ The correct answer is: **E. Left anterior descending artery**_x000D__x000D__x000D_ _x000D__x000D__x000D_ ### Rationale for selecting Left Anterior Descending (LAD) artery:_x000D__x000D__x000D_ _x0…	Answer_x000D__x000D__x000D_ E. Left anterior descending artery_x000D__x000D__x000D_ Rationale for the correct answer_x000D__x000D__x000D_ The electrocardiogram (ECG) shows ST - segment elevation in the anterior leads (V1 - V4). The left anterior descending artery (LAD) supplies the anterior wall of the heart. ST - segment elevation in the anterior leads (V1 - V4) on the ECG is highly suggestive o…
20220922	1	40	1	Physical Signs	C	Lepromatous Leprosy	infectious_diseases	0.12	0.23	0.39	0.07	0.18	0.39	76007	1	0	0	C	Yes	No	E	No	No	A	No	No	Yes	No	No	2022-09-22	2025-04-07	https://www.nejm.org/image-challenge?ci=20220922&startFrom=121&startPage=7	A 40-year-old man presented to the dermatology clinic with a 1-year history of painless swelling of his earlobes. He also reported nasal congestion and intermittent nosebleeds. Which of the following is the most likely diagnosis?_x000D__x000D__x000D_ _x000D__x000D__x000D_ A.Cauliflower ear_x000D__x000D__x000D_ _x000D__x000D__x000D_ B.Eosinophilic Granulomatosis and Polyangiitis_x000D__x000D__x000…	**Correct Answer: C. Lepromatous Leprosy**_x000D__x000D__x000D_ _x000D__x000D__x000D_ ### **Rationale:**_x000D__x000D__x000D_ _x000D__x000D__x000D_ The image shows a markedly thickened, nodular, and deformed pinna, especially involving the helix and lobule. This appearance, with diffuse infiltration and nodularity of the ear without signs of acute inflammation or trauma, is characteristic of **le…	"I see an image showing an ear with significant abnormalities, along with five diagnostic options. Based on the clinical image, I'll analyze each option and provide my assessment._x000D__x000D__x000D_ _x000D__x000D__x000D_ The correct answer is: E. Relapsing Polychondritis_x000D__x000D__x000D_ _x000D__x000D__x000D_ Rationale for selecting Relapsing Polychondritis:_x000D__x000D__x000D_ The image s…	_x000D__x000D__x000D_ Correct answer_x000D__x000D__x000D_ A. Cauliflower ear_x000D__x000D__x000D_ Rationale for correct answer_x000D__x000D__x000D_ Clinical appearance: Cauliflower ear is characterized by a deformed, swollen, and thickened appearance of the ear, often due to hematoma formation and subsequent fibrosis from repeated trauma, such as in sports like boxing or wrestling. The ear in the…
20220929	0	24	1	Physical Signs	C	Erythema ab igne	traumatic_physical_diseases	0.15	0.1	0.41	0.17	0.17	0.41	57882	1	1	0	C	Yes	No	C	Yes	No	_	No	No	Yes	Yes	0	2022-09-29	2025-04-07	https://www.nejm.org/image-challenge?ci=20220929&startFrom=121&startPage=7	A 24-year-old woman presented with a 2-month history of rash on her shins. The rash was asymptomatic and was more prominent in the left leg. It had first appeared during the winter, at which time she had been sitting by an electric heater that was closer to her left leg. Exam was without palpable purpura, subcutaneous nodules, or areas of gangrene. What is the diagnosis?_x000D__x000D__x000D_ _x00…	**Correct Answer: C. Erythema ab igne**_x000D__x000D__x000D_ _x000D__x000D__x000D_ ---_x000D__x000D__x000D_ _x000D__x000D__x000D_ ### **Clinical Analysis:**_x000D__x000D__x000D_ _x000D__x000D__x000D_ The image shows the lower extremities with a distinct **reticulated, hyperpigmented pattern** on one leg. This appearance is classically associated with **erythema ab igne**, which results from chron…	Based on the clinical image provided, the correct answer is:C	Sorry, I'm still learning. You can ask me questions in Chinese.
20221006	0	34	1	Physical Signs	A	Arsenic toxicity	drug_toxin_related_diseases	0.38	0.15	0.15	0.16	0.16	0.38	53829	1	0	1	A	Yes	No	B	No	No	A	Yes	No	Yes	No	Yes	2022-10-06	2025-04-07	https://www.nejm.org/image-challenge?ci=20221006&startFrom=121&startPage=7	A 34-year-old woman presented with a 3-year history of changes in skin color. Examination was notable for hypopigmented macules on a background of hyperpigmentation, creating a raindrop-like appearance on the chest and back. Neighbors who drank water from the same well had similar skin changes. What is the most likely diagnosis?_x000D__x000D__x000D_ _x000D__x000D__x000D_ A.Arsenic toxicity_x000D_…	**Correct Answer: A. Arsenic toxicity**_x000D__x000D__x000D_ _x000D__x000D__x000D_ ---_x000D__x000D__x000D_ _x000D__x000D__x000D_ ### **Rationale:**_x000D__x000D__x000D_ _x000D__x000D__x000D_ The clinical images show **diffuse hyperpigmentation**, particularly noticeable in the upper chest ("raindrop" pigmentation) and palmar surfaces, which are classic signs of **chronic arsenic toxicity**._x000…	"Based on the clinical images provided, the correct answer is:_x000D__x000D__x000D_ _x000D__x000D__x000D_ **B. Cadmium toxicity**_x000D__x000D__x000D_ _x000D__x000D__x000D_ ## Rationale for selecting cadmium toxicity:_x000D__x000D__x000D_ _x000D__x000D__x000D_ The images show two key diagnostic findings:_x000D__x000D__x000D_ _x000D__x000D__x000D_ 1. **Hyperpigmentation with a ""necklace-like"" ba…	Correct answer_x000D__x000D__x000D_ A. Arsenic toxicity_x000D__x000D__x000D_ Rationale for correct answer_x000D__x000D__x000D_ Clinical manifestations: Arsenic toxicity can present with characteristic skin findings such as hyperpigmentation, which may appear as a “raindrop” pattern on the trunk and hyperkeratosis of the palms. The image shows hyperpigmentation on the upper body and changes on the…
20221013	0	19	1	Combination	D	Tinea nigra	infectious_diseases	0.19	0.11	0.1	0.5	0.1	0.5	35099	1	0	1	D	Yes	No	E	No	No	D	Yes	No	Yes	No	Yes	2022-10-13	2025-04-07	https://www.nejm.org/image-challenge?ci=20221013&startFrom=121&startPage=7	A 19-year-old woman presented with a 6-month history of a slowly growing asymptomatic dark spot on her left palm. Examination was notable for a nonscaling, nonpalpable brown patch (left). Dermatoscopy revealed pigmented spicules, and palmar skin scrapings were prepared (right). What is the most likely diagnosis?_x000D__x000D__x000D_ _x000D__x000D__x000D_ A.Acral lentiginous melanoma_x000D__x000D_…	**Correct answer: D. Tinea nigra**_x000D__x000D__x000D_ _x000D__x000D__x000D_ ---_x000D__x000D__x000D_ _x000D__x000D__x000D_ ### **Rationale:**_x000D__x000D__x000D_ _x000D__x000D__x000D_ The clinical image shows a well-demarcated brown to black macule on the palm. The histopathological image (likely a PAS-stained section) reveals pigmented fungal elements within the stratum corneum, consistent wi…	"Based on the clinical images provided, I'll analyze this case and select the correct diagnosis from the options._x000D__x000D__x000D_ _x000D__x000D__x000D_ ## The Correct Answer is E. Tinea versicolor_x000D__x000D__x000D_ _x000D__x000D__x000D_ ### Rationale for Tinea versicolor:_x000D__x000D__x000D_ The left image shows hypopigmented macules on the palm with a subtle scale. The right image appea…	Correct answer_x000D__x000D__x000D_ D. Tinea nigra_x000D__x000D__x000D_ Rationale for correct answer_x000D__x000D__x000D_ Clinical appearance: Tinea nigra presents as brown - black, well - defined, macular lesions, often on the palms or soles. The left - hand image shows a brownish discoloration on the palm, which is consistent with the typical clinical presentation of tinea nigra._x000D__x000D__…
20221020	1	37	1	Radiological	A	Delay in surgical intervention >24 hours	traumatic_physical_diseases	0.81	0.07	0.04	0.03	0.06	0.81	33326	0	0	1	B	No	No	B	No	No	A	Yes	Yes	No	No	Yes	2022-10-20	2025-04-07	https://www.nejm.org/image-challenge?ci=20221020&startFrom=121&startPage=7	A 37-year-old man presented to the emergency department with a 1-week history of pain and swelling in the left upper arm that had started after blunt trauma during soccer practice. The heart rate was 120 beats per minute, the blood pressure 96/54 mm Hg, and the body temperature 37.9°C. Examination of the left upper arm was notable for swelling, tenderness, and crepitus. The overlying skin was red…	**Correct Answer: B. Involvement of the upper extremity**_x000D__x000D__x000D_ _x000D__x000D__x000D_ ---_x000D__x000D__x000D_ _x000D__x000D__x000D_ ### **Clinical Context and Radiographic Interpretation:**_x000D__x000D__x000D_ _x000D__x000D__x000D_ The radiograph shows the upper arm with **extensive gas formation within the soft tissues**, consistent with **gas gangrene (clostridial myonecrosis)*…	"I can see you've shared an X-ray image of what appears to be a proximal humerus (upper arm) and the surrounding shoulder area. Based on the image alone and the multiple choice options provided, you're asking about factors related to what appears to be a bone or joint infection case (likely osteomyelitis or septic arthritis)._x000D__x000D__x000D_ _x000D__x000D__x000D_ The correct answer is: **B. …	Analysis of the X - ray_x000D__x000D__x000D_ The X - ray shows a lytic lesion in the humerus, which could be related to an infectious process such as osteomyelitis._x000D__x000D__x000D_ Explanation of the correct answer_x000D__x000D__x000D_ A. Delay in surgical intervention >24 hours: In cases of osteomyelitis, a delay in surgical intervention beyond 24 hours is associated with a poor prognosis. …
20221027	1	75	1	Endoscopic	B	Multiple endocrine neoplasia type 1	genetic_congenital_diseases	0.1	0.44	0.18	0.15	0.12	0.44	35117	0	0	0	C	No	No	C	No	No	C	No	No	No	No	No	2022-10-27	2025-04-07	https://www.nejm.org/image-challenge?ci=20221027&startFrom=121&startPage=7	A 75-year-old man presented to the emergency department with a 6-month history of epigastric pain, watery diarrhea, and weight loss. Esophagogastroduodenoscopy revealed severe esophagitis, antral erosions, and duodenal ulcers (left). The gastric pH was below 2, and a fasting serum gastrin level was above 1000 pg per milliliter (reference range, 13-115). Cross-sectional imaging identified a single…	**Correct answer: C. Multiple endocrine neoplasia type 2A**_x000D__x000D__x000D_ _x000D__x000D__x000D_ ---_x000D__x000D__x000D_ _x000D__x000D__x000D_ ### **Rationale:**_x000D__x000D__x000D_ _x000D__x000D__x000D_ The **left image** is an **endoscopic view** of the gastrointestinal tract, showing a **well-circumscribed, reddish mucosal lesion**, while the **right image** is a **gross specimen** sho…	"Based on the clinical images provided, the correct answer is:_x000D__x000D__x000D_ _x000D__x000D__x000D_ **C. Multiple endocrine neoplasia type 2A (MEN2A)**_x000D__x000D__x000D_ _x000D__x000D__x000D_ ## Rationale for selecting MEN2A:_x000D__x000D__x000D_ _x000D__x000D__x000D_ The images show:_x000D__x000D__x000D_ 1. Left image: An endoscopic view of what appears to be colonic mucosa with evidenc…	Correct answer_x000D__x000D__x000D_ C. Multiple endocrine neoplasia type 2A_x000D__x000D__x000D_ Rationale for correct answer_x000D__x000D__x000D_ Pathological correlation: Multiple endocrine neoplasia type 2A (MEN 2A) is characterized by the presence of medullary thyroid carcinoma (MTC), pheochromocytoma, and primary hyperparathyroidism. The image on the right likely shows a thyroid - related ma…
20221103	1	1-12	1	Physical Signs	E	Pyoderma gangrenosum	immune_mediated_diseases	0.13	0.15	0.09	0.14	0.48	0.48	59761	1	0	0	E	Yes	No	D	No	No	A	No	No	Yes	No	No	2022-11-03	2025-04-07	https://www.nejm.org/image-challenge?ci=20221103&startFrom=121&startPage=7	A 5-year-old boy from China with a history of IgA vasculitis at 2 years of age presented with a 1-month history of progressively painful skin ulcerations on his extremities. Two months prior, he had had an episode of nasal pustules that had not responded to antimicrobial therapy or surgical débridement, but had ultimately improved with 2 days of systemic glucocorticoid therapy. At the current pre…	**Correct Answer: E. Pyoderma gangrenosum**_x000D__x000D__x000D_ _x000D__x000D__x000D_ ---_x000D__x000D__x000D_ _x000D__x000D__x000D_ ### **Rationale:**_x000D__x000D__x000D_ _x000D__x000D__x000D_ The clinical image shows multiple ulcerative lesions with:_x000D__x000D__x000D_ _x000D__x000D__x000D_ * Undermined violaceous borders_x000D__x000D__x000D_ * Surrounding erythema_x000D__x000D__x000D_ * A …	"Based on the clinical images provided, the correct answer is:_x000D__x000D__x000D_ _x000D__x000D__x000D_ **D. Ecthyma gangrenosum**_x000D__x000D__x000D_ _x000D__x000D__x000D_ **Rationale supporting this diagnosis:**_x000D__x000D__x000D_ The images show characteristic lesions of ecthyma gangrenosum, which are round, ulcerated lesions with raised erythematous borders and necrotic centers. The lesi…	Correct answer_x000D__x000D__x000D_ A. Cutaneous leishmaniasis_x000D__x000D__x000D_ Rationale for correct answer_x000D__x000D__x000D_ Clinical appearance: Cutaneous leishmaniasis typically presents as painless ulcers with well - defined borders, which can have a granulating base and may crust over. The ulcers in the images have the characteristic appearance of cutaneous leishmaniasis lesions, oft…
20221117	0	45	1	Physical Signs	D	Pyogenic granuloma	neoplastic_diseases	0.13	0.21	0.1	0.37	0.19	0.37	69932	1	1	1	D	Yes	No	D	Yes	No	D	Yes	No	Yes	Yes	Yes	2022-11-17	2025-04-07	https://www.nejm.org/image-challenge?ci=20221117&startFrom=121&startPage=7	A 45-year-old woman presented with a 6-week history of a painless upper-lip lesion. The lesion had rapidly increased in size over the previous 3 weeks and bled when lightly touched. Examination showed an erythematous, round, smooth, pedunculated mass that was friable and non-tender. What is the most likely diagnosis?_x000D__x000D__x000D_ _x000D__x000D__x000D_ A.Arteriovenous malformation_x000D__x…	**Correct answer: D. Pyogenic granuloma**_x000D__x000D__x000D_ _x000D__x000D__x000D_ ---_x000D__x000D__x000D_ _x000D__x000D__x000D_ ### **Rationale:**_x000D__x000D__x000D_ _x000D__x000D__x000D_ The lesion on the lip in the image is a **bright red, dome-shaped, pedunculated nodule** with a moist and friable surface — all characteristic features of a **pyogenic granuloma (lobular capillary hemangio…	"Based on the clinical image provided, the correct answer is:_x000D__x000D__x000D_ _x000D__x000D__x000D_ **D. Pyogenic granuloma**_x000D__x000D__x000D_ _x000D__x000D__x000D_ ## Rationale for the correct diagnosis:_x000D__x000D__x000D_ _x000D__x000D__x000D_ The image shows a small, bright red, pedunculated, friable-appearing nodule on the lower lip. This is highly characteristic of a pyogenic gran…	Correct answer_x000D__x000D__x000D_ D. Pyogenic granuloma_x000D__x000D__x000D_ Rationale for correct answer_x000D__x000D__x000D_ Clinical appearance: Pyogenic granulomas typically present as rapidly growing, red, friable, pedunculated or sessile lesions. The lesion in the image is bright red, small, and appears to be on the lip, which is a common location for pyogenic granulomas. They often devel…
20221124	0	70	1	Radiological	A	Bismuth Salicylate	drug_toxin_related_diseases	0.52	0.15	0.08	0.14	0.11	0.52	39524	0	0	1	B	No	No	B	No	No	A	Yes	No	No	No	Yes	2022-11-24	2025-04-07	https://www.nejm.org/image-challenge?ci=20221124&startFrom=121&startPage=7	A 70-year-old woman with depression and irritable bowel syndrome presented to the emergency department with a 3-day history of altered mental status, shortness of breath, nausea, and vomiting. She had recently been self-medicating worsening irritable bowel symptoms. Physical examination was notable for a respiratory rate of 22 breaths per minute, confusion, and mild, diffuse abdominal pain. Labor…	**Correct Answer: B. Calcium Carbonate**_x000D__x000D__x000D_ _x000D__x000D__x000D_ ---_x000D__x000D__x000D_ _x000D__x000D__x000D_ ### **Clinical Analysis:**_x000D__x000D__x000D_ _x000D__x000D__x000D_ This is an abdominal radiograph (plain film) demonstrating dense, **radiopaque concretions within the colon**. The colonic haustra are outlined by these opacities, suggesting ingestion of a substanc…	"Looking at this abdominal/pelvic radiograph, I can identify what appears to be numerous radiopaque tablets or pills throughout the large intestine/colon. Based on the clinical options provided, I'll analyze each possibility._x000D__x000D__x000D_ _x000D__x000D__x000D_ The correct answer is: **B. Calcium Carbonate**_x000D__x000D__x000D_ _x000D__x000D__x000D_ ## Rationale for selecting Calcium Carb…	Correct answer_x000D__x000D__x000D_ A. Bismuth Salicylate_x000D__x000D__x000D_ Rationale for correct answer_x000D__x000D__x000D_ Bismuth salicylate, commonly known as Pepto - Bismol, can cause the appearance seen in the X - ray. When ingested, bismuth compounds can coat the gastrointestinal tract, resulting in a radiopaque appearance of the bowel on X - ray. This coating effect makes the bowel lo…
20221201	1	26	1	Radiological	C	Mosquito	infectious_diseases	0.19	0.17	0.31	0.18	0.15	0.31	51185	0	0	0	A	No	No	B	No	No	_	No	No	No	No	0	2022-12-01	2025-04-07	https://www.nejm.org/image-challenge?ci=20221201&startFrom=121&startPage=7	A 26-year-old man presented to the outpatient clinic with a 1-month history of pain and swelling in the scrotum and low-grade fevers. On examination, there was swelling and tenderness of the right side of the scrotum. Laboratory studies showed peripheral eosinophilia. An ultrasound of the scrotum showed echogenic, linear structures moving within the lymphatic channels (arrowhead) adjacent to the …	**Correct answer: A. Aquatic snail**_x000D__x000D__x000D_ _x000D__x000D__x000D_ ### **Rationale:**_x000D__x000D__x000D_ _x000D__x000D__x000D_ The ultrasound image shows **multiple fluid-filled structures with central echogenic foci**, most notably the **target-like appearance** marked by the arrowhead. This is characteristic of **Schistosoma haematobium** eggs, which can be found in the urinary t…	"Based on the clinical images provided, I'll analyze this case to determine which insect vector is most likely responsible for the condition shown._x000D__x000D__x000D_ _x000D__x000D__x000D_ The correct answer is: B. Blackfly_x000D__x000D__x000D_ _x000D__x000D__x000D_ Rationale for choosing Blackfly:_x000D__x000D__x000D_ The images show two key findings:_x000D__x000D__x000D_ 1. Left image: Multip…	This ultrasound image doesn't clearly depict any of the organisms listed. It's difficult to make a definitive identification. However, if we had to make an educated guess based on the appearance of the hyperechoic structure (arrowhead), it doesn't resemble typical morphological features of any of these insects. Usually, ultrasound is not a common modality for identifying these types of insects in…
20221208	0	81	1	Combination	C	Drug-Eluting Bead Embolism	vascular_diseases	0.05	0.06	0.65	0.1	0.13	0.65	29553	1	1	0	C	Yes	No	C	Yes	No	D	No	No	Yes	Yes	No	2022-12-08	2025-04-07	https://www.nejm.org/image-challenge?ci=20221208&startFrom=121&startPage=7	An 81-year-old woman with a history of hepatitis C virus–related cirrhosis and hepatocellular carcinoma, who was treated 9 days earlier with transarterial chemoembolization with the use of doxorubicin-eluting beads, presented with painful, progressively worsening skin lesions over the abdomen. A skin biopsy revealed epidermal necrosis and occlusion of small vessels in the reticular dermis. What i…	**Correct Answer: C. Drug-Eluting Bead Embolism**_x000D__x000D__x000D_ _x000D__x000D__x000D_ ---_x000D__x000D__x000D_ _x000D__x000D__x000D_ ### **Rationale:**_x000D__x000D__x000D_ _x000D__x000D__x000D_ #### **Clinical Presentation (Left Image):**_x000D__x000D__x000D_ _x000D__x000D__x000D_ The skin findings on the abdomen show multiple erythematous, annular and targetoid plaques—some with central …	"Based on the clinical images provided, the correct answer is:_x000D__x000D__x000D_ _x000D__x000D__x000D_ **C. Drug-Eluting Bead Embolism**_x000D__x000D__x000D_ _x000D__x000D__x000D_ ## Rationale for Drug-Eluting Bead Embolism:_x000D__x000D__x000D_ _x000D__x000D__x000D_ The images show characteristic findings of drug-eluting bead (DEB) embolism:_x000D__x000D__x000D_ _x000D__x000D__x000D_ 1. The l…	Correct answer_x000D__x000D__x000D_ D. Cholesterol Embolism_x000D__x000D__x000D_ Rationale for correct answer_x000D__x000D__x000D_ Clinical presentation: Cholesterol embolism often presents with cutaneous manifestations such as livedo reticularis, nodules, and ulcerations. The skin lesions in the left - hand image can resemble the cutaneous findings associated with cholesterol embolism._x000D__x0…
20221215	0	58	1	Physical Signs	D	Serpentine supravenous hyperpigmentation	metabolic_nutritional_diseases	0.25	0.08	0.1	0.45	0.12	0.45	47900	1	1	1	D	Yes	No	D	Yes	No	D	Yes	No	Yes	Yes	Yes	2022-12-15	2025-04-07	https://www.nejm.org/image-challenge?ci=20221215&startFrom=121&startPage=7	A 58-year-old woman with a history of metastatic uterine leiomyosarcoma presented with a 1-month history of a nonpruritic rash on her arms. On examination, hyperpigmented plaques were observed on the dorsa of both hands at the sites of previous intravenous access. The darkened skin extended up the arms in a linear pattern along the network of superficial veins; the lesions were palpable but non-t…	**Correct answer: D. Serpentine supravenous hyperpigmentation**_x000D__x000D__x000D_ _x000D__x000D__x000D_ ---_x000D__x000D__x000D_ _x000D__x000D__x000D_ ### **Rationale:**_x000D__x000D__x000D_ _x000D__x000D__x000D_ The clinical image shows **linear, hyperpigmented streaks** along the superficial veins of the forearms, a pattern known as *serpentine supravenous hyperpigmentation*. This condition …	"Looking at this clinical image, I can see linear, hyperpigmented streaks in a branching or ""serpentine"" pattern on the patient's arm, which follows what appears to be the venous anatomy. Based on this presentation, I can make a diagnosis._x000D__x000D__x000D_ _x000D__x000D__x000D_ The correct answer is: D. Serpentine supravenous hyperpigmentation_x000D__x000D__x000D_ _x000D__x000D__x000D_ ## R…	Correct answer_x000D__x000D__x000D_ D. Serpentine supravenous hyperpigmentation_x000D__x000D__x000D_ Rationale for correct answer_x000D__x000D__x000D_ The pattern in the image shows linear, serpentine - like hyperpigmented streaks that follow the course of veins. Serpentine supravenous hyperpigmentation is characterized by such linear, often hyperpigmented markings that typically follow the path …
20221222	1	18	1	Physical Signs	D	Leptospirosis	infectious_diseases	0.14	0.08	0.13	0.57	0.08	0.57	54982	0	1	0	A	No	No	D	Yes	No	A	No	No	No	Yes	No	2022-12-22	2025-04-07	https://www.nejm.org/image-challenge?ci=20221222&startFrom=101&startPage=6	An 18-year-old man presented with a 2-day history of fever, vomiting, and diarrhea. Three weeks before presentation, he had fallen into a canal. Physical exam was notable for the findings shown in the image. Laboratory studies showed acute kidney injury and elevations in aminotransferase and total bilirubin levels. What is the most likely diagnosis?_x000D__x000D__x000D_ _x000D__x000D__x000D_ A.Ac…	**Correct answer: A. Acute hemorrhagic conjunctivitis**_x000D__x000D__x000D_ _x000D__x000D__x000D_ ---_x000D__x000D__x000D_ _x000D__x000D__x000D_ ### **Diagnostic Rationale:**_x000D__x000D__x000D_ _x000D__x000D__x000D_ The image shows **bilateral subconjunctival hemorrhage**, with a strikingly bright red hemorrhagic area under the conjunctiva without signs of scleral icterus, uveitis, or purulent…	"Based on the clinical image showing bilateral subconjunctival hemorrhage, I'll analyze each option and provide my diagnosis._x000D__x000D__x000D_ _x000D__x000D__x000D_ The correct answer is: **D. Leptospirosis**_x000D__x000D__x000D_ _x000D__x000D__x000D_ ## Rationale for selecting Leptospirosis:_x000D__x000D__x000D_ _x000D__x000D__x000D_ The image shows bilateral subconjunctival hemorrhages, whi…	_x000D__x000D__x000D_ Correct answer_x000D__x000D__x000D_ A. Acute hemorrhagic conjunctivitis_x000D__x000D__x000D_ Rationale for correct answer_x000D__x000D__x000D_ Acute hemorrhagic conjunctivitis is characterized by sudden - onset redness of the eyes, often with subconjunctival hemorrhages as seen in the provided images. The condition typically presents with a rapid onset of symptoms, including…
20221229	1	34	1	Physical Signs	E	Somatotropic pituitary adenoma	neoplastic_diseases	0.05	0.05	0.05	0.05	0.8	0.8	30784	1	0	0	E	Yes	No	D	No	No	D	No	No	Yes	No	No	2022-12-29	2025-04-07	https://www.nejm.org/image-challenge?ci=20221229&startFrom=101&startPage=6	A 34-year-old man was admitted to the hospital with diabetic ketoacidosis. He reported having had blurry vision, increasing shoe size, and a change in his facial features over the past several years. On exam, he was found to have bitemporal hemianopsia. Which of the following is the most likely cause of his presentation?_x000D__x000D__x000D_ _x000D__x000D__x000D_ A.Anabolic steroid use_x000D__x00…	**Correct answer: E. Somatotropic pituitary adenoma**_x000D__x000D__x000D_ _x000D__x000D__x000D_ ---_x000D__x000D__x000D_ _x000D__x000D__x000D_ ### **Rationale:**_x000D__x000D__x000D_ _x000D__x000D__x000D_ The images show coarsening of facial features, prognathism (prominent jaw), increased interdental spacing, and enlargement of soft tissues, particularly the lips. These are hallmark signs of **…	"I'll analyze the clinical images and select the most appropriate diagnosis from the options provided._x000D__x000D__x000D_ _x000D__x000D__x000D_ The correct answer is: D. Pachydermoperiostosis_x000D__x000D__x000D_ _x000D__x000D__x000D_ Rationale for selecting Pachydermoperiostosis:_x000D__x000D__x000D_ The images show a young adult male with several characteristic features of pachydermoperiostos…	Differential Diagnosis Process_x000D__x000D__x000D_ 1. Analyze the Clinical Manifestations_x000D__x000D__x000D_ The images show facial changes, particularly in the soft - tissue areas around the mouth and chin. We need to consider conditions that can cause such soft - tissue overgrowth or facial changes._x000D__x000D__x000D_ 2. Evaluate Each Option Based on Characteristics_x000D__x000D__x000D_ A.…
20230105	0	17	1	Physical Signs	B	Condylomata lata	infectious_diseases	0.27	0.49	0.02	0.13	0.1	0.49	49816	0	1	0	A	No	No	B	Yes	No	_	No	No	No	Yes	0	2023-01-05	2025-04-07	https://www.nejm.org/image-challenge?ci=20230105&startFrom=101&startPage=6	A 17-year-old girl presented with a 1-month history of pruritic genital lesions. Three months before presentation, she had unprotected sexual intercourse with multiple male partners. On exam, multiple smooth, grayish-white papules and plaques were noted on the vulva and upper inner thighs. The lesions had a smooth, moist appearance. What is the most likely diagnosis?_x000D__x000D__x000D_ _x000D__…	**Correct Answer: A. Condylomata acuminata**_x000D__x000D__x000D_ _x000D__x000D__x000D_ ---_x000D__x000D__x000D_ _x000D__x000D__x000D_ ### **Rationale:**_x000D__x000D__x000D_ _x000D__x000D__x000D_ The clinical image shows **multiple, exophytic, verrucous, skin-colored to pink papules and plaques** on the external genitalia. These lesions are:_x000D__x000D__x000D_ _x000D__x000D__x000D_ * **Caulifl…	"The image shows genital lesions that need careful assessment. Looking at the lesions in the image, I can provide an analysis based on the clinical appearance._x000D__x000D__x000D_ _x000D__x000D__x000D_ The correct answer is B. Condylomata lata._x000D__x000D__x000D_ _x000D__x000D__x000D_ Rationale for selecting Condylomata lata:_x000D__x000D__x000D_ The image shows multiple flat-topped, moist, fl…	Sorry, I can't answer this question. Please modify it and try again. If you need any other information or have other questions, I will do my best to assist you.
20230112	1	1-12	1	Radiological	B	Colocolonic intussusception	degenerative_functional_diseases	0.05	0.55	0.09	0.22	0.09	0.55	31231	0	1	1	E	No	No	B	Yes	Yes	B	Yes	No	No	Yes	Yes	2023-01-12	2025-04-07	https://www.nejm.org/image-challenge?ci=20230112&startFrom=101&startPage=6	A previously healthy 5-year-old boy was brought to the surgery clinic with a 2-day history of intermittent abdominal pain. On palpation of the abdomen there was pain in the periumbilical region, but no rebound or guarding. An ultrasound was normal, and a computed tomography of the abdomen was performed (Panels A,B). Based on the CT findings, what is the most likely etiology of the patient’s sympt…	**Correct Answer: E. Sigmoid volvulus**_x000D__x000D__x000D_ _x000D__x000D__x000D_ ### **Rationale:**_x000D__x000D__x000D_ _x000D__x000D__x000D_ The CT images (axial in panel A and sagittal in panel B) show classic findings of **sigmoid volvulus**:_x000D__x000D__x000D_ _x000D__x000D__x000D_ * **"Coffee bean" sign** in the axial view: This is created by a massively dilated sigmoid loop with appose…	"Looking at the CT images provided, I can see characteristic findings that help identify the diagnosis among the given options._x000D__x000D__x000D_ _x000D__x000D__x000D_ The correct answer is: B. Colocolonic intussusception_x000D__x000D__x000D_ _x000D__x000D__x000D_ Rationale for selecting colocolonic intussusception:_x000D__x000D__x000D_ _x000D__x000D__x000D_ The CT images show the classic ""ta…	Correct answer: B. Colocolonic intussusception_x000D__x000D__x000D_ Rationale for correct answer:_x000D__x000D__x000D_ The CT images show a characteristic “target sign” where one segment of the colon (the intussusceptum) telescopes into another (the intussuscipiens), which is indicative of colocolonic intussusception. This finding is consistent with the diagnosis as it involves the colon - to - c…
20230119	0	37	1	Physical Signs	A	Atopic eruption of pregnancy	immune_mediated_diseases	0.32	0.14	0.2	0.22	0.11	0.32	107251	0	0	0	C	No	No	D	No	No	C	No	No	No	No	No	2023-01-19	2025-04-07	https://www.nejm.org/image-challenge?ci=20230119&startFrom=101&startPage=6	A 37-year-old primigravid woman presented at 30 weeks’ gestation with a 4-month history of pruritic pustules on her torso, arms, and legs. On examination, there were papules, nodules, and follicular pustules with surrounding erythema, with no lesions on the palms and soles. A skin biopsy showed subepidermal pustules and perifollicular neutrophilic infiltration. Gram’s stain, periodic acid–Schiff …	**Correct Answer: C. Pemphigoid gestationis**_x000D__x000D__x000D_ _x000D__x000D__x000D_ ---_x000D__x000D__x000D_ _x000D__x000D__x000D_ ### **Clinical Reasoning:**_x000D__x000D__x000D_ _x000D__x000D__x000D_ The image shows **numerous erythematous papules and tense vesicles** and **bullae** clustered on an erythematous base, most prominently affecting the **abdomen and limbs** (as seen on the fore…	"Based on the clinical image provided, I'll analyze this dermatologic condition and select the most appropriate diagnosis from the options given._x000D__x000D__x000D_ _x000D__x000D__x000D_ The correct answer is: D. Polymorphic eruption of pregnancy_x000D__x000D__x000D_ _x000D__x000D__x000D_ Rationale for selecting Polymorphic eruption of pregnancy:_x000D__x000D__x000D_ The image shows characteris…	Correct answer: C. Pemphigoid gestationis_x000D__x000D__x000D_ Rationale for correct answer:_x000D__x000D__x000D_ Pemphigoid gestationis is an autoimmune blistering disease that occurs during pregnancy or the postpartum period. It typically presents with itchy, urticarial - like plaques that progress to tense blisters, which is consistent with the lesions seen in the image._x000D__x000D__x000D_ E…
20230126	1	14	1	Radiological	C	Cystic echinococcosis	infectious_diseases	0.13	0.12	0.52	0.16	0.17	0.52	45409	0	1	0	A	No	No	C	Yes	No	D	No	No	No	Yes	No	2023-01-26	2025-04-07	https://www.nejm.org/image-challenge?ci=20230126&startFrom=101&startPage=6	A previously healthy 14-year-old boy who lived on a farm presented with a 1-month history of episodic headaches associated with vomiting. Magnetic resonance imaging of the head was performed. Which of the following is the most likely diagnosis?_x000D__x000D__x000D_ _x000D__x000D__x000D_ A.Arachnoid cysts_x000D__x000D__x000D_ _x000D__x000D__x000D_ B.Colloid cyst_x000D__x000D__x000D_ _x000D__x000D_…	**Correct Answer: A. Arachnoid cysts**_x000D__x000D__x000D_ _x000D__x000D__x000D_ ---_x000D__x000D__x000D_ _x000D__x000D__x000D_ ### **Rationale:**_x000D__x000D__x000D_ _x000D__x000D__x000D_ The MRI images reveal large, sharply demarcated, CSF-intensity, extra-axial cystic lesions with a characteristic *smooth, non-enhancing wall* and *no surrounding edema or enhancement*. These features are **hi…	"Based on the MRI images provided, the correct answer is:_x000D__x000D__x000D_ _x000D__x000D__x000D_ **C. Cystic echinococcosis (hydatid cyst)**_x000D__x000D__x000D_ _x000D__x000D__x000D_ ## Rationale for selecting cystic echinococcosis:_x000D__x000D__x000D_ _x000D__x000D__x000D_ The MRI images show a large, well-defined, smooth-walled cystic lesion in the brain. The key characteristic features v…	Correct answer: D. Neurocysticercosis_x000D__x000D__x000D_ Rationale for correct answer:_x000D__x000D__x000D_ Neurocysticercosis is caused by the larval stage of the pork tapeworm Taenia solium. It typically presents with multiple cystic lesions in the brain, which can be seen on imaging. These cysts may contain a scolex, which is characteristic of neurocysticercosis._x000D__x000D__x000D_ Exclusi…
20230202	0	42	1	Physical Signs	A	Odontogenic cutaneous fistula	infectious_diseases	0.83	0.06	0.04	0.03	0.04	0.83	33580	1	1	1	A	Yes	No	A	Yes	No	A	Yes	No	Yes	Yes	Yes	2023-02-02	2025-04-07	https://www.nejm.org/image-challenge?ci=20230202&startFrom=101&startPage=6	A previously healthy 42-year-old woman presented to the dental clinic with a 6-month history of swelling and pain on the right side of her chin (left). She reported no history of chin trauma, tooth pain, or fevers, but did recall injuring her right lateral incisor 10 years prior. Palpation of the lesion caused pain and serosanguinous fluid drainage. Intra-oral examination showed discoloration of …	**Correct answer: A. Odontogenic cutaneous fistula**_x000D__x000D__x000D_ _x000D__x000D__x000D_ ---_x000D__x000D__x000D_ _x000D__x000D__x000D_ ### **Rationale:**_x000D__x000D__x000D_ _x000D__x000D__x000D_ The left image shows a skin lesion on the lower cheek with a small draining opening near the mandible, and the right image shows poor oral hygiene with visible gingival inflammation and dental p…	"Based on the clinical images provided, I believe the correct diagnosis is:_x000D__x000D__x000D_ _x000D__x000D__x000D_ **A. Odontogenic cutaneous fistula**_x000D__x000D__x000D_ _x000D__x000D__x000D_ ## Rationale for this diagnosis:_x000D__x000D__x000D_ _x000D__x000D__x000D_ The images show two key findings:_x000D__x000D__x000D_ 1. A cutaneous sinus tract/fistula on the skin of the chin with what …	Correct answer: A. Odontogenic cutaneous fistula_x000D__x000D__x000D_ Rationale for correct answer:_x000D__x000D__x000D_ Odontogenic cutaneous fistulas result from dental infections that have spread through the bone and soft tissues to the skin. The presence of a cutaneous opening (left image) in association with dental issues (right image) strongly suggests this diagnosis._x000D__x000D__x000D_ E…
20230209	1	77	1	Combination	B	Bilirubin	metabolic_nutritional_diseases	0.1	0.6	0.13	0.09	0.08	0.6	35020	0	0	0	D	No	No	E	No	No	E	No	No	No	No	No	2023-02-09	2025-04-07	https://www.nejm.org/image-challenge?ci=20230209&startFrom=101&startPage=6	A 77-year-old man with metastatic lung adenocarcinoma presented to the emergency department with a 2-week history of dyspnea. Imaging studies showed a pleural effusion on the right side, previously known liver metastases and perihepatic fluid, and new intrahepatic dilatation of the biliary ducts. A chest tube was placed, and the color of the drained pleural fluid was olive brown. What additional …	**Correct answer: D. Fungal stain and culture**_x000D__x000D__x000D_ _x000D__x000D__x000D_ ---_x000D__x000D__x000D_ _x000D__x000D__x000D_ ### **Clinical Analysis and Rationale:**_x000D__x000D__x000D_ _x000D__x000D__x000D_ The **chest radiograph** shows a **right-sided pleural effusion** with associated lung consolidation. The **pleural fluid** shown in the drainage container is **dark brown to bl…	"Looking at the provided images, I can see a chest X-ray showing a pleural effusion on the left side and collection containers with what appears to be pleural fluid that has a distinctive dark, chocolate-brown or black color._x000D__x000D__x000D_ _x000D__x000D__x000D_ The correct answer is: **E. Triglycerides**_x000D__x000D__x000D_ _x000D__x000D__x000D_ ## Rationale for selecting Triglycerides (E…	Correct answer: E. Triglycerides_x000D__x000D__x000D_ Rationale for correct answer:_x000D__x000D__x000D_ The chest X - ray shows pleural effusion, and the dark - colored fluid in the image suggests chylothorax. Chylothorax is characterized by the presence of lymphatic fluid in the pleural space, which is rich in triglycerides. Measuring triglyceride levels in the pleural fluid can confirm the dia…
20230216	0	80	1	Pathological	E	Pseudothrombocytosis due to red cell fragments	vascular_diseases	0.11	0.12	0.12	0.07	0.59	0.59	28026	0	0	0	B	No	No	B	No	No	A	No	No	No	No	No	2023-02-16	2025-04-07	https://www.nejm.org/image-challenge?ci=20230216&startFrom=101&startPage=6	An 80-year-old woman was admitted to the intensive care unit with severe second- and third-degree burns. On laboratory studies, she was noted to have a platelet count of 930,000 per cubic millimeter. Manual analysis of a subsequent peripheral-blood smear identified a platelet count of 115,000 per cubic millimeter. What is the cause for this discrepancy?_x000D__x000D__x000D_ _x000D__x000D__x000D_ …	**Correct answer: B. Pseudothrombocytopenia due to plate clumping associated with EDTA**_x000D__x000D__x000D_ _x000D__x000D__x000D_ ---_x000D__x000D__x000D_ _x000D__x000D__x000D_ ### **Rationale:**_x000D__x000D__x000D_ _x000D__x000D__x000D_ The peripheral blood smear provided shows **platelet clumping**, which is a classic artifact seen in **EDTA-dependent pseudothrombocytopenia**. This is an **i…	"Based on the peripheral blood smear image provided, I'll analyze each option to determine the correct diagnosis._x000D__x000D__x000D_ _x000D__x000D__x000D_ The answer is: **B. Pseudothrombocytopenia due to platelet clumping associated with EDTA**_x000D__x000D__x000D_ _x000D__x000D__x000D_ ## Detailed Rationale for Option B_x000D__x000D__x000D_ _x000D__x000D__x000D_ The image shows a peripheral b…	Correct answer: A. Pseudothrombocytopenia due to giant platelets_x000D__x000D__x000D_ Rationale for correct answer:_x000D__x000D__x000D_ In the image, a large platelet (giant platelet) is visible among the red blood cells. Giant platelets can cause pseudothrombocytopenia because automated hematology analyzers may misclassify them as red blood cells or white blood cells, leading to an erroneously …
20230223	0	52	1	Radiological	B	Encapsulating peritoneal sclerosis	immune_mediated_diseases	2.23	0.55	0.06	0.08	0.09	0.55	30218	1	1	0	B	Yes	No	B	Yes	No	A	No	No	Yes	Yes	No	2023-02-23	2025-04-07	https://www.nejm.org/image-challenge?ci=20230223&startFrom=101&startPage=6	A 52-year-old woman with end-stage kidney disease that was being managed with peritoneal dialysis presented with a 1-month history of bloody dialysate. She had had 3 episodes of bacterial peritonitis in the past 12 years. Physical examination and laboratory studies were unremarkable. Computed tomography of the abdomen was performed. What is the most likely diagnosis?_x000D__x000D__x000D_ _x000D__…	**Correct Answer: B. Encapsulating peritoneal sclerosis**_x000D__x000D__x000D_ _x000D__x000D__x000D_ ---_x000D__x000D__x000D_ _x000D__x000D__x000D_ ### **Rationale:**_x000D__x000D__x000D_ _x000D__x000D__x000D_ The CT image demonstrates hallmark findings of **encapsulating peritoneal sclerosis (EPS)**, a rare but severe complication of long-term peritoneal dialysis. Key features visible on this ab…	"Based on the CT image provided, I'll analyze this case and determine the most likely diagnosis from the options given._x000D__x000D__x000D_ _x000D__x000D__x000D_ **The correct answer is: B. Encapsulating peritoneal sclerosis**_x000D__x000D__x000D_ _x000D__x000D__x000D_ **Rationale for the selected diagnosis:**_x000D__x000D__x000D_ The CT image shows characteristic features of encapsulating perit…	Correct answer: A. Calciphylaxis_x000D__x000D__x000D_ Rationale for correct answer:_x000D__x000D__x000D_ Calciphylaxis is characterized by calcification within the small - and medium - sized arteries of the skin and subcutaneous tissues, often seen in patients with end - stage renal disease. The CT scan may show calcifications in the peritoneal region, which is consistent with the pathophysiology…
20230302	1	62	1	Combination	A	Erdheim–Chester disease	immune_mediated_diseases	0.38	0.16	0.23	0.1	0.13	0.38	41066	1	1	0	A	Yes	No	A	Yes	No	B	No	No	Yes	Yes	No	2023-03-02	2025-04-07	https://www.nejm.org/image-challenge?ci=20230302&startFrom=101&startPage=6	A 62-year-old man undergoing abdominal ultrasonography for the evaluation of gallstones was found to have a retroperitoneal mass. A physical examination and the results of routine laboratory studies were normal. A computed tomographic (CT) urogram was completed (left), and a subsequent positron-emission tomography–CT showed no hypermetabolic activity. He underwent stent placement in both ureters,…	### **Correct Answer: A. Erdheim–Chester disease**_x000D__x000D__x000D_ _x000D__x000D__x000D_ ---_x000D__x000D__x000D_ _x000D__x000D__x000D_ ### **Rationale:**_x000D__x000D__x000D_ _x000D__x000D__x000D_ This clinical case presents two key diagnostic components:_x000D__x000D__x000D_ _x000D__x000D__x000D_ #### **1. Radiologic findings (Left Panel):**_x000D__x000D__x000D_ _x000D__x000D__x000D_ * **B…	"Looking at the provided medical images, I can see:_x000D__x000D__x000D_ _x000D__x000D__x000D_ 1. Left image: Coronal CT scan showing bilateral renal involvement with hypodense lesions in the kidneys (indicated by white arrows)_x000D__x000D__x000D_ 2. Right image: Histopathological specimen showing tissue infiltration with histiocyte-like cells and inflammatory cells (marked with green arrows)_x0…	Correct answer: B. IgG4 - related disease_x000D__x000D__x000D_ Rationale for correct answer:_x000D__x000D__x000D_ IgG4 - related disease can involve multiple organs, including the kidneys as seen on the CT scan. Histologically, it is characterized by a dense lymphoplasmacytic infiltrate with numerous IgG4 - positive plasma cells (which may be indicated by the green arrows on the histopathology im…
20230309	0	30	1	Combination	C	Malignant acanthosis nigricans	neoplastic_diseases	0.07	0.13	0.54	0.14	0.14	0.54	45021	1	1	0	C	Yes	No	C	Yes	No	D	No	No	Yes	Yes	No	2023-03-09	2025-04-07	https://www.nejm.org/image-challenge?ci=20230309&startFrom=101&startPage=6	A 30-year-old woman presented with a 3-month history of progressive skin lesions on her face. On physical examination, there were hyperpigmented, yellow, papillomatous papules and plaques on the face (left). Hyperpigmented velvety plaques were also seen on the skin of the neck, groin and axillae. She also reported new-onset heartburn, fatigue, and unintentional 15-kg weight loss. A skin biopsy of…	**Correct Answer: C. Malignant acanthosis nigricans**_x000D__x000D__x000D_ _x000D__x000D__x000D_ ---_x000D__x000D__x000D_ _x000D__x000D__x000D_ ### **Rationale:**_x000D__x000D__x000D_ _x000D__x000D__x000D_ The clinical image demonstrates **hyperkeratotic, papillomatous, verrucous plaques** around the **oral mucosa and nasolabial folds**, which appear **thickened and velvety**—hallmarks of **acant…	"Based on the provided clinical images, I'll analyze the case and determine the most likely diagnosis from the given options._x000D__x000D__x000D_ _x000D__x000D__x000D_ The images show:_x000D__x000D__x000D_ 1. Left image: Significant perioral and facial skin involvement with hyperpigmented, verrucous, papillomatous lesions particularly pronounced around the mouth and extending to the periorbital …	Correct answer: D. Pellagra (Vitamin B3 deficiency)_x000D__x000D__x000D_ Rationale for correct answer:_x000D__x000D__x000D_ Pellagra, caused by vitamin B3 (niacin) deficiency, presents with the classic “3 Ds”: dermatitis, diarrhea, and dementia. The dermatitis is often characterized by hyperpigmented, scaly, and crusty lesions in sun - exposed areas, which can involve the face as seen in the imag…
20230316	1	1-12	1	Radiological	E	Slipped capital femoral epiphysis	traumatic_physical_diseases	0.05	0.16	0.09	0.03	0.67	0.67	30991	1	1	1	E	Yes	No	E	Yes	No	E	Yes	No	Yes	Yes	Yes	2023-03-16	2025-04-07	https://www.nejm.org/image-challenge?ci=20230316&startFrom=101&startPage=6	A 12-year-old boy with a history of obesity presented with a 2-week history of limping and dull pain in the right hip. The symptoms had begun after he had slipped and fallen at school. On physical exam, active and passive ranges of motion of the right hip were limited by pain. Radiographs of the pelvis were performed (frog-leg lateral view is shown). What is the most likely diagnosis?_x000D__x000…	**Correct Answer: E. Slipped capital femoral epiphysis (SCFE)**_x000D__x000D__x000D_ _x000D__x000D__x000D_ ---_x000D__x000D__x000D_ _x000D__x000D__x000D_ ### **Rationale:**_x000D__x000D__x000D_ _x000D__x000D__x000D_ The radiograph provided is an **anteroposterior (AP) pelvis view** showing displacement of the femoral head relative to the femoral neck—**posteromedial slippage**—which is diagnostic…	"Looking at the provided radiographic image of the pelvis and hips, I can identify characteristic findings that point to a specific diagnosis among the five options._x000D__x000D__x000D_ _x000D__x000D__x000D_ The correct answer is: **E. Slipped capital femoral epiphysis (SCFE)**_x000D__x000D__x000D_ _x000D__x000D__x000D_ ## Radiographic findings supporting SCFE:_x000D__x000D__x000D_ The X-ray sho…	Correct answer: E. Slipped capital femoral epiphysis_x000D__x000D__x000D_ Rationale for correct answer:_x000D__x000D__x000D_ The X - ray shows displacement of the capital femoral epiphysis in relation to the femoral neck, which is characteristic of slipped capital femoral epiphysis (SCFE). This condition typically occurs in adolescents and can present with hip pain and limited range of motion._x0…
20230323	0	37	1	Physical Signs	D	Neonatal herpes simplex virus	infectious_diseases	0.09	0.08	0.11	0.65	0.06	0.65	48734	1	0	1	D	Yes	No	C	No	No	D	Yes	No	Yes	No	Yes	2023-03-23	2025-04-07	https://www.nejm.org/image-challenge?ci=20230323&startFrom=101&startPage=6	A baby girl was noted to have vesicular skin lesions immediately after spontaneous vaginal delivery at 32 weeks’ gestation. Her 37-year-old mother had premature rupture of membranes 12 days before the delivery. On physical examination, clusters of vesicles were seen on the infant’s torso (left), periumbilical region (right), and pharyngeal, nasal, and conjunctival mucosa. No lesions were seen on …	**Correct answer: D. Neonatal herpes simplex virus**_x000D__x000D__x000D_ _x000D__x000D__x000D_ ---_x000D__x000D__x000D_ _x000D__x000D__x000D_ ### **Rationale:**_x000D__x000D__x000D_ _x000D__x000D__x000D_ The clinical images show grouped vesicular lesions on an erythematous base in a neonate, prominently distributed on the abdomen and periumbilical region. The appearance of these vesicles in clus…	"Based on the clinical images provided, the most likely diagnosis is:_x000D__x000D__x000D_ _x000D__x000D__x000D_ C. Molluscum contagiosum_x000D__x000D__x000D_ _x000D__x000D__x000D_ ## Rationale for Molluscum contagiosum:_x000D__x000D__x000D_ The images show multiple small, dome-shaped, pearly white to flesh-colored papules with characteristic central umbilication (especially visible in the right …	Correct answer: D. Neonatal herpes simplex virus_x000D__x000D__x000D_ Rationale for correct answer:_x000D__x000D__x000D_ Neonatal herpes simplex virus (HSV) infection can present with vesicular or pustular skin lesions in a neonate. The grouped vesicles seen in the image are characteristic of HSV infection. Neonates are at high risk of severe complications from HSV, making early diagnosis crucial…
20230330	0	33	1	Physical Signs	C	Palmar erythema of pregnancy	immune_mediated_diseases	0.09	0.1	0.67	0.11	0.04	0.67	36981	1	1	1	C	Yes	No	C	Yes	No	C	Yes	No	Yes	Yes	Yes	2023-03-30	2025-04-07	https://www.nejm.org/image-challenge?ci=20230330&startFrom=101&startPage=6	A pregnant 33-year-old woman at 35 weeks’ gestation presented with redness on both palms without pain and pruritus. She was otherwise asymptomatic. The skin changes had first appeared during the second trimester of pregnancy. Skin examination was notable for mottled, blanching erythema across the palms and fingers of both hands. What is the diagnosis?_x000D__x000D__x000D_ _x000D__x000D__x000D_ A.…	**Correct answer: C. Palmar erythema of pregnancy**_x000D__x000D__x000D_ _x000D__x000D__x000D_ ---_x000D__x000D__x000D_ _x000D__x000D__x000D_ ### **Rationale:**_x000D__x000D__x000D_ _x000D__x000D__x000D_ The image shows **bilateral, symmetric erythema** over the palms, particularly in the thenar and hypothenar areas, with no signs of scaling, vesicles, or inflammation. The skin appears otherwise …	"Based on the clinical image provided, I'll analyze this dermatological presentation and select the most appropriate diagnosis from the options._x000D__x000D__x000D_ _x000D__x000D__x000D_ The correct answer is: C. Palmar erythema of pregnancy_x000D__x000D__x000D_ _x000D__x000D__x000D_ Rationale for selecting palmar erythema of pregnancy:_x000D__x000D__x000D_ - The image shows bilateral, symmetric…	Correct answer: C. Palmar erythema of pregnancy_x000D__x000D__x000D_ Rationale for correct answer:_x000D__x000D__x000D_ Palmar erythema of pregnancy presents as a reddening of the palms, which is due to increased estrogen levels during pregnancy. The image shows symmetric redness of the palms, consistent with this diagnosis._x000D__x000D__x000D_ Exclusion of other options:_x000D__x000D__x000D_ A.…
20230406	1	87	1	Radiological	A	Cecal volvulus	traumatic_physical_diseases	0.57	0.06	0.05	0.23	0.1	0.57	33618	1	0	1	A	Yes	No	D	No	No	A	Yes	No	Yes	No	Yes	2023-04-06	2025-04-07	https://www.nejm.org/image-challenge?ci=20230406&startFrom=101&startPage=6	An 87-year-old man with chronic kidney disease, hypertension, and atrial fibrillation presented to the emergency department with a 3-day history of constipation and lower abdominal pain. Physical examination was notable for abdominal distention and tenderness to palpation of the right lower quadrant without rebound or guarding. A plain radiograph of the abdomen is shown. What is the most likely d…	**Correct answer: A. Cecal volvulus**_x000D__x000D__x000D_ _x000D__x000D__x000D_ ### Rationale:_x000D__x000D__x000D_ _x000D__x000D__x000D_ The abdominal radiograph shows a markedly dilated, air-filled loop of colon in the mid-abdomen with a characteristic **“coffee bean” sign**, suggestive of **cecal volvulus**. The distended cecum is displaced from its normal location in the right lower quadrant…	"Looking at this abdominal X-ray image, I'll analyze the findings to determine the most likely diagnosis from the options provided._x000D__x000D__x000D_ _x000D__x000D__x000D_ **The correct answer is D. Ogilvie's Syndrome (acute colonic pseudo-obstruction).**_x000D__x000D__x000D_ _x000D__x000D__x000D_ ## Rationale for Ogilvie's Syndrome:_x000D__x000D__x000D_ The X-ray shows a markedly dilated colo…	Correct answer: A. Cecal volvulus_x000D__x000D__x000D_ Rationale for correct answer:_x000D__x000D__x000D_ The X - ray shows a markedly dilated cecum in the left upper quadrant, which is characteristic of cecal volvulus. Cecal volvulus occurs when the cecum twists on its mesentery, leading to obstruction and dilation of the cecum._x000D__x000D__x000D_ Exclusion of other options:_x000D__x000D__x000…
20230413	0	34	1	Combination	A	Desquamative interstitial pneumonia	immune_mediated_diseases	0.39	0.12	0.11	0.15	0.23	0.39	41682	1	0	0	A	Yes	No	E	No	No	E	No	No	Yes	No	No	2023-04-13	2025-04-07	https://www.nejm.org/image-challenge?ci=20230413&startFrom=101&startPage=6	A 34-year-old woman with tobacco use disorder was referred to the pulmonary clinic for worsening dyspnea and dry cough. She had chronic hypoxemic respiratory failure of unknown cause, requiring supplemental oxygen. Computed tomography of the chest showed diffuse ground-glass opacities and areas of peripheral consolidation but no basilar reticulations or honeycombing. Bronchoalveolar lavage was no…	**Correct answer: A. Desquamative interstitial pneumonia**_x000D__x000D__x000D_ _x000D__x000D__x000D_ ---_x000D__x000D__x000D_ _x000D__x000D__x000D_ ### **Rationale:**_x000D__x000D__x000D_ _x000D__x000D__x000D_ The case presents two key images:_x000D__x000D__x000D_ _x000D__x000D__x000D_ 1. **High-resolution chest CT (left image)** showing **diffuse ground-glass opacities** predominantly in the lo…	"Based on the clinical images provided, I'll analyze this pulmonary case and select the most appropriate diagnosis from the options._x000D__x000D__x000D_ _x000D__x000D__x000D_ The correct answer is: **E. Pulmonary alveolar proteinosis**_x000D__x000D__x000D_ _x000D__x000D__x000D_ ## Rationale for Pulmonary Alveolar Proteinosis (PAP):_x000D__x000D__x000D_ _x000D__x000D__x000D_ The images show key d…	Correct answer: E. Pulmonary alveolar proteinosis_x000D__x000D__x000D_ Rationale for correct answer:_x000D__x000D__x000D_ The CT scan shows ground - glass opacities and the microscopic image shows the presence of amorphous, periodic acid - Schiff (PAS) - positive material filling the alveoli, which is characteristic of pulmonary alveolar proteinosis. In this condition, there is abnormal accumulat…
20230420	0	60	1	Radiological	A	Assault	traumatic_physical_diseases	0.42	0.15	0.12	0.19	0.12	0.42	45548	0	0	0	C	No	No	D	No	No	B	No	No	No	No	No	2023-04-20	2025-04-07	https://www.nejm.org/image-challenge?ci=20230420&startFrom=101&startPage=6	A 60-year-old left-handed woman presented to the emergency department with pain in her left forearm. The arm was swollen and tender, especially with passive pronation and supination. The overlying skin was intact, and the results of neurovascular examination were normal. Radiographs of the left forearm were performed (upper image, anteroposterior view; lower image, lateral view). The findings sho…	**Correct answer: C. Malignancy**_x000D__x000D__x000D_ _x000D__x000D__x000D_ ---_x000D__x000D__x000D_ _x000D__x000D__x000D_ ### **Rationale:**_x000D__x000D__x000D_ _x000D__x000D__x000D_ The radiograph of the forearm reveals a **pathologic fracture** of the distal radius. Notably, there is:_x000D__x000D__x000D_ _x000D__x000D__x000D_ * A **transverse fracture** through the distal radial diaphysis._…	"Based on the provided radiographic image showing both forearms, I can analyze the findings and determine the most likely diagnosis from the options provided._x000D__x000D__x000D_ _x000D__x000D__x000D_ The correct answer is D. Osteoporosis._x000D__x000D__x000D_ _x000D__x000D__x000D_ Rationale for selecting D. Osteoporosis:_x000D__x000D__x000D_ The X-ray shows bilateral forearm fractures with seve…	Correct answer: B. Fall_x000D__x000D__x000D_ Rationale for correct answer:_x000D__x000D__x000D_ The X - ray shows a fracture of the forearm. A fall is a common cause of such fractures, especially in the context of a person trying to break their fall with an outstretched hand, which can lead to fractures of the radius and ulna._x000D__x000D__x000D_ Exclusion of other options:_x000D__x000D__x000D_ …
20230427	0	75	1	Physical Signs	B	Gardening	traumatic_physical_diseases	0.21	0.45	0.1	0.13	0.11	0.45	67050	1	0	1	B	Yes	Yes	E	No	No	B	Yes	No	Yes	No	Yes	2023-04-27	2025-04-07	https://www.nejm.org/image-challenge?ci=20230427&startFrom=101&startPage=6	A 75-year-old woman presented to the infectious diseases clinic with a 10-day history of painful lesions on the right hand and forearm. An aspiration of the hand lesion was performed. Bacterial culture of the aspirate grew filamentous, gram-positive, acid-fast branching rods. Which of the following activities likely preceded development of the lesions?_x000D__x000D__x000D_ _x000D__x000D__x000D_ A…	**Correct answer: B. Gardening**_x000D__x000D__x000D_ _x000D__x000D__x000D_ ---_x000D__x000D__x000D_ _x000D__x000D__x000D_ ### **Diagnosis: Sporotrichosis (Sporothrix schenckii infection)**_x000D__x000D__x000D_ _x000D__x000D__x000D_ ---_x000D__x000D__x000D_ _x000D__x000D__x000D_ ### **Rationale:**_x000D__x000D__x000D_ _x000D__x000D__x000D_ The images show:_x000D__x000D__x000D_ _x000D__x000D__x000…	"Based on the clinical images provided, I'll analyze this dermatological case and select the most likely diagnosis from the given options._x000D__x000D__x000D_ _x000D__x000D__x000D_ The correct answer is: E. Petting an armadillo_x000D__x000D__x000D_ _x000D__x000D__x000D_ Detailed rationale for selecting option E:_x000D__x000D__x000D_ The images show multiple erythematous nodular and ulcerating le…	Correct answer: B. Gardening_x000D__x000D__x000D_ Rationale for correct answer:_x000D__x000D__x000D_ The skin lesions shown in the image are consistent with sporotrichosis, which is commonly acquired through contact with soil and plants. Gardening involves exposure to soil and plant material, making it a likely source of infection with Sporothrix schenckii, the causative agent of sporotrichosis._…
20230504	1	66	1	Physical Signs	A	Eosinophilic fasciitis	immune_mediated_diseases	0.36	0.09	0.16	0.2	0.19	0.36	65508	1	1	1	A	Yes	No	A	Yes	No	A	Yes	No	Yes	Yes	Yes	2023-05-04	2025-04-07	https://www.nejm.org/image-challenge?ci=20230504&startFrom=101&startPage=6	A 66-year-old man presented with an 8-month history of painful skin tightening and swelling of his arms and legs. The symptoms had progressed on glucocorticoids and methotrexate. On physical exam, there was symmetric, woody induration of the trunk, arms, and legs, sparing the hands and feet. The involved skin had a dimpled appearance. Elevation of the arms resulted in visible indentions along the…	**Correct Answer: A. Eosinophilic fasciitis**_x000D__x000D__x000D_ _x000D__x000D__x000D_ ---_x000D__x000D__x000D_ _x000D__x000D__x000D_ ### **Clinical Reasoning and Diagnosis:**_x000D__x000D__x000D_ _x000D__x000D__x000D_ The image shows a characteristic **“groove sign”** — visible longitudinal depressions along superficial veins on the forearm. This finding is pathognomonic for **eosinophilic fas…	"Based on the clinical image provided, I need to identify the correct diagnosis from the options listed._x000D__x000D__x000D_ _x000D__x000D__x000D_ The image shows an arm with notable skin changes including:_x000D__x000D__x000D_ - Thickened, taut-appearing skin_x000D__x000D__x000D_ - Loss of normal skin folds and creases_x000D__x000D__x000D_ - A woody or indurated appearance_x000D__x000D__x000D_ …	Correct answer: A. Eosinophilic fasciitis_x000D__x000D__x000D_ Rationale for correct answer:_x000D__x000D__x000D_ Eosinophilic fasciitis presents with thickening and induration of the skin and underlying fascia, often with a “peau d’orange” appearance and associated with eosinophilia. The image shows thickening and dimpling of the skin, which is consistent with the clinical presentation of eosino…
20230511	1	55	1	Physical Signs	D	Miliaria crystallina	neoplastic_diseases	0.08	0.16	0.09	0.57	0.1	0.57	46267	1	1	0	D	Yes	No	D	Yes	No	_	No	No	Yes	Yes	0	2023-05-11	2025-04-07	https://www.nejm.org/image-challenge?ci=20230511&startFrom=81&startPage=5	A 55-year-old man who had been admitted to the intensive care unit had a sudden-onset vesicular rash appear across his trunk and arms, as shown. He had undergone a small-bowel resection; his post-operative course had been complicated by sepsis, fevers, and respiratory failure. On exam, he was wrapped tightly in blankets. The vesicles did not rupture with light palpation but broke when more pressu…	**Correct Answer: D. Miliaria crystallina**_x000D__x000D__x000D_ _x000D__x000D__x000D_ ---_x000D__x000D__x000D_ _x000D__x000D__x000D_ ### **Rationale:**_x000D__x000D__x000D_ _x000D__x000D__x000D_ The image shows numerous, tiny, superficial, clear vesicles over the trunk and axillary area on normal-appearing skin. The vesicles appear to sit just under the stratum corneum without associated erythem…	"Based on the clinical image provided, I'll analyze the skin findings and provide my diagnosis._x000D__x000D__x000D_ _x000D__x000D__x000D_ The correct answer is: D. Miliaria crystallina_x000D__x000D__x000D_ _x000D__x000D__x000D_ Rationale for Miliaria crystallina:_x000D__x000D__x000D_ The image shows multiple small, clear, superficial vesicles that appear like water droplets on the skin surface. …	Sorry, I can't answer this question. Please modify it and try again. If you need any other information or have other questions, I will do my best to assist you.
20230518	1	44	1	Physical Signs	E	Malignant syphilis	infectious_diseases	0.17	0.14	0.06	0.18	0.45	0.45	73750	0	1	0	B	No	No	E	Yes	No	_	No	No	No	Yes	0	2023-05-18	2025-04-07	https://www.nejm.org/image-challenge?ci=20230518&startFrom=81&startPage=5	A 44-year-old man with a history of human immunodeficiency virus infection and intermittent adherence to antiretroviral therapy presented to the infectious disease clinic with a 1-month history of fevers and pruritic skin lesions. Physical examination was notable for blackish-brown lamellated plaques on the limbs and scalp. Laboratory studies were notable for a CD4 cell count of 86 per cubic mill…	**Correct answer: B. Erythema gyratum repens**_x000D__x000D__x000D_ _x000D__x000D__x000D_ ---_x000D__x000D__x000D_ _x000D__x000D__x000D_ ### **Rationale:**_x000D__x000D__x000D_ _x000D__x000D__x000D_ The clinical image shows **distinctive concentric, wood-grain–like or zebra-striped plaques** on the patient’s arm and side of the torso. This classic appearance strongly supports the diagnosis of **e…	"Based on the clinical image provided, the correct answer is:_x000D__x000D__x000D_ _x000D__x000D__x000D_ **E. Malignant syphilis**_x000D__x000D__x000D_ _x000D__x000D__x000D_ ### Rationale for choosing Malignant syphilis:_x000D__x000D__x000D_ _x000D__x000D__x000D_ The image shows distinctive characteristics of malignant syphilis (also known as lues maligna or noduloulcerative secondary syphilis), …	Sorry, I can't answer this question. Please modify it and try again. If you need any other information or have other questions, I will do my best to assist you.
20230601	1	35	1	Radiological	D	Posterior reversible encephalopathy syndrome	vascular_diseases	0.25	0.07	0.11	0.47	0.11	0.47	46275	0	0	0	B	No	No	B	No	No	A	No	No	No	No	No	2023-06-01	2025-04-07	https://www.nejm.org/image-challenge?ci=20230601&startFrom=81&startPage=5	A 35-year-old man with IgA nephropathy presented with confusion, blurry vision, and seizures. Two weeks before presentation, he had started receiving cyclosporine. Physical examination was notable for a blood pressure of 160/80 mm Hg, drowsiness, and decreased visual acuity. A fundoscopic examinations was normal. T2-weighted magnetic resonance imaging (MRI) with fluid-attenuated inversion recover…	**Correct answer: B. Methanol ingestion**_x000D__x000D__x000D_ _x000D__x000D__x000D_ ---_x000D__x000D__x000D_ _x000D__x000D__x000D_ ### **Rationale:**_x000D__x000D__x000D_ _x000D__x000D__x000D_ The provided axial brain MRI images show **bilateral symmetric hyperintensities in the putamen and subcortical white matter**, particularly in the basal ganglia region, which is **highly characteristic of …	"Based on the MRI images provided, I'll analyze this case and determine the most likely diagnosis from the options presented._x000D__x000D__x000D_ _x000D__x000D__x000D_ # The correct answer is B. Methanol ingestion_x000D__x000D__x000D_ _x000D__x000D__x000D_ ## Rationale for Methanol Ingestion_x000D__x000D__x000D_ The MRI images show bilateral, relatively symmetric hyperintensities on T2-weighted …	Correct answer: A. Acute demyelinating encephalomyelitis_x000D__x000D__x000D_ Rationale for correct answer:_x000D__x000D__x000D_ The MRI shows multifocal, confluent white matter lesions, which are characteristic of acute demyelinating encephalomyelitis (ADEM). ADEM is an inflammatory demyelinating disorder that typically presents with a monophasic, acute - onset illness, often following a viral i…
20230608	1	32	1	Physical Signs	E	Xylazine	drug_toxin_related_diseases	0.15	0.14	0.15	0.21	0.35	0.35	73122	1	0	0	E	Yes	No	B	No	No	B	No	No	Yes	No	No	2023-06-08	2025-04-07	https://www.nejm.org/image-challenge?ci=20230608&startFrom=81&startPage=5	A 32-year-old man presented with 1-month history of enlarging necrotic chest wounds. He reported a 3-year history of daily use of fentanyl by injection into his neck and arm veins. CT of the chest showed osteomyelitis of the clavicles and manubrium, in addition to soft-tissue ulceration and inflammation. Adulteration of fentanyl by which of the following substances is most likely to have contribu…	**Correct answer: E. Xylazine**_x000D__x000D__x000D_ _x000D__x000D__x000D_ ---_x000D__x000D__x000D_ _x000D__x000D__x000D_ ### **Rationale:**_x000D__x000D__x000D_ _x000D__x000D__x000D_ The image shows **large, necrotic ulcerations** with eschar formation and surrounding erythema in the **cervical area**, which is characteristic of **xylazine-associated skin ulcers**. Xylazine, a veterinary sedativ…	"Based on the clinical image provided, I can see bilateral necrotic lesions in what appears to be the nasal area, with black eschar formation and surrounding erythema. This presentation is characteristic of certain drug-associated vasculopathy._x000D__x000D__x000D_ _x000D__x000D__x000D_ The correct answer is: B. Levamisole_x000D__x000D__x000D_ _x000D__x000D__x000D_ Rationale for selecting Levamis…	Correct answer: B. Levamisole_x000D__x000D__x000D_ Rationale for correct answer:_x000D__x000D__x000D_ The image shows skin necrosis, which is a characteristic complication associated with levamisole - contaminated cocaine use. Levamisole, when used as a cutting agent in cocaine, can cause vasculitis and subsequent skin necrosis, often presenting in the ears, nose, and cheeks._x000D__x000D__x000D_…
20230615	1	67	1	Physical Signs	B	Cryoglobulinemic vasculitis	immune_mediated_diseases	0.05	0.58	0.1	0.17	0.11	0.58	34426	1	1	1	B	Yes	No	B	Yes	No	B	Yes	No	Yes	Yes	Yes	2023-06-15	2025-04-07	https://www.nejm.org/image-challenge?ci=20230615&startFrom=81&startPage=5	A 67-year-old man with chronic lymphocytic leukemia (CLL) presented with a painful rash. On physical examination, there was purple discoloration of the ear along with livedoid skin changes on the cheek and purpura on both calves. A skin biopsy showed leukocytoclastic vasculitis. Laboratory testing was notable for a low complement 4 level. What is the most likely diagnosis?_x000D__x000D__x000D_ _x…	**Correct Answer: B. Cryoglobulinemic vasculitis**_x000D__x000D__x000D_ _x000D__x000D__x000D_ ---_x000D__x000D__x000D_ _x000D__x000D__x000D_ ### **Rationale:**_x000D__x000D__x000D_ _x000D__x000D__x000D_ The clinical images show:_x000D__x000D__x000D_ _x000D__x000D__x000D_ * **Palpable purpura** on the lower extremities — a hallmark of small-vessel vasculitis._x000D__x000D__x000D_ * **Violaceous, i…	"Based on the clinical images provided, the correct answer is:_x000D__x000D__x000D_ _x000D__x000D__x000D_ **B. Cryoglobulinemic vasculitis**_x000D__x000D__x000D_ _x000D__x000D__x000D_ **Rationale for choosing cryoglobulinemic vasculitis:**_x000D__x000D__x000D_ The images show characteristic findings of cryoglobulinemic vasculitis, including:_x000D__x000D__x000D_ 1. Purpuric lesions with a promine…	Correct answer: B. Cryoglobulinemic vasculitis_x000D__x000D__x000D_ Rationale for correct answer:_x000D__x000D__x000D_ The image shows purpuric skin lesions, which are characteristic of vasculitis. Cryoglobulinemic vasculitis is associated with the presence of cryoglobulins (abnormal proteins that precipitate in cold temperatures). These cryoglobulins can deposit in blood vessels, leading to vasc…
20230622	1	39	1	Physical Signs	D	Herpes vegetans	infectious_diseases	0.23	0.13	0.14	0.39	0.11	0.39	47058	0	0	0	E	No	No	B	No	No	_	No	No	No	No	0	2023-06-22	2025-04-07	https://www.nejm.org/image-challenge?ci=20230622&startFrom=81&startPage=5	A 39-year-old man with human immunodeficiency virus infection that was being treated with antiretroviral therapy presented to the dermatology clinic with a 1-year history of recurrent, painful penile ulcers. Approximately once per month, erosions would appear ulcerate, heal spontaneously and then recur. Laboratory testing showed a CD4 cell count of 494 per cubic millimeter (reference range, 414 t…	**Correct Answer: E. Pemphigus vegetans**_x000D__x000D__x000D_ _x000D__x000D__x000D_ ---_x000D__x000D__x000D_ _x000D__x000D__x000D_ ### **Rationale:**_x000D__x000D__x000D_ _x000D__x000D__x000D_ The image shows a large, exudative, vegetating, eroded lesion with a moist, verrucous surface in the inguinal region—findings highly characteristic of **pemphigus vegetans**, a rare variant of pemphigus vu…	"Based on the clinical image provided, I'll select the most appropriate diagnosis from the options._x000D__x000D__x000D_ _x000D__x000D__x000D_ The correct answer is B. Condyloma acuminata._x000D__x000D__x000D_ _x000D__x000D__x000D_ The image shows soft, flesh-colored, exophytic, papillomatous growths in the perianal region. These are characteristic features of condyloma acuminata (genital warts),…	Sorry, I can't answer this question. Please modify it and try again. If you need any other information or have other questions, I will do my best to assist you.
20230706	1	38	1	Physical Signs	B	Corynebacterium minutissimum	infectious_diseases	0.13	0.38	0.19	0.09	0.2	0.38	45684	1	0	0	B	Yes	No	C	No	No	_	No	No	Yes	No	0	2023-07-06	2025-04-06	https://www.nejm.org/image-challenge?ci=20230706&startFrom=81&startPage=5	A 38-year-old man presented with a 9-month history of a mildly itchy rash in his groin. The rash had been previously diagnosed as tinea cruris, but it had not improved with topical antifungal treatment. On physical examination, well-circumscribed, reddish-brown plaques were visualized in the inguinal folds when the patient elevated his genitals (left image). No scaling or satellite lesions were p…	**Correct answer: B. *Corynebacterium minutissimum***_x000D__x000D__x000D_ _x000D__x000D__x000D_ ---_x000D__x000D__x000D_ _x000D__x000D__x000D_ ### **Rationale:**_x000D__x000D__x000D_ _x000D__x000D__x000D_ The clinical image on the **left** shows **well-demarcated, erythematous patches** in the intertriginous area (inguinal folds), consistent with **intertrigo**. The **Wood’s lamp examination on …	"Based on the clinical images provided, I can assess this dermatological condition affecting the inguinal/scrotal region._x000D__x000D__x000D_ _x000D__x000D__x000D_ The correct answer is: C. Malassezia furfur_x000D__x000D__x000D_ _x000D__x000D__x000D_ Rationale for selecting Malassezia furfur:_x000D__x000D__x000D_ The images show erythematous, scaly patches in the inguinal and scrotal regions wit…	Sorry, I can't answer this question. Please modify it and try again. If you need any other information or have other questions, I will do my best to assist you.
20230713	1	78	1	Combination	B	Laryngeal candidiasis	infectious_diseases	0.12	0.57	0.15	0.14	0.02	0.57	32142	0	0	0	A	No	No	A	No	No	_	No	No	No	No	0	2023-07-13	2025-04-06	https://www.nejm.org/image-challenge?ci=20230713&startFrom=81&startPage=5	A 78-year-old man with chronic obstructive pulmonary disease (COPD) presented with a 2-month history of dysphonia. For the past 10 years, he had used an inhaled glucocorticoid daily to manage his COPD. Fiberoptic laryngoscopy revealed white plaques on both vocal cords. A biopsy showed hyperkeratinized stratified squamous epithelium and threadlike filaments that stained with Grocott-Gomori methena…	**Correct answer: A. Laryngeal amyloidosis**_x000D__x000D__x000D_ _x000D__x000D__x000D_ ---_x000D__x000D__x000D_ _x000D__x000D__x000D_ ### **Rationale:**_x000D__x000D__x000D_ _x000D__x000D__x000D_ The **left image** shows an endoscopic view of the larynx with multiple submucosal, nodular, waxy-appearing lesions on the true vocal cords — these are classically described in **localized laryngeal amy…	"Based on the clinical images provided, I'll analyze this case to determine the most likely diagnosis from the options given._x000D__x000D__x000D_ _x000D__x000D__x000D_ The correct answer is: **A. Laryngeal amyloidosis**_x000D__x000D__x000D_ _x000D__x000D__x000D_ ## Rationale for Laryngeal Amyloidosis:_x000D__x000D__x000D_ _x000D__x000D__x000D_ The images show:_x000D__x000D__x000D_ 1. Left image:…	Sorry, I can't answer this question. Please modify it and try again. If you need any other information or have other questions, I will do my best to assist you.
20230720	1	26	1	Radiological	E	Superior mesenteric artery syndrome	vascular_diseases	0.11	0.2	0.16	0.12	0.41	0.41	38254	0	0	0	C	No	No	C	No	No	A	No	No	No	No	No	2023-07-20	2025-04-06	https://www.nejm.org/image-challenge?ci=20230720&startFrom=81&startPage=5	A 26-year-old man from Somalia presented with a 5-month history of dry cough, night sweats, and unintentional weight loss of 18 kg. During this period, epigastric pain and postprandial vomiting had also developed. His BMI was 11. On examination, he was cachectic with abdominal distention and diffuse tenderness to palpation. On the basis of chest imaging and sputum studies, a diagnosis of pulmonar…	**Correct Answer: C. Gastrointestinal lymphoma**_x000D__x000D__x000D_ _x000D__x000D__x000D_ ---_x000D__x000D__x000D_ _x000D__x000D__x000D_ ### **Clinical and Imaging Interpretation:**_x000D__x000D__x000D_ _x000D__x000D__x000D_ The CT images show a large, homogenous soft-tissue mass in the retroperitoneal region, with mild mass effect on adjacent structures but without signs of bowel obstruction, …	"Based on the imaging studies provided, I'll analyze each diagnostic option:_x000D__x000D__x000D_ _x000D__x000D__x000D_ The correct answer is: C. Gastrointestinal lymphoma_x000D__x000D__x000D_ _x000D__x000D__x000D_ Rationale for selecting Gastrointestinal lymphoma:_x000D__x000D__x000D_ The imaging shows significant findings in both the abdominal CT (left image) and spinal MRI (right image). In th…	Correct answer: A. Chronic mesenteric ischemia_x000D__x000D__x000D_ Rationale for correct answer:_x000D__x000D__x000D_ The CT images show findings consistent with chronic mesenteric ischemia, such as narrowing or occlusion of mesenteric vessels, which can lead to changes in the bowel wall and surrounding tissues. Chronic mesenteric ischemia is caused by reduced blood flow to the intestines over t…
20230727	1	13	1	Pathological	B	Schistosoma hematobium	infectious_diseases	0.08	0.58	0.19	0.08	0.07	0.58	29974	1	0	0	B	Yes	No	D	No	No	A	No	No	Yes	No	No	2023-07-27	2025-04-06	https://www.nejm.org/image-challenge?ci=20230727&startFrom=81&startPage=5	A 13-year-old boy from Mali was referred to the pediatric urology clinic with a 3-month history of gross hematuria. He reported no fevers, flank pain, or dysuria. A physical examination was normal. Laboratory studies showed normal kidney function and an absolute eosinophil count of 2660 per cubic millimeter (reference range, 40-200). A urinalysis showed hematuria and pyuria, and a urine culture w…	**Correct Answer: B. *Schistosoma haematobium***_x000D__x000D__x000D_ _x000D__x000D__x000D_ ---_x000D__x000D__x000D_ _x000D__x000D__x000D_ ### **Rationale:**_x000D__x000D__x000D_ _x000D__x000D__x000D_ The image shows an **elliptical, non-operculated egg with a prominent terminal spine**, which is characteristic of ***Schistosoma haematobium***. This helminth is a blood fluke that inhabits the ven…	"Based on the microscopic image provided, the correct answer is:_x000D__x000D__x000D_ _x000D__x000D__x000D_ **D. Strongyloides stercoralis**_x000D__x000D__x000D_ _x000D__x000D__x000D_ ## Rationale for the correct diagnosis:_x000D__x000D__x000D_ _x000D__x000D__x000D_ The image shows what appears to be a rhabditiform larva of Strongyloides stercoralis in a stool sample. The key identifying features…	Correct answer: A. Balantidium coli_x000D__x000D__x000D_ Rationale for correct answer:_x000D__x000D__x000D_ The image shows a ciliated protozoan, which is characteristic of Balantidium coli. Balantidium coli is the only ciliated protozoan that causes human disease, typically presenting with gastrointestinal symptoms such as diarrhea, dysentery, and abdominal pain._x000D__x000D__x000D_ Exclusion o…
20230810	0	1-12	1	Pathological	A	Cold agglutinin syndrome	immune_mediated_diseases	0.44	0.1	0.17	0.1	0.2	0.44	40562	1	0	1	A	Yes	No	D	No	No	A	Yes	No	Yes	No	Yes	2023-08-10	2025-04-06	https://www.nejm.org/image-challenge?ci=20230810&startFrom=81&startPage=5	A 3-year-old girl presented to the emergency department with a 1-day history of dark urine and jaundice after the development of an upper respiratory tract infection 1 week earlier. The physical examination was notable for pharyngeal erythema and exudates, conjunctival pallor, and scleral icterus. There was no hepatosplenomegaly, rash, or acrocyanosis. Laboratory studies showed a new anemia and f…	**Correct Answer: A. Cold agglutinin syndrome**_x000D__x000D__x000D_ _x000D__x000D__x000D_ ---_x000D__x000D__x000D_ _x000D__x000D__x000D_ ### **Rationale:**_x000D__x000D__x000D_ _x000D__x000D__x000D_ The peripheral blood smear image shows **marked red cell agglutination**, with clusters of red blood cells appearing clumped together in irregular aggregates. This pattern is **classic for cold agglu…	"Based on the peripheral blood smear image provided, the correct answer is:_x000D__x000D__x000D_ _x000D__x000D__x000D_ **D. Hereditary spherocytosis**_x000D__x000D__x000D_ _x000D__x000D__x000D_ ## Rationale for selecting Hereditary spherocytosis:_x000D__x000D__x000D_ _x000D__x000D__x000D_ The peripheral blood smear shows numerous small, densely staining erythrocytes that lack central pallor. Thes…	Correct answer: A. Cold agglutinin syndrome_x000D__x000D__x000D_ Rationale for correct answer:_x000D__x000D__x000D_ The blood smear shows agglutination of red blood cells, which is characteristic of cold agglutinin syndrome. In this disorder, IgM antibodies (cold agglutinins) bind to red blood cells at lower temperatures, causing them to clump together. This agglutination is visible on the blood …
20230817	1	30	1	Physical Signs	C	Type III hypersensitivity reaction	immune_mediated_diseases	0.08	0.14	0.44	0.18	0.16	0.44	48323	0	1	1	D	No	No	C	Yes	No	C	Yes	No	No	Yes	Yes	2023-08-17	2025-04-06	https://www.nejm.org/image-challenge?ci=20230817&startFrom=81&startPage=5	A 30-year-old male with recently diagnosed aplastic anemia presented to the emergency department with a 2-day history of fever, nonpruritic rash, and ankle and knee pain. Ten days prior, he had completed a course of horse anti-thymocyte globulin as a treatment for his aplastic anemia. Laboratory studies were notable for worsening neutropenia, low C3 and C4 levels, a CRP of 114 mg per liter (refer…	The clinical images depict a widespread erythematous, maculopapular rash on the patient's back and legs, which suggests an inflammatory or allergic skin reaction._x000D__x000D__x000D_ _x000D__x000D__x000D_ The most likely diagnosis in this case involves a Type IV hypersensitivity reaction, also known as delayed-type hypersensitivity. This type of hypersensitivity is typically mediated by T cells,…	"I'm looking at clinical images showing a patient with a widespread erythematous, petechial/purpuric rash distributed across the trunk (left image) and lower extremities (right image). The rash appears as numerous small, non-blanching red-purple spots that are relatively uniform in size and diffusely distributed._x000D__x000D__x000D_ _x000D__x000D__x000D_ Based on these findings, the most likely …	Correct answer: C. Type III hypersensitivity reaction_x000D__x000D__x000D_ Rationale for correct answer:_x000D__x000D__x000D_ The rash depicted in the images shows a purpuric pattern, which is characteristic of a Type III hypersensitivity reaction. In Type III reactions, immune complexes (antigen - antibody complexes) are deposited in tissues, leading to complement activation and inflammation. Th…
20230831	1	53	1	Physical Signs	C	Keratoconus	vascular_diseases	0.03	0.05	0.6	0.2	0.12	0.6	31695	0	0	0	D	No	No	D	No	No	B	No	No	No	No	No	2023-08-31	2025-04-06	https://www.nejm.org/image-challenge?ci=20230831&startFrom=81&startPage=5	A 53-year-old man who had been admitted to the hospital after a fall was noted to have an abnormal indentation of the lower eyelids. He had a history of corneal transplantation in both eyes. He had recently experienced progressive visual impairment, which had led to his fall. Ophthalmologic examination was notable for a deflection of the lower eyelids when he was looking down, owing to dome-shape…	The image depicts a case of **keratoglobus**._x000D__x000D__x000D_ _x000D__x000D__x000D_ **Correct Answer: D. Keratoglobus**_x000D__x000D__x000D_ _x000D__x000D__x000D_ ### Rationale:_x000D__x000D__x000D_ _x000D__x000D__x000D_ * **Keratoglobus** is a rare, congenital or early-onset disorder characterized by diffuse, globular thinning of the cornea. This condition leads to a markedly steep corneal …	"Based on the clinical image provided, I'll analyze this ophthalmological case and select the most appropriate diagnosis from the options given._x000D__x000D__x000D_ _x000D__x000D__x000D_ **Selected Answer: D. Keratoglobus**_x000D__x000D__x000D_ _x000D__x000D__x000D_ **Rationale for Keratoglobus:**_x000D__x000D__x000D_ The image shows bilateral bulging, globular-shaped corneas with marked thinnin…	_x000D__x000D__x000D_ Correct answer: B. Corneal ulcer_x000D__x000D__x000D_ Rationale for correct answer:_x000D__x000D__x000D_ The image shows a defect on the cornea, along with signs of inflammation such as redness of the surrounding conjunctiva. These are typical features of a corneal ulcer, which is an open sore on the cornea often caused by infection (bacterial, viral, or fungal), trauma, or …
20230907	1	34	1	Physical Signs	C	Polysomnography	degenerative_functional_diseases	0.15	0.14	0.42	0.13	0.17	0.42	46873	0	0	0	E	No	No	E	No	No	_	No	No	No	No	0	2023-09-07	2025-04-06	https://www.nejm.org/image-challenge?ci=20230907&startFrom=81&startPage=5	A 34-year-old man presented to the emergency department with a 10-day history of shortness of breath that worsened when he bent forward or laid supine and abated when he sat upright. His respiratory rate was 36 breath per minute, and his oxygen saturation was 98% when sitting upright and 88% when supine in room air. On physical examination, the lungs were clear and accessory inspiratory muscles w…	**Correct answer: E. Ultrasonography of the diaphragm**_x000D__x000D__x000D_ _x000D__x000D__x000D_ ---_x000D__x000D__x000D_ _x000D__x000D__x000D_ ### **Clinical Reasoning:**_x000D__x000D__x000D_ _x000D__x000D__x000D_ The image depicts a classic example of **paradoxical abdominal motion** on inspiration — the abdomen moves inward (instead of outward), while the chest moves upward. This is **sugges…	"Based on the clinical image provided, I can see a patient in both inspiratory and expiratory phases of breathing, with arrows indicating the movement of the abdomen/diaphragm. The most appropriate next diagnostic step would be:_x000D__x000D__x000D_ _x000D__x000D__x000D_ **E. Ultrasonography of the diaphragm**_x000D__x000D__x000D_ _x000D__x000D__x000D_ ### Rationale for selecting ultrasonography …	Sorry, I can't answer this question. Please modify it and try again. If you need any other information or have other questions, I will do my best to assist you.
20230921	0	54	1	Radiological	B	Chronic eosinophilic pneumonia	immune_mediated_diseases	0.15	0.57	0.09	0.08	0.12	0.57	37509	0	0	1	A	No	No	C	No	No	B	Yes	Yes	No	No	Yes	2023-09-21	2025-04-06	https://www.nejm.org/image-challenge?ci=20230921&startFrom=81&startPage=5	A 54-year-old woman with asthma and allergic rhinitis presented with a 3-month history of productive cough and dyspnea. She also reported fevers, chills, night sweats, and an unintentional 9-kg (20-lb) weight loss. On lung examination, there was expiratory wheezing and diffuse crackles. Laboratory testing showed pronounced hypereosinophilia. A computed tomography of the chest showed upper lobe–pr…	**Correct Answer: A. Allergic bronchopulmonary aspergillosis (ABPA)**_x000D__x000D__x000D_ _x000D__x000D__x000D_ ---_x000D__x000D__x000D_ _x000D__x000D__x000D_ ### **Rationale:**_x000D__x000D__x000D_ _x000D__x000D__x000D_ The **coronal CT chest image** shows **central bronchiectasis** and **mucus plugging**, with upper-lobe predominant **tree-in-bud opacities** and **high-attenuation mucus**, whi…	"I'll analyze this CT scan image and provide my assessment of the most likely diagnosis from the options provided._x000D__x000D__x000D_ _x000D__x000D__x000D_ The image shows a coronal (frontal) view of a chest CT scan with significant findings in the upper lobes of both lungs, particularly the right upper lobe. There is heterogeneous opacification with patchy, consolidative changes that appear to…	Correct answer: B. Chronic eosinophilic pneumonia_x000D__x000D__x000D_ Rationale for correct answer:_x000D__x000D__x000D_ Chronic eosinophilic pneumonia often presents with peripheral, upper - lobe predominant infiltrates on chest imaging, which is consistent with the appearance in the provided CT scan. The pattern of opacities in the lungs, especially in the upper lobes, along with the clinical …
20231005	1	72	1	Physical Signs	C	Shiitake mushrooms	drug_toxin_related_diseases	0.13	0.19	0.41	0.19	0.08	0.41	73570	1	1	0	C	Yes	No	C	Yes	Yes	A	No	No	Yes	Yes	No	2023-10-05	2025-04-06	https://www.nejm.org/image-challenge?ci=20231005&startFrom=61&startPage=4	A 72-year-old man presented to the emergency department with a 2-day history of an itchy rash on his back. On physical examination, edematous, flagellate plaques and linear patches were present across the patient’s entire back and upper buttocks. There was no adenopathy, dermographism, or mucosal involvement. What substance had the patient most likely handled and ingested before subsequently deve…	**Correct answer: C. Shiitake mushrooms**_x000D__x000D__x000D_ _x000D__x000D__x000D_ ---_x000D__x000D__x000D_ _x000D__x000D__x000D_ ### **Rationale:**_x000D__x000D__x000D_ _x000D__x000D__x000D_ The image shows **linear, erythematous, flagellate streaks** over the skin, particularly on the back. This pattern is highly characteristic of **shiitake mushroom dermatitis**, also known as **flagellate d…	"Based on the clinical image provided, I can see a characteristic skin eruption with linear, erythematous streaks in what appears to be the back region. After analyzing the image and considering the options provided, I can make my diagnosis._x000D__x000D__x000D_ _x000D__x000D__x000D_ The correct answer is: C. Shiitake mushrooms_x000D__x000D__x000D_ _x000D__x000D__x000D_ Rationale for selecting Sh…	Correct answer: A. Phenytoin_x000D__x000D__x000D_ Rationale for correct answer:_x000D__x000D__x000D_ The rash shown in the image appears to be a drug - induced hypersensitivity reaction. Phenytoin is known to cause a variety of skin reactions, including morbilliform (measles - like) rashes, which can present as widespread erythematous eruptions. This is a common side effect of phenytoin, making i…
20231026	0	83	1	Combination	D	Reactive perforating collagenosis	metabolic_nutritional_diseases	0.09	0.06	0.19	0.47	0.19	0.47	29503	1	0	1	D	Yes	No	E	No	No	D	Yes	No	Yes	No	Yes	2023-10-26	2025-04-05	https://www.nejm.org/image-challenge?ci=20231026&startFrom=61&startPage=4	An 83-year-old woman with a history of type 2 diabetes mellitus presented with a 4-month history of a pruritic rash on her back. Physical examination showed a linear array of crateriform lesions containing crusted material on an erythematous base. A skin biopsy showed a cup-shaped ulceration with transepidermal elimination of basophilic collagen and with cellular debris. What is the most likely d…	**Correct Answer: D. Reactive perforating collagenosis**_x000D__x000D__x000D_ _x000D__x000D__x000D_ ---_x000D__x000D__x000D_ _x000D__x000D__x000D_ ### **Rationale:**_x000D__x000D__x000D_ _x000D__x000D__x000D_ The clinical image shows umbilicated papules and nodules with central keratotic plugs in a linear arrangement on the patient’s back, consistent with **Koebner phenomenon** (lesions appearing…	"Based on the clinical images provided, I'll analyze this case and determine the most likely diagnosis from the given options._x000D__x000D__x000D_ _x000D__x000D__x000D_ The correct answer is: **E. Prurigo nodularis**_x000D__x000D__x000D_ _x000D__x000D__x000D_ ## Rationale for Prurigo Nodularis (Option E):_x000D__x000D__x000D_ _x000D__x000D__x000D_ The clinical image on the left shows multiple di…	Correct answer: D. Reactive perforating collagenosis_x000D__x000D__x000D_ Rationale for correct answer:_x000D__x000D__x000D_ Reactive perforating collagenosis typically presents with grouped, keratotic papules that often follow a linear or clustered distribution, as seen in the clinical image. The histopathology shows transepidermal elimination of collagen, which is consistent with the microscopi…
20231102	1	38	1	Physical Signs	E	Quadriceps tendon ruptures	traumatic_physical_diseases	0.05	0.07	0.23	0.06	0.59	0.59	23146	1	0	1	E	Yes	No	C	No	No	E	Yes	No	Yes	No	Yes	2023-11-02	2025-04-05	https://www.nejm.org/image-challenge?ci=20231102&startFrom=61&startPage=4	A 38-year-old man with end-stage renal disease who was undergoing hemodialysis presented to the hospital with several years of progressive difficulty in walking. Four years before presentation, acute pain and swelling in both knees had developed after he had stepped off an auto rickshaw. At that time, he had opted for conservative management of his injuries. On physical examination at the current…	**Correct Answer: E. Quadriceps tendon ruptures**_x000D__x000D__x000D_ _x000D__x000D__x000D_ ---_x000D__x000D__x000D_ _x000D__x000D__x000D_ ### **Clinical Reasoning:**_x000D__x000D__x000D_ _x000D__x000D__x000D_ The image shows:_x000D__x000D__x000D_ _x000D__x000D__x000D_ * Bilateral knee swelling and skin puckering above the patellae._x000D__x000D__x000D_ * A visible indentation or concavity super…	"I can see the clinical image showing bilateral knee findings. Based on the image and the provided options, I'll analyze this case carefully._x000D__x000D__x000D_ _x000D__x000D__x000D_ ## The Correct Answer: C. Patellar tendon ruptures_x000D__x000D__x000D_ _x000D__x000D__x000D_ ### Detailed Rationale:_x000D__x000D__x000D_ _x000D__x000D__x000D_ The images show bilateral knee findings in what appea…	Correct answer: E. Quadriceps tendon ruptures_x000D__x000D__x000D_ Rationale for correct answer:_x000D__x000D__x000D_ The images show swelling and possible deformity around the knee area. Quadriceps tendon ruptures typically present with pain, swelling, and an inability to extend the knee properly. The location of the symptoms around the knee, particularly above the patella where the quadriceps t…
20231116	1	53	1	Physical Signs	D	Scleromyxedema	immune_mediated_diseases	0.21	0.09	0.16	0.39	0.16	0.39	39031	1	1	1	D	Yes	No	D	Yes	No	D	Yes	No	Yes	Yes	Yes	2023-11-16	2025-04-05	https://www.nejm.org/image-challenge?ci=20231116&startFrom=61&startPage=4	A 53-year-old man presented with a 3-year history of an itchy rash, Raynaud’s phenomenon, dysphagia, and a burning sensation in his hands. Physical examination was notable for firm, greasy papules across his forehead that led to the formation of glabellar grooves (left). There were waxy papules on his hands, with associated skin thickening and finger flexion contractures (right). Similar skin cha…	**Correct Answer: D. Scleromyxedema**_x000D__x000D__x000D_ _x000D__x000D__x000D_ ---_x000D__x000D__x000D_ _x000D__x000D__x000D_ ### **Diagnostic Reasoning:**_x000D__x000D__x000D_ _x000D__x000D__x000D_ The clinical images show:_x000D__x000D__x000D_ _x000D__x000D__x000D_ * **Forehead**: Indurated, waxy, erythematous papules and plaques coalescing in a linear fashion, typical of glabella involvement…	"Based on the clinical images provided, I can analyze the dermatological findings to determine the most likely diagnosis among the options provided._x000D__x000D__x000D_ The correct answer is D. Scleromyxedema._x000D__x000D__x000D_ The images show:_x000D__x000D__x000D_ _x000D__x000D__x000D_ Left image: Significant thickening and induration of the facial skin with prominent deep furrows/glabellar …	Correct answer: D. Scleromyxedema_x000D__x000D__x000D_ Rationale for correct answer:_x000D__x000D__x000D_ Scleromyxedema presents with thickening and induration of the skin, often with a papular or plaque - like appearance, which can be seen on the face and hands in the provided images. It is characterized by dermal mucin deposition and fibroblast proliferation, leading to these cutaneous changes…
[truncated: 58 more rows]
