# Supplementary material for: Comparison of Multimodal Large Language Models and Physicians for Medical Diagnosis Using NEJM Image Challenge Cases: Cross-sectional Study
Source: Research Square preprint supplement (doi:10.21203/rs.3.rs-7175790/v1), 2025-09-01
Supplement: Supplementary file 2 [file 1cf717e8bbdf8a2dfa12c6cf.docx]

**Prompt**

You are an experienced clinician with expertise in diagnosing and managing rare diseases. Below is a clinical case report published in the New England Journal of Medicine (NEJM), including patient history and/or relevant clinical images (such as physical examination findings, imaging studies, pathology slides, endoscopic images, or electrocardiograms). Please carefully review this information and address the diagnostic or therapeutic question provided.

In your response, please:

Select the answer from the five options (A, B, C, D, E).

Provide a detailed rationale supporting your choice of diagnosis or therapeutic approach.

Briefly explain why the other provided options were excluded.

Ensure your analysis is logical and evidence based.
