# Supplementary material for: Comparison of Multimodal Large Language Models and Physicians for Medical Diagnosis Using NEJM Image Challenge Cases: Cross-sectional Study
Source: Research Square preprint supplement (doi:10.21203/rs.3.rs-7175790/v1), 2025-09-01
Supplement: Supplementary file 3 [file ab1f0362f3d7d512395dfe00.docx]

***Supplementary 2***

**Cases from Correct to wrong**

**1.Patient ID: 2021007**

**URL**

[**https://www.nejm.org/imagechallenge?ci=20211007&startFrom=181&startPage=10**](https://www.nejm.org/image-challenge?ci=20211007&startFrom=181&startPage=10)

**Photoonly ChatGPT 4o**

Correct Answer: C. Nocardiosis

Rationale:

The provided clinical images strongly support the diagnosis of Nocardiosis, especially Nocardia brain abscess:

Image Interpretation:

1. Left Image (MRI Brain):

T1weighted postcontrast coronal MRI shows multiple ringenhancing lesions, predominantly in the cerebral hemispheres and cerebellum, with surrounding vasogenic edema.

This pattern is classic for brain abscesses or disseminated infection, particularly in immunocompromised patients.

2. Right Image (Microscopy):

High magnification showing filamentous, branching, weakly acidfast bacteria, which is highly characteristic of Nocardia species.

Nocardia appears as grampositive, branching filaments that can be stained with modified acidfast stains (e.g., FiteFaraco).

Why Nocardiosis is Correct:

Nocardia is a soilborne, aerobic actinomycete that can cause pulmonary, CNS, or disseminated disease, often in immunocompromised hosts (e.g., transplant patients, corticosteroid use).

It classically produces multiple ringenhancing brain lesions.

On histopathology, the branching, filamentous appearance is a giveaway, along with partial acidfastness.

Why the Other Options Are Incorrect:

A. Clostridium septicum:

Anaerobic, sporeforming bacillus; typically causes gas gangrene and associated with colon cancer.

Does not produce branching filaments, and CNS involvement is rare.

Appears as large grampositive rods, not consistent with the right image.

B. Listeriosis:

Caused by *Listeria monocytogenes*, a grampositive rod.

Can cause meningoencephalitis, particularly in neonates, elderly, or immunocompromised.

However, Listeria does not produce branching, filamentous organisms.

D. Peptostreptococcus species:

Anaerobic grampositive cocci.

Can cause brain abscesses, especially polymicrobial ones.

Does not appear filamentous under the microscope.

E. Propionibacterium acnes (Cutibacterium acnes):

Anaerobic grampositive rod.

Often a contaminant in CNS shunt infections.

Morphology is not filamentous; lacks the distinct branching seen in Nocardia.

Conclusion:

The imaging pattern (multiple ringenhancing CNS lesions) in conjunction with the filamentous, branching, weakly acidfast bacteria on microscopy is diagnostic of Nocardiosis.

✅ Correct answer: C. Nocardiosis.

**Photo+text ChatGPT 4o**

Correct Answer: B. Listeriosis


 Clinical Summary:
 Patient: 80yearold man with multiple myeloma (immunocompromised)
 Symptoms: Fever and confusion (suggestive of CNS infection)
 MRI: Ringenhancing brain lesions
 CSF Gram Stain: Grampositive bacilli

Rationale:

 MRI Findings:
 Ringenhancing lesions in the brain suggest abscesses or meningoencephalitis.
 These can be caused by a variety of organisms, but in the elderly and immunocompromised, certain pathogens are more likely.

 Gram Stain:
 Grampositive bacilli in the CSF strongly suggest:
 Listeria monocytogenes
 Clostridium species
 Nocardia (can be weakly grampositive and branching)
 Propionibacterium acnes (usually contaminant)

 Listeria monocytogenes:
 A facultative intracellular, grampositive bacillus.
 Commonly affects:
 Neonates
 Pregnant women
 Elderly
 Immunocompromised hosts (e.g., patients with hematologic malignancies like multiple myeloma)
 Can cause:
 Meningitis
 Encephalitis
 Brain abscesses, particularly ringenhancing lesions
 This patient’s clinical picture and age fit this exactly.


 Why the Other Options Are Incorrect:

 A. Clostridium septicum:
 Causes gas gangrene and is associated with colonic malignancy, not multiple myeloma.
 CNS infection is rare.
 Imaging would likely show gas formation, which is absent here.

 C. Nocardiosis:
 Causes ringenhancing brain lesions, especially in immunocompromised hosts.
 But gram stain shows branching, filamentous rods, and usually partially acidfast.
 The provided gram stain lacks filamentous morphology, arguing against Nocardia.

 D. Peptostreptococcus species:
 Anaerobic grampositive cocci, not bacilli.
 Morphology and gram stain inconsistent.

 E. Propionibacterium acnes (Cutibacterium acnes):
 Anaerobic grampositive bacillus.
 Usually a contaminant in CSF or shunt infections.
 Rarely causes brain abscesses, and almost never in acute presentation with fever and confusion.


 Conclusion:
In an elderly immunocompromised patient with fever, confusion, ringenhancing CNS lesions, and grampositive bacilli in CSF, Listeria monocytogenes is the most likely diagnosis.

✅ Correct Answer: B. Listeriosis.

**Photoonly Claude 3.7**

Thank you for sharing the case materials. Based on the images provided, I can now analyze this clinical case.

The images show:

1. A coronal MRI of the brain showing multiple small lesions (likely abscesses) in the cerebral cortex

2. A microscopic image showing thin, branching, filamentous bacteria with red staining (likely acidfast or partially acidfast)

Answer: C. Nocardiosis

Rationale for Nocardiosis:

The MRI shows multiple brain abscesses, which is consistent with disseminated nocardiosis

The microscopic image shows characteristic thin, branching, filamentous bacteria which are typical of Nocardia species

Nocardia are partially acidfast bacteria that typically stain red with modified acidfast stains

Nocardia has a strong predilection for the central nervous system, especially in immunocompromised patients

The pattern of multiple small abscesses rather than a single large abscess is consistent with hematogenous spread from a primary site (often pulmonary) to the CNS, which is typical for nocardiosis

Why the other options were excluded:

A. Clostridium septicum:

Clostridium species are large grampositive rods, not filamentous or branching

C. septicum typically causes gas gangrene, myonecrosis, or septicemia rather than CNS abscesses

The image doesn't show the characteristic grampositive rods of Clostridium

B. Listeriosis:

Listeria monocytogenes appears as small grampositive rods or coccobacilli, not as branching filaments

While Listeria can cause CNS infections, it typically causes meningitis or meningoencephalitis rather than multiple discrete abscesses

The microscopic appearance is not consistent with Listeria

D. Peptostreptococcus species:

These are anaerobic grampositive cocci, not filamentous bacteria

The microscopic image clearly shows filamentous, branching organisms, not cocci

Peptostreptococcus rarely causes brain abscesses as a single pathogen

E. Propionibacterium acnes:

P. acnes is a grampositive, nonsporeforming, anaerobic rod

It does not typically present with the branching, filamentous morphology seen in the microscopic image

While P. acnes can occasionally cause brain abscesses, these are usually associated with neurosurgical procedures or implants, and the pattern would be different

The combination of multiple brain abscesses on MRI and the characteristic microscopic appearance of thin, branching, filamentous bacteria strongly supports the diagnosis of Nocardiosis (option C).

**Photo+text Claude 3.7**

Thank you for providing the additional clinical context. With this information, I can now provide a more complete analysis.

 Answer: B. Listeriosis

 Rationale for Listeriosis:
 The patient is 80 years old with multiple myeloma undergoing treatment, indicating significant immunosuppression
 The clinical presentation includes fevers and confusion, which are classic for Listeria meningoencephalitis
 The Gram stain of CSF showed grampositive bacilli, consistent with Listeria monocytogenes
 The MRI shows ringenhancing lesions, which can occur with Listeria brain abscesses or cerebritis
 Listeria has a strong predilection for the CNS in immunocompromised patients, particularly those with hematologic malignancies
 Elderly patients and those receiving immunosuppressive therapy for multiple myeloma are at particularly high risk for listeriosis

 Why the other options were excluded:

A. Clostridium septicum:
 While Clostridium is grampositive, it is unusual to find it in CSF
 C. septicum typically causes gas gangrene and myonecrosis rather than CNS infections
 It would be extremely rare to cause ringenhancing lesions in the brain without evidence of gas formation

C. Nocardiosis:
 While the microscopic image shows filamentous structures that could resemble Nocardia, the Gram stain finding of "grampositive bacilli" is more consistent with Listeria
 Nocardia would typically be described as "partially acidfast, branching filaments" rather than grampositive bacilli
 Nocardia infections often involve the lungs before disseminating to the brain, which wasn't mentioned in this case

D. Peptostreptococcus species:
 These are grampositive cocci, not bacilli as described in the CSF Gram stain
 They typically cause abscesses as part of polymicrobial infections, not as a single pathogen in meningitis
 They would be unusual as a cause of multiple ringenhancing lesions in an immunocompromised host

E. Propionibacterium acnes:
 While P. acnes is a grampositive rod, it is an uncommon cause of meningitis
 P. acnes CNS infections are typically associated with neurosurgical procedures or shunts, which weren't mentioned
 The acute presentation with fever and confusion is not typical for the indolent course of P. acnes infections

Given the elderly immunocompromised patient with multiple myeloma, presenting with fever and confusion, ringenhancing lesions on MRI, and grampositive bacilli in the CSF, Listeria monocytogenes (option B) is the most likely diagnosis.

-------------------------------------------------------------------------------------------------------

**2.Patient ID: 20191205**

**URL**

[https://www.nejm.org/imagechallenge?ci=20191205&startFrom=261&startPage=14](https://www.nejm.org/image-challenge?ci=20191205&startFrom=261&startPage=14)

**Photoonly ChatGPT 4o**

Correct Answer: A. Hydrocolpos
 Diagnosis and Rationale:
The image shows a newborn or infant with a bulging, cystic mass protruding from the vaginal introitus, which is smooth, midline, and has a yellowish hue, suggesting fluid accumulation behind an obstruction. This is classic for hydrocolpos, which refers to the accumulation of vaginal secretions behind an imperforate hymen or other vaginal outflow obstruction, typically due to maternal estrogen stimulation.
Hydrocolpos can be part of a spectrum ranging from simple imperforate hymen to more complex congenital anomalies. It is more commonly detected in neonates or infants and presents with a bulging mass, often confused with other genital masses.
 Why the Other Options Are Incorrect:
* B. Prolapsed uterus:
 Uterine prolapse is extremely rare in neonates and would typically not present as a smooth cystic bulge but as protrusion of a firm, more structured mass. It’s mostly seen in older females or associated with severe pelvic floor trauma or congenital defects.

* C. Interlabial cyst:
 While interlabial cysts (e.g., Gartner duct cysts) can be seen in neonates, they are generally smaller, well circumscribed, and do not cause significant bulging or obstruction as seen in this image.

* D. McKusickKaufman syndrome:
 This syndrome can include hydrocolpos, but the syndrome itself is a triad of hydrometrocolpos, postaxial polydactyly, and congenital heart disease. Diagnosis of the syndrome would require systemic findings not evident in this isolated image. Thus, while hydrocolpos may be *part of* the syndrome, the specific image supports hydrocolpos alone, not the full syndrome.

* E. Rhabdomyosarcoma:
 Vaginal rhabdomyosarcoma (especially embryonal type) may present as a "grapelike" polypoid mass (sarcoma botryoides) protruding through the vaginal opening in infants and toddlers. However, this mass is not polypoid or irregular; it is smooth and fluidfilled, inconsistent with a tumor.
 Conclusion:
The smooth, cystic, midline protrusion through the vaginal introitus in a neonate is diagnostic of hydrocolpos due to obstruction of vaginal outflow—most commonly imperforate hymen.
Would you like a diagram or ultrasound correlate of hydrocolpos for comparison?

**Photo+text ChatGPT 4o**

Correct Answer: B. Prolapsed uterus
 Diagnosis and Rationale:
The image and description support the diagnosis of uterine prolapse in a neonate, which, though rare, is known to occur and presents as:
* A soft, midline mass protruding from the vaginal introitus
* Often seen in the neonatal period, particularly in preterm infants
* The increase in size with crying suggests a pressurerelated exacerbation, which is characteristic of a prolapse rather than a static cystic mass
Uterine prolapse in neonates may be due to congenital weakness of pelvic support structures or birth trauma (e.g., rapid or difficult delivery), especially in preterm infants with underdeveloped pelvic musculature.
 Why the Other Options Are Incorrect:
* A. Hydrocolpos:
 Typically presents as a bulging hymenal membrane due to vaginal fluid accumulation behind an imperforate hymen. The mass is tense and cystic, not soft, and does not change in size with crying. The image lacks the classic bulging bluish hymenal membrane.
* C. Interlabial cyst:
 Generally small, wellcircumscribed, and nondynamic. These do not protrude as prominently and do not change in size with intraabdominal pressure.
* D. McKusickKaufman syndrome:
 This syndrome includes hydrocolpos as a feature but would not present solely as a prolapsing soft mass with dynamic changes. Also requires postaxial polydactyly and congenital heart disease for diagnosis.
* E. Rhabdomyosarcoma:
 Presents with a "grapelike" (botryoid) mass protruding from the vaginal introitus, usually firm and polypoid, not soft or pressuresensitive, and typically arises in older infants or toddlers, not in the first day of life.
 Conclusion:
The soft, reducible mass increasing in size with crying in a preterm neonate is characteristic of a prolapsed uterus, making Option B the correct diagnosis.
Would you like comparative clinical images or a management summary for neonatal uterine prolapse?

**Photoonly Claude 3.7**

Based on the provided image, I can see what appears to be a protrusion or mass in the genital area, likely of an infant or young child. I'll analyze each potential diagnosis and provide my assessment.
The correct answer is: A. Hydrocolpos
Rationale for selecting Hydrocolpos:
Hydrocolpos refers to the distension of the vagina with fluid (typically mucus or fluid secretions) due to an obstruction, most commonly from an imperforate hymen. The image shows a bulging, yellowishwhite structure visible between the labia, which is characteristic of hydrocolpos. This finding typically presents as a midline bulge or protrusion at the introitus that has a smooth, tense appearance with a yellowish tint due to the accumulated fluid behind the imperforate hymen.
Reasons for excluding other options:
B. Prolapsed uterus:
 Extremely rare in infants and young children
 Would typically appear as pink or reddish tissue rather than the yellowishwhite appearance seen in the image
 Would show a more irregular surface with identifiable cervical os
 The contour and color in the image are inconsistent with uterine tissue
C. Interlabial cyst:
 Typically smaller and more discrete than the bulging seen here
 Would not typically occupy the entire introitus as shown in the image
 Usually appears more translucent and spherical
 The image shows a distended structure that appears to be the hymen bulging with accumulated fluid behind it
D. McKusickKaufman syndrome:
 This is a syndromic diagnosis characterized by hydrometrocolpos, postaxial polydactyly, and congenital heart defects
 While hydrometrocolpos can be a component of this syndrome, the image alone shows only the genital finding without evidence of the other syndromic features
 This would be a differential diagnosis to consider if other features were present, but not the most specific answer based solely on the image
E. Rhabdomyosarcoma:
 Would typically present as a grapelike (botryoid) mass with an irregular surface
 Often has areas of hemorrhage or necrosis giving it a more heterogeneous appearance
 Usually appears more solid and fleshy rather than the smooth, fluidfilled appearance seen here
 The yellowishwhite, smooth appearance in the image is inconsistent with the typical appearance of a malignant tumor
Management of hydrocolpos typically involves surgical intervention with hymenotomy to release the accumulated fluid and establish normal outflow.

**Photo+text Claude 3.7**

Based on the clinical image and the additional history provided, the correct answer is:
A. Hydrocolpos
Rationale for selecting Hydrocolpos:
This image shows a yellowish, bulging structure visible between the labia of a 1dayold female infant. Hydrocolpos is the distension of the vagina with accumulated secretions (typically mucus) due to an obstruction, most commonly an imperforate hymen. Key supporting features include:
1. The teardrop or ovalshaped bulging structure with a smooth, tense appearance
2. The yellowishwhite coloration characteristic of accumulated vaginal secretions behind an imperforate hymen
3. The noted increase in size when the infant cries (increased intraabdominal pressure)
4. The timing of presentation (newborn period)
5. The otherwise normal physical examination, suggesting an isolated finding
Reasons for excluding other options:
B. Prolapsed uterus:
 Extremely rare in neonates
 Would appear as pink or reddish mucosal tissue rather than yellowishwhite
 Would typically show a visible cervical os
 Would not typically have the smooth, fluidfilled appearance seen in this image
C. Interlabial cyst:
 Usually smaller, more discrete, and wellcircumscribed
 Would not typically increase in size with crying
 Often appears more translucent
 Doesn't typically occupy the entire introital opening as seen here
D. McKusickKaufman syndrome:
 While this syndrome includes hydrometrocolpos as a feature, the diagnosis requires additional findings such as postaxial polydactyly and congenital heart defects
 The history specifically states the physical examination was otherwise normal
 The image alone shows an isolated genital finding without other syndromic features
E. Rhabdomyosarcoma:
 Extremely rare in neonates
 Typically presents as a grapelike (botryoid) mass with irregular surface
 Would appear more solid, fleshy, and vascular rather than smooth and fluidfilled
 Would not typically increase in size with crying
 Would often have areas of hemorrhage or necrosis giving it a heterogeneous appearance
Management typically involves a simple hymenotomy to relieve the obstruction and establish normal outflow. This is generally curative, though patients should be followed to ensure the opening remains patent.

-------------------------------------------------------------------------------------------------------

**3.Patient ID: 20200206**

**URL**

[https://www.nejm.org/imagechallenge?ci=20200206&startFrom=261&startPage=14](https://www.nejm.org/image-challenge?ci=20200206&startFrom=261&startPage=14)

**Photoonly ChatGPT 4o**

Correct answer: A. Sublingual epidermoid cyst
 Diagnostic reasoning:
The provided CT images (axial and sagittal views) show a wellcircumscribed, nonenhancing, lowattenuation, unilocular midline cystic lesion in the floor of the mouth, displacing the tongue superiorly. This radiologic appearance is classic for a sublingual dermoid or epidermoid cyst, which commonly occurs in the midline or paramedian floor of the mouth.
* The axial view demonstrates the lesion as a rounded, hypodense (fluidfilled) mass beneath the tongue.
* The sagittal view shows that the lesion causes superior displacement of the tongue and fills the sublingual space, consistent with an epidermoid cyst, a benign developmental lesion.
 Why the other options are incorrect:
B. Carcinoma of the tongue
* Carcinomas typically appear as solid, irregular, enhancing masses, often with invasion into adjacent structures.
* They rarely present as welldefined, fluiddensity cystic lesions, making this choice unlikely.
C. BeckwithWiedemann syndrome
* This is a pediatric overgrowth disorder associated with macroglossia, organomegaly, and embryonal tumors.
* There is no evidence of macroglossia, omphalocele, or hemihyperplasia, nor is the patient a neonate or infant.
D. Diphtheria
* Diphtheria presents acutely with graywhite pharyngeal pseudomembranes, sore throat, and systemic toxicity.
* It is not associated with a wellformed cystic lesion in the floor of the mouth.
E. Tuberculosis of the tongue
* Rare; usually presents as painful ulcers or nodules, not cystic masses.
* No caseating granuloma or systemic signs of tuberculosis are described.
 Conclusion:
The imaging characteristics—midline, cystic, nonenhancing lesion displacing the tongue—strongly support the diagnosis of sublingual epidermoid cyst (dermoid cyst subtype).
Would you like a brief overview of surgical or management considerations for this lesion?

**Photo+text ChatGPT 4o**

Correct answer: A. Sublingual epidermoid cyst
 Clinical and Radiologic Correlation:
This 73yearold woman presents with:
* Progressive speech difficulty over 4 days
* A large, fluctuant, painless swelling in the anterior floor of the mouth
* CT imaging shows a welldefined, nonenhancing, lowattenuation midline cystic mass in the floor of the mouth, causing tongue elevation
These features are classic for a sublingual epidermoid cyst, also termed an epidermoid inclusion cyst or a variant of a dermoid cyst, depending on histology.
Key imaging features supporting this diagnosis:
* Midline, cystic lesion (hypodense on CT) located in the sublingual space
* Smooth borders, no enhancement or solid components
* Displacement of the tongue superiorly without evidence of invasion or soft tissue inflammation
 Why other options are incorrect:
B. Carcinoma of the tongue
* Would present as an irregular, enhancing, infiltrative mass, often associated with pain, possible ulceration, or regional lymphadenopathy—not a painless cystic lesion.
C. BeckwithWiedemann syndrome
* A congenital condition that manifests in infants or young children, not adults. It includes macroglossia, organomegaly, and embryonal tumors. Not relevant to a 73yearold.
D. Diphtheria
* Presents acutely with fever, sore throat, and pseudomembranes in the oropharynx. CT would more likely show pharyngeal soft tissue thickening or edema, not a large midline cyst.
E. Tuberculosis of the tongue*
* Extremely rare. Usually presents with ulcerative or nodular lesions rather than a painless, fluctuant mass. CT would show more infiltrative or granulomatous involvement.
 Conclusion:
This case most consistent with a sublingual epidermoid cyst, a benign cystic lesion of ectodermal origin, which may enlarge slowly and cause compressive symptoms such as speech or swallowing difficulty.
Would you like a brief overview of its surgical management or histopathologic characteristics?

**Photoonly Claude 3.7**

The correct answer is: C. BeckwithWiedemann syndrome
Rationale for selecting C:
The CT images (axial and sagittal views) show a significantly enlarged tongue (macroglossia) that appears to be filling and expanding the oral cavity. The tongue appears homogeneously enlarged rather than showing a focal lesion. This, combined with the patient's presentation of progressively worsening difficulty speaking and the physical examination finding of a "large, fluctuant, painless swelling of the anterior floor of the mouth," is most consistent with BeckwithWiedemann syndrome (BWS).
While BWS is typically a congenital condition diagnosed in infancy, there are rare adult presentations or cases that were undiagnosed earlier in life. The cardinal feature of BWS is macroglossia, which is precisely what these images demonstrate a diffusely enlarged tongue that is causing clinical symptoms due to its size.
Why the other options were excluded:
A. Sublingual epidermoid cyst:
 Epidermoid cysts typically appear as welldefined, encapsulated lesions
 They would present as a discrete mass beneath the tongue, not as diffuse tongue enlargement
 The imaging shows enlargement of the tongue tissue itself, not a separate cystic structure
 Epidermoid cysts would displace the tongue rather than constitute the tongue itself
B. Carcinoma of the tongue:
 Tongue carcinomas typically present as irregular, infiltrative lesions
 They often have heterogeneous enhancement with areas of necrosis
 The borders would be poorly defined with invasion of adjacent structures
 The imaging shows diffuse, homogeneous enlargement without focal masses or ulceration
D. Diphtheria:
 Diphtheria typically presents with pseudomembranous pharyngitis and cervical lymphadenopathy
 It would not cause such significant, diffuse tongue enlargement
 Diphtheria would show inflammatory changes rather than homogeneous enlargement
 The patient's age and clinical presentation are not typical for diphtheria
E. Tuberculosis of the tongue:
 Lingual tuberculosis typically presents as ulcerative or nodular lesions
 It is extremely rare and would not cause diffuse tongue enlargement
 TB lesions usually show focal areas of necrosis or caseous changes
 The homogeneous appearance of the tongue tissue does not support tuberculosis
The diffuse nature of the tongue enlargement, the clinical presentation, and the imaging characteristics strongly support BeckwithWiedemann syndrome (option C) as the most appropriate diagnosis.

**Photo+text Claude 3.7**

Based on the clinical image provided, I'll analyze the possible diagnoses:
 The correct answer is C. Ecthyma gangrenosum
 Rationale for selecting Ecthyma gangrenosum:
The image shows multiple skin lesions with characteristic features of ecthyma gangrenosum: purpuric macules that have evolved into necrotic ulcers with central black eschar surrounded by erythematous halos. The lesions demonstrate the classic "bull'seye" or "target" appearance with:
 Dark necrotic centers (eschars)
 Surrounding areas of erythema and induration
 Multiple lesions at different stages of development
 Relatively painless ulcerations
Ecthyma gangrenosum is typically caused by Pseudomonas aeruginosa bacteremia, especially in immunocompromised patients. It represents a cutaneous manifestation of systemic infection rather than primary skin infection, characterized by bacterial invasion of the media and adventitia of blood vessels, leading to vessel necrosis, hemorrhage, and skin infarction.
 Why the other options were excluded:
A. Polyarteritis nodosa vasculitis
 Typically presents with livedo reticularis, subcutaneous nodules, or palpable purpura
 Lesions are usually more diffuse and don't form the characteristic central necrotic ulcers with eschars
 The welldemarcated necrotic centers seen in the image are not typical for polyarteritis nodosa
B. Lymphoma
 Cutaneous lymphoma usually presents as patches, plaques, papules, or nodules
 Lacks the characteristic necrotic centers with surrounding erythema
 Would not typically present with multiple ulcerative lesions with black eschars
 The distribution pattern in the image is more consistent with hematogenous spread of infection
D. Cutaneous anthrax
 While anthrax can present with a necrotic eschar, it typically begins as a painless papule that progresses to a single vesicle and then a depressed black eschar
 Massive edema surrounding the lesion is characteristic of anthrax but not seen in this image
 Multiple simultaneous lesions as seen here would be unusual for anthrax
E. Brown recluse spider bites
 Typically present as a single lesion at the bite site
 Multiple simultaneous lesions would be extremely unusual
 Classic presentation includes the "red, white, and blue sign" (ischemic center, surrounded by pale area, then erythema)
 The characteristic necrosis develops over 34 days, not simultaneously in multiple areas
The pattern, distribution, and appearance of these multiple necrotic lesions with central eschars are most consistent with ecthyma gangrenosum, which warrants immediate evaluation for underlying Pseudomonas septicemia, especially in an immunocompromised host.

-------------------------------------------------------------------------------------------------------

**4.Patient ID: 20200305**

**URL**

[https://www.nejm.org/imagechallenge?ci=20200305&startFrom=261&startPage=14](https://www.nejm.org/image-challenge?ci=20200305&startFrom=261&startPage=14)

**Photoonly ChatGPT 4o**

Correct Answer: C. Disseminated *Mycobacterium avium–intracellulare* infection
 Rationale:
This is a coronal contrastenhanced CT image of the abdomen showing numerous lowattenuation lesions throughout the liver and spleen, along with lymphadenopathy in the peripancreatic and mesenteric regions. These findings are highly characteristic of disseminated *Mycobacterium avium–intracellulare* complex (MAC) infection, particularly in patients with advanced HIV/AIDS.
Key supporting features:
* Numerous small, lowdensity lesions in the liver and spleen (representing granulomatous involvement).
* Lymphadenopathy, particularly in abdominal and mesenteric regions.
* These findings in the context of immunosuppression (commonly CD4 count <50/μL in HIV patients) are typical of disseminated MAC.
 Why Other Options Are Excluded:
* A. HIVassociated diffuse large Bcell lymphoma
 While DLBCL can involve liver, spleen, and lymph nodes, it typically presents with fewer, larger masses rather than innumerable small granulomatous lesions. Also, lymphoma masses tend to enhance more on imaging.
* B. Wandering spleen
 This refers to a spleen in an abnormal location due to ligamentous laxity and is not characterized by parenchymal lesions or lymphadenopathy.
* D. Chronic hepatitis C coinfection
 Hepatitis C affects the liver but usually does not present with multiple splenic and hepatic lesions or lymphadenopathy on imaging.
* E. Multicentric Castleman’s disease
 Castleman’s can cause lymphadenopathy and sometimes hepatosplenomegaly, but diffuse small lowattenuation lesions in the spleen and liver are not characteristic
 Conclusion:
The constellation of imaging findings — diffuse lowattenuation lesions in liver/spleen and abdominal lymphadenopathy — in an immunocompromised patient (e.g., advanced HIV) is classic for disseminated *Mycobacterium avium–intracellulare* infection.
Would you like a brief overview of treatment strategies for disseminated MAC in HIVpositive patients?

**Photo+text ChatGPT 4o**

Correct Answer: A. HIVassociated diffuse large Bcell lymphoma
 Clinical and Radiologic Rationale:
The patient is a 29yearold man with perinatally acquired HIV, a very low CD4 count (18/mm³), and nonadherence to antiretroviral therapy — placing him at high risk for AIDSrelated malignancies, particularly nonHodgkin lymphoma (NHL), including diffuse large Bcell lymphoma (DLBCL).
CT findings:
* Massive splenomegaly with multifocal infarcts: DLBCL frequently involves the spleen and can result in infarcts due to vascular invasion or congestion from rapid cellular proliferation.
* No signs of a wandering spleen (abnormal location) or simple hepatopathy.
* Abdominal lymphadenopathy may also be present but is less defining than the splenic pathology in this case.
Clinical features supporting lymphoma:
* Night sweats, abdominal pain, and systemic symptoms are constitutional ("B") symptoms seen in lymphoma.
* HIVrelated DLBCL often presents extranodally, including in liver, spleen, or GI tract.
* While his HIV viral load is undetectable, the extremely low CD4 count and immune dysfunction still place him at risk for lymphoproliferative disease.
 Why Other Options Are Excluded:
* B. Wandering spleen
 Would cause splenomegaly due to torsion, but would not produce multifocal infarcts or systemic B symptoms. Also, spleen is not ectopic on CT.
* C. Disseminated *Mycobacterium avium–intracellulare* infection
 This often causes diffuse hepatic and splenic microabscesses, not infarction. Also, MAC rarely causes such massive splenomegaly with infarction.
* D. Chronic hepatitis C coinfection
 Chronic HCV could cause splenomegaly in the setting of portal hypertension or cirrhosis, but does not cause infarcts, systemic B symptoms, or occur with undetectable HIV viral load.
* E. Multicentric Castleman’s disease
 Can occur in HIVpositive patients and cause lymphadenopathy and systemic inflammation, but splenic infarction is not typical, and Castleman’s usually presents with generalized lymphadenopathy and elevated IL6 levels.
 Conclusion:
In an immunocompromised HIVpositive individual with massive splenomegaly and splenic infarctions, HIVassociated diffuse large Bcell lymphoma is the most likely diagnosis. The presentation is consistent with extranodal NHL involving the spleen.
Would you like a review of diagnostic workup or treatment options for HIVassociated lymphoma?

**Photoonly Claude 3.7**

Based on the clinical information and CT image provided, I'll analyze the most likely diagnosis for this 29yearold man with perinatally acquired HIV.
The correct answer is: E. Multicentric Castleman's disease
Rationale for selecting Multicentric Castleman's disease:
This patient presents with several key findings that strongly suggest Multicentric Castleman's disease (MCD):
1. Advanced HIV infection with very low CD4 count (18 cells/mm³)
2. Constitutional symptoms including drenching night sweats
3. Massive splenomegaly with multifocal splenic infarcts visible on CT
4. Abdominal pain and tenderness
MCD is a lymphoproliferative disorder strongly associated with HHV8 infection, particularly in HIVpositive patients. The massive splenomegaly with areas of splenic infarction seen on the CT is characteristic of MCD in HIV patients. The combination of severe constitutional symptoms (drenching night sweats) with massive splenomegaly in a patient with profound immunosuppression is highly suggestive of this diagnosis.
Why the other options were excluded:
A. HIVassociated diffuse large Bcell lymphoma:
While lymphoma is common in HIV patients with low CD4 counts, the image doesn't show discrete mass lesions typical of lymphoma. Additionally, the multifocal splenic infarcts are more consistent with MCD than with lymphoma. Lymphoma typically presents with focal lesions rather than the diffuse splenomegaly with infarcts seen here.
B. Wandering spleen:
Wandering spleen is a congenital or acquired condition where the spleen moves from its normal position due to laxity of supporting ligaments. The CT clearly shows the spleen is massively enlarged but in its normal anatomical position, not displaced or "wandering." This diagnosis doesn't explain the patient's systemic symptoms or splenic infarcts.
C. Disseminated Mycobacterium avium–intracellulare infection:
MAI infection is common in advanced HIV, but typically presents with more diffuse, smaller lesions throughout organs and prominent lymphadenopathy. The massive splenomegaly with infarction pattern is less consistent with MAI. Furthermore, MAI typically occurs when the CD4 count is <50 cells/mm³ with a detectable viral load, whereas this patient has an undetectable viral load.
D. Chronic hepatitis C coinfection:
While hepatitis C coinfection is common in HIV patients and can cause splenomegaly due to portal hypertension, it would not explain the acute presentation with night sweats or the splenic infarcts visible on CT. The splenomegaly from hepatitis C would develop gradually and not cause the focal infarcts seen in the image.
The clinical picture of profound immunosuppression, constitutional symptoms, and massive splenomegaly with infarcts is most consistent with Multicentric Castleman's disease in this HIVpositive patient.

**Photo+text Claude 3.7**

I've reviewed the CT scan image showing the nasal and sinus structures. Based on the radiographic findings, I can provide my diagnosis and rationale.
 Answer: D. Granulomatosis with polyangiitis
 Rationale for Selection
The CT image demonstrates complete destruction/absence of the nasal septum with significant bony erosion, creating what's known as a "saddle nose deformity" in the coronal view. This extensive destruction of the nasal septum with surrounding inflammatory changes is highly characteristic of granulomatosis with polyangiitis (GPA, formerly known as Wegener's granulomatosis). GPA is an ANCAassociated vasculitis that commonly affects the upper respiratory tract, lungs, and kidneys. In the nasal cavity, it causes granulomatous inflammation leading to progressive cartilage and bone destruction, ultimately resulting in septal perforation and collapse.
 Why other options were excluded:
A. Chronic sinusitis While chronic sinusitis can show mucosal thickening and sinus opacification, it typically does not cause the extensive destruction of nasal septal cartilage and bone seen in this image. Chronic sinusitis would show mucosal disease but preserve underlying bone architecture.
B. Cocaine use Cocaineinduced midline destructive lesions can indeed cause nasal septal perforation with similarities to this image. However, cocaine typically affects the cartilaginous septum first and to a greater degree than bony structures. This image shows more extensive bony destruction than would be typical for cocaineinduced damage alone.
C. Congenital absence of nasal septum Congenital absence would present earlier in life and would not show the inflammatory changes and irregular destruction pattern seen here. Congenital anomalies typically have smooth, welldefined margins rather than the irregular, destructive pattern visible in this scan.
E. Nasal septal abscess A septal abscess would appear as a fluid collection/mass between septal mucoperichondrial flaps with potential erosion but would not cause this degree of complete septal destruction. It would also likely show more localized findings rather than the extensive destruction visible in this image.
The pattern of destruction with complete loss of nasal septum, especially affecting both cartilaginous and bony components with surrounding inflammatory changes, is most consistent with granulomatosis with polyangiitis (GPA).

-------------------------------------------------------------------------------------------------------

**5.Patient ID: 20210218**

**URL**

[https://www.nejm.org/imagechallenge?ci=20210218&startFrom=201&startPage=11](https://www.nejm.org/image-challenge?ci=20210218&startFrom=201&startPage=11)

**Photoonly ChatGPT 4o**

Correct Answer: C. Urachal mucinous cystic tumor
 Rationale:
The CT image provided shows a large, wellcircumscribed, midline cystic mass located anterior to the bladder, extending superiorly into the lower abdomen. The lesion appears homogeneous, with low attenuation consistent with a fluidfilled or mucinous content.
This anatomic location and imaging appearance is characteristic of a urachal tumor, especially a mucinous cystic tumor which arises from remnants of the urachus — a vestigial embryologic structure that extends from the bladder dome to the umbilicus
 Option Analysis:
* A. Abdominal aortic aneurysm
 ❌ Incorrect — An AAA would be posterior and retroperitoneal, centered on the aorta. The lesion here is anterior and midline, not vascular in nature.
* B. Castleman disease
 ❌ Incorrect — This is typically a lymphoproliferative disorder presenting with solid lymph node masses, often in the mediastinum or retroperitoneum, not a cystic midline lesion.
* C. Urachal mucinous cystic tumor
 ✅ Correct — The imaging features (cystic midline supravesical mass) and location (between the bladder and umbilicus) are classic for this rare tumor. These can become malignant and require surgical resection.
* D. Cysticercosis
 ❌ Incorrect — While cysticercosis may present with cystic lesions, they are typically multiple, smaller, and located in muscle or brain rather than a single large midline abdominal mass.
* E. Wilm’s tumor
 ❌ Incorrect — This is a renal malignancy of childhood. It arises from the kidney, which this lesion does not involve, and typically appears more solid than cystic.
 Conclusion:
The CT demonstrates a midline, supravesical cystic lesion consistent with a urachal mucinous cystic tumor (C). Given the location and morphology, this is the most appropriate and specific diagnosis.
Would you like a brief summary on management or histopathologic features of urachal tumors?

**Photo+text ChatGPT 4o**

Correct Answer: C. Urachal mucinous cystic tumor
 Rationale:
The CT image shows a large, welldefined, midline cystic mass located anterior to the spine and posterior to the abdominal wall, extending from the epigastrium to the pelvis. The patient is an 80yearold man with abdominal distention, constipation, and weight loss, which are symptoms of a spaceoccupying lesion.
The features most consistent with this presentation include:
* Location: Midline and anterior, consistent with the urachal remnant tract.
* Morphology: The mass is large, homogeneous, and cystic, typical for mucinous cystic tumors.
* Age group: Although urachal tumors typically present earlier, mucinous cystic tumors may present late if slowgrowing.
* Clinical findings: Nontender, dull mass on percussion suggests a fluidfilled lesion rather than a vascular or solid lymphoid mass.
 Exclusion of Other Options:
* A. Abdominal aortic aneurysm
 ❌ Incorrect — This mass is too anterior and cystic in nature. An AAA is retroperitoneal, arises from the aorta, and usually shows mural thrombus and calcifications.
* B. Castleman disease
 ❌ Incorrect — Typically presents as a solid lymph node mass, most often in the mediastinum or retroperitoneum, not as a large cystic lesion.
* C. Urachal mucinous cystic tumor
 ✅ Correct — Midline, anterior, supravesical, cystic lesion in an elderly patient is most consistent with this rare tumor.
* D. Cysticercosis
 ❌ Incorrect — Characterized by multiple small cystic lesions, often in the CNS or muscle, not by a single massive abdominal mass.
* E. Wilm’s tumor
 ❌ Incorrect — Typically occurs in children and arises from the kidney, presenting as a solid renal mass. Not a match for this patient’s age or the mass location/appearance.
 Conclusion:
The CT imaging and clinical features point to C. Urachal mucinous cystic tumor, a rare tumor arising from the urachus. Despite its rarity, the combination of midline cystic mass, bladder to umbilicus trajectory, and older age presentation supports this diagnosis.
Would you like a management outline or discussion of malignant potential in urachal tumors?

**Photoonly Claude 3.7**

Based on the CT image provided, I'll analyze each option to determine the most likely diagnosis.
The correct answer is: C. Urachal mucinous cystic tumor
Rationale for selecting Urachal mucinous cystic tumor:
This sagittal CT image shows a large, wellcircumscribed cystic mass in the anterior lower abdomen, extending from what appears to be the anterior abdominal wall toward the bladder region. The location and characteristics are highly consistent with a urachal tumor. Urachal mucinous cystic tumors develop from remnants of the urachus, which is the embryonic connection between the bladder and umbilicus. These tumors typically present as midline cystic masses extending from the dome of the bladder toward the umbilicus, exactly as seen in this image. The homogeneous, fluiddensity appearance suggests its mucinous content.
Why the other options were excluded:
A. Abdominal aortic aneurysm:
An abdominal aortic aneurysm would appear as a dilated, often irregular vascular structure directly continuous with the aorta and would be located in the posterior abdomen, adjacent to the spine. The mass in this image is anterior, away from the aortic region, and does not demonstrate the expected contrast enhancement or continuity with the aorta that would be characteristic of an aneurysm.
B. Castleman disease:
Castleman disease typically presents as lymph node enlargement, often in the mediastinum, retroperitoneum, or neck. The lesions are usually solid rather than cystic and would not form a large anterior abdominal mass with this appearance and location. They also tend to show enhancement with contrast, which is not evident here.
D. Cysticercosis:
Cysticercosis involves multiple small cystic lesions due to Taenia solium infection, most commonly in the brain, muscle, or subcutaneous tissues. A single large cystic mass in the anterior abdominal wall/pelvic region would be an extremely atypical presentation for cysticercosis.
E. Wilms' tumor:
Wilms' tumor (nephroblastoma) arises from the kidney and would appear as a solid, heterogeneous mass that distorts the renal contour. This image shows a cystic mass in the anterior abdominal wall/pelvis, completely separate from the kidneys, which rules out Wilms' tumor.

**Photo+text Claude 3.7**

Based on the clinical information and the CT image provided, I'll analyze each potential diagnosis.
The correct answer is: A. Abdominal aortic aneurysm
Rationale for selecting Abdominal aortic aneurysm:
The sagittal CT image shows a very large, expansile, homogeneous mass in the anterior abdomen that extends from the epigastrium to the pelvis, corresponding with the physical examination findings. This mass appears to originate from the abdominal aorta, consistent with a giant abdominal aortic aneurysm (AAA). The clinical presentation of an elderly 80yearold man with abdominal bloating, constipation, and weight loss aligns with symptoms caused by a large AAA exerting mass effect on surrounding structures. The size and location of this aneurysm explain the clinical findings of a nontender, dull mass on percussion extending from the epigastrium to the pelvis. The homogeneous appearance suggests that it is likely a thrombosed aneurysm.
Why the other options were excluded:
B. Castleman disease:
Castleman disease typically presents as lymph node enlargement, often in the mediastinum or retroperitoneum. It doesn't typically form a single massive abdominal mass of this size and would be extremely unusual in an 80yearold patient as the initial presentation. The imaging appearance is not consistent with the lymph node pattern seen in Castleman disease.
C. Urachal mucinous cystic tumor:
While urachal tumors can present as cystic masses in the anterior abdomen, they typically arise from the dome of the bladder and extend toward the umbilicus. This mass is much larger and appears to originate from a deeper structure. Urachal tumors would not typically cause such extensive abdominal distension from epigastrium to pelvis or present with these specific symptoms in an elderly male.
D. Cysticercosis:
Cysticercosis typically presents with multiple small cystic lesions rather than a single massive abdominal mass. The clinical presentation and radiographic appearance are not consistent with cysticercosis, which would be unlikely to cause a single large abdominal mass with these characteristics.
E. Wilms' tumor:
Wilms' tumor (nephroblastoma) is almost exclusively a pediatric condition, typically occurring in children under 5 years of age. It would be extraordinarily rare in an 80yearold man. Additionally, Wilms' tumor arises from the kidney and would not present as a midline mass extending from epigastrium to pelvis with these imaging characteristics.

-------------------------------------------------------------------------------------------------------

**6.Patient ID: 20210304**

**URL**

[https://www.nejm.org/imagechallenge?ci=20210304&startFrom=201&startPage=11](https://www.nejm.org/image-challenge?ci=20210304&startFrom=201&startPage=11)

**Photoonly ChatGPT 4**

Correct answer: A. Pulmonary alveolar microlithiasis
 Rationale:
The chest radiograph shows a characteristic "sandstorm appearance"—a diffuse, bilateral, micronodular pattern of highdensity opacities most pronounced in the middle and lower lung zones, which is classic for pulmonary alveolar microlithiasis (PAM).
PAM is a rare, autosomal recessive disorder characterized by the deposition of calcium phosphate microliths within the alveoli. It is caused by mutations in the SLC34A2 gene, which encodes a sodiumphosphate cotransporter expressed in type II alveolar cells.
Despite extensive radiographic changes, patients may be relatively asymptomatic or present with only mild symptoms for many years—a classic clinical–radiographic dissociation.
 Why other options are excluded:
* B. Bronchiolitis obliterans organizing pneumonia (BOOP): Typically shows patchy, migratory, peripheral consolidations rather than diffuse micronodular calcifications. The radiograph here lacks the classic features of BOOP.
* C. Pulmonary edema: Would show bilateral perihilar opacities ("batwing" pattern), often with cardiomegaly and pleural effusions, not the dense, sandlike calcific micronodules seen here.
* D. Idiopathic pulmonary fibrosis (IPF): Usually presents with reticular opacities, traction bronchiectasis, and honeycombing predominantly in the lower lobes and subpleural regions. No calcifications or sandlike appearance.
* E. Diffuse alveolar hemorrhage: Typically presents with diffuse bilateral alveolar infiltrates that are fluffy and homogeneous, not nodular or calcified. Also often presents acutely with hemoptysis and anemia, which PAM lacks.
 Summary:
The radiographic hallmark of calcified micronodules diffusely throughout the lung fields strongly supports the diagnosis of pulmonary alveolar microlithiasis, making option A the correct and bestsupported answer
Would you like a comparative annotated image or visual explanation to highlight these findings?

**Photo+text ChatGPT 4o**

Correct answer: E. Diffuse alveolar hemorrhage
 Rationale:
The chest radiograph reveals diffuse bilateral airspace opacities, giving a "batwing" or fluffy alveolar pattern without clear lobar consolidation or volume loss. These findings are highly consistent with diffuse alveolar hemorrhage (DAH).
The clinical history of a young woman with a 2month history of cough and worsening dyspnea supports this diagnosis, particularly in the absence of overt infection or heart failure symptoms. DAH often presents subacutely or acutely with:
* Hemoptysis (sometimes absent),
* Anemia,
* Hypoxemia,
* Bilateral infiltrates on imaging.
Common causes include:
* Smallvessel vasculitis (e.g., ANCAassociated),
* Systemic lupus erythematosus,
* Goodpasture’s syndrome,
* Certain drugs or coagulation disorders.
 Why other options are excluded:
* A. Pulmonary alveolar microlithiasis: Shows diffuse, sandlike, calcified micronodules with a characteristic “sandstorm” appearance. No such dense nodularity or calcification is seen here.
* B. Bronchiolitis obliterans organizing pneumonia (BOOP/cryptogenic organizing pneumonia): Usually causes patchy peripheral consolidations, often migratory, with more focal patterns than the diffuse alveolar process seen here.
* C. Pulmonary edema: Typically has a central perihilar ("batwing") pattern, cardiomegaly, and possible pleural effusions. In this young woman, with no history of cardiac disease and a more homogeneous alveolar pattern, cardiogenic edema is less likely.
* D. Idiopathic pulmonary fibrosis (IPF): Presents with reticular opacities, basilar predominance, traction bronchiectasis, and honeycombing—none of which are observed here.
 Summary:
The bilateral, homogeneous alveolar infiltrates and subacute presentation in a young adult woman most strongly suggest diffuse alveolar hemorrhage, making option E the correct diagnosis.
Would you like a brief differential of DAH causes in young adults or autoimmuneassociated workup recommendations?

**Photoonly Claude 3.7**

Based on the chest Xray provided, I can identify the correct diagnosis.
The correct answer is A. Pulmonary alveolar microlithiasis (PAM).
 Rationale for Pulmonary Alveolar Microlithiasis
This chest radiograph shows characteristic findings of pulmonary alveolar microlithiasis:
 Diffuse, bilateral, symmetrical small calcific opacities ("sandstorm" appearance)
 Increased density in the lower lung zones (gravitational distribution)
 Preserved lung volumes despite extensive involvement
 Clear definition of the heart border (in contrast to pulmonary edema)
 Fine, sandlike micronodular pattern throughout both lung fields
PAM is a rare autosomal recessive disorder characterized by intraalveolar accumulation of microliths (calcium phosphate concretions) caused by mutations in the SLC34A2 gene, which encodes a sodiumphosphate cotransporter. The classic radiographic appearance of this "sandstorm lung" is pathognomonic, with diffuse micronodular calcifications that are most concentrated in the lower lung zones.
 Why the other options were excluded:
B. Bronchiolitis obliterans organizing pneumonia (BOOP/COP)
 BOOP typically presents with peripheral, patchy consolidations
 Lacks the diffuse micronodular calcific pattern seen here
 Usually asymmetric and often spares the lower lobes
 Does not cause the distinctive "sandstorm" appearance
C. Pulmonary edema
 Pulmonary edema shows more fluffy, butterfly/batwing opacities
 Typically has peribronchial cuffing and septal lines (Kerley B lines)
 Often includes pleural effusions and cardiomegaly
 Lacks the fine, sandlike calcific pattern seen in this image
D. Idiopathic pulmonary fibrosis (IPF)
 IPF shows reticular opacities and honeycombing
 Has a peripheral and basilar predominance
 Features traction bronchiectasis and architectural distortion
 Lacks the diffuse calcifications characteristic of PAM

E. Diffuse alveolar hemorrhage
 Presents with diffuse, fluffy airspace opacities
 Shows a more homogeneous pattern than the granular appearance seen here
 Lacks the distinctive calcifications
 Often appears in acute phases and can clear or evolve over days
The "sandstorm" appearance with diffuse, symmetrical micronodulations and lower zone predominance is classic for pulmonary alveolar microlithiasis, making option A the correct diagnosis.

**Photo+text Claude 3.7**

Based on the chest Xray and clinical information provided, I'll analyze this case.
The correct answer is A. Pulmonary alveolar microlithiasis (PAM).
 Rationale for selecting PAM:
The chest Xray shows classic radiographic features of pulmonary alveolar microlithiasis:
 Diffuse, bilateral, symmetrical small calcific opacities creating a "sandstorm" appearance
 Fine, sandlike micronodular pattern distributed throughout both lung fields
 More pronounced density in the lower lung zones (gravitational distribution)
 Preserved lung volumes despite extensive involvement
 Welldefined heart borders visible through the opacities
The patient's young age (36 years) and relatively mild symptoms despite extensive radiographic changes are also consistent with PAM, which often has a striking discrepancy between radiographic severity and clinical presentation. PAM is a rare genetic disorder caused by mutations in the SLC34A2 gene, leading to intraalveolar deposition of calcium phosphate microliths.
 Why the other options were excluded:
B. Bronchiolitis obliterans organizing pneumonia (BOOP/COP)
 BOOP typically shows patchy, peripheral consolidations or groundglass opacities
 Lacks the diffuse, fine, sandlike calcific opacities seen here
 Usually presents with more acute/subacute symptoms relative to radiographic findings
C. Pulmonary edema
 Pulmonary edema typically shows central/perihilar opacities (butterfly/batwing pattern)
 Often includes Kerley B lines, peribronchial cuffing, and pleural effusions
 Frequently associated with cardiomegaly
 The opacities are more homogeneous rather than the fine granular pattern seen here
D. Idiopathic pulmonary fibrosis (IPF)
 IPF shows reticular opacities, honeycombing, and traction bronchiectasis
 Has a peripheral and basal predominance
 Typically affects older patients (usually >50 years)
 Lacks the diffuse, fine, sandlike opacities seen in this image
E. Diffuse alveolar hemorrhage
 Presents with diffuse, homogeneous airspace opacities
 Lacks the micronodular calcific pattern shown here
 Usually has a more acute clinical presentation
 Often associated with hemoptysis, which wasn't mentioned in this case
The characteristic "sandstorm" appearance with the fine, diffuse micronodular pattern, along with the clinical presentation in a young woman with relatively mild symptoms despite extensive radiographic findings, strongly supports the diagnosis of pulmonary alveolar microlithiasis.

**7.Patient ID: 20210401**

**URL**

[https://www.nejm.org/imagechallenge?ci=20210401&startFrom=201&startPage=11](https://www.nejm.org/image-challenge?ci=20210401&startFrom=201&startPage=11)

**Photoonly ChatGPT 4o**

Correct answer: C. Tularemia
 Rationale:
The image shows an ulceroglandular lesion at the umbilicus, which is erythematous and raised, consistent with an escharlike appearance. The clinical image strongly suggests ulceroglandular tularemia, the most common form of tularemia caused by *Francisella tularensis*.
Key features supporting tularemia:
* Central necrotic ulcer or eschar with surrounding erythema.
* Occurs at the site of arthropod bites (e.g., ticks, deer flies) or contact with infected animals (e.g., rabbits).
* Common in children and outdoor settings.
* Associated with regional lymphadenopathy (not shown here but typical).
 Why other options are excluded:
* A. Ehrlichiosis – Typically presents with fever, malaise, leukopenia, thrombocytopenia, and occasionally a maculopapular or petechial rash, but not eschar or ulcerative skin lesions.
* B. Babesiosis – Primarily a malarialike illness caused by protozoa (Babesia), characterized by hemolytic anemia, fever, and fatigue; no skin lesions are characteristic.
* D. Lyme disease – Presents with erythema migrans, a spreading bull'seye rash, not a necrotic ulcer. Lesion is typically flat and nonsuppurative.
* E. Rocky Mountain spotted fever (RMSF) – Presents with petechial rash starting on wrists/ankles and spreading centrally. May involve eschar in *Rickettsia parkeri*, but RMSF classically does not have a prominent eschar.
 Conclusion:
The presence of a localized ulcerative lesion at the site of inoculation, particularly resembling an eschar and occurring in a child, is classic for ulceroglandular tularemia.
Correct diagnosis: C. Tularemia
Would you like a brief review on *Francisella tularensis* transmission and management?

**Photo+text ChatGPT 4o**

Correct answer: C. Tularemia
 Clinical Summary:
* Patient: 5yearold girl
* Presentation: Painful swelling on both sides of the lower abdomen for 4 weeks
* History: Tick bite at the umbilicus 6 weeks prior; fever developed 5 days later
* Image findings: Escharlike ulcer at the umbilicus with surrounding erythema and induration
 Diagnosis: Ulceroglandular Tularemia
This is the most common form of *Francisella tularensis* infection and fits the presentation perfectly:
* Vector: Tick bite (common mode of transmission)
* Local lesion: Papule → ulcer → eschar at inoculation site (umbilicus)
* Regional lymphadenopathy: Painful bilateral lower abdominal swelling likely represents inguinal lymphadenitis
* Systemic symptoms: Fever is common within days of inoculation
 Why other options are excluded:
* A. Ehrlichiosis
 Typically presents with fever, malaise, cytopenias, and sometimes rash; does not cause eschar or prominent ulcerative lesions.
* B. Babesiosis
 Tickborne parasitic disease causing hemolytic anemia and systemic symptoms, but no skin ulcers or lymphadenopathy typical of this case.
* D. Lyme disease
 Characterized by erythema migrans (expanding, nonpainful, nonulcerative rash), arthritis, and neurologic or cardiac complications—not an eschar or regional adenopathy.
* E. Rocky Mountain spotted fever
 Caused by *Rickettsia rickettsii*, typically presents with maculopapular → petechial rash starting on wrists/ankles; eschars are rare and not a classic finding.
 Conclusion:
The combination of a tick bite, ulcer/eschar at the site, inguinal lymphadenopathy, and fever strongly supports the diagnosis of ulceroglandular tularemia.
> ✅ Correct answer: C. Tularemia
Would you like a management overview for pediatric tularemia cases?

**Photoonly Claude 3.7**

Based on the clinical image provided, I can see an umbilicated lesion with surrounding erythema that appears to be an eschar (necrotic center with a black crust) on what looks like the abdominal region of a patient. This is often referred to as a "tache noire" or black spot.
The correct answer is: C. Tularemia
Rationale for selecting Tularemia:
 The image shows a characteristic ulcerated lesion with a necrotic center (eschar), which is a hallmark of tularemia, particularly the ulceroglandular form.
 This type of lesion typically develops at the site where the bacterium Francisella tularensis enters the skin, often from a tick or deer fly bite, or from handling infected animal tissues.
 The lesion begins as a papule that becomes pustular, ulcerates, and develops the characteristic necrotic center with surrounding inflammation.
Why the other options were excluded:
A. Ehrlichiosis:
 Ehrlichiosis typically presents with a nonspecific maculopapular or petechial rash rather than an eschar.
 The rash in ehrlichiosis is usually diffuse and does not form ulcerated lesions with necrotic centers.
B. Babesiosis:
 Babesiosis rarely causes skin manifestations.
 When skin findings are present, they tend to be nonspecific and do not include eschar formation.
 Babesiosis primarily presents with systemic symptoms like fever, fatigue, and hemolytic anemia.
D. Lyme disease:
 The classic skin finding in Lyme disease is erythema migrans, which appears as an expanding annular (ringlike) erythematous lesion with central clearing (bull'seye appearance).
 Lyme disease does not cause eschar formation or ulceration at the site of the tick bite.
E. Rocky Mountain spotted fever:
 While RMSF is tickborne and can sometimes present with an eschar, its hallmark finding is a maculopapular rash that typically begins on the wrists and ankles and spreads centrally.
 The rash often becomes petechial rather than forming a characteristic ulcer with a necrotic center.
 Eschars are much less common in RMSF compared to tularemia.
The presence of the distinctive eschar (tache noire) strongly supports the diagnosis of tularemia over the other tickborne illnesses listed.

**Photo+text Claude 3.7**

Based on the clinical image and patient history provided, I can now provide a more comprehensive analysis of this case.
The correct answer is: E. Rocky Mountain spotted fever

Rationale for selecting Rocky Mountain spotted fever (RMSF):
 The image shows an umbilicated lesion with surrounding erythema at the site of a tick bite (umbilicus)
 The clinical history includes a tick that was buried in the umbilicus for an unknown duration
 The patient developed fever 5 days after tick removal, which is consistent with the incubation period for RMSF (312 days)
 The painful swelling on both sides of the lower abdomen suggests lymphadenopathy, which can occur with RMSF
 The prolonged course (4week history of symptoms) is compatible with untreated or partially treated RMSF
 The escharlike lesion, while more commonly associated with tularemia, can occasionally be seen in RMSF, especially at the site of tick attachment
Why the other options were excluded:
A. Ehrlichiosis:
 Ehrlichiosis typically presents with a nonspecific maculopapular rash rather than a focal lesion
 Eschar formation is not characteristic of ehrlichiosis
 Bilateral painful abdominal swelling would be unusual for ehrlichiosis
B. Babesiosis:
 Babesiosis rarely causes skin manifestations or eschar formation
 It does not typically cause lymphadenopathy or painful swelling
 Babesiosis primarily presents with systemic symptoms like fever, fatigue, and hemolytic anemia
C. Tularemia:
 While tularemia frequently presents with an eschar at the site of inoculation, the bilateral painful swelling suggests a more systemic process
 The timing of fever onset (5 days posttick removal) is more consistent with RMSF than tularemia
 Tularemia typically presents with a single painful regional lymph node rather than bilateral swelling
D. Lyme disease:
 The classic skin finding in Lyme disease is erythema migrans, not an escharlike lesion
 Erythema migrans typically appears 330 days after tick attachment
 Painful bilateral lymphadenopathy would be unusual for early Lyme disease
 The lesion in the image lacks the characteristic expanding ringlike appearance of erythema migrans
The combination of tick bite, fever onset 5 days after tick removal, escharlike lesion at the site of tick attachment, and bilateral painful swelling strongly supports the diagnosis of Rocky Mountain spotted fever in this case.

-------------------------------------------------------------------------------------------------------

**8.Patient ID: 20220324**

**URL**

[https://www.nejm.org/imagechallenge?ci=20220324&startFrom=141&startPage=8](https://www.nejm.org/image-challenge?ci=20220324&startFrom=141&startPage=8)

**Photoonly ChatGPT 4o**

Looking at the image you provided, it appears to show a pattern of skin discoloration, specifically a bluish or purplish, netlike pattern that is most consistent with a vascular issue. Given this presentation, let's consider the options:
D. Livedo reticularis is the most likely diagnosis.
Rationale for choosing D (Livedo Reticularis):
 Livedo reticularis is characterized by a lacelike, mottled appearance of the skin caused by blood flow irregularities. The pattern you see in the image is a typical finding in this condition, where the superficial veins and capillaries constrict and dilate, leading to a network of vascular changes. This can be idiopathic or associated with underlying conditions such as autoimmune diseases, vasculitis, or coagulation disorders.
 Why the other options were excluded:
 A. Cutis Marmorata: This is a similar pattern, but it typically occurs in response to cold or environmental factors and is most common in infants. The pattern is often less persistent and more diffuse compared to the distinct network seen in livedo reticularis.
 B. Harlequin Syndrome: This condition presents with unilateral sweating and flushing of the face, often after a neurological event like a stroke. It does not present with the mottled, bluish discoloration seen in the image.
 C. Livedo Racemosa: While it shares some characteristics with livedo reticularis, livedo racemosa presents as a more prominent and irregular vascular pattern and is typically associated with systemic conditions like antiphospholipid syndrome or vasculitis. The pattern in the image does not fully match this more severe form of livedo.
 E. Telangiectasia: This condition involves the dilation of small blood vessels, leading to visible red or purple lines. It lacks the netlike, mottled appearance typical of livedo reticularis, which is why it doesn't fit the presentation here.
Thus, livedo reticularis is the most appropriate diagnosis in this case.

**Photo+text ChatGPT 4o**

Given the clinical context of the patient—a 63yearold man who developed purplish discoloration of his face following stenting and balloon dilation of the left common carotid artery, with a diagnosis of cholesterol embolization syndrome—let’s now evaluate the physical exam finding in the image.
 The correct diagnosis is C. Livedo racemosa.
Rationale:
 Livedo racemosa is characterized by a more irregular, prominent, and often branching vascular pattern, which can be seen in the image. This condition is typically associated with embolic phenomena, such as cholesterol embolization syndrome, which can occur after invasive vascular procedures like stenting and balloon dilation.
 Cholesterol embolization occurs when cholesterol crystals break off from atherosclerotic plaques and lodge in small vessels, leading to skin changes like livedo racemosa. This netlike, violaceous pattern is often seen in affected areas, such as the face and extremities, as seen here in the image.
 Why the other options were excluded:
 A. Cutis marmorata: This condition typically appears in response to cold temperatures and is a transient response seen mostly in infants or as a sign of circulatory compromise. It presents as a reddish or bluish discoloration with a netlike pattern, but it’s not associated with vascular procedures or cholesterol embolization.
 B. Harlequin syndrome: This syndrome involves unilateral flushing and sweating due to a neurological disorder affecting sympathetic nerve function. It would not present with the characteristic purplish, mottled vascular pattern seen here.
 D. Livedo reticularis: This condition is similar to livedo racemosa but presents with a less irregular pattern. Livedo reticularis is often seen in conditions like vasculitis or autoimmune diseases, but it is not as strongly associated with cholesterol embolization as livedo racemosa
 E. Telangiectasia: Telangiectasia refers to dilated small blood vessels that form red or purple lines or spots. It lacks the mottled or netlike pattern of livedo racemosa and is typically seen in conditions like rosacea, not in embolic phenomena.
Thus, livedo racemosa is the most appropriate diagnosis given the clinical and visual findings.

**Photoonly Claude 3.7**

"I can see a clinical image showing facial findings in an individual. Based on the provided options, I'll analyze the visible dermatological pattern and select the most appropriate diagnosis.
The correct answer is: C. Livedo racemosa
Rationale for choosing Livedo racemosa:
 The image shows an asymmetric, irregular, broken reticular pattern of discoloration on the face
 The violaceous/purplish netlike pattern appears to be fixed rather than transient
 The pattern is more irregular and less uniform than would be expected in livedo reticularis
 The discoloration has a branching appearance typical of livedo racemosa, particularly visible on the right side of the face
 Livedo racemosa is associated with underlying vascular pathology and can be a sign of more serious conditions including vasculitis, thrombotic disorders, or antiphospholipid syndrome
Why the other options were excluded:
A. Cutis marmorata:
 Cutis marmorata presents as a symmetric, mottled, marbled appearance of the skin
 It is typically transient and responsive to temperature changes
 Usually seen in infants or as a physiologic response to cold
 The pattern in the image is more fixed, asymmetric, and irregular than cutis marmorata
B. Harlequin syndrome:
 Harlequin syndrome presents as a sharp demarcation of flushing and sweating, typically affecting one side of the face
 It involves autonomic dysfunction causing unilateral loss of facial sweating and flushing
 The image shows a reticular pattern rather than the hemifacial color change characteristic of Harlequin syndrome
D. Livedo reticularis:
 While similar to livedo racemosa, livedo reticularis presents with a more symmetric, regular, complete ""fishnet"" pattern
 Livedo reticularis is often reversible with warming and may be physiologic
 The pattern in this image is more irregular, broken, and asymmetric, consistent with livedo racemosa rather than the more uniform appearance of livedo reticularis
E. Telangiectasia:
 Telangiectasia presents as dilated superficial blood vessels forming fine red lines or small focal red spots
 It does not form the netlike or reticular pattern seen in this image
 The lesions in telangiectasia are typically much smaller, finer, and more discrete than the diffuse pattern seen here"

**Photo+text Claude 3.7**

"The correct answer is: C. Livedo racemosa
Rationale for choosing Livedo racemosa:
 The image shows an asymmetric, irregular, broken netlike (reticular) pattern of purplish discoloration on the face
 This pattern is characteristic of livedo racemosa, which presents as an irregular, broken, and asymmetric network of bluishpurple discoloration
 The clinical context of cholesterol embolization syndrome following carotid artery stenting and balloon dilation strongly supports this diagnosis
 Livedo racemosa specifically occurs due to irregular blood flow in the dermal and subcutaneous vessels, often from embolic or inflammatory vascular occlusion
 The cholesterol emboli from the manipulated atherosclerotic plaque during the carotid intervention would explain this finding perfectly
Why the other options were excluded:
A. Cutis marmorata:
 Cutis marmorata is a physiologic, transient marbled appearance that typically appears in response to cold exposure
 It presents as a symmetric, regular pattern and typically resolves with warming
 It's not associated with cholesterol embolization syndrome or vascular interventions
B. Harlequin syndrome:
 Harlequin syndrome presents with a clearcut demarcation of flushing/sweating on one side of the face
 It's caused by autonomic dysfunction, not embolic phenomena
 The pattern in the image is reticular rather than a simple unilateral color change
D. Livedo reticularis:
 While similar to livedo racemosa, livedo reticularis presents with a more regular, complete, and symmetric ""fishnet"" pattern
 It can be benign/physiologic (especially with cold exposure) or associated with certain diseases
 Livedo racemosa is the more appropriate term for the irregular, broken pattern seen in vascular occlusive disease like cholesterol embolization syndrome
E. Telangiectasia:
 Telangiectasia appears as fine, dilated superficial blood vessels or spiderlike vessels
 These are discrete, small, linear or spiderlike red lesions
 The image clearly shows a diffuse reticular pattern rather than discrete dilated vessels"

------------------------------------------------------------------------------------------------------

**9.Patient ID: 20220908**

**URL**

[https://www.nejm.org/imagechallenge?ci=20220908&startFrom=121&startPage=7](https://www.nejm.org/image-challenge?ci=20220908&startFrom=121&startPage=7)

**Photoonly ChatGPT 4o**

Correct Answer: A. Giant Coronary Aneurysm
 Rationale:
The chest radiograph shows a sharply marginated, round mediastinal mass adjacent to the heart silhouette. The location and contour suggest a vascular structure, specifically originating from the coronary artery. This finding is consistent with a giant coronary artery aneurysm, often seen as an abnormal, rounded opacity along the cardiac borders.
Giant coronary aneurysms are most commonly associated with Kawasaki disease in children but can persist into adulthood or develop due to atherosclerosis, connective tissue disorders, or vasculitis. These aneurysms may be asymptomatic or present with chest pain, and are often incidentally discovered on imaging.
 Why the other choices are incorrect:
* B. Left Atrial Appendage Thrombus:
 Typically not visible on plain chest radiograph. Diagnosis is usually made with echocardiography (especially TEE). It would not produce the sharply defined, rounded mass seen here.
* C. Mediastinal Hematoma:
 Usually results from trauma or rupture (e.g., aortic), presenting as a widened mediastinum with less welldefined borders. The mass in this image is wellcircumscribed, arguing against hematoma.
* D. Pericardial Cyst:
 These are usually located at the right cardiophrenic angle and present as a homogenous, nonenhancing waterdensity mass. The location and appearance here are not typical of a pericardial cyst.
* E. Teratoma:
 A mediastinal teratoma can appear as a mass with fat, soft tissue, and calcifications on imaging (especially CT). On Xray, it tends to be an anterior mediastinal mass, but this image lacks features suggestive of teratoma such as heterogeneous density or calcification.
Would you like a labeled version of the image showing the mass location?

**Photo+text ChatGPT 4o**

Correct Answer: D. Pericardial Cyst
 Rationale:
The chest radiograph shows a wellcircumscribed, noncalcified mass along the left heart border, specifically at the left cardiophrenic angle. The lesion has a homogeneous appearance and has gradually increased in size over several years without symptoms, which is characteristic of a pericardial cyst.
Pericardial cysts are benign congenital anomalies of the pericardium, often found incidentally on imaging. They most commonly appear at the right cardiophrenic angle but can also occur on the left. They are typically:
* Round or oval
* Noncalcified
* Wellcircumscribed
* Nonenhancing (on CT)
* Asymptomatic unless very large or infected
The slow progression over years without symptoms in an elderly patient is classic for this entity.
 Why the other choices are incorrect:
* A. Giant Coronary Aneurysm
 Would more likely appear near the coronary arterial course and not typically persist or enlarge slowly over years without symptoms, especially in a patient with no history of vasculitis or Kawasaki disease.
* B. Left Atrial Appendage Thrombus
 This would not be visible on chest Xray; diagnosis requires echocardiography (usually transesophageal). It also would not persist or slowly enlarge over six years.
* C. Mediastinal Hematoma
 Typically arises acutely from trauma or aortic rupture and presents with symptoms. It would not gradually enlarge over years or remain asymptomatic.
* E. Teratoma
 Usually an anterior mediastinal mass, often heterogeneous on imaging (may contain fat, fluid, calcifications). Teratomas tend to present earlier in life and would likely cause symptoms or distinct radiographic features over time.
 Summary:
A pericardial cyst is the most likely diagnosis based on the location (left cardiophrenic angle), appearance (wellcircumscribed), clinical course (slow growth, asymptomatic), and patient history.

**Photoonly Claude 3.7**

"Based on the chest Xray image provided, I'll analyze the radiographic findings and determine the most likely diagnosis among the options.
The correct answer is: D. Pericardial Cyst
Rationale for selecting Pericardial Cyst:
The chest Xray shows a welldefined, homogeneous, round opacity with smooth borders in the left cardiophrenic angle. Pericardial cysts typically present as waterdensity, thinwalled lesions that most commonly occur in the right cardiophrenic angle (70% of cases), but can also appear in the left cardiophrenic angle (as seen here). This finding demonstrates the characteristic radiographic appearance of a pericardial cyst a wellcircumscribed, round or oval lesion that appears to be contiguous with the cardiac silhouette. Pericardial cysts are usually benign, congenital anomalies filled with clear fluid and lined by mesothelial cells.
Why the other options are excluded:
A. Giant Coronary Aneurysm:
 Coronary aneurysms typically would not be visible as discrete structures on plain chest radiography
 They would be situated within the heart itself rather than at the cardiophrenic angle
 Even giant coronary aneurysms would not typically present with this appearance and location
B. Left Atrial Appendage Thrombus:
 Left atrial appendage thrombi are intracardiac and would not be visible as discrete entities on plain chest Xray
 They are typically diagnosed with echocardiography, CT, or MRI
 The location and welldefined nature of this lesion is inconsistent with left atrial thrombus
C. Mediastinal Hematoma:
 Mediastinal hematomas typically appear as illdefined widening of the mediastinum
 They often have irregular borders and variable density
 Mediastinal hematomas are usually associated with trauma, aortic dissection, or rupture, and would not present with this wellcircumscribed appearance at the cardiophrenic angle
E. Teratoma:
 Mediastinal teratomas typically occur in the anterior mediastinum, not the cardiophrenic angle
 They often contain calcifications, fat, or other heterogeneous elements that would give a more complex appearance
 Teratomas are usually larger and more heterogeneous in appearance than the homogeneous lesion seen here
In conclusion, the radiographic appearance of a welldefined, homogeneous, round opacity at the left cardiophrenic angle is most consistent with a pericardial cyst (option D)."

**Photo+text Claude 3.7**

"After reviewing the chest Xray and clinical information provided, I'll determine the most appropriate diagnosis from the options given.
The correct answer is: D. Pericardial Cyst
Rationale for selecting Pericardial Cyst:
The chest Xray shows a welldefined, homogeneous, rounded opacity with smooth borders adjacent to the left heart border, specifically at the left cardiophrenic angle. The key clinical features supporting this diagnosis include:
1. Incidental finding on chest Xray with no associated symptoms
2. Slow growth pattern over years (gradual increase in size over 6 years)
3. Wellcircumscribed, homogeneous appearance with water density
4. Location at the cardiophrenic angle
Pericardial cysts are benign congenital anomalies containing serous fluid. While they most commonly occur in the right cardiophrenic angle (7075%), they can also present in the left cardiophrenic angle as seen in this case. The patient's asymptomatic presentation is typical, as pericardial cysts are usually found incidentally on imaging.
Why the other options are excluded:
A. Giant Coronary Aneurysm:
 Coronary aneurysms would not typically appear as discrete, welldefined structures on plain chest radiography
 They would be located within the cardiac silhouette rather than adjacent to it
 They are often symptomatic and associated with chest pain, particularly in giant variants
 The slow growth pattern over 6 years would be unusual for an aneurysm
B. Left Atrial Appendage Thrombus:
 Not typically visible as a distinct structure on chest Xray
 Would require echocardiography, CT, or MRI for visualization
 In a patient with history of stroke, while thrombosis is a consideration, the radiographic appearance and location are not consistent with left atrial appendage thrombus
 Would not persist and grow slowly over 6 years
C. Mediastinal Hematoma:
 Typically presents acutely, not as a slowly growing mass over 6 years
 Usually associated with trauma, aortic dissection, or anticoagulation
 Would have irregular borders and variable density
 Would either resolve or require intervention rather than showing gradual growth
E. Teratoma:
 Mediastinal teratomas typically occur in the anterior mediastinum (not cardiophrenic angle)
 More common in younger patients
 Usually contain mixed tissue elements (fat, soft tissue, calcifications) giving a heterogeneous appearance
 Often symptomatic due to compression of adjacent structures
The asymptomatic presentation, location at the cardiophrenic angle, homogeneous appearance, and slow growth over years are all most consistent with a pericardial cyst."

-------------------------------------------------------------------------------------------------------

**10.Patient ID: 20220915**

**URL**

[https://www.nejm.org/imagechallenge?ci=20220915&startFrom=121&startPage=7](https://www.nejm.org/image-challenge?ci=20220915&startFrom=121&startPage=7)

**Photoonly ChatGPT 4o**

Correct answer: E. Left anterior descending artery
 ECG Analysis:
The image shows two 12lead ECGs, likely sequential for the same patient. Here's a detailed interpretation:
 Left Panel (Baseline ECG):
* Sinus rhythm
* Deep Q waves and T wave inversions in leads V1–V4
* Poor R wave progression
* Suggests anterior wall infarction, likely old
 Right Panel (New ECG):
* Monomorphic widecomplex tachycardia (likely ventricular tachycardia)
* Concordance in precordial leads
* Still prominent Q waves in V1–V4
* The tachycardia is likely arising from a scarred myocardium in the anterior wall, again pointing to prior infarction in the left anterior descending (LAD) artery territory
 Rationale for Correct Answer (E. Left anterior descending artery):
* The LAD supplies the anterior wall of the left ventricle and anterior 2/3 of the interventricular septum.
* Infarcts in this territory produce changes in V1–V4.
* The baseline ECG shows Q waves and Twave inversion in these leads, consistent with a prior LAD infarct.
* The second ECG shows VT, a known complication of prior myocardial infarction, especially from LAD occlusion due to a large area of infarcted myocardium.
 Why Other Options Are Incorrect:
* A. Right coronary artery – Typically involves inferior leads (II, III, aVF), which are not primarily affected here.
* B. Left circumflex artery – Affects lateral wall (leads I, aVL, V5–V6); not the predominant finding here.
* C. Left coronary artery – This is the main trunk before bifurcation into LAD and LCx. Occlusion here would typically cause massive infarction or sudden death, not a localized anterior infarct.
* D. Posterior descending artery – Supplies the posterior wall, typically produces tall R waves in V1–V2, which are not seen.
Would you like a schematic of coronary artery territories over ECG leads for quick reference?

**Photo+text ChatGPT 4o**

Correct answer: A. Right coronary artery
 Clinical Context:
A 58yearold man with known coronary artery disease presents with intermittent chest pain at rest, a classic presentation for unstable angina or non–STelevation myocardial infarction (NSTEMI) due to transient occlusion or reperfusion of a culprit coronary artery.
 ECG Interpretation:
 Left Panel (PainFree State):
* Sinus rhythm
* STsegment depressions in leads V1–V3
* Prominent R waves in V1–V2
* Horizontal ST depressions, particularly in V2–V3
This pattern is suggestive of posterior wall ischemia, which typically manifests as ST depression in anterior leads (V1–V3) due to the mirror image of ST elevation in posterior leads.
 Right Panel (During Pain):
* Sinus rhythm with a wide complex tachycardia (monomorphic VT)
* Diffuse STsegment abnormalities no longer clearly evaluable
* Reflects an evolution of ischemia leading to a ventricular arrhythmia, likely ventricular tachycardia (VT)
 Anatomic Correlation:
* The posterior wall is usually supplied by the posterior descending artery (PDA), which most commonly arises from the right coronary artery (RCA) in rightdominant circulation (which occurs in \~85% of people).
* The ST depressions in V1–V3 are classic reciprocal changes from posterior ST elevation (i.e., a posterior MI).
* RCA involvement, especially if proximal, can also cause ischemia to the inferior wall (not evident here but not required if PDA alone is affected).
 Rationale for Correct Answer:
* A. Right coronary artery – Correct. Supplies the PDA in most patients. Posterior MI manifests with ST depressions in anterior leads (V1–V3) and can cause VT due to ischemia.
 Why Other Options Are Incorrect:
* B. Left circumflex artery – May supply the posterior wall in leftdominant circulation (\~15%) but is less likely than RCA in general population. No lateral lead involvement seen (e.g., I, aVL, V5–V6).
* C. Left coronary artery – This refers to the left main artery, which would involve both LAD and LCx territories — a much larger infarct territory (usually shows widespread ST changes or shock), which is not seen here.
* D. Posterior descending artery – The PDA is the direct supplier of the posterior wall but is a branch of either the RCA or LCx. The question asks for the culprit lesion site — so the supplying main artery (RCA) is the correct answer.
* E. Left anterior descending artery – Typically causes ST elevation in V1–V4, not ST depression. No anterior STEMI pattern is seen here.
Would you like a visual schematic of ST changes by infarct territory?

**Photoonly Claude 3.7**

"Based on careful analysis of the electrocardiogram (ECG) presented, I can determine which coronary artery is most likely involved in this patient's condition.
The correct answer is: E. Left anterior descending artery
 Rationale for selecting Left Anterior Descending (LAD) artery:
The ECG shows classic findings of an anterior STelevation myocardial infarction (STEMI), which is typically associated with LAD occlusion:
1. STsegment elevation in the precordial leads (V1V6), most prominent in V2V4
2. Reciprocal ST depression in the inferior leads (II, III, aVF)
3. The ST elevations have a characteristic concaveupward appearance typical of LAD occlusion
4. Possible early Qwave formation in the anterior leads, suggesting myocardial necrosis in the territory supplied by the LAD
The pattern is indicative of a proximal or midLAD occlusion, as it affects a large portion of the anterior wall of the left ventricle.
 Why the other options are incorrect:
A. Right coronary artery (RCA): RCA occlusion typically causes inferior MI with ST elevations in leads II, III, and aVF, not the anterior leads. This ECG lacks the dominant inferior lead changes expected with RCA occlusion.
B. Left circumflex artery: Circumflex occlusion usually causes lateral or posterolateral MI with ST elevations in leads I, aVL, and/or V5V6, sometimes with posterior involvement (ST depression in V1V3). The prominent anterior lead changes in this ECG are not typical for isolated circumflex occlusion.
C. Left coronary artery: While technically the LAD is a branch of the left coronary artery, an occlusion of the left main coronary artery itself would produce a more extensive and often fatal infarction pattern with widespread ST elevation in both anterior and lateral leads, typically with more profound hemodynamic compromise.
D. Posterior descending artery: The posterior descending artery (usually a branch of the RCA in rightdominant systems) supplies the inferior and posterior portions of the heart. Occlusion would cause inferior and possibly posterior MI patterns, not the anterior pattern seen here.
This ECG demonstrates the classic presentation of LAD occlusion causing an anterior STEMI, making option E the correct answer."

**Photo+text Claude 3.7**

"Looking at this ECG more carefully with the additional clinical context, I need to revise my analysis.
The correct answer is: B. Left circumflex artery
 Rationale for selecting Left Circumflex artery:
Upon careful examination of this ECG with the clinical information provided, there are key findings that point to the left circumflex artery as the culprit vessel:
1. The ECG shows two distinct patterns (left and right panels):
 Left panel: A relatively normal baseline ECG
 Right panel: Shows dynamic Twave inversions in lateral leads (I, aVL) and precordial leads (V1V6)
2. The absence of significant ST elevations but presence of Twave inversions in the lateral leads is characteristic of left circumflex artery ischemia or recent occlusion that has now reperfused
3. The clinical context is critical here the patient has a history of intermittent chest pain at rest but was painfree at the time of ECG, suggesting unstable angina or a nonST elevation MI (NSTEMI) pattern, commonly associated with circumflex lesions
4. The circumflex territory often lacks dramatic ST elevations even during acute occlusion (the ""electrically silent"" area of the heart)
 Why the other options are incorrect:
A. Right coronary artery: RCA occlusion would typically show ST changes in inferior leads (II, III, aVF), which are not prominent in this ECG.
C. Left coronary artery: Left main disease would produce more widespread and dramatic changes affecting both anterior and lateral territories, often with hemodynamic compromise.
D. Posterior descending artery: PDA occlusion (usually from the RCA) would show inferior changes, potentially with posterior involvement (ST depression in V1V3), not the lateral and widespread Twave inversions seen here.
E. Left anterior descending artery: LAD occlusion typically produces more prominent ST elevations in the anterior leads (V1V4). The pattern here with Twave inversions but minimal ST elevation is more consistent with circumflex territory ischemia.
The combination of intermittent chest pain at rest, lack of acute ST elevations during painfree periods, and the pattern of Twave inversions in lateral and precordial leads points to the left circumflex artery as the most likely culprit vessel in this case of probable unstable angina or NSTEMI."

-------------------------------------------------------------------------------------------------------

**11.Patient ID: 20230112**

**URL**

[https://www.nejm.org/imagechallenge?ci=20230112&startFrom=101&startPage=6](https://www.nejm.org/image-challenge?ci=20230112&startFrom=101&startPage=6)

**Photoonly ChatGPT 4o**

Correct Answer: E. Sigmoid volvulus
 Rationale:
The CT images (axial in panel A and sagittal in panel B) show classic findings of sigmoid volvulus:
* "Coffee bean" sign in the axial view: This is created by a massively dilated sigmoid loop with apposed walls, mimicking the shape of a coffee bean.
* Whirl sign (best appreciated in sagittal view): Twisting of the mesentery and mesenteric vessels around the sigmoid colon, suggesting a torsion point.
* Marked colonic distention proximal to the torsion site, with a transition zone, is also visible.
This imaging appearance is characteristic of sigmoid volvulus, which typically presents with abdominal distension, pain, and constipation or obstipation, especially in elderly or institutionalized patients.
 Why the other options are incorrect:
* A. Crohn’s disease:
 Crohn’s disease typically presents with segmental bowel wall thickening, "skip lesions," and often involves the terminal ileum. There is no transmural inflammation, fistula, or stricture shown here. The CT does not show the bowel wall thickening or fat creeping typical of Crohn’s.
* B. Colocolonic intussusception:
 Intussusception would show a target or "sausageshaped" mass with alternating layers ("bowel within bowel"). No such concentric rings or telescoping of bowel segments are present.
* C. Colonic pseudoobstruction (Ogilvie’s syndrome):
 This condition presents with diffuse colonic dilation, particularly of the cecum and right colon, without mechanical obstruction. In this case, the obstruction appears mechanical and localized to the sigmoid.
* D. Ileocolic intussusception:
 This is more common in pediatric populations. It would show a softtissue mass in the right lower quadrant with telescoped small bowel into the colon. The location and morphology here are not consistent with ileocolic intussusception.
 Conclusion:
The CT findings are highly specific for sigmoid volvulus (E), given the colonic distension, transition point, and whirl appearance of the mesentery. This is a surgical or endoscopic emergency due to risk of ischemia and perforation.
Would you like management strategies or differential points in similar colonic obstructions?

**Photo+text ChatGPT 4o**

Correct Answer: D. Ileocolic intussusception
 Rationale:
The CT images (axial \[A] and sagittal \[B]) show a classic "target sign" or "bull’seye" appearance, which is characteristic of intussusception — especially in children. This appearance results from one segment of bowel telescoping into another, producing concentric rings of bowel wall on crosssection.
In this case:
* The location of the mass in the right lower quadrant.
* The patient's age (5 years) and intermittent abdominal pain.
* A normal ultrasound (which can sometimes miss transient intussusceptions) followed by a CT that definitively shows the lesion.
Together, these findings strongly suggest ileocolic intussusception, the most common type in children
 Why other options are incorrect:
* A. Crohn’s disease:
 Usually presents with bowel wall thickening, skip lesions, and possibly abscess or fistula formation. These findings are not seen on the CT. Also, Crohn’s is rare at this young age without a more chronic presentation.
* B. Colocolonic intussusception:
 Much rarer than ileocolic intussusception in children. Colocolonic involvement is more often due to a pathologic lead point like a polyp or tumor, which is uncommon in this age group.
* C. Colonic pseudoobstruction (Ogilvie’s syndrome):
 Occurs in older or critically ill patients, not in a healthy 5yearold. The colon is diffusely dilated in pseudoobstruction, not focal or telescoped as seen here.
* E. Sigmoid volvulus:
 Typically affects elderly or neurologically impaired individuals. CT would show the "whirl sign" or a dilated sigmoid loop, which is not evident in these images.
 Conclusion:
This is a textbook presentation of ileocolic intussusception (D), the most common form in young children. Prompt reduction via air or contrast enema is typically the next step in management.

Would you like to go over the management algorithm or complications to monitor for in such cases?

**Photoonly Claude 3.7**

"Looking at the CT images provided, I can see characteristic findings that help identify the diagnosis among the given options.
The correct answer is: B. Colocolonic intussusception
Rationale for selecting colocolonic intussusception:
The CT images show the classic ""target"" or ""bull'seye"" sign in the axial view (image A) and the ""sausageshaped"" appearance in the sagittal view (image B). These are pathognomonic radiographic findings of intussusception. Specifically, we can see telescoping of one segment of bowel (intussusceptum) into an adjacent distal segment (intussuscipiens), creating concentric rings of bowel wall on the axial image.
The location appears to be in the colon (not involving the terminal ileum), making this a colocolonic intussusception rather than an ileocolic one. The appearance is consistent with large bowel telescoping into large bowel.
Why the other options are incorrect:
A. Crohn's disease While Crohn's can present with bowel wall thickening, it typically shows skip lesions, inflammatory changes in the mesentery, and often affects the terminal ileum. The characteristic target sign of intussusception is not a feature of Crohn's disease.
C. Colonic pseudoobstruction This condition presents with massive dilatation of the colon without mechanical obstruction. The images don't show the diffuse colonic dilatation typical of pseudoobstruction but rather show telescoping bowel segments.
D. Ileocolic intussusception While this is an intussusception, the location appears to be entirely within the colon rather than involving the terminal ileum telescoping into the colon. The caliber of the involved bowel segments suggests colocolonic rather than ileocolic involvement.
E. Sigmoid volvulus Sigmoid volvulus typically presents with a massively dilated sigmoid colon with a ""coffee bean"" appearance on axial images or an ""omega sign"" on plain films. The images don't show the characteristic whirl sign of a volvulus but instead show the concentric rings of intussusception."

**Photo+text Claude 3.7**

"Based on the clinical presentation and CT findings, the correct answer is:
D. Ileocolic intussusception
Rationale for selecting ileocolic intussusception:
The CT images show the characteristic radiographic findings of intussusception. In the axial view (Panel A), there is a ""target sign"" or ""bull'seye"" appearance, showing concentric rings formed by the telescoping of one segment of bowel (intussusceptum) into another (intussuscipiens). The sagittal view (Panel B) shows the characteristic ""sausageshaped"" appearance.
Given the patient is a 5yearold boy with intermittent abdominal pain in the periumbilical region, the clinical presentation strongly supports ileocolic intussusception, which is the most common type of intussusception in children. Typically, ileocolic intussusception occurs when the terminal ileum telescopes into the ascending colon, creating the radiographic findings we see.
The intermittent nature of the pain is classic for intussusception in children, who often experience episodic, colicky abdominal pain that causes them to draw up their knees to their chest, followed by periods of relative comfort.
Why the other options are incorrect:
A. Crohn's disease Uncommon in a 5yearold child and would present with more chronic symptoms. The CT would typically show bowel wall thickening, skip lesions, and mesenteric inflammation rather than the target sign seen here.
B. Colocolonic intussusception While this is a type of intussusception, it's far less common in children. Ileocolic is the predominant type in pediatric patients (accounting for about 90% of cases).
C. Colonic pseudoobstruction This is rare in children and would present with massive colonic dilatation without a mechanical obstruction. The target sign would not be present.
E. Sigmoid volvulus Extremely rare in children and would present with a ""coffee bean"" or ""omega sign"" appearance on imaging rather than the target sign. The patient would likely have more severe symptoms of obstruction.
The combination of the patient's age (5 years), clinical presentation (intermittent periumbilical pain), and characteristic target sign on CT makes ileocolic intussusception the most likely diagnosis."

-------------------------------------------------------------------------------------------------------

**12.Patient ID: 20230427**

**URL**

[https://www.nejm.org/imagechallenge?ci=20230427&startFrom=101&startPage=6](https://www.nejm.org/image-challenge?ci=20230427&startFrom=101&startPage=6)

**Photoonly ChatGPT 4o**

Correct answer: B. Gardening
 Diagnosis: Sporotrichosis (Sporothrix schenckii infection)
 Rationale:*
The images show:
* Nodular, erythematous lesions along lymphatic channels (classic *sporotrichoid* spread).
* Ulcerated lesions (suggesting secondary breakdown of nodules).
* The distribution is consistent with inoculation of a pathogen into the skin with subsequent lymphocutaneous spread.
Sporotrichosis, caused by *Sporothrix schenckii*, is a dimorphic fungus found in soil, plants, and decaying vegetation. The infection typically occurs via inoculation from a thorn or splinter, often during gardening or handling sphagnum moss or rose bushes. The infection starts as a painless papule that may ulcerate and then spread proximally along lymphatics forming similar lesions (sporotrichoid pattern).
 Why the other choices are incorrect:
* A. Cleaning a fish tank – This is associated with *Mycobacterium marinum*, which can also cause a sporotrichoid pattern, but lesions are usually more indolent, less inflammatory, and have a bluish hue.
* C. Getting bitten by a sandfly – Sandflies transmit *Leishmania* spp. Cutaneous leishmaniasis presents with chronic, nonhealing ulcers, but lymphocutaneous spread is less typical, and geographic/travel history is usually relevant.
* D. Handling feline waste – May suggest *Toxoplasma gondii*, which causes systemic rather than cutaneous disease, especially in immunocompromised hosts.
* E. Petting an armadillo – Armadillos are reservoirs for *Mycobacterium leprae* (leprosy), which causes chronic skin lesions and neuropathy, not acute nodular lymphocutaneous lesions.
Would you like additional information on diagnosis or treatment of sporotrichosis?

**Photo+text ChatGPT 4o**

Correct answer: A. Cleaning a fish tank
 Diagnosis: Cutaneous infection with *Mycobacterium marinum*
 Rationale:
The patient has:
* Painful skin lesions with nodular and ulcerative appearance, some in a sporotrichoid distribution (ascending lymphatic spread).
* Filamentous, grampositive, acidfast branching rods on culture.
These findings are classic for *Mycobacterium marinum*, a slowgrowing nontuberculous mycobacterium that causes fish tank granuloma. It is acquired through minor trauma in the setting of exposure to contaminated fresh or saltwater, especially in aquariums or fish tanks.
The organism prefers cooler temperatures (28–33°C), which explains its restriction to extremities.
 Why other options are incorrect:
* B. Gardening – Associated with *Sporothrix schenckii* (sporotrichosis), but that organism is a dimorphic fungus and not acidfast.
* C. Getting bitten by a sandfly – Associated with *Leishmania* spp., which are protozoa, not filamentous acidfast rods.
* D. Handling feline waste – Relevant for *Toxoplasma gondii* (protozoan), and not linked to this cutaneous presentation.
* E. Petting an armadillo – Linked to *Mycobacterium leprae* (leprosy), but the organism is not filamentous or branching on culture, and leprosy presents more indolently with nerve involvement
 Summary:
The presence of acidfast, filamentous, branching rods and a compatible clinical picture (hand/forearm lesions after likely aquatic exposure) point definitively to *Mycobacterium marinum* from cleaning a fish tank.

**Photoonly Claude 3.7**

"Based on the clinical images provided, I'll analyze this dermatological case and select the most likely diagnosis from the given options.
The correct answer is: E. Petting an armadillo
Detailed rationale for selecting option E:
The images show multiple erythematous nodular and ulcerating lesions on the hand and forearm that are highly consistent with a cutaneous mycobacterial infection, specifically Mycobacterium leprae infection (leprosy). This bacterium is naturally found in armadillos, which are a known reservoir in the Americas. The lesions display characteristic features of leprosy:
 Multiple erythematous nodules clustered on the dorsum of the hand
 Ulcerative lesions on the forearm with raised, welldemarcated borders
 Distribution pattern along superficial peripheral nerves (visible in the right image)
Mycobacterium leprae transmission from armadillos to humans has been welldocumented, particularly in the southern United States and parts of Latin America. Direct contact through handling or petting armadillos is a recognized risk factor for acquiring this infection.
Why the other options were excluded:
A. Cleaning a fish tank:
Fish tank exposure typically causes Mycobacterium marinum infections (""fish tank granuloma""), which usually present as a solitary nodule or sporotrichoid spread (linear pattern following lymphatics) rather than the multiple clustered nodules seen here. M. marinum lesions also tend to be more localized to the initial inoculation site.
B. Gardening:
Gardeningrelated infections like sporotrichosis (from Sporothrix schenckii) typically show a characteristic lymphangitic spread pattern with ""sporotrichoid"" distribution along lymphatic channels. The lesions in the image lack this pattern and are more nodular and grouped than what would be expected with sporotrichosis.
C. Getting bitten by a sandfly:
Sandfly bites cause leishmaniasis, which typically presents with a single painless ulcer with raised borders (the ""volcanic ulcer""). The multiple nodular lesions and distribution pattern seen in these images are inconsistent with leishmaniasis.
D. Handling feline waste:
This activity is associated with toxoplasmosis, which rarely causes cutaneous manifestations of this nature. Exposure to cat feces might occasionally lead to cutaneous larva migrans (from parasitic hookworms), but this presents as serpiginous, pruritic tracks rather than nodular lesions seen in the images.
The clinical presentation, with multiple nodular and ulcerative lesions on exposed areas of the upper extremity, is most consistent with early lepromatous leprosy acquired through contact with an armadillo."

**Photo+text Claude 3.7**

"Based on the clinical images and the additional case information provided, I'll analyze this case to determine the most likely diagnosis.
The correct answer is: B. Gardening
Detailed rationale for selecting option B:
The images show multiple erythematous, nodular, and ulcerating lesions on the dorsum of the hand and forearm. The crucial diagnostic clue is the culture result showing ""filamentous, grampositive, acidfast branching rods."" This microbiological profile is characteristic of Nocardia species, which are soildwelling actinomycetes.
The clinical presentation of multiple subcutaneous nodules combined with the microbiological features (filamentous, grampositive, partially acidfast, branching organisms) is highly consistent with cutaneous nocardiosis. This infection typically occurs through traumatic inoculation of the organism during outdoor activities, particularly gardening, where soil contact is common. The patient likely sustained minor trauma to her hand while gardening, allowing the Nocardia organisms present in soil to enter the skin.
Why the other options were excluded:
A. Cleaning a fish tank:
Fish tank exposure typically leads to Mycobacterium marinum infection, which presents with a single nodule or sporotrichoid pattern of spread. While M. marinum is acidfast, it is not filamentous or branching, and doesn't match the description of the organism cultured from this patient.
C. Getting bitten by a sandfly:
Sandfly bites cause leishmaniasis, which is caused by a protozoan parasite (not filamentous bacteria). The culture wouldn't yield filamentous acidfast bacilli, and the clinical presentation would typically be a single ulcer with raised borders.
D. Handling feline waste:
This activity is associated with toxoplasmosis or catscratch disease (Bartonella henselae), neither of which would produce filamentous, acidfast, branching rods on culture. These pathogens are neither filamentous nor acidfast.
E. Petting an armadillo:
Armadillos are reservoirs for Mycobacterium leprae, which causes leprosy. While M. leprae is acidfast, it is not filamentous or branching. Additionally, the acute presentation of painful lesions within 10 days is inconsistent with leprosy, which has a much longer incubation period (months to years) and typically presents with nonpainful, hypopigmented or erythematous patches.
The combination of clinical presentation, rapid onset, and most importantly, the characteristic microbiological findings of filamentous, grampositive, acidfast branching rods points conclusively to Nocardia infection acquired through gardening activities."

------------------------------------------------------------------------------------------------------

**13.Patient ID:** 20250130

**URL**

[https://www.nejm.org/imagechallenge?ci=20250130&startFrom=1&startPage=1](https://www.nejm.org/image-challenge?ci=20250130&startFrom=1&startPage=1)

**Photoonly ChatGPT 4o**

Correct answer: A. Geographic tongue
 Rationale:
The image shows a tongue with multiple erythematous (red), welldemarcated patches on the dorsal surface, surrounded by serpiginous white borders. These findings are classic for Geographic tongue, also known as benign migratory glossitis.
Geographic tongue is:
* A benign inflammatory condition
* Characterized by erythematous depapillated areas of the tongue that migrate over time
* Surrounded by a white, raised, serpiginous or scalloped border
* Often asymptomatic, though some patients may report sensitivity to spicy or acidic foods
 Why the other options are incorrect:
* B. Lichen Planus: Typically presents as reticular white lines (Wickham striae) on the buccal mucosa; erosive forms can involve the tongue but do not have the migratory, sharply demarcated red patches with white borders seen here.
* C. Oral leukoplakia: Appears as a white, nonremovable plaque with a risk of dysplasia or carcinoma in situ. It does not present with red patches and migratory features.
* D. Secondary syphilis: May present with mucous patches in the oral cavity, but these are usually more diffuse, shallow, and may be accompanied by other systemic signs (e.g., rash on palms and soles, generalized lymphadenopathy).
* E. Squamous Cell Carcinoma (SCC): Typically presents as an ulcerated or indurated lesion, often persistent and possibly painful. SCC is not migratory and lacks the characteristic appearance seen here.
 Conclusion:
The clinical presentation — red patches with serpiginous white borders on the dorsal tongue — is characteristic of Geographic tongue (A). The appearance is benign and selflimiting, often not requiring treatment unless symptomatic.

**Photo+text ChatGPT 4o**

Correct answer: D. Secondary syphilis
 Rationale:
This 29yearold man with wellcontrolled HIV presents with:
* A 1week history of painful, whitish discoloration on the tongue
* A recent history of scrotal ulcers (now resolved)
* Physical exam findings: smooth, pink, guttate macules within a white coating that does not wipe off
These findings, along with the patient’s risk factors (HIV infection) and a history of genital ulcers, are highly suggestive of secondary syphilis, which can involve mucous patches in the oral cavity. Mucous patches are:
* Painless to painful
* Graywhite in color
* Often located on the tongue or buccal mucosa
* May be accompanied by a serpiginous or annular erythematous base
Oral involvement in secondary syphilis can present even after genital ulcers have healed, making the history highly compatible.
 Why the other options are incorrect:
* A. Geographic tongue: Characterized by migratory, erythematous patches with white borders, typically asymptomatic or mildly symptomatic. There is no association with genital ulcers, and the appearance here does not match the typical serpiginous or maplike borders.
* B. Lichen Planus: Appears as white, lacy (reticular) lesions, primarily involving the buccal mucosa; it does not typically present with guttate macules or associated genital ulcers.
* C. Oral leukoplakia: Defined as white plaques that cannot be scraped off and are premalignant, but they are not associated with systemic symptoms or prior genital ulceration.
* E. Squamous Cell Carcinoma (SCC): Usually presents as a persistent ulcer, indurated plaque, or mass, not as multiple guttate macules. SCC also typically lacks the described systemic history or mucosal distribution seen in secondary syphilis.
 Conclusion:
Given the combination of oral mucous patches, a recent history of scrotal ulcers, and the patient’s HIV status, the most likely diagnosis is D. Secondary syphilis.

**Photo+text Claude 3.7**

"Based on the clinical image provided, the correct answer is:
D. Secondary syphilis
Rationale for choosing Secondary syphilis:
The image shows characteristic findings of secondary syphilis involving the tongue. The most distinctive feature is the presence of multiple erythematous patches with white/gray areas that give the appearance of ""mucous patches."" These lesions are typically painless and represent a manifestation of disseminated treponemal infection. Secondary syphilis typically appears 410 weeks after the primary chancre and represents the hematogenous spread of Treponema pallidum. Oral manifestations are common in secondary syphilis and can involve the tongue, palate, and oral mucosa. This pattern of multiple, welldemarcated erythematous patches on the tongue is highly suggestive of secondary syphilis.
Why the other options were excluded:
A. Geographic tongue:
While geographic tongue (benign migratory glossitis) can present with erythematous patches with white borders, the lesions typically have a more maplike appearance with irregular borders that change location over time. The image shows more discrete, punctate lesions rather than the typical migratory pattern seen in geographic tongue. Additionally, the lesions in geographic tongue often have a more pronounced white border surrounding the erythematous areas.
B. Lichen Planus:
Oral lichen planus typically presents with white, lacelike (reticular) patterns, often with Wickham's striae. The erosive form can have erythematous areas, but the pattern in the image lacks the characteristic reticular white lines or striae seen in lichen planus. Lichen planus lesions also tend to be more symmetrical and can affect the buccal mucosa, gingiva, and tongue.
C. Oral leukoplakia:
Leukoplakia presents as white patches or plaques that cannot be rubbed off and cannot be characterized as any other disease. The image shows predominantly erythematous lesions with some white areas, which is inconsistent with the predominantly white appearance of leukoplakia. Leukoplakia is also typically more localized rather than showing the scattered pattern seen in this image.
E. Squamous Cell Carcinoma:
Oral squamous cell carcinoma typically presents as a single, persistent ulcer, mass, or indurated lesion, often with irregular borders. It does not present with the multiple erythematous patches seen in this image. SCC tends to be localized rather than showing the diffuse pattern visible here. Additionally, SCC often has areas of induration or ulceration that are not apparent in this image."

**Photo+text Claude 3.7**

"Based on the clinical image and case description provided, the correct answer is:
A. Geographic tongue
Rationale for choosing Geographic tongue:
The image shows characteristic findings of geographic tongue (benign migratory glossitis). The most distinctive features include:
Multiple erythematous patches (smooth, pink, guttate macules as described in the case)
Areas with white coating that cannot be wiped off
The pattern resembles a maplike or geographic appearance on the tongue surface
The clinical history of a relatively acute onset (1week history) is consistent with geographic tongue
Geographic tongue is a benign inflammatory condition that can sometimes be painful or uncomfortable. The pattern shown in the image is classic for this condition, with welldemarcated erythematous areas that appear denuded of papillae, surrounded by white borders. The condition can wax and wane, with lesions changing in appearance and location over time.
Why the other options were excluded:
B. Lichen Planus:
Oral lichen planus typically presents with white, lacelike (reticular) patterns with characteristic Wickham's striae. The lesions tend to be more symmetrical and lack the geographic pattern seen in this image. While erosive lichen planus can be painful, it typically has more distinct white striae at the periphery of erythematous areas.
C. Oral leukoplakia:
Leukoplakia presents as homogeneous white plaques that cannot be rubbed off and cannot be attributed to any other disease. The image shows a mix of erythematous and white areas in a maplike pattern, which is inconsistent with the more uniform appearance of leukoplakia. Additionally, leukoplakia is typically not painful unless malignant transformation has occurred.
D. Secondary syphilis:
While secondary syphilis can cause oral manifestations including mucous patches, the appearance is typically more of discrete, graywhite plaques on an erythematous base, often described as ""snailtrack ulcers."" Additionally, secondary syphilis would typically be accompanied by other systemic manifestations and a more prominent genital presentation rather than resolved lesions. The pattern in the image lacks the characteristic appearance of syphilitic mucous patches.
E. Squamous Cell Carcinoma:
Oral squamous cell carcinoma typically presents as a persistent ulcer, mass, or indurated lesion with irregular borders. It does not present with the multiple erythematous patches in a maplike pattern seen in this image. SCC tends to be localized rather than showing the diffuse pattern visible here, and would typically show induration and tissue destruction that is not apparent in this image."
