# Supplementary material for: Comparison of Multimodal Large Language Models and Physicians for Medical Diagnosis Using NEJM Image Challenge Cases: Cross-sectional Study
Source: Research Square preprint supplement (doi:10.21203/rs.3.rs-7175790/v1), 2025-09-01
Supplement: Supplementary file 5 [file e8596d2ca19a516fc192255a.docx]

Possible Explanations for Diagnostic Errors After Adding Clinical Text in 13 Image Challenge Cases

| Patient ID | Likely Cause of Misdiagnosis with Text | URL |  |
| --- | --- | --- | --- |
| 20211007 | Clinical context (elderly, immunocompromised, fever/confusion) caused overemphasis on **Listeriosis** instead of imaging-characteristic **Nocardiosis**. | [Link](https://www.nejm.org/image-challenge?ci=20211007&startFrom=181&startPage=10) |  |
| 20191205 | Description of “soft mass increases with crying” in a neonate misled to **Prolapsed Uterus**; imaging favored **Hydrocolpos**. | [Link](https://www.nejm.org/image-challenge?ci=20191205&startFrom=261&startPage=14) |  |
| 20200206 | Non-specific swelling and elderly context led to **Carcinoma of the tongue**; image was classic for **Sublingual epidermoid cyst**. | [Link](https://www.nejm.org/image-challenge?ci=20200206&startFrom=261&startPage=14) |  |
| 20200305 | HIV/immunosuppressed background and “B symptoms” led to **DLBCL**; imaging supported **Disseminated Mycobacterium avium-intracellulare**. | [Link](https://www.nejm.org/image-challenge?ci=20200305&startFrom=261&startPage=14) |  |
| 20210218 | Elderly, weight loss, and abdominal mass misled to **Abdominal aortic aneurysm**; image showed **Urachal mucinous cystic tumor**. | [Link](https://www.nejm.org/image-challenge?ci=20210218&startFrom=201&startPage=11) |  |
| 20210304 | Subacute cough/dyspnea led to **Diffuse alveolar hemorrhage**; “sandstorm” X-ray supported **Pulmonary alveolar microlithiasis**. | [Link](https://www.nejm.org/image-challenge?ci=20210304&startFrom=201&startPage=11) |  |
| 20210401 | Text focus on tick bite, fever, and lymphadenopathy favored **RMSF**; eschar and lymph nodes fit **Tularemia**. | [Link](https://www.nejm.org/image-challenge?ci=20210401&startFrom=201&startPage=11) |  |
| 20220324 | Text mentioned cholesterol emboli—led to **Livedo reticularis**; skin pattern was more consistent with **Livedo racemosa**. | [Link](https://www.nejm.org/image-challenge?ci=20220324&startFrom=141&startPage=8) |  |
| 20200220 | Clinical context of tongue swelling in elderly—model chose **Carcinoma**; image pointed to **Beckwith-Wiedemann syndrome** (macroglossia). | [Link](https://www.nejm.org/image-challenge?ci=20200220&startFrom=261&startPage=14) |  |
| 20210121 | Young adult, fever, and mass symptoms in text—model picked **Lymphoma**; image showed **Castleman disease**. | [Link](https://www.nejm.org/image-challenge?ci=20210121&startFrom=201&startPage=11) |  |
| 20210311 | Clinical symptoms (pain/swelling) suggested **Abscess**; imaging classic for **Cysticercosis**. | [Link](https://www.nejm.org/image-challenge?ci=20210311&startFrom=201&startPage=11) |  |
| 20210506 | Sextual clues (weight loss, GI symptoms) misled to **Colon cancer**; image was consistent with **GIST (gastrointestinal stromal tumor)**. | [Link](https://www.nejm.org/image-challenge?ci=20210506&startFrom=201&startPage=11) |  |
| 20210520 | Middle-aged patient, chronic symptoms—model chose **Sarcoidosis**; imaging was classic for **Pulmonary Langerhans cell histiocytosis**. | [Link](https://www.nejm.org/image-challenge?ci=20210520&startFrom=201&startPage=11) |  |
